# Supplementary material for: Nitrate promoted mild and versatile Pd-catalysed C(sp2)–H oxidation with carboxylic acids
Source: Royal Society of Chemistry journal article supplement (doi:10.1039/d0ob01124j), 2020-01-01
Supplement: d0ob01124j1.pdf [file d0ob01124j1.pdf]

## Supporting Information

# Nitrate Promoted Mild and Versatile Pd-catalysed C(*sp*<sup>2</sup>)-H Oxidation with Carboxylic Acids

### Table of Contents

|       |                                                                         |     |
|-------|-------------------------------------------------------------------------|-----|
| I.    | General .....                                                           | S2  |
| II.   | Conditions Screening for the C-H bond oxidation of O-methyl oxime ..... | S2  |
| III.  | Conditions Screening for the C-H bond oxidation of Azobenzene .....     | S5  |
| IV.   | Typical experimental procedure for synthesis of products .....          | S6  |
| V.    | Reactivities of the Pd complexes in the oxidation reactions .....       | S7  |
| VI.   | Computational Studies .....                                             | S9  |
| VII.  | Characterization of the products .....                                  | S13 |
| VIII. | References .....                                                        | S33 |
| IX.   | NMR spectra .....                                                       | S34 |
| X.    | DFT optimized Cartesian coordinates of all structures .....             | S99 |

## I. General

Unless otherwise stated, all reagents were purchased from commercial suppliers and used without purification. Most  $^1\text{H}$  NMR and  $^{13}\text{C}$  NMR spectra were obtained on a Bruker AVANCE III 500 instrument in  $\text{CDCl}_3$  using TMS as an internal standard, operating at 500 MHz and 126 MHz, respectively. Some  $^1\text{H}$  NMR and  $^{13}\text{C}$  NMR spectra were obtained on a Bruker ASCEND (600M) instrument in  $\text{CDCl}_3$  using TMS as an internal standard, operating at 600 MHz and 151 MHz, respectively. Chemical shifts are expressed in ppm and coupling constants  $J$  are given in Hz. For  $\text{CDCl}_3$  or  $\text{DMSO-}d_6$  solutions the chemical shifts are reported as parts per million (ppm) to residual protium or carbon of the solvents;  $\text{CHCl}_3$  H (7.28 ppm) and  $\text{CDCl}_3$  C (77.03 ppm). GC experiments were carried out using Agilent 7890B GC. GC-MS experiments that used dodecane as an internal standard were performed with a Thermo DSQ II, Trace GC Ultra. High resolution mass spectra (HRMS (ESI-TOF)) were obtained on an Agilent 6545 Q-TOF LCMS spectrometer equipped with an ESI source.

## II. Conditions Screening for the C-H bond oxidation of O-methyl oxime

Table S1. Screening of oxidants<sup>a</sup>

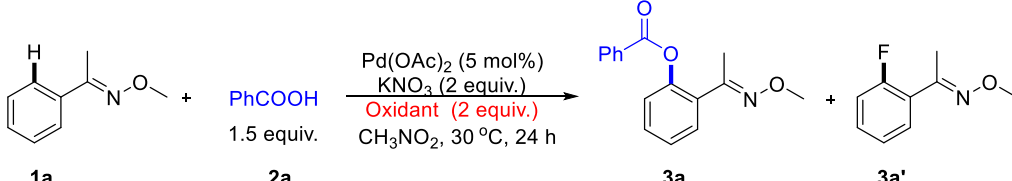

| Entry          | Oxidant                                                       | Conv. of 1a (%) | Yield of 3a (%) <sup>b</sup> | Yield of 3a' (%) <sup>b</sup> |
|----------------|---------------------------------------------------------------|-----------------|------------------------------|-------------------------------|
| 1              | Selectfluor                                                   | 99              | 74                           | 8                             |
| 2 <sup>c</sup> | Selectfluor                                                   | 95              | 72                           | 11                            |
| 3              | O <sub>2</sub>                                                | NR              | --                           | --                            |
| 4              | NFSI                                                          | 86              | 59                           | 26                            |
| 5              | Air                                                           | NR              | --                           | --                            |
| 6              | Na <sub>2</sub> S <sub>2</sub> O <sub>8</sub>                 | 12              | 2                            | --                            |
| 7              | (NH <sub>4</sub> ) <sub>2</sub> S <sub>2</sub> O <sub>8</sub> | NR              | --                           | --                            |
| 8              | PhI(OAc) <sub>2</sub>                                         | 40              | --                           | --                            |
| 9              | Cu(OAc) <sub>2</sub>                                          | NR              | --                           | --                            |
| 10             | BQ                                                            | 15              | --                           | --                            |
| 11             | CAN                                                           | 92              | 65                           | --                            |

<sup>a</sup>Reaction conditions: **1a** (0.1 mmol, 14.9 mg), PhCOOH (0.15 mmol, 18.3 mg), Oxidant (0.2 mmol), KNO<sub>3</sub> (0.2 mmol, 20.2 mg), Pd(OAc)<sub>2</sub> (5 mol%, 1.2 mg), CH<sub>3</sub>NO<sub>2</sub> (1 mL), 30 °C, 24 h, <sup>b</sup>GC yields,

<sup>c</sup>Under N<sub>2</sub> atmosphere.

**Table S2.** Screening of solvents<sup>a</sup>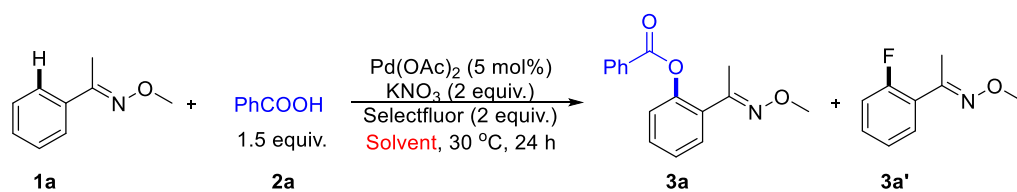

| Entry | Solvent                         | Conv. of 1a (%) | Yield of 3a (%) <sup>b</sup> | Yield of 3a' (%) <sup>b</sup> |
|-------|---------------------------------|-----------------|------------------------------|-------------------------------|
| 1     | CH <sub>3</sub> NO <sub>2</sub> | 99              | 74                           | 8                             |
| 2     | DCE                             | 45              | 44                           | --                            |
| 3     | DCM                             | 35              | 34                           | --                            |
| 4     | DMF                             | NR              | --                           | --                            |
| 5     | Toluene                         | 16              | 15                           | --                            |
| 6     | MeOH                            | NR              | --                           | --                            |
| 7     | Dioxane                         | NR              | --                           | --                            |
| 8     | THF                             | NR              | --                           | --                            |
| 9     | EtOAc                           | NR              | --                           | --                            |
| 10    | MeCN                            | 45              | 44                           | --                            |
| 11    | Acetone                         | NR              | --                           | --                            |

<sup>a</sup>Reaction conditions: **1a** (0.1 mmol, 14.9 mg), PhCOOH (0.15 mmol, 18.3 mg), Selectfluor (0.2 mmol, 70.8 mg), KNO<sub>3</sub> (0.2 mmol, 20.2 mg), Pd(OAc)<sub>2</sub> (5 mol%, 1.2 mg), Solvent (1 mL), 30 °C, 24 h, under air, <sup>b</sup>GC yields.

**Table S3.** Screening of nitrate additives<sup>a</sup>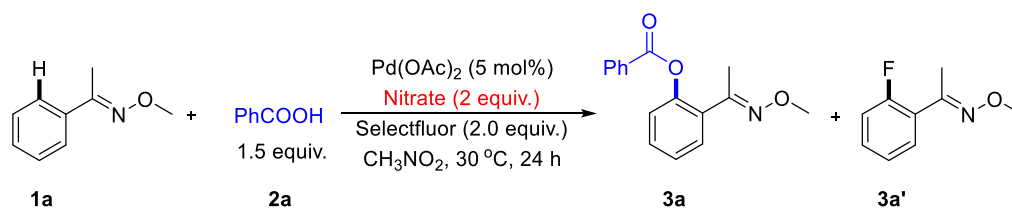

| Entry | Nitrate                                               | Conv. of 1a (%) | Yield of 3a (%) <sup>b</sup> | Yield of 3a' (%) <sup>b</sup> |
|-------|-------------------------------------------------------|-----------------|------------------------------|-------------------------------|
| 1     | KNO <sub>3</sub>                                      | 99              | 74                           | 8                             |
| 2     | /                                                     | 21              | 13                           | 0                             |
| 3     | AgNO <sub>3</sub>                                     | 99              | 73                           | 16                            |
| 4     | LiNO <sub>3</sub>                                     | 99              | 54                           | 5                             |
| 5     | NaNO <sub>3</sub>                                     | 95              | 73                           | 18                            |
| 6     | Mg(NO <sub>3</sub> ) <sub>2</sub> • 6H <sub>2</sub> O | 99              | 30                           | --                            |
| 7     | Fe(NO <sub>3</sub> ) <sub>3</sub> • 9H <sub>2</sub> O | 99              | 23                           | 16                            |
| 8     | Cu(NO <sub>3</sub> ) <sub>2</sub>                     | 97              | 40                           | --                            |
| 9     | Ba(NO <sub>3</sub> ) <sub>3</sub>                     | 99              | 38                           | --                            |

<sup>a</sup>Reaction conditions: **1a** (0.1 mmol, 14.9 mg), PhCOOH (0.15 mmol, 18.3 mg), Selectfluor (0.2 mmol, 70.8 mg), Nitrate (0.2 mmol), Pd(OAc)<sub>2</sub> (5 mol%, 1.2 mg), CH<sub>3</sub>NO<sub>2</sub> (1 mL), 30 °C, 24 h, <sup>b</sup>GC yields.

### III. Conditions Screening for the C-H bond oxidation of Azobenzene

**Table S4.** Screening of azobenzene oxidation conditions<sup>a</sup>

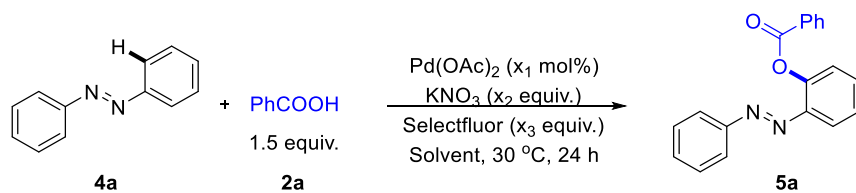

| Entry                 | Pd(OAc) <sub>2</sub> | KNO <sub>3</sub>  | Solvent                         | Selectfluor       | Yield of 5a (%) <sup>b</sup> |
|-----------------------|----------------------|-------------------|---------------------------------|-------------------|------------------------------|
| 1                     | 5 mol%               | 0.2 equiv.        | CH <sub>3</sub> NO <sub>2</sub> | 2.0 equiv.        | 57                           |
| 2                     | 5 mol%               | 0.2 equiv.        | DCE                             | 2.0 equiv.        | 74                           |
| 3                     | 5 mol%               | 0.4 equiv.        | DCE                             | 2.0 equiv.        | 76                           |
| 4                     | 5 mol%               | 1.0 equiv.        | DCE                             | 2.0 equiv.        | 62                           |
| 5                     | 5 mol%               | 2.0 equiv.        | DCE                             | 2.0 equiv.        | 66                           |
| 6                     | 5 mol%               | 0 equiv.          | DCE                             | 2.0 equiv.        | 32                           |
| 7                     | 5 mol%               | 0.4 equiv.        | DCE                             | 1.5 equiv.        | 51                           |
| 8                     | 5 mol%               | 0.4 equiv.        | DCE                             | 2.0 equiv.        | 74                           |
| 9                     | 5 mol%               | 0.4 equiv.        | DCE                             | 2.5 equiv.        | 86                           |
| 10                    | 10 mol%              | 0.4 equiv.        | DCE                             | 2.0 equiv.        | 84                           |
| 11                    | 15 mol%              | 0.4 equiv.        | DCE                             | 2.0 equiv.        | 80                           |
| <b>12<sup>c</sup></b> | <b>10 mol%</b>       | <b>0.4 equiv.</b> | <b>DCE</b>                      | <b>2.5 equiv.</b> | <b>88</b>                    |
| 13 <sup>c</sup>       | 15 mol%              | 0 equiv.          | DCE                             | 2.5 equiv.        | 19                           |

<sup>a</sup>Reaction conditions: **4a** (0.1 mmol, 18.2 mg), PhCOOH (0.15 mmol, 18.3 mg), Selectfluor ( $x_3$  equiv.), KNO<sub>3</sub> ( $x_2$  equiv.), Pd(OAc)<sub>2</sub> ( $x_1$  mol%), Solvent (1 mL), 30 °C, 24 h, under air, <sup>b</sup>GC yields,

<sup>c</sup>AgNO<sub>3</sub> instead of KNO<sub>3</sub> and PdCl<sub>2</sub> instead of Pd(OAc)<sub>2</sub>.

#### IV. Typical experimental procedure for synthesis of products

##### A. Typical experimental procedure for synthesis of 1 and 4

O-methyl oximes **1** and azobenzenes **4** were prepared according to the literature procedure.<sup>1</sup>

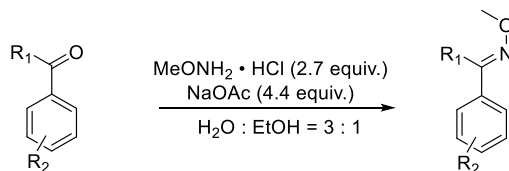

In a 50 mL round bottom flask equipped with a stir bar, acetophenone (1.7 mmol, 1 *equiv.*), MeONH<sub>2</sub>·HCl (384.2 mg, 4.6 mmol, 2.7 *equiv.*), NaOAc (615 mg, 7.5 mmol, 4.4 *equiv.*), H<sub>2</sub>O (15 mL), and EtOH (5 mL). The flask was equipped with a reflux condenser and heated at 70 °C for 2 h. After cooling, the mixture was extracted with EtOAc (3 x 15 mL). The organic layers were combined, dried with MgSO<sub>4</sub>, and concentrated to afford the desired product oximes.

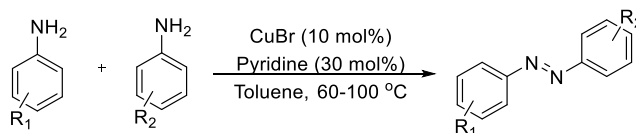

In a 100 mL round bottom flask equipped with a stir bar, CuBr (143 mg, 1.0 mmol, 0.2 *equiv.*), pyridine (253.1 mg, 3.2 mmol, 0.6 *equiv.*), aniline-R<sub>1</sub> (5 mmol, 1.0 *equiv.*) and aniline-R<sub>2</sub> (5 mmol, 1.0 *equiv.*) were mixed in toluene (60 mL). The reaction mixture was vigorously stirred at 60-100 °C for 24 h. After cooling down to room temperature and concentrating under vacuum, the residue was purified by silica gel chromatography (petroleum ether) to afford the desired product azobenzenes.

##### B. Typical experimental procedure for synthesis of 3

In a 10 mL test tube equipped with a stir bar, O-methyl oxime **1** (0.3 mmol, 1.0 *equiv.*), **2** (0.45 mmol, 1.5 *equiv.*), Pd(OAc)<sub>2</sub> (3.4 mg, 0.015 mmol, 5 mol%), Selectfluor (212.4 mg, 0.6 mmol, 2.0 *equiv.*), KNO<sub>3</sub> (60.6 mg, 0.6 mmol, 2.0 *equiv.*) and CH<sub>3</sub>NO<sub>2</sub> (3.0 mL) were added successively. Then the tube was sealed at indicated temperature for 24 h under stirring. Upon completion, the residue was purified by silica gel chromatography (petroleum ether / EtOAc = 30:1) to afford the desired products **3**.

##### C. Typical experimental procedure for synthesis of 5

In a 10 mL test tube equipped with a stir bar, azobenzene **4** (0.3 mmol, 1.0 *equiv.*), **2** (0.45 mmol, 1.5 *equiv.*), PdCl<sub>2</sub> (5.1 mg, 0.03 mmol, 10 mol%), Selectfluor (258.8 mg, 0.75 mmol, 2.5 *equiv.*), AgNO<sub>3</sub> (20.4 mg, 0.12 mmol, 0.4 *equiv.*) and DCE (3.0 mL) were added successively. Then the tube was sealed at indicated temperature for 24 h under stirring. Upon completion, the residue was purified by silica gel chromatography (petroleum ether / EtOAc = 30:1) to afford the desired products **5**.

## V. Reactivities of the Pd complexes in the oxidation reactions

### (A) Preparation of Pd(II) complexes

**Int-I**, **Int-II** were prepared according to the literature procedures.<sup>1</sup>

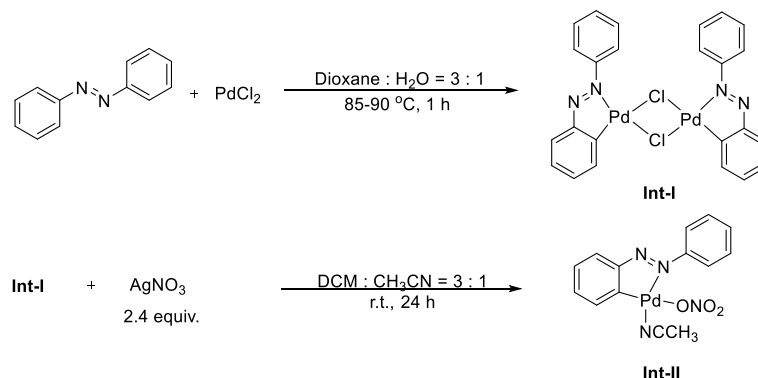

### (B) Catalytic activity of Int-I

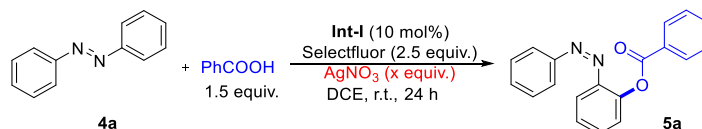

| Entry | [Pd]         | AgNO <sub>3</sub> | Yield of 5a <sup>b</sup> |
|-------|--------------|-------------------|--------------------------|
| 1     | <b>Int-I</b> | 0                 | 27                       |
| 2     | <b>Int-I</b> | 0.1 equiv.        | 69                       |
| 3     | <b>Int-I</b> | 0.2 equiv.        | <b>77</b>                |
| 4     | <b>Int-I</b> | <b>0.4 equiv.</b> | 70                       |
| 5     | <b>Int-I</b> | 0.5 equiv.        | 68                       |

<sup>a</sup>Reaction conditions: **4a** (0.1 mmol, 18.2 mg), PhCOOH (0.15 mmol, 18.3 mg), Selectfluor (0.25 mmol, 88.5 mg), AgNO<sub>3</sub> (x mmol), [Pd] (0.01 mmol), DCE (1 mL), room temperature, 24 h, under air, <sup>b</sup>GC yields.

### (C) Stoichiometric transformation of Int-II

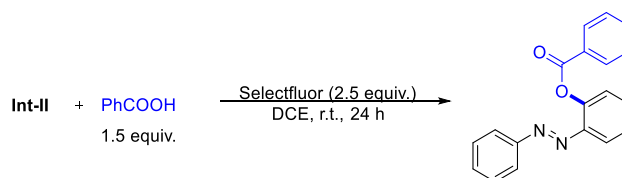

In a 10 mL test tube equipped with a stir bar, **Int-II** (39 mg, 0.1 mmol, 1.0 equiv.), PhCOOH (18.3 mg, 0.15 mmol, 1.5 equiv.), Selectfluor (88.5 mg, 0.25 mmol, 2.5 equiv.) and DCE (1.0 mL) were added successively. Then the tube was sealed and stirred at room temperature for 24 h. Upon completion, CH<sub>3</sub>COOH (0.5 mL) was added to the resulting mixture and stirred vigorously for the indicated time. The resulting acidic mixture was neutralized by NaOH aqueous, extracted with EtOAc and separated.

The organic layer was filtered, the yield was determined by GC (82% yield).

#### (D) Catalytic activity of Int-II

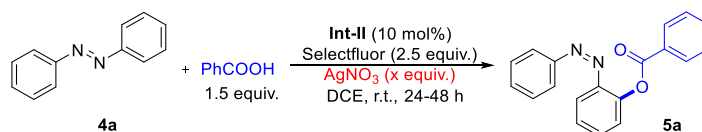

| Entry | [Pd]          | $\text{AgNO}_3$   | Yield of <b>5a</b> <sup>b</sup> |
|-------|---------------|-------------------|---------------------------------|
| 1     | <b>Int-II</b> | 0                 | 58                              |
| 2     | <b>Int-II</b> | 0.1 equiv.        | 79                              |
| 3     | <b>Int-II</b> | 0.2 equiv.        | 84                              |
| 4     | <b>Int-II</b> | <b>0.4 equiv.</b> | <b>86</b>                       |
| 5     | <b>Int-II</b> | 0.5 equiv.        | 84                              |

<sup>a</sup>Reaction conditions: **4a** (0.1 mmol, 18.2 mg), PhCOOH (0.15 mmol, 18.3 mg), Selectfluor (0.25 mmol, 88.5 mg),  $\text{AgNO}_3$  (x mmol), [Pd] (0.01 mmol), DCE (1 mL), room temperature, 24 h, under air,

<sup>b</sup>GC yields.

#### (E) Kinetic study for the oxidation of azobenzene with benzoic acid

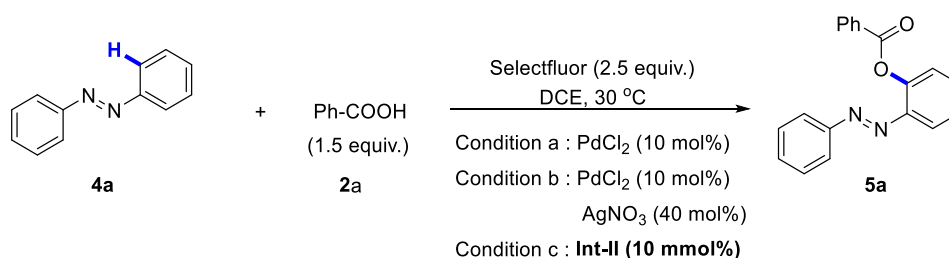

Reaction condition : In a 10 mL test tube equipped with a stir bar, **4a** (54.6 mg, 0.3 mmol, 1.0 equiv.), PhCOOH (54.9 mg, 0.45 mmol, 1.5 equiv.), Selectfluor (265.2 mg, 0.2 mmol, 2.5 equiv.) and DCE (3 mL) [a]  $\text{PdCl}_2$  (5.3 mg, 0.03 mmol, 10 mmol%), [b]  $\text{PdCl}_2$  (5.3 mg, 0.03 mmol, 10 mmol%),  $\text{AgNO}_3$  (10.2 mg, 0.12 mmol, 40 mmol%) [c] **Int-II** (11.7 mg, 0.03 mmol, 10 mmol%) were added successively. Then the tube was sealed and stirred at 30 °C oil bath for the indicated time. The resulting mixture diluted with EtOAc and filtered, followed by GC experiments. The data of kinetic curves from reaction a, b and c are included below. Each data point is an average of three independent GC injections using biphenyl as an internal standard.

**Table S5.** Kinetic study for the oxidation of azobenzene with benzoic acid

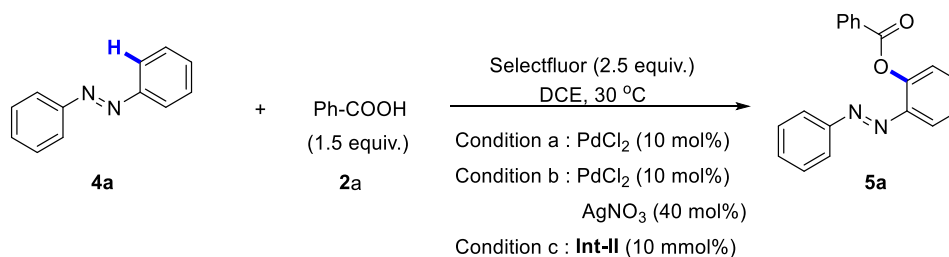



| Time / min. | Conv. / % (GC) |      |      |
|-------------|----------------|------|------|
|             | a              | b    | c    |
| 5           | 0              | 0    | 0    |
| 10          | 0              | 0    | 1.4  |
| 20          | 0              | 4.5  | 2.4  |
| 30          | 0              | 20.5 | 5.2  |
| 60          | 0              | 30.3 | 10.6 |
| 90          | 0              | 36.8 | 12.2 |
| 150         | 0              | 40.1 | 19   |
| 210         | 0              | 43.7 | 23.5 |
| 330         | 0              | 46.3 | 31   |
| 450         | 0              | 50.8 | 39.2 |
| 570         | 0              | 56.4 | 48.5 |
| 750         | 0              | 61.4 | 55.8 |
| 930         | 1.4            | 64.3 | 56.8 |

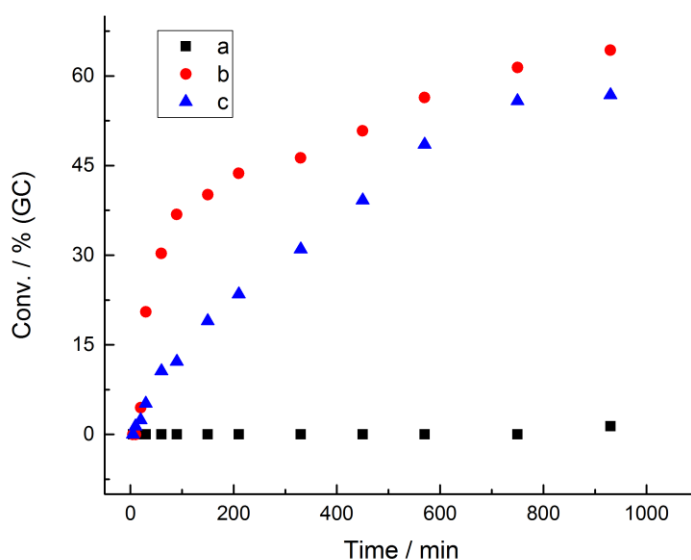

**Figure S1** Kinetic plots for the oxidation reaction of **4a**

As shown in Figure S1, the time-conversion curves of oxidation reaction displayed a lack of induction period, indicating that the palladacycle complex **Int-II** might be involved in the catalytic cycle.

## VI. Computational Studies

### Computational Details

All calculations were carried out with Gaussian 16 program.<sup>2</sup> The geometry optimizations were performed at the B3LYP<sup>3</sup>/BSI level. In the basis set BSI, the 6-31G(d) basis set was considered for all nonmetallic atoms, and the Stuttgart/Dresden effective core potential (ECP) together with associated

basis set (MWB28)<sup>4</sup> was used for Pd atom. Each optimized structure was subsequently analyzed by harmonic vibration frequencies at the same level to characterize a minimum without imaginary frequency ( $N_{\text{imag}} = 0$ ) or a transition state with only one imaginary frequency ( $N_{\text{imag}} = 1$ ) and to obtain the thermodynamic corrections to Gibbs free energy. The connection of transition states was generally confirmed via intrinsic reaction coordinate (IRC) calculations, while some of transition states were confirmed to connect corresponding minima via separate geometrical optimization along with the reaction coordinates due to the failure in IRC following (Figures S3-S5 and S7-S10). All the structures were optimized without any symmetry restrictions. The subsequent single-point calculations were carried out at the level of M06<sup>5</sup>/BSII together with SMD model<sup>6</sup> for considering the dichloroethane (DCE) solvation effect. Gibbs free energies in solution described in the study were obtained from such single-point calculations, including gas-phase free energy corrections.

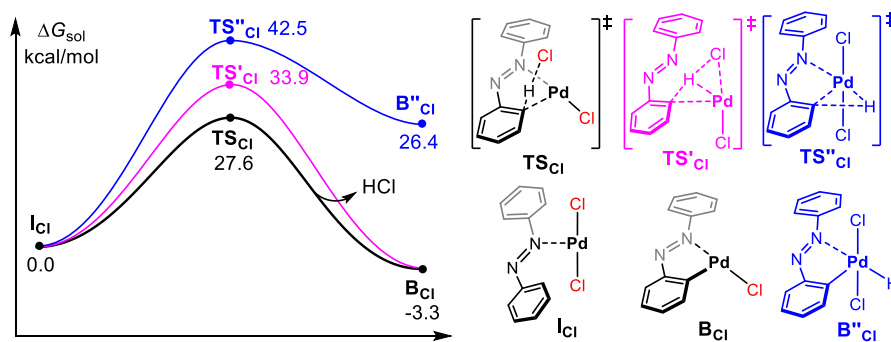

**Fig. S2** Compared different processes of C–H activation of **4a** catalyzed by PdCl<sub>2</sub>. The free energies are given in kcal/mol.

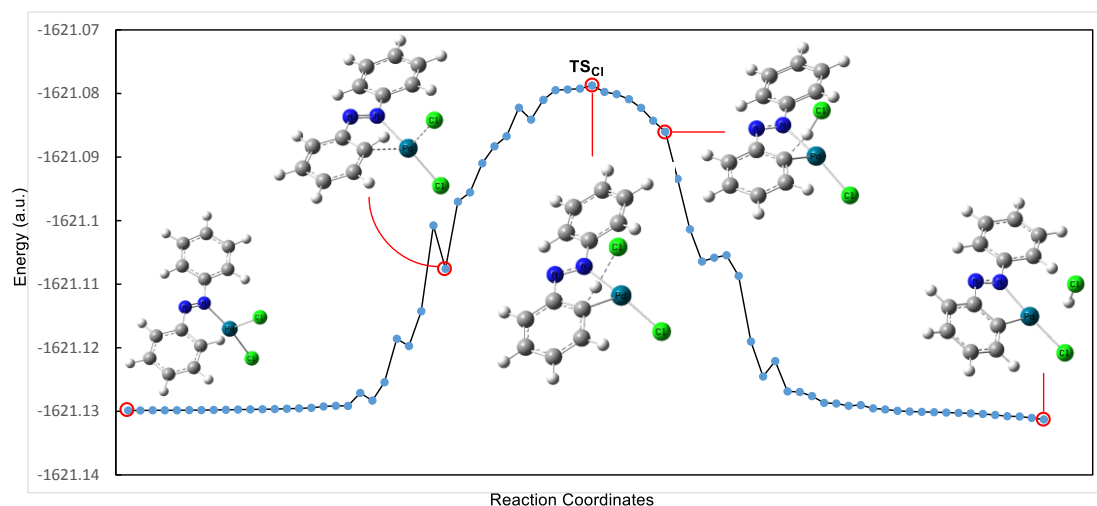

**Fig. S3** Geometrical optimization curves along with the reaction coordinates at the both sides of transition state TS<sub>Cl</sub>. It is shown that such optimizations can reach the corresponding reactants and products.

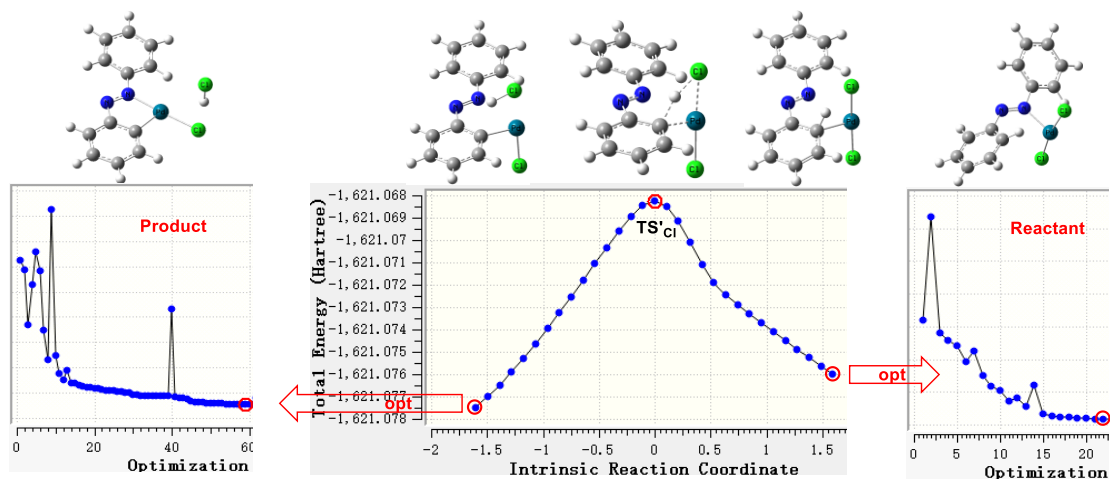

**Fig. S4** IRC calculations of  $TS'_{Cl}$  and the geometrical optimization curves along with the reaction coordinates at the both sides. It is shown that such optimizations can reach the corresponding reactants and products.

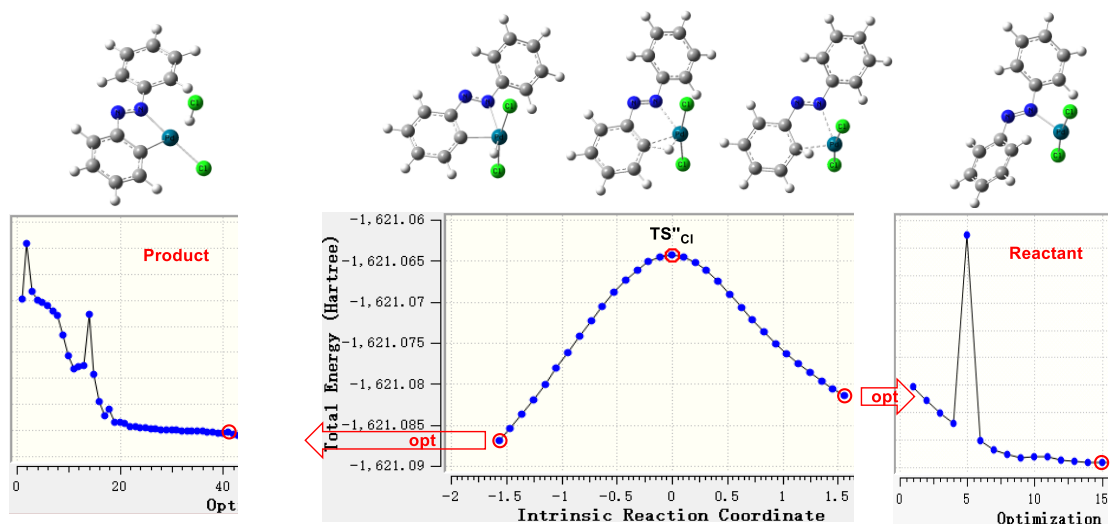

**Fig. S5** IRC calculations of  $TS''_{Cl}$  and the geometrical optimization curves along with the reaction coordinates at the both sides. It is shown that such optimizations can reach the corresponding reactants and products.

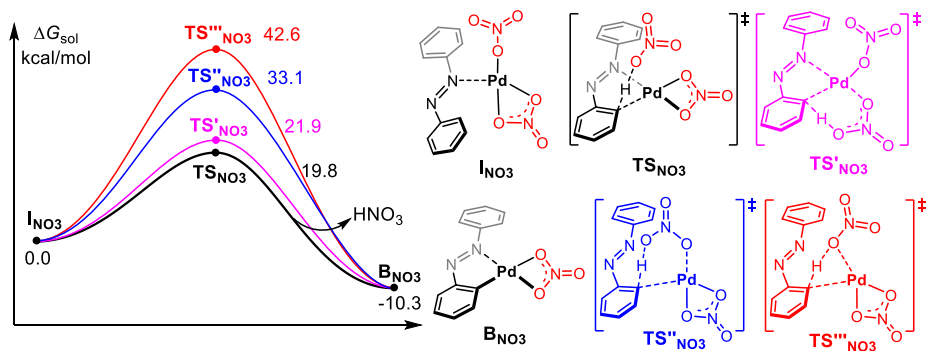

**Fig. S6** Compared different processes of C–H activation of **4a** catalyzed by  $Pd(NO_3)_2$ . The free energies are given in kcal/mol.

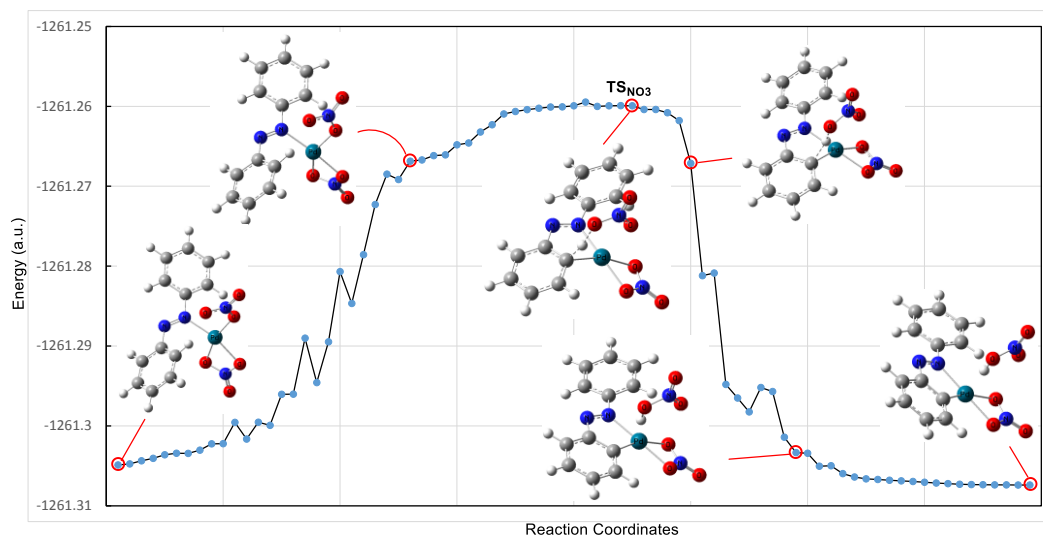

**Fig. S7** Geometrical optimization curves along with the reaction coordinates at the both sides of transition state  $TS_{Cl}$ . It is shown that such optimizations can reach the corresponding reactants and products.

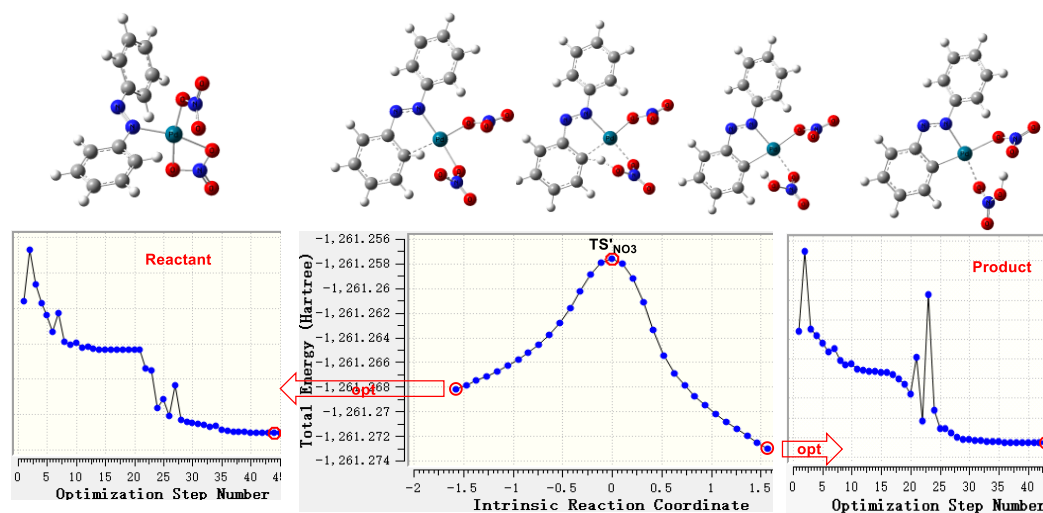

**Fig. S8** IRC calculations of  $TS'_{NO3}$  and the geometrical optimization curves along with the reaction coordinates at the both sides. It is shown that such optimizations can reach the corresponding reactants and products.

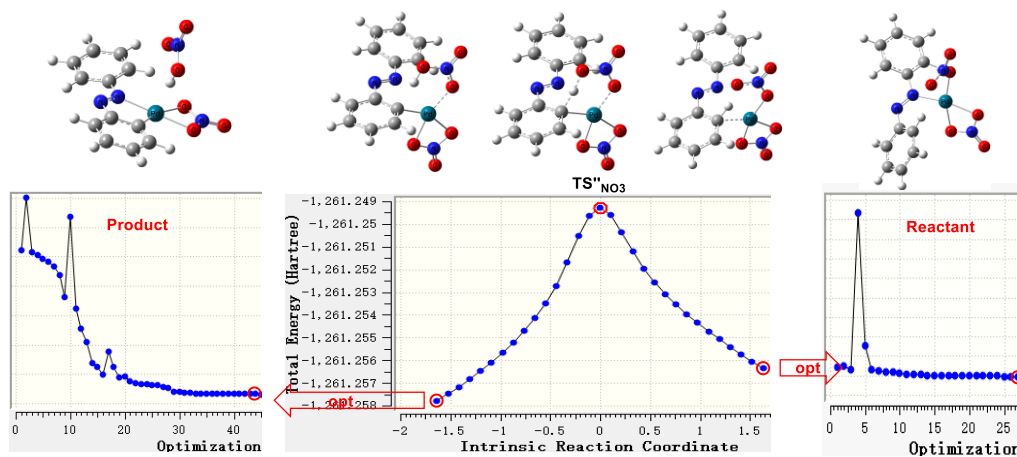

**Fig. S9** IRC calculations of  $TS''_{NO3}$  and the geometrical optimization curves along with the reaction

coordinates at the both sides. It is shown that such optimizations can reach the corresponding reactants and products.

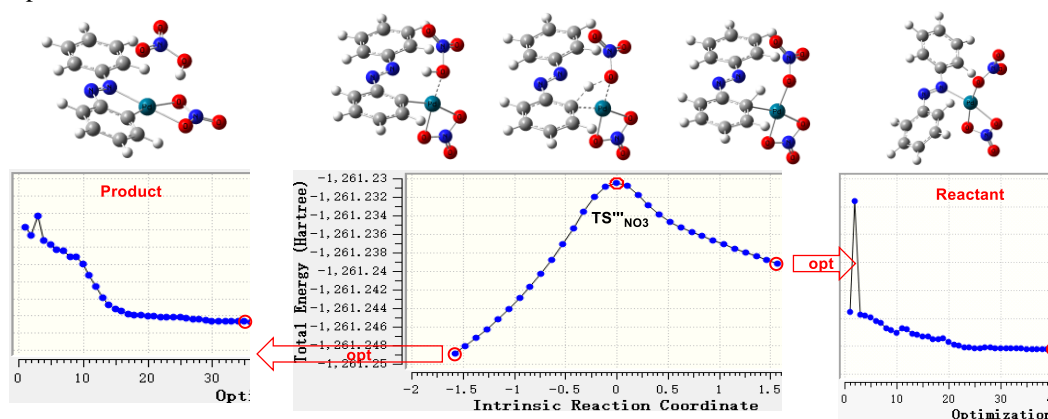

**Fig. S10** IRC calculations of  $TS'''_{NO_3}$  and the geometrical optimization curves along with the reaction coordinates at the both sides. It is shown that such optimizations can reach the corresponding reactants and products.

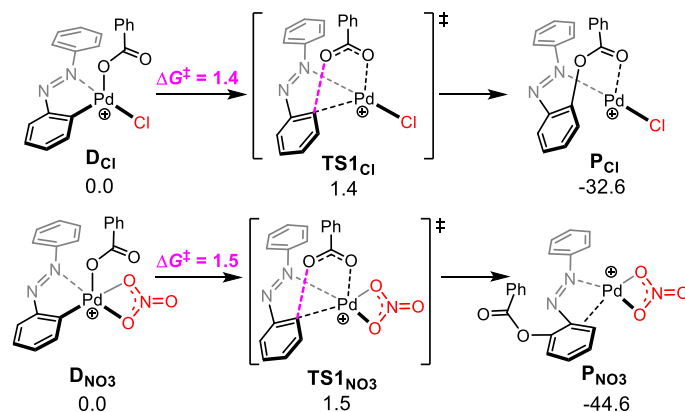

**Fig. S11** Computed reductive elimination processes (C–O bond coupling) of the species  $D_{Cl}$  and  $D_{NO_3}$ . The relative free energies and energy barriers are given in kcal/mol.

## VII. Characterization of the products

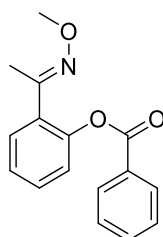

**(Z)-2-(1-(methoxyimino)ethyl)phenyl benzoate (3a)**: Colorless oil (70%, 56.5 mg);  $R_f = 0.22$  (petroleum ether-EtOAc = 30:1);  $^1H$  NMR (500 MHz,  $CDCl_3$ )  $\delta = 8.25-8.19$  (m, 2H), 7.69-7.62 (m, 1H), 7.57-7.49 (m, 3H), 7.44 (td,  $J_1 = 7.8$  Hz,  $J_2 = 1.7$  Hz, 1H), 7.32 (td,  $J_1 = 7.6$  Hz,  $J_2 = 1.3$  Hz, 1H), 7.29-7.22 (m, 1H), 3.76 (s, 3H), 2.17 (s, 3H) ppm;  $^{13}C$  NMR (126 MHz,  $CDCl_3$ )  $\delta = 165.1, 153.2, 148.3, 133.6, 130.4, 130.3$  (2C), 129.7, 129.6, 129.5, 128.6 (2C), 126.1, 123.4, 61.7, 15.1 ppm; HRMS

(ESI-TOF) for  $C_{16}H_{15}NO_3$ ; calcd.  $[M+Na]^+$  292.0944; found: 292.0948.

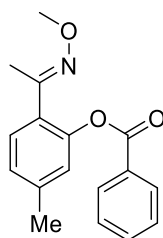

**(Z)-2-(1-(methoxyimino)ethyl)-5-methylphenyl benzoate (3b):** Colorless oil (80%, 67.9 mg);  $R_f = 0.22$  (petroleum ether-EtOAc = 30:1);  $^1H$  NMR (500 MHz,  $CDCl_3$ )  $\delta = 8.26-8.16$  (m, 2H), 7.72-7.58 (m, 1H), 7.56-7.49 (m, 2H), 7.40 (d,  $J = 7.9$  Hz, 1H), 7.15-7.10 (m, 1H), 7.07 (s, 1H), 3.73 (s, 3H), 2.41 (s, 3H), 2.16 (s, 3H) ppm;  $^{13}C$  NMR (126 MHz,  $CDCl_3$ )  $\delta = 164.3, 151.9, 147.5, 139.6, 133.4, 129.5$  (2C), 129.0, 128.8, 128.4 (2C), 126.9, 126.4, 123.6, 60.9, 20.5, 14.4 ppm; HRMS (ESI-TOF) for  $C_{17}H_{17}NO_3$ ; calcd.  $[M+Na]^+$  306.1101; found: 306.1104.

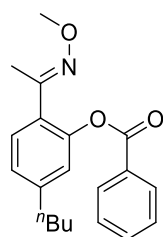

**(Z)-5-butyl-2-(1-(methoxyimino)ethyl)phenyl benzoate (3c):** Brown oil (80%, 78.3 mg);  $R_f = 0.29$  (petroleum ether-EtOAc = 30:1);  $^1H$  NMR (500 MHz,  $CDCl_3$ )  $\delta = 8.22-8.17$  (m, 2H), 7.63 (ddt,  $J_1 = 8.8$  Hz,  $J_2 = 7.1$  Hz,  $J_3 = 1.4$  Hz, 1H), 7.54-7.46 (m, 2H), 7.39 (d,  $J = 7.9$  Hz, 1H), 7.11 (dd,  $J_1 = 7.9$  Hz,  $J_2 = 1.7$  Hz, 1H), 7.04 (d,  $J = 1.7$  Hz, 1H), 3.71 (s, 3H), 2.72-2.57 (m, 2H), 2.13 (s, 3H), 1.61 (m, 2H), 1.41-1.33 (m, 2H), 0.92 (t,  $J = 7.3$  Hz, 3H) ppm;  $^{13}C$  NMR (126 MHz,  $CDCl_3$ )  $\delta = 165.1, 153.2, 148.1, 145.2, 133.5, 130.2$  (2C), 129.7, 129.2, 128.5 (2C), 127.6, 126.2, 123.2, 61.6, 35.2, 33.2, 22.2, 15.0, 13.9 ppm; HRMS (ESI-TOF) for  $C_{20}H_{23}NO_3$ ; calcd.  $[M+Na]^+$  348.1570; found: 348.1573.

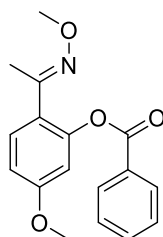

**(Z)-5-methoxy-2-(1-(methoxyimino)ethyl)phenyl benzoate (3d):** Yellow solid (90%, 80.7 mg);  $R_f = 0.25$  (petroleum ether-EtOAc = 20:1);  $^1H$  NMR (500 MHz,  $CDCl_3$ )  $\delta = 8.22-8.18$  (m, 2H), 7.69-7.61 (m, 1H), 7.56-7.49 (m, 2H), 7.43 (d,  $J = 8.7$  Hz, 1H), 6.86 (dd,  $J_1 = 8.7$  Hz,  $J_2 = 2.6$  Hz, 1H), 6.78 (d,  $J = 2.6$  Hz, 1H), 3.84 (s, 3H), 3.70 (s, 3H), 2.14 (s, 3H) ppm;  $^{13}C$  NMR (126 MHz,  $CDCl_3$ )  $\delta = 165.0, 160.7, 152.9, 149.3, 133.6, 130.3$  (2C), 130.1, 129.6, 128.6 (2C), 122.9, 112.1, 109.0, 61.6, 55.6, 15.0 ppm; HRMS (ESI-TOF) for  $C_{17}H_{17}NO_4$ ; calcd.  $[M+Na]^+$  322.0554; found: 322.1057.

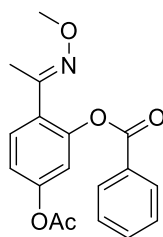

**(Z)-5-acetoxy-2-(1-(methoxyimino)ethyl)phenyl benzoate (3e):** White solid (85%, 83.4 mg, E/Z = 19:1);  $R_f = 0.20$  (petroleum ether-EtOAc = 20:1); Major *E*-isomer:  $^1\text{H}$  NMR (500 MHz,  $\text{CDCl}_3$ )  $\delta = 8.25\text{--}8.16$  (m, 2H), 7.98 (dd,  $J_1 = 8.0$  Hz,  $J_2 = 1.6$  Hz, 1H), 7.92 (d,  $J = 1.6$  Hz, 1H), 7.70-7.63 (m, 1H), 7.59 (d,  $J = 8.1$  Hz, 1H), 7.53 (t,  $J = 7.8$  Hz, 2H), 3.94 (s, 3H), 3.76 (s, 3H), 2.17 (s, 3H) ppm;  $^{13}\text{C}$  NMR (126 MHz, DMSO)  $\delta = 164.8, 164.2, 151.6, 147.6, 134.1, 133.8, 130.8, 129.7$  (2C), 129.6, 128.6 (2C), 128.5, 126.6, 124.2, 61.3, 52.1, 14.4 ppm; HRMS (ESI-TOF) for  $\text{C}_{18}\text{H}_{17}\text{NO}_5$ : calcd.  $[\text{M}+\text{Na}]^+$  350.0999; found: 350.1003.

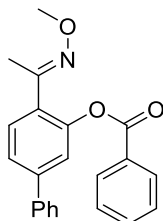

**(Z)-4-(1-(methoxyimino)ethyl)-[1,1'-biphenyl]-3-yl benzoate (3f):** White solid (60%, 62.1 mg);  $R_f = 0.24$  (petroleum ether-EtOAc = 30:1);  $^1\text{H}$  NMR (500 MHz,  $\text{CDCl}_3$ )  $\delta = 8.32\text{--}8.18$  (m, 2H), 7.71-7.61 (m, 3H), 7.60 (d,  $J = 8.1$  Hz, 1H), 7.59-7.52 (m, 3H), 7.52-7.44 (m, 3H), 7.43-7.36 (m, 1H), 3.77 (s, 3H), 2.22 (s, 3H) ppm;  $^{13}\text{C}$  NMR (126 MHz,  $\text{CDCl}_3$ )  $\delta = 165.1, 152.9, 148.6, 143.0, 139.5, 133.6, 130.3$  (2C), 129.8, 129.5, 129.0, 128.8 (2C), 128.6 (2C), 127.9, 127.1 (2C), 124.7, 122.0, 61.7, 14.9 ppm; HRMS (ESI-TOF) for  $\text{C}_{22}\text{H}_{19}\text{NO}_3$ : calcd.  $[\text{M}+\text{Na}]^+$  368.1257; found: 368.1259.

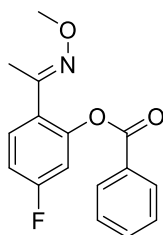

**(Z)-5-fluoro-2-(1-(methoxyimino)ethyl)phenyl benzoate (3g):** Colorless oil (86%, 74.0 mg, E/Z = 20:1);  $R_f = 0.27$  (petroleum ether-EtOAc = 30:1); Major *E*-isomer:  $^1\text{H}$  NMR (500 MHz,  $\text{CDCl}_3$ )  $\delta = 8.21$  (dd,  $J_1 = 8.2$  Hz,  $J_2 = 1.3$  Hz, 2H), 7.76-7.62 (m, 1H), 7.58-7.42 (m, 3H), 7.14-6.91 (m, 2H), 3.75 (s, 3H), 2.16 (s, 3H) ppm;  $^{13}\text{C}$  NMR (126 MHz,  $\text{CDCl}_3$ )  $\delta = 164.6, 162.7$  (d,  $J = 250.2$  Hz), 152.4, 149.2 (d,  $J = 11.0$  Hz), 133.8, 130.5 (d,  $J = 9.4$  Hz), 130.3 (2C), 129.1, 128.6 (2C), 126.8 (d,  $J = 3.7$  Hz), 113.2 (d,  $J = 21.3$  Hz), 111.3 (d,  $J = 24.5$  Hz), 61.7, 15.1 ppm; HRMS (ESI-TOF) for  $\text{C}_{16}\text{H}_{14}\text{FNO}_3$ : calcd.  $[\text{M}+\text{Na}]^+$  310.0850; found: 310.0853.

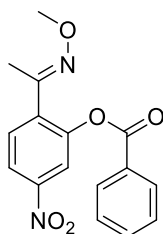

**(Z)-2-(1-(methoxyimino)ethyl)-5-nitrophenyl benzoate (3h):** White solid (48%, 45.2 mg);  $R_f = 0.25$  (petroleum ether-EtOAc = 20:1);  $^1\text{H}$  NMR (500 MHz,  $\text{CDCl}_3$ )  $\delta = 8.21$  (d,  $J = 1.3$  Hz, 1H), 8.20 (d,  $J = 1.4$  Hz, 1H), 8.17 (dd,  $J_1 = 8.5$  Hz,  $J_2 = 2.3$  Hz, 1H), 8.15 (d,  $J = 2.2$  Hz, 1H), 7.73-7.66 (m, 2H), 7.59-7.52 (m, 2H), 3.78 (s, 3H), 2.19 (s, 3H) ppm;  $^{13}\text{C}$  NMR (126 MHz,  $\text{CDCl}_3$ )  $\delta = 164.5, 151.6, 148.6, 148.0, 136.8, 134.1, 130.3$  (2C), 130.2, 128.7 (2C), 128.6, 120.9, 119.3, 62.1, 14.8 ppm; HRMS (ESI-TOF) for  $\text{C}_{16}\text{H}_{14}\text{N}_2\text{O}_5$ : calcd.  $[\text{M}+\text{Na}]^+$  337.0795; found: 337.0790

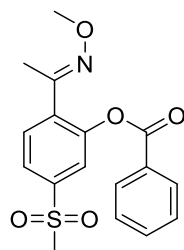

**(E)-2-(1-(methoxyimino)ethyl)-5-(methylsulfonyl)phenyl benzoate (3i):** Pale yellow solid (66%, 69.2 mg);  $R_f = 0.33$  (petroleum ether-EtOAc = 3:1);  $^1\text{H NMR}$  (500 MHz,  $\text{CDCl}_3$ )  $\delta = 8.25\text{--}8.14$  (m, 2H), 7.87 (dd,  $J_1 = 8.1$  Hz,  $J_2 = 1.8$  Hz, 1H), 7.84 (d,  $J = 1.8$  Hz, 1H), 7.71 (d,  $J = 8.1$  Hz, 1H), 7.71-7.64 (m, 1H), 7.54 (t,  $J = 7.8$  Hz, 2H), 3.77 (s, 3H), 3.10 (s, 3H), 2.18 (s, 3H) ppm;  $^{13}\text{C NMR}$  (126 MHz,  $\text{CDCl}_3$ )  $\delta = 164.6, 151.9, 148.7, 141.5, 135.9, 134.1, 130.7, 130.3$  (2C), 128.8 (2C), 128.7, 124.8, 123.0, 62.1, 44.5, 14.9 ppm; HRMS (ESI-TOF) for  $\text{C}_{17}\text{H}_{17}\text{NO}_5\text{S}$ : calcd.  $[\text{M}+\text{Na}]^+$  370.0720; found: 370.0726.

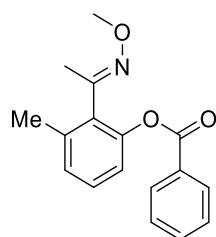

**(E)-2-(1-(methoxyimino)ethyl)phenyl benzoate (3j):** Pale yellow oil (79%, 67.0 mg, E/Z = 20:1);  $R_f = 0.22$  (petroleum ether-EtOAc = 30:1); major *E*-isomer:  $^1\text{H NMR}$  (500 MHz,  $\text{CDCl}_3$ )  $\delta = 8.17$  (dd,  $J_1 = 8.3$  Hz,  $J_2 = 1.4$  Hz, 2H), 7.69-7.62 (m, 1H), 7.52 (t,  $J = 7.8$  Hz, 2H), 7.32 (t,  $J = 7.9$  Hz, 1H), 7.16 (d,  $J = 7.7$  Hz, 1H), 7.12 (d,  $J = 8.1$  Hz, 1H), 3.84 (s, 3H), 2.36 (s, 3H), 2.09 (s, 3H) ppm;  $^{13}\text{C NMR}$  (126 MHz,  $\text{CDCl}_3$ )  $\delta = 165.0, 153.0, 148.8, 138.0, 133.6, 130.5, 130.1$  (2C), 129.5, 129.0, 128.6 (2C), 127.9, 120.2, 61.7, 19.5, 16.1 ppm; HRMS (ESI-TOF) for  $\text{C}_{17}\text{H}_{17}\text{NO}_3$ : calcd.  $[\text{M}+\text{Na}]^+$  306.1101; found: 306.1094.

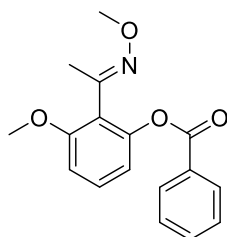

**(Z)-3-methoxy-2-(1-(methoxyimino)ethyl)phenyl benzoate (3k):** Pale yellow oil (90%, 80.7 mg);  $R_f = 0.25$  (petroleum ether-EtOAc = 20:1);  $^1\text{H NMR}$  (500 MHz,  $\text{CDCl}_3$ )  $\delta = 8.25\text{--}8.13$  (m, 2H), 7.72-7.59 (m, 1H), 7.55-7.48 (m, 2H), 7.37 (t,  $J = 8.3$  Hz, 1H), 6.91 (dd,  $J_1 = 8.2$  Hz,  $J_2 = 1.0$  Hz, 1H), 6.86 (dd,  $J_1 = 8.4$  Hz,  $J_2 = 1.0$  Hz, 1H), 3.86 (s, 3H), 3.72 (s, 3H), 2.12 (s, 3H) ppm;  $^{13}\text{C NMR}$  (126 MHz,  $\text{CDCl}_3$ )  $\delta = 165.0, 158.5, 151.4, 149.1, 133.4, 130.1$  (2C), 129.7, 129.5, 128.4 (2C), 120.4, 115.1, 108.6, 61.5, 55.9, 15.7 ppm; HRMS (ESI-TOF) for  $\text{C}_{17}\text{H}_{17}\text{NO}_4$ : calcd.  $[\text{M}+\text{Na}]^+$  322.0554; found: 322.0726.

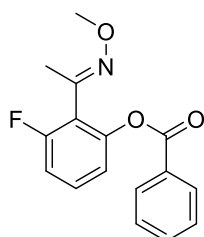



**(Z)-3-fluoro-2-(1-(methoxyimino)ethyl)phenyl benzoate (3l):** Colorless oil (73%, 62.9 mg, E/Z = 20:1);  $R_f = 0.22$  (petroleum ether-EtOAc = 30:1); Major (E-isomer):  $^1\text{H NMR}$  (500 MHz,  $\text{CDCl}_3$ )  $\delta = 8.18$  (dd,  $J_1 = 8.4$  Hz,  $J_2 = 1.4$  Hz, 2H), 7.70-7.62 (m, 1H), 7.56-7.50 (m, 2H), 7.42-7.37 (m, 1H), 7.13-7.03 (m, 2H), 3.71 (s, 3H), 2.16 (d,  $J = 1.8$  Hz, 3H) ppm;  $^{13}\text{C NMR}$  (126 MHz,  $\text{CDCl}_3$ )  $\delta = 164.9$ , 161.0 (d,  $J = 249.4$  Hz), 149.2 (d,  $J = 6.3$  Hz), 148.9, 133.7, 130.3 (2C), 129.9 (d,  $J = 10.0$  Hz), 129.2, 128.6 (2C), 120.0 (d,  $J = 17.7$  Hz), 118.9 (d,  $J = 3.4$  Hz), 113.5 (d,  $J = 22.0$  Hz), 61.8, 15.8 (d,  $J = 3.0$  Hz) ppm; HRMS (ESI-TOF) for  $\text{C}_{16}\text{H}_{14}\text{FNO}_3$ : calcd.  $[\text{M}+\text{Na}]^+$  310.0857; found: 310.0850.

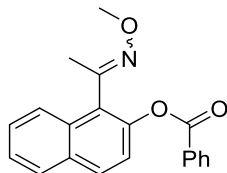

**(E)-3-(1-(methoxyimino)ethyl)naphthalen-2-yl benzoate (3m):** Pale yellow solid (65%, 62.2 mg, E/Z = 10:1);  $R_f = 0.22$  (petroleum ether-EtOAc = 30:1); Major (E-isomer):  $^1\text{H NMR}$  (500 MHz,  $\text{CDCl}_3$ )  $\delta = 8.31$ -8.25 (m, 2H), 8.00 (s, 1H), 7.91 (d,  $J = 7.2$  Hz, 1H), 7.83 (d,  $J = 7.2$  Hz, 1H), 7.73 (s, 1H), 7.71-7.64 (m, 1H), 7.59-7.48 (m, 4H), 3.77 (s, 3H), 2.28 (s, 3H) ppm;  $^{13}\text{C NMR}$  (126 MHz,  $\text{CDCl}_3$ )  $\delta = 165.3$ , 153.4, 146.0, 133.6, 133.6, 131.3, 130.3 (2C), 129.7, 129.7, 129.4, 128.6 (2C), 128.1, 127.3, 127.2, 126.2, 120.8, 61.8, 15.2 ppm; HRMS (ESI-TOF) for  $\text{C}_{20}\text{H}_{17}\text{NO}_3$ : calcd.  $[\text{M}+\text{Na}]^+$  342.1101; found: 342.1103.

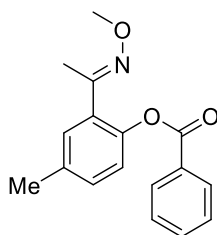

**(Z)-2-(1-(methoxyimino)ethyl)-4-methylphenyl benzoate (3n):** Pale yellow oil (81%, 68.8 mg);  $R_f = 0.22$  (petroleum ether-EtOAc = 30:1);  $^1\text{H NMR}$  (600 MHz,  $\text{CDCl}_3$ )  $\delta = 8.19$  (dd,  $J_1 = 8.3$  Hz,  $J_2 = 1.4$  Hz, 2H), 7.65-7.58 (m, 1H), 7.53-7.46 (m, 2H), 7.28 (d,  $J = 2.3$  Hz, 1H), 7.22-7.19 (m, 1H), 7.10 (d,  $J = 8.2$  Hz, 1H), 3.75 (s, 3H), 2.38 (s, 3H), 2.13 (s, 3H) ppm;  $^{13}\text{C NMR}$  (151 MHz,  $\text{CDCl}_3$ )  $\delta = 165.3$ , 153.5, 146.1, 135.8, 133.6, 130.4, 130.3 (2C), 130.0, 129.9, 129.6, 128.6 (2C), 123.1, 61.7, 20.9, 15.2 ppm; HRMS (ESI-TOF) for  $\text{C}_{17}\text{H}_{17}\text{NO}_3$ : calcd.  $[\text{M}+\text{Na}]^+$  306.1101; found: 306.1102.

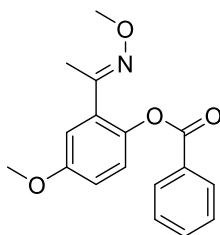

**(Z)-4-methoxy-2-(1-(methoxyimino)ethyl)phenyl benzoate (3o):** Pale yellow oil (91%, 81.6 mg);  $R_f = 0.25$  (petroleum ether-EtOAc = 20:1);  $^1\text{H NMR}$  (500 MHz,  $\text{CDCl}_3$ )  $\delta = 8.24$ -8.17 (m, 2H), 7.69-7.61 (m, 1H), 7.52 (t,  $J = 7.8$  Hz, 2H), 7.15 (d,  $J = 8.9$  Hz, 1H), 7.02 (d,  $J = 3.0$  Hz, 1H), 6.96 (dd,  $J_1 = 8.8$  Hz,  $J_2 = 3.1$  Hz, 1H), 3.86 (s, 3H), 3.77 (s, 3H), 2.15 (s, 3H) ppm;  $^{13}\text{C NMR}$  (126 MHz,  $\text{CDCl}_3$ )  $\delta = 165.4$ , 157.3, 153.2, 141.7, 133.5, 131.1, 130.2 (2C), 129.6, 128.5 (2C), 124.2, 115.0, 114.4, 61.7, 55.7, 15.0 ppm; HRMS (ESI-TOF) for  $\text{C}_{17}\text{H}_{17}\text{NO}_4$ : calcd.  $[\text{M}+\text{Na}]^+$  322.0554; found: 322.1056.

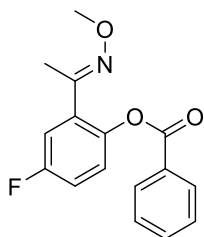

**(Z)-4-fluoro-2-(1-(methoxyimino)ethyl)phenyl benzoate (3p):** Pale yellow oil (60%, 51.7 mg, E/Z = 15:1);  $R_f = 0.22$  (petroleum ether-EtOAc = 30:1); *Major (E-isomer):*  $^1\text{H NMR}$  (500 MHz,  $\text{CDCl}_3$ )  $\delta = 8.32\text{--}8.15$  (m, 2H), 7.66 (m, 1H), 7.53 (t,  $J = 7.8$  Hz, 2H), 7.26–7.17 (m, 2H), 7.17–7.08 (m, 1H), 3.76 (s, 3H), 2.15 (s, 3H) ppm;  $^{13}\text{C NMR}$  (126 MHz,  $\text{CDCl}_3$ )  $\delta = 164.0, 155.0$  (d,  $J = 249.3$  Hz), 152.3 (d,  $J = 2.8$  Hz), 136.4 (d,  $J = 14.2$  Hz), 133.8, 132.8, 130.5 (2C), 128.8, 128.6 (2C), 126.7 (d,  $J = 8.0$  Hz), 124.4 (d,  $J = 3.5$  Hz), 116.8 (d,  $J = 19.0$  Hz), 61.9, 14.9 ppm; HRMS (ESI-TOF) for  $\text{C}_{16}\text{H}_{14}\text{FNO}_3$ : calcd.  $[\text{M}+\text{Na}]^+$  310.0850; found: 310.0858.

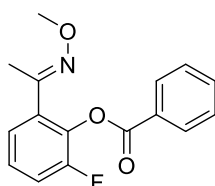

**(Z)-2-fluoro-6-(1-(methoxyimino)ethyl)phenyl benzoate (3p')**: Pale yellow oil (30%, 25.8 mg);  $R_f = 0.22$  (petroleum ether-EtOAc = 30:1);  $^1\text{H NMR}$  (500 MHz,  $\text{CDCl}_3$ )  $\delta = 8.32\text{--}8.15$  (m, 2H), 7.66 (m, 1H), 7.53 (t,  $J = 7.8$  Hz, 2H), 7.26–7.17 (m, 2H), 7.17–7.08 (m, 1H), 3.76 (s, 3H), 2.15 (s, 3H) ppm;  $^{13}\text{C NMR}$  (126 MHz,  $\text{CDCl}_3$ )  $\delta = 165.1, 160.1$  (d,  $J = 245.4$  Hz), 152.2 (d,  $J = 1.8$  Hz), 144.1 (d,  $J = 2.9$  Hz), 133.7, 131.9 (d,  $J = 8.0$  Hz), 130.3 (2C), 129.3, 128.6 (2C), 124.9 (d,  $J = 8.7$  Hz), 116.3 (d,  $J = 23.3$  Hz), 116.1 (d,  $J = 24.5$  Hz), 61.9, 14.8 ppm; HRMS (ESI-TOF) for  $\text{C}_{16}\text{H}_{14}\text{FNO}_3$ : calcd.  $[\text{M}+\text{Na}]^+$  310.0850; found: 310.0853.

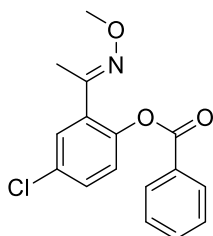

**(Z)-4-chloro-2-(1-(methoxyimino)ethyl)phenyl benzoate (3q):** Pale yellow oil (86%, 78.2 mg);  $R_f = 0.38$  (petroleum ether-EtOAc = 30:1);  $^1\text{H NMR}$  (500 MHz,  $\text{CDCl}_3$ )  $\delta = 8.23\text{--}8.16$  (m, 2H), 7.70–7.62 (m, 1H), 7.57–7.48 (m, 3H), 7.39 (dd,  $J_1 = 8.6$  Hz,  $J_2 = 2.6$  Hz, 1H), 7.19 (d,  $J = 8.7$  Hz, 1H), 3.77 (s, 3H), 2.15 (s, 3H) ppm;  $^{13}\text{C NMR}$  (126 MHz,  $\text{CDCl}_3$ )  $\delta = 164.8, 152.1, 146.8, 133.8, 131.9, 131.5, 130.3$  (2C), 129.6, 129.4, 129.2, 128.6 (2C), 124.8, 61.9, 14.9 ppm; HRMS (ESI-TOF) for  $\text{C}_{16}\text{H}_{14}\text{ClNO}_3$ : calcd.  $[\text{M}+\text{Na}]^+$  326.0554; found: 326.0556.

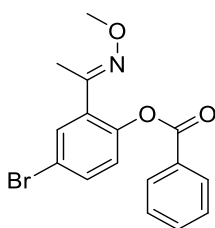

**(Z)-4-bromo-2-(1-(methoxyimino)ethyl)phenyl benzoate (3r):** Yellow oil (80%, 83.3 mg);  $R_f = 0.38$

(petroleum ether-EtOAc = 30:1);  $^1\text{H}$  NMR (500 MHz,  $\text{CDCl}_3$ )  $\delta$  = 8.20 (dd,  $J_1$  = 8.3 Hz,  $J_2$  = 1.3 Hz, 2H), 7.70-7.63 (m, 2H), 7.57-7.49 (m, 3H), 7.13 (d,  $J$  = 8.6 Hz, 1H), 3.77 (s, 3H), 2.14 (s, 3H) ppm;  $^{13}\text{C}$  NMR (126 MHz,  $\text{CDCl}_3$ )  $\delta$  = 164.7, 152.0, 147.4, 133.8, 132.5, 132.3 (2C), 130.3 (2C), 129.1, 128.6 (2C), 125.1, 119.1, 61.9, 14.9 ppm; HRMS (ESI-TOF) for  $\text{C}_{16}\text{H}_{14}\text{BrNO}_3$ : calcd.  $[\text{M}+\text{Na}]^+$  370.0049; found: 370.0055.

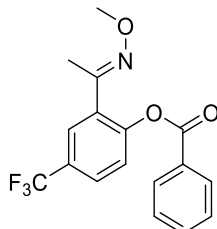

**(Z)-2-(1-(methoxyimino)ethyl)-4-(trifluoromethyl)phenyl benzoate (3s):** Colorless oil (82%, 82.9 mg);  $R_f$  = 0.40 (petroleum ether-EtOAc = 30:1);  $^1\text{H}$  NMR (500 MHz,  $\text{CDCl}_3$ )  $\delta$  = 8.24-8.19 (m, 2H), 7.80 (d,  $J$  = 2.3 Hz, 1H), 7.73-7.65 (m, 2H), 7.55 (t,  $J$  = 7.8 Hz, 2H), 7.39 (d,  $J$  = 8.4 Hz, 1H), 3.79 (s, 3H), 2.19 (s, 3H) ppm;  $^{13}\text{C}$  NMR (126 MHz,  $\text{CDCl}_3$ )  $\delta$  = 164.6, 152.1, 150.9, 134.0, 131.3, 130.4 (2C), 128.9, 128.7 (2C), 128.5 (q,  $J$  = 32.8 Hz), 126.9 (q,  $J$  = 3.7 Hz), 126.7 (q,  $J$  = 3.6 Hz), 124.2, 123.7 (q,  $J$  = 273.42 Hz), 62.0, 15.0 ppm; HRMS (ESI-TOF) for  $\text{C}_{17}\text{H}_{14}\text{F}_3\text{NO}_3$ : calcd.  $[\text{M}+\text{Na}]^+$  360.0818; found: 360.0825.

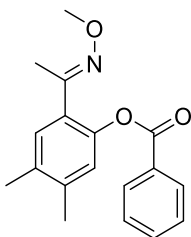

**(Z)-2-(1-(methoxyimino)ethyl)-4,5-dimethylphenyl benzoate (3t):** Pale yellow oil (83%, 74.0 mg);  $R_f$  = 0.22 (petroleum ether-EtOAc = 30:1);  $^1\text{H}$  NMR (500 MHz,  $\text{CDCl}_3$ )  $\delta$  = 8.23-8.17 (m, 2H), 7.69-7.59 (m, 1H), 7.52 (t,  $J$  = 7.8 Hz, 2H), 7.26 (s, 1H), 7.01 (s, 1H), 3.75 (s, 3H), 2.30 (s, 6H), 2.14 (s, 3H) ppm;  $^{13}\text{C}$  NMR (126 MHz,  $\text{CDCl}_3$ )  $\delta$  = 165.3, 153.4, 146.0, 138.7, 134.5, 133.4, 130.3 (2C), 130.2, 129.8, 128.5 (2C), 127.5, 124.2, 61.6, 19.7, 19.2, 15.0 ppm; HRMS (ESI-TOF) for  $\text{C}_{18}\text{H}_{19}\text{NO}_3$ : calcd.  $[\text{M}+\text{Na}]^+$  320.1257; found: 320.1264.

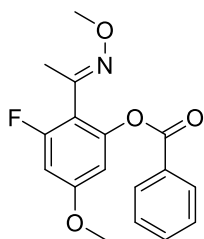

**(Z)-3-fluoro-5-methoxy-2-(1-(methoxyimino)ethyl)phenyl benzoate (3u):** Pale orange solid (80%, 76.0 mg,  $E/Z$  = 15:1);  $R_f$  = 0.40 (petroleum ether-EtOAc = 20:1); *Major (E-isomer)*:  $^1\text{H}$  NMR (500 MHz,  $\text{CDCl}_3$ )  $\delta$  = 8.21-8.12 (m, 2H), 7.70-7.62 (m, 1H), 7.52 (t,  $J$  = 7.8 Hz, 2H), 6.68-6.56 (m, 2H), 3.83 (s, 3H), 3.67 (s, 3H), 2.12 (d,  $J$  = 1.9 Hz, 3H) ppm;  $^{13}\text{C}$  NMR (126 MHz,  $\text{CDCl}_3$ )  $\delta$  = 164.8, 161.7 (d,  $J$  = 228.8 Hz), 160.7 (d,  $J$  = 5.1 Hz), 149.9 (d,  $J$  = 9.3 Hz), 149.0, 133.7, 130.3 (2C), 129.2, 128.6 (2C), 112.5 (d,  $J$  = 18.0 Hz), 105.0 (d,  $J$  = 3.0 Hz), 100.2 (d,  $J$  = 26.0 Hz), 61.7, 55.8, 15.9 (d,  $J$  = 3.4 Hz) ppm; HRMS (ESI-TOF) for  $\text{C}_{17}\text{H}_{16}\text{FNO}_4$ : calcd.  $[\text{M}+\text{Na}]^+$  349.0956; found: 349.0959.

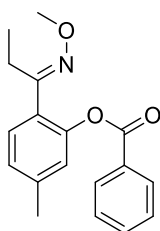

**(Z)-2-(1-(methoxyimino)propyl)-5-methylphenyl benzoate (3v):** Pale yellow oil (68%, 60.6 mg, E/Z = 15:1);  $R_f = 0.22$  (petroleum ether-EtOAc = 30:1); *Major (E-isomer):*  $^1\text{H NMR}$  (600 MHz,  $\text{CDCl}_3$ )  $\delta = 8.20\text{--}8.13$  (m, 2H), 7.68–7.58 (m, 1H), 7.50 (td,  $J_1 = 7.8$  Hz,  $J_2 = 1.5$  Hz, 2H), 7.33 (dd,  $J_1 = 7.9$  Hz,  $J_2 = 1.4$  Hz, 1H), 7.11 (t,  $J = 6.5$  Hz, 1H), 7.06 (s, 1H), 3.68 (d,  $J = 1.5$  Hz, 3H), 2.64 (q,  $J = 7.6$  Hz, 2H), 2.39 (s, 3H), 1.03 (t,  $J = 7.6$  Hz, 3H) ppm;  $^{13}\text{C NMR}$  (151 MHz,  $\text{CDCl}_3$ )  $\delta = 165.2, 158.2, 148.3, 140.1, 133.5, 130.3$  (2C), 129.7, 129.5, 128.5(2C), 126.9, 126.4, 124.0, 61.6, 22.1, 21.2, 10.6 ppm; HRMS (ESI-TOF) for  $\text{C}_{18}\text{H}_{19}\text{NO}_3$ : calcd.  $[\text{M}+\text{Na}]^+$  320.1257; found: 320.1261.

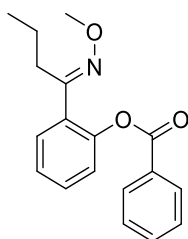

**(Z)-2-(1-(methoxyimino)butyl)phenyl benzoate (3w):** Pale yellow oil (65%, 57.9 mg, E/Z = 10:1);  $R_f = 0.22$  (petroleum ether-EtOAc = 30:1); *Major (E-isomer):*  $^1\text{H NMR}$  (500 MHz,  $\text{CDCl}_3$ )  $\delta = 8.21$  (dd,  $J_1 = 8.4$  Hz,  $J_2 = 1.3$  Hz, 2H), 7.69–7.61 (m, 1H), 7.57–7.49 (m, 2H), 7.49–7.40 (m, 2H), 7.31 (td,  $J_1 = 7.6$  Hz,  $J_2 = 1.3$  Hz, 1H), 7.30–7.24 (m, 1H), 3.72 (s, 3H), 2.68–2.62 (m, 2H), 1.57–1.45 (m, 2H), 0.89 (t,  $J = 7.4$  Hz, 3H) ppm;  $^{13}\text{C NMR}$  (126 MHz,  $\text{CDCl}_3$ )  $\delta = 165.0, 157.1, 148.5, 133.5, 130.2$  (2C), 129.8, 129.6, 129.6, 129.6, 128.5 (2C), 126.0, 123.5, 61.6, 30.7, 19.4, 14.1 ppm; HRMS (ESI-TOF) for  $\text{C}_{18}\text{H}_{19}\text{NO}_3$ : calcd.  $[\text{M}+\text{Na}]^+$  320.1257; found: 320.1300.

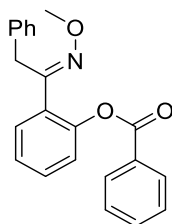

**(Z)-2-(1-(methoxyimino)-2-phenylethyl)phenyl benzoate (3x):** Pale yellow solid (64%, 66.2 mg, E/Z = 20:1);  $R_f = 0.24$  (petroleum ether-EtOAc = 30:1); *Major (E-isomer):*  $^1\text{H NMR}$  (500 MHz,  $\text{CDCl}_3$ )  $\delta = 8.20\text{--}8.13$  (m, 2H), 7.69–7.62 (m, 1H), 7.53 (t,  $J = 7.8$  Hz, 2H), 7.45–7.37 (m, 1H), 7.36 (dd,  $J_1 = 7.8$  Hz,  $J_2 = 1.7$  Hz, 1H), 7.28–7.20 (m, 4H), 7.20–7.15 (m, 3H), 4.08 (s, 2H), 3.75 (s, 3H) ppm;  $^{13}\text{C NMR}$  (126 MHz,  $\text{CDCl}_3$ )  $\delta = 165.1, 152.9, 148.6, 143.0, 139.5, 133.6, 130.3$  (2C), 129.8, 129.5, 129.0, 128.8 (2C), 128.6 (2C), 127.9, 127.1 (2C), 124.7, 122.0, 61.7, 14.9 ppm; HRMS (ESI-TOF) for  $\text{C}_{22}\text{H}_{19}\text{NO}_3$ : calcd.  $[\text{M}+\text{Na}]^+$  368.1257; found: 368.1262.

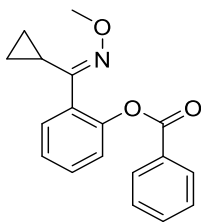

**(Z)-2-(cyclopropyl(methoxyimino)methyl)phenyl benzoate (3y):** Colorless oil (62%, 54.9 mg);  $R_f = 0.40$  (petroleum ether-EtOAc = 20:1);  $^1\text{H NMR}$  (500 MHz,  $\text{CDCl}_3$ )  $\delta = 8.21$  (dd,  $J_1 = 8.4$  Hz,  $J_2 = 1.4$  Hz, 2H), 7.69-7.62 (m, 1H), 7.57-7.48 (m, 2H), 7.47-7.40 (m, 1H), 7.33 (dd,  $J_1 = 8.1$  Hz,  $J_2 = 1.1$  Hz, 1H), 7.31-7.25 (m, 2H), 3.87 (s, 3H), 2.41-2.23 (m, 1H), 0.83 (dd,  $J_1 = 8.5$  Hz,  $J_2 = 2.0$  Hz, 2H), 0.57 (dd,  $J_1 = 5.3$  Hz,  $J_2 = 1.9$  Hz, 2H) ppm;  $^{13}\text{C NMR}$  (126 MHz,  $\text{CDCl}_3$ )  $\delta = 164.7, 158.6, 149.2, 133.6, 130.8, 130.2$  (2C), 129.8, 129.6, 128.6 (2C), 126.5, 125.6, 123.0, 61.9, 10.0, 5.4 (2C) ppm; HRMS (ESI-TOF) for  $\text{C}_{18}\text{H}_{17}\text{NO}_3$ : calcd.  $[\text{M}+\text{Na}]^+$  318.1101; found: 318.1105.

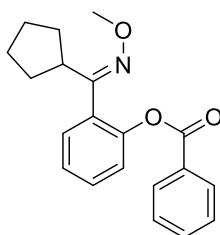

**(Z)-2-(cyclopentyl(methoxyimino)methyl)phenyl benzoate (3z):** Pale yellow oil (55%, 53.3 mg);  $R_f = 0.25$  (petroleum ether-EtOAc = 20:1);  $^1\text{H NMR}$  (500 MHz,  $\text{CDCl}_3$ )  $\delta = 8.22$ -8.15 (m, 2H), 7.68-7.60 (m, 1H), 7.52 (t,  $J = 7.8$  Hz, 2H), 7.47-7.39 (m, 1H), 7.33 (dd,  $J_1 = 7.5$  Hz,  $J_2 = 1.8$  Hz, 2H), 7.29 (dd,  $J_1 = 7.3$  Hz,  $J_2 = 1.2$  Hz, 1H), 3.80 (s, 3H), 3.46-3.28 (m, 1H), 2.04-1.80 (m, 2H), 1.65-1.42 (m, 6H) ppm;  $^{13}\text{C NMR}$  (126 MHz,  $\text{CDCl}_3$ )  $\delta = 164.7, 160.5, 148.8, 133.5, 130.3, 130.2$  (2C), 129.6, 129.4, 129.1, 128.6 (2C), 125.5, 123.0, 61.6, 39.9, 29.8 (2C), 25.2 (2C) ppm; HRMS (ESI-TOF) for  $\text{C}_{20}\text{H}_{21}\text{NO}_3$ : calcd.  $[\text{M}+\text{Na}]^+$  346.1414; found: 346.1546.

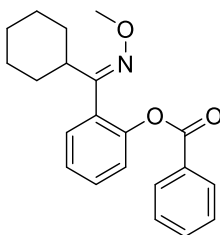

**(Z)-2-(cyclohexyl(methoxyimino)methyl)phenyl benzoate (3aa):** Yellow oil (60%, 60.7 mg, E/Z = 15:1);  $R_f = 0.24$  (petroleum ether-EtOAc = 30:1); *Major (E-isomer):*  $^1\text{H NMR}$  (500 MHz,  $\text{CDCl}_3$ )  $\delta = 8.21$ -8.16 (m, 2H), 7.68-7.61 (m, 1H), 7.52 (t,  $J = 7.8$  Hz, 2H), 7.47-7.40 (m, 1H), 7.35 (dd,  $J_1 = 7.7$  Hz,  $J_2 = 1.8$  Hz, 1H), 7.34-7.25 (m, 2H), 3.78 (s, 3H), 3.27-3.05 (m, 1H), 1.80 (d,  $J = 11.4$  Hz, 2H), 1.74-1.60 (m, 3H), 1.38-1.24 (m, 4H), 1.17-1.06 (m, 1H) ppm;  $^{13}\text{C NMR}$  (126 MHz,  $\text{CDCl}_3$ )  $\delta = 164.9, 160.4, 148.9, 133.5, 130.4, 130.2$  (2C), 129.6, 129.3, 128.9, 128.5 (2C), 125.4, 123.2, 61.6, 39.1, 29.1 (2C), 26.1 (2C), 25.9 ppm; HRMS (ESI-TOF) for  $\text{C}_{21}\text{H}_{23}\text{NO}_3$ : calcd.  $[\text{M}+\text{Na}]^+$  360.1570; found: 360.1682.

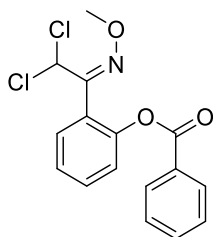

**(E)-2-(2,2-dichloro-1-(methoxyimino)ethyl)phenyl benzoate (3ab):** Colorless oil (90%, 91.0 mg);  $R_f = 0.35$  (petroleum ether-EtOAc = 20:1);  $^1\text{H NMR}$  (500 MHz,  $\text{CDCl}_3$ )  $\delta = 8.25\text{-}8.19$  (m, 2H), 7.83 (dd,  $J_1 = 8.2$  Hz,  $J_2 = 1.6$  Hz, 1H), 7.69-7.62 (m, 1H), 7.58-7.50 (m, 3H), 7.39 (d,  $J = 7.9$  Hz, 2H), 7.18 (s, 1H), 3.81 (s, 3H) ppm;  $^{13}\text{C NMR}$  (126 MHz,  $\text{CDCl}_3$ )  $\delta = 164.7, 149.8, 149.3, 133.5, 130.9, 130.7, 130.2$  (2C), 129.3, 128.5 (2C), 125.5, 124.3, 123.5, 63.0, 60.3 ppm; HRMS (ESI-TOF) for  $\text{C}_{16}\text{H}_{13}\text{Cl}_2\text{NO}_3$ ; calcd.  $[\text{M}+\text{Na}]^+$  360.0165; found: 360.0165.

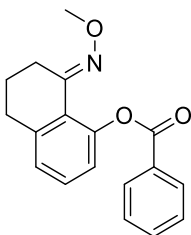

**(E)-8-(methoxyimino)-5,6,7,8-tetrahydronaphthalen-1-yl benzoate (3ac):** Pale red oil (73%, 64.6 mg,  $E/Z = 19:1$ );  $R_f = 0.35$  (petroleum ether-EtOAc = 20:1); major *E*-isomer:  $^1\text{H NMR}$  (500 MHz,  $\text{CDCl}_3$ )  $\delta = 8.29\text{-}8.23$  (m, 2H), 7.66-7.59 (m, 1H), 7.51 (t,  $J = 7.8$  Hz, 2H), 7.30 (t,  $J = 7.8$  Hz, 1H), 7.12 (d,  $J = 7.6$  Hz, 1H), 7.07 (d,  $J = 8.0$  Hz, 1H), 3.36 (s, 3H), 2.78 (t,  $J = 4.0$  Hz, 2H), 2.73 (t,  $J = 6.7$  Hz, 2H), 1.87-1.78 (m, 2H) ppm;  $^{13}\text{C NMR}$  (126 MHz,  $\text{CDCl}_3$ )  $\delta = 165.6, 152.2, 148.1, 142.6, 133.0, 130.5, 130.4$  (2C), 129.0, 128.3 (2C), 126.4, 123.6, 122.2, 61.4, 30.5, 24.7, 21.0 ppm; HRMS (ESI-TOF) for  $\text{C}_{18}\text{H}_{17}\text{NO}_3$ ; calcd.  $[\text{M}+\text{Na}]^+$  318.1101; found: 318.1104.

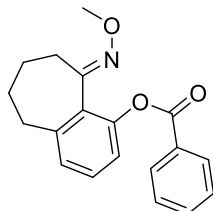

**(E)-9-(methoxyimino)-6,7,8,9-tetrahydro-5H-benzo[7]annulen-1-yl benzoate (3ad):** Pale yellow solid (47%, 43.6 mg);  $R_f = 0.22$  (petroleum ether-EtOAc = 30:1);  $^1\text{H NMR}$  (500 MHz,  $\text{CDCl}_3$ )  $\delta = 8.22\text{-}8.14$  (m, 2H), 7.67-7.58 (m, 1H), 7.51 (t,  $J = 7.8$  Hz, 2H), 7.33 (t,  $J = 7.8$  Hz, 1H), 7.12 (dd,  $J_1 = 8.2$  Hz,  $J_2 = 1.2$  Hz, 1H), 7.08 (d,  $J = 7.1$  Hz, 1H), 3.59 (s, 3H), 2.78 (t,  $J = 6.6$  Hz, 2H), 2.64-2.56 (m, 2H), 1.82-1.73 (m, 2H), 1.71-1.63 (m, 2H) ppm;  $^{13}\text{C NMR}$  (126 MHz,  $\text{CDCl}_3$ )  $\delta = 165.5, 157.2, 148.0, 141.8, 133.3, 130.2$  (2C), 129.9, 129.5, 128.8, 128.4 (2C), 126.3, 120.8, 61.6, 32.3, 26.5, 26.3, 22.1 ppm; HRMS (ESI-TOF) for  $\text{C}_{19}\text{H}_{19}\text{NO}_3$ ; calcd.  $[\text{M}+\text{Na}]^+$  332.1257; found: 332.1260.

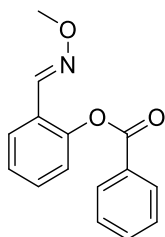

**(Z)-2-((methoxyimino)methyl)phenyl benzoate (3ae):** Pale yellow solid (64%, 49.0 mg);  $R_f = 0.40$  (petroleum ether-EtOAc = 30:1);  $^1\text{H NMR}$  (500 MHz,  $\text{CDCl}_3$ )  $\delta = 8.27\text{-}8.21$  (m, 2H), 8.20 (s, 1H), 7.87 (dd,  $J_1 = 7.9$  Hz,  $J_2 = 1.7$  Hz, 1H), 7.72-7.64 (m, 1H), 7.54 (t,  $J = 7.8$  Hz, 2H), 7.46 (td,  $J_1 = 7.8$  Hz,  $J_2 = 1.7$  Hz, 1H), 7.32 (td,  $J_1 = 7.6$  Hz,  $J_2 = 1.2$  Hz, 1H), 7.25 (dd,  $J_1 = 8.1$  Hz,  $J_2 = 1.2$  Hz, 1H), 3.87 (s, 3H) ppm;  $^{13}\text{C NMR}$  (126 MHz,  $\text{CDCl}_3$ )  $\delta = 164.9, 148.9, 143.8, 133.8, 130.7, 130.3$  (2C), 129.1, 128.6 (2C), 127.7, 126.3, 124.9, 123.1, 62.0 ppm; HRMS (ESI-TOF) for  $\text{C}_{15}\text{H}_{13}\text{NO}_3$ : calcd.  $[\text{M}+\text{Na}]^+$  278.0788; found: 278.0793.

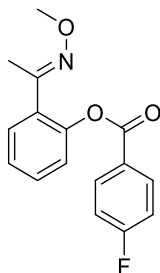

**(Z)-2-(1-(methoxyimino)ethyl)phenyl 4-fluorobenzoate (3af):** Pale yellow oil (90%, 77.5 mg);  $R_f = 0.20$  (petroleum ether-EtOAc = 20:1);  $^1\text{H NMR}$  (500 MHz,  $\text{CDCl}_3$ )  $\delta = 8.27\text{-}8.20$  (m, 2H), 7.51 (dd,  $J_1 = 7.7$  Hz,  $J_2 = 1.7$  Hz, 1H), 7.44 (td,  $J_1 = 7.7$  Hz,  $J_2 = 1.7$  Hz, 1H), 7.32 (td,  $J_1 = 7.6$  Hz,  $J_2 = 1.3$  Hz, 1H), 7.26-7.17 (m, 3H), 3.74 (s, 3H), 2.16 (s, 3H) ppm;  $^{13}\text{C NMR}$  (126 MHz,  $\text{CDCl}_3$ )  $\delta = 166.1$  (d,  $J = 255.1$  Hz), 164.1, 153.1, 148.1, 132.9 (d,  $J = 9.3$  Hz, 2C), 130.4, 129.8, 129.5, 126.2, 125.8 (d,  $J = 2.9$  Hz), 123.4, 115.8 (d,  $J = 22.0$  Hz, 2C), 61.7, 15.0 ppm; HRMS (ESI-TOF) for  $\text{C}_{16}\text{H}_{14}\text{FNO}_3$ : calcd.  $[\text{M}+\text{Na}]^+$  310.0850; found: 310.0859.

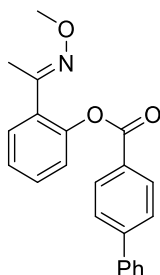

**(Z)-2-(1-(methoxyimino)ethyl)phenyl [1,1'-biphenyl]-4-carboxylate (3ag):** Pale yellow oil (60%, 62.1 mg);  $R_f = 0.20$  (petroleum ether-EtOAc = 20:1);  $^1\text{H NMR}$  (500 MHz,  $\text{CDCl}_3$ )  $\delta = 8.31\text{-}8.26$  (m, 2H), 7.79-7.73 (m, 2H), 7.69 (dd,  $J_1 = 8.2$  Hz,  $J_2 = 1.3$  Hz, 2H), 7.52 (m, 3H), 7.45 (m, 2H), 7.33 (td,  $J_1 = 7.6$  Hz,  $J_2 = 1.3$  Hz, 1H), 7.27 (dd,  $J_1 = 8.1$  Hz,  $J_2 = 1.2$  Hz, 1H), 3.80 (s, 3H), 2.20 (s, 3H) ppm;  $^{13}\text{C NMR}$  (126 MHz,  $\text{CDCl}_3$ )  $\delta = 165.0, 153.3, 148.3, 146.3, 139.8, 130.8$  (2C), 130.5, 129.8, 129.5, 129.0 (2C), 128.3, 128.2, 127.3 (2C), 127.2 (2C), 126.1, 123.4, 61.8, 15.1 ppm; HRMS (ESI-TOF) for  $\text{C}_{22}\text{H}_{19}\text{NO}_3$ : calcd.  $[\text{M}+\text{Na}]^+$  368.1257; found: 368.1266.

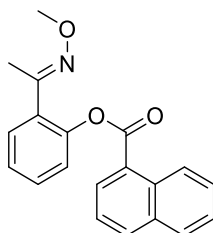

**(Z)-2-(1-(methoxyimino)ethyl)phenyl 1-naphthoate (3ah):** Pale yellow oil (89%, 85.2 mg);  $R_f = 0.30$  (petroleum ether-EtOAc = 20:1);  $^1\text{H NMR}$  (500 MHz,  $\text{CDCl}_3$ )  $\delta = 9.11$  (dd,  $J_1 = 8.7$  Hz,  $J_2 = 1.1$  Hz, 1H), 8.54 (dd,  $J_1 = 7.3$  Hz,  $J_2 = 1.4$  Hz, 1H), 8.13 (d,  $J = 8.2$  Hz, 1H), 7.95 (d,  $J = 8.1$  Hz, 1H),

7.70-7.65 (m, 1H), 7.63-7.56 (m, 2H), 7.55 (dd,  $J_1 = 7.7$  Hz,  $J_2 = 1.7$  Hz, 1H), 7.53-7.46 (m, 1H), 7.40-7.31 (m, 2H), 3.77 (s, 3H), 2.23 (s, 3H) ppm;  $^{13}\text{C}$  NMR (126 MHz,  $\text{CDCl}_3$ )  $\delta = 165.5, 153.3, 148.2, 134.3, 133.9, 131.7, 131.4, 130.8, 129.7, 129.5, 128.6, 128.1, 126.4, 126.1, 125.8, 125.7, 124.5, 123.5, 61.7, 15.2$  ppm; HRMS (ESI-TOF) for  $\text{C}_{20}\text{H}_{17}\text{NO}_3$ : calcd.  $[\text{M}+\text{Na}]^+$  342.1101; found: 342.1102.

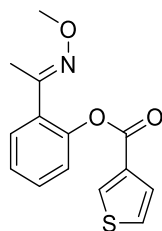

**(Z)-2-(1-(methoxyimino)ethyl)phenyl thiophene-3-carboxylate (3ai):** Pale yellow oil (80%, 66.0 mg);  $R_f = 0.30$  (petroleum ether-EtOAc = 20:1);  $^1\text{H}$  NMR (500 MHz,  $\text{CDCl}_3$ )  $\delta = 8.32$  (dd,  $J_1 = 3.0$  Hz,  $J_2 = 1.1$  Hz, 1H), 7.68 (dd,  $J_1 = 5.0$  Hz,  $J_2 = 1.1$  Hz, 1H), 7.50 (dd,  $J_1 = 7.7$  Hz,  $J_2 = 1.7$  Hz, 1H), 7.43 (td,  $J_1 = 7.7$  Hz,  $J_2 = 1.5$  Hz, 1H), 7.39 (dd,  $J_1 = 5.0$  Hz,  $J_2 = 3.1$  Hz, 1H), 7.31 (t,  $J = 7.6$  Hz, 1H), 7.24 (d,  $J = 8.1$  Hz, 1H), 3.79 (s, 3H), 2.17 (s, 3H) ppm;  $^{13}\text{C}$  NMR (126 MHz,  $\text{CDCl}_3$ )  $\delta = 160.9, 153.3, 148.0, 134.1, 132.9, 130.4, 129.7, 129.5, 128.3, 126.4, 126.1, 123.4, 61.7, 15.1$  ppm; HRMS (ESI-TOF) for  $\text{C}_{14}\text{H}_{13}\text{NO}_3\text{S}$ : calcd.  $[\text{M}+\text{Na}]^+$  298.0508; found: 298.0519.

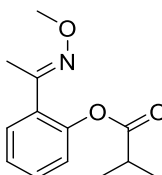

**(Z)-2-(1-(methoxyimino)ethyl)phenyl isobutyrate (3aj):** Yellow oil (88%, 62.0 mg);  $R_f = 0.40$  (petroleum ether-EtOAc = 20:1);  $^1\text{H}$  NMR (500 MHz,  $\text{CDCl}_3$ )  $\delta = 7.44$ -7.34 (m, 2H), 7.25 (td,  $J_1 = 7.6$  Hz,  $J_2 = 1.2$ , 1H), 7.09 (dd,  $J_1 = 8.1$  Hz,  $J_2 = 1.2$  Hz, 1H), 3.97 (s, 3H), 2.87-2.75 (m, 1H), 2.16 (s, 3H), 1.33 (s, 3H), 1.32 (s, 3H) ppm;  $^{13}\text{C}$  NMR (126 MHz,  $\text{CDCl}_3$ )  $\delta = 175.2, 153.6, 148.2, 130.7, 129.6, 129.4, 125.9, 123.0, 61.8, 34.2, 18.8$  (2C), 15.5 ppm; HRMS (ESI-TOF) for  $\text{C}_{13}\text{H}_{17}\text{NO}_3$ : calcd.  $[\text{M}+\text{Na}]^+$  258.101; found: 258.1237.

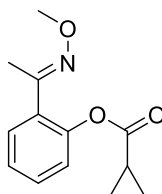

**(Z)-2-(1-(methoxyimino)ethyl)phenyl cyclopropanecarboxylate (3ak):** Yellow oil (89%, 62.2 mg, E/Z = 15:1);  $R_f = 0.20$  (petroleum ether-EtOAc = 20:1); major *E*-isomer:  $^1\text{H}$  NMR (500 MHz,  $\text{CDCl}_3$ )  $\delta = 7.43$  (dd,  $J_1 = 7.7$  Hz,  $J_2 = 1.7$  Hz, 1H), 7.40-7.33 (m, 1H), 7.25 (td,  $J_1 = 7.6$  Hz,  $J_2 = 1.3$ , 1H), 7.11 (dd,  $J_1 = 8.1$  Hz,  $J_2 = 1.2$  Hz, 1H), 4.00 (s, 3H), 2.17 (s, 3H), 1.91-1.82 (m, 1H), 1.22-1.15 (m, 2H), 1.06-0.97 (m, 2H) ppm;  $^{13}\text{C}$  NMR (126 MHz,  $\text{CDCl}_3$ )  $\delta = 173.2, 153.6, 148.1, 130.5, 129.6, 129.4, 125.9, 123.2, 61.9, 15.2, 13.0, 9.1$  (2C) ppm; HRMS (ESI-TOF) for  $\text{C}_{13}\text{H}_{15}\text{NO}_3$ : calcd.  $[\text{M}+\text{Na}]^+$  256.0944; found: 256.1091.



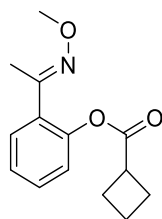

**(Z)-2-(1-(methoxyimino)ethyl)phenyl cyclobutanecarboxylate (3al):** Colorless oil (84%, 62.2 mg);  $R_f = 0.30$  (petroleum ether-EtOAc = 20:1);  $^1\text{H NMR}$  (500 MHz,  $\text{CDCl}_3$ )  $\delta = 7.42$  (dd,  $J_1 = 7.7$  Hz,  $J_2 = 1.7$  Hz, 1H), 7.41-7.34 (m, 1H), 7.25 (td,  $J_1 = 7.6$  Hz,  $J_2 = 1.2$  Hz, 1H), 7.11 (dd,  $J_1 = 8.1$  Hz,  $J_2 = 1.2$  Hz, 1H), 3.97 (s, 3H), 3.45-3.30 (m, 1H), 2.51-2.40 (m, 2H), 2.38-2.27 (m, 2H), 2.15 (s, 3H), 2.07 (dt,  $J_1 = 11.3$  Hz,  $J_2 = 8.8$  Hz, 1H), 2.04-1.94 (m, 1H) ppm;  $^{13}\text{C NMR}$  (126 MHz,  $\text{CDCl}_3$ )  $\delta = 173.5, 153.7, 148.1, 130.6, 129.6, 129.4, 125.9, 123.0, 61.8, 38.1, 25.2$  (2C), 18.4, 15.4 ppm; HRMS (ESI-TOF) for  $\text{C}_{14}\text{H}_{17}\text{NO}_3$ : calcd.  $[\text{M}+\text{Na}]^+$  270.1208; found: 270.1256.

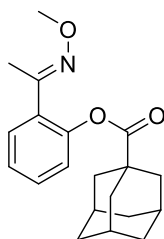

**2-((Z)-1-(methoxyimino)ethyl)phenyl (3r,5r,7r)-adamantane-1-carboxylate (3am):** Colorless oil (84%, 82.4 mg);  $R_f = 0.40$  (petroleum ether-EtOAc = 20:1);  $^1\text{H NMR}$  (500 MHz,  $\text{CDCl}_3$ )  $\delta = 7.42$ -7.33 (m, 2H), 7.24 (td,  $J_1 = 7.5$  Hz,  $J_2 = 1.2$  Hz, 1H), 7.03 (dd,  $J_1 = 8.1$  Hz,  $J_2 = 1.2$  Hz, 1H), 3.98 (s, 3H), 2.15 (s, 3H), 2.10 (s, 3H), 2.06 (d,  $J = 2.9$  Hz, 6H), 1.78 (s, 6H) ppm;  $^{13}\text{C NMR}$  (126 MHz,  $\text{CDCl}_3$ )  $\delta = 175.8, 153.7, 148.5, 130.9, 129.6, 129.4, 125.7, 123.0, 61.8, 41.0, 38.7$  (3C), 36.4 (3C), 27.9 (3C), 15.8 ppm; HRMS (ESI-TOF) for  $\text{C}_{20}\text{H}_{25}\text{NO}_3$ : calcd.  $[\text{M}+\text{Na}]^+$  350.1727; found: 350.1737

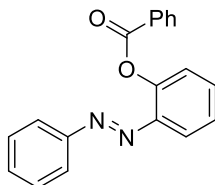

**(E)-2-(phenyldiazenyl)phenyl benzoate (5a):** Orange solid (80%, 72.5 mg);  $R_f = 0.33$  (petroleum ether-EtOAc = 30:1);  $^1\text{H NMR}$  (500 MHz,  $\text{CDCl}_3$ )  $\delta = 8.31$  (d,  $J = 7.2$  Hz, 2H), 7.92 (dd,  $J_1 = 8.3$  Hz,  $J_2 = 1.6$  Hz, 1H), 7.75 (dd,  $J_1 = 2.5$  Hz,  $J_2 = 1.5$  Hz, 2H), 7.73-7.66 (m, 1H), 7.61-7.53 (m, 3H), 7.46-7.36 (m, 5H) ppm;  $^{13}\text{C NMR}$  (126 MHz,  $\text{CDCl}_3$ )  $\delta = 165.5, 152.7, 149.3, 144.0, 133.6, 132.1, 131.2, 130.4$  (2C), 129.5, 129.0 (2C), 128.6 (2C), 126.6, 123.6, 123.1 (2C), 117.9 ppm; HRMS (ESI-TOF) for  $\text{C}_{19}\text{H}_{14}\text{N}_2\text{O}_2$ : calcd.  $[\text{M}+\text{Na}]^+$  325.0947; found: 325.0952.

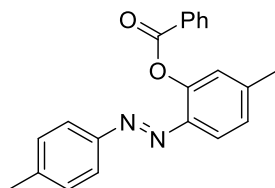

**(E)-5-methyl-2-(p-tolyldiazenyl)phenyl benzoate (5b):** Orange solid (70%, 69.3 mg);  $R_f = 0.37$  (petroleum ether-EtOAc = 30:1);  $^1\text{H NMR}$  (500 MHz,  $\text{CDCl}_3$ )  $\delta = 8.30$  (dd,  $J_1 = 8.3$  Hz,  $J_2 = 1.4$  Hz, 2H), 7.82 (d,  $J = 8.8$  Hz, 1H), 7.73-7.65 (m, 1H), 7.62 (d,  $J = 8.3$  Hz, 2H), 7.56 (t,  $J = 7.8$  Hz, 2H),

7.24-7.12 (m, 4H), 2.48 (s, 3H), 2.38 (s, 3H) ppm;  $^{13}\text{C}$  NMR (126 MHz,  $\text{CDCl}_3$ )  $\delta$  = 165.6, 150.9, 149.0, 142.8, 141.8, 141.5, 133.5, 130.3 (2C), 129.9, 129.6 (2C), 128.6 (2C), 127.4, 123.8, 122.9 (2C), 117.6, 21.5, 21.4 ppm; HRMS (ESI-TOF) for  $\text{C}_{21}\text{H}_{18}\text{N}_2\text{O}_2$ : calcd.  $[\text{M}+\text{Na}]^+$  353.1260; found: 353.1263.

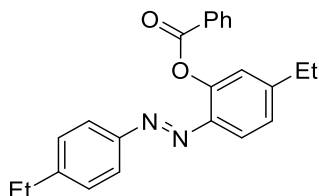

**(E)-5-ethyl-2-((4-ethylphenyl)diazenyl)phenyl benzoate (5c):** Orange solid (75%, 80.6 mg);  $R_f$  = 0.40 (petroleum ether-EtOAc = 30:1);  $^1\text{H}$  NMR (500 MHz,  $\text{CDCl}_3$ )  $\delta$  = 8.32 (dd,  $J_1$  = 9.5 Hz,  $J_2$  = 1.5 Hz, 2H), 7.86(d,  $J$  = 8.8 Hz, 1H), 7.72-7.64 (m, 3H), 7.57 (t,  $J$  = 7.8 Hz, 2H), 7.27-7.19 (m, 4H), 2.80 (q,  $J$  = 7.6 Hz, 2H), 2.68 (q,  $J$  = 7.6 Hz, 2H), 1.35 (t,  $J$  = 7.6 Hz, 3H), 1.26 (t,  $J$  = 7.6 Hz, 3H) ppm;  $^{13}\text{C}$  NMR (126 MHz,  $\text{CDCl}_3$ )  $\delta$  = 165.6, 151.1, 149.1, 149.0, 147.7, 142.0, 133.5, 130.3 (2C), 129.6, 128.6 (2C), 128.4 (2C), 126.1, 123.0 (2C), 122.6, 117.7, 28.7, 28.7, 15.3, 15.0 ppm; HRMS (ESI-TOF) for  $\text{C}_{23}\text{H}_{22}\text{N}_2\text{O}_2$ : calcd.  $[\text{M}+\text{Na}]^+$  381.1537; found: 381.1582.

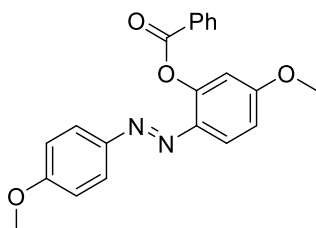

**(E)-5-methoxy-2-((4-methoxyphenyl)diazenyl)phenyl benzoate (5d):** Orange solid (83%, 90.1 mg);  $R_f$  = 0.33 (petroleum ether-EtOAc = 10:1);  $^1\text{H}$  NMR (500 MHz,  $\text{CDCl}_3$ )  $\delta$  = 8.31-8.26 (m, 2H), 7.89 (d,  $J$  = 8.9 Hz, 1H), 7.71-7.67 (m, 1H), 7.66-7.63 (m, 2H), 7.56 (dd,  $J_1$  = 8.4 Hz,  $J_2$  = 7.1 Hz, 2H), 6.94-6.89 (m, 2H), 6.87-6.83 (m, 2H), 3.91 (s, 3H), 3.83 (s, 3H) ppm;  $^{13}\text{C}$  NMR (126 MHz,  $\text{CDCl}_3$ )  $\delta$  = 165.4, 162.3, 161.7, 150.4, 147.2, 138.2, 133.6, 130.4 (2C), 129.5, 128.6 (2C), 124.5 (2C), 118.9, 114.0 (2C), 112.8, 108.1, 55.8, 55.5 ppm; HRMS (ESI-TOF) for  $\text{C}_{21}\text{H}_{18}\text{N}_2\text{O}_4$ : calcd.  $[\text{M}+\text{Na}]^+$  385.1159; found: 385.1165.

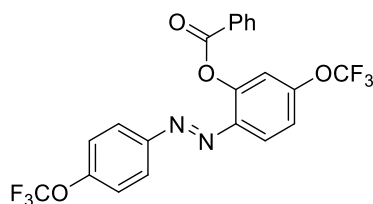

**(E)-5-(trifluoromethoxy)-2-((4-(trifluoromethoxy)phenyl)diazenyl)phenyl benzoate (5e):** Pale pink solid (70%, 98.7 mg, E/Z = 19:1);  $R_f$  = 0.50 (petroleum ether-EtOAc = 30:1); major *E*-isomer:  $^1\text{H}$  NMR (500 MHz,  $\text{CDCl}_3$ )  $\delta$  = 8.27 (dd,  $J_1$  = 8.3 Hz,  $J_2$  = 1.3 Hz, 2H), 7.95 (d,  $J$  = 8.9 Hz, 1H), 7.78-7.68 (m, 3H), 7.62-7.55 (m, 2H), 7.31 (d,  $J$  = 1.5 Hz, 1H), 7.30-7.24 (m, 1H), 7.23 (dd,  $J_1$  = 9.0 Hz,  $J_2$  = 1.0 Hz, 2H) ppm;  $^{13}\text{C}$  NMR (126 MHz,  $\text{CDCl}_3$ )  $\delta$  = 165.0, 151.6, 151.3, 150.6, 150.1, 142.2, 134.1, 130.4 (2C), 128.8 (2C), 128.8, 124.6 (2C), 121.2 (2C), 120.4 (q,  $J$  = 258.3 Hz), 119.2 (q,  $J$  = 258.3 Hz), 118.7, 118.1, 116.2 ppm; HRMS (ESI-TOF) for  $\text{C}_{21}\text{H}_{12}\text{F}_6\text{N}_2\text{O}_4$ : calcd.  $[\text{M}+\text{Na}]^+$  493.0593; found: 493.0606.

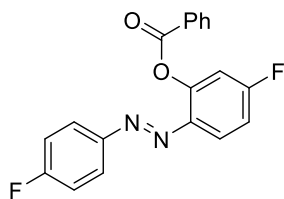

**(E)-5-fluoro-2-((4-fluorophenyl)diazenyl)phenyl benzoate (5f):** Yellow solid (72%, 73.0 mg, E/Z = 14:1);  $R_f = 0.43$  (petroleum ether-EtOAc = 30:1); major *E*-isomer:  $^1\text{H NMR}$  (500 MHz,  $\text{CDCl}_3$ )  $\delta = 8.27$  (dd,  $J_1 = 8.3$  Hz,  $J_2 = 1.3$  Hz, 2H), 8.01-7.85 (m, 1H), 7.78-7.64 (m, 2H), 7.57 (t,  $J = 7.8$  Hz, 2H), 7.25-7.18 (m, 1H), 7.19-7.12 (m, 1H), 7.14-7.08 (m, 1H), 7.06 (dd,  $J_1 = 9.0$  Hz,  $J_2 = 8.2$  Hz, 2H) ppm;  $^{13}\text{C NMR}$  (126 MHz,  $\text{CDCl}_3$ )  $\delta = 165.5$  (d,  $J = 2.2$  Hz), 164.4 (d,  $J = 251.9$  Hz), 164.3 (d,  $J = 201.7$  Hz), 150.4 (d,  $J = 11.7$  Hz), 149.2 (d,  $J = 3.2$  Hz), 140.6 (d,  $J = 3.8$  Hz), 133.9, 130.4 (2C), 129.0, 128.7 (2C), 125.0 (d,  $J = 9.1$  Hz), 124.8 (d,  $J = 9.0$  Hz), 119.2 (d,  $J = 10.1$  Hz), 116.1 (d,  $J = 22.9$  Hz), 116.0 (d,  $J = 22.8$  Hz), 113.9 (d,  $J = 22.6$  Hz), 111.3 (d,  $J = 25.1$  Hz) ppm; HRMS (ESI-TOF) for  $\text{C}_{19}\text{H}_{12}\text{F}_2\text{N}_2\text{O}_2$ : calcd.  $[\text{M}+\text{Na}]^+$  361.0759; found: 361.0769.

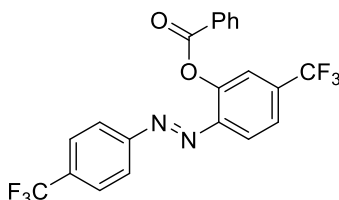

**(E)-5-(trifluoromethyl)-2-((4-(trifluoromethyl)phenyl)diazenyl)phenyl benzoate (5g):** Yellow solid (68%, 89.4 mg, E/Z = 28:1);  $R_f = 0.50$  (petroleum ether-EtOAc = 30:1); major *E*-isomer:  $^1\text{H NMR}$  (500 MHz,  $\text{CDCl}_3$ )  $\delta = 8.27$  (dd,  $J_1 = 8.3$  Hz,  $J_2 = 1.4$  Hz, 2H), 7.99 (dd,  $J_1 = 8.4$  Hz,  $J_2 = 1.0$  Hz, 1H), 7.82 (d,  $J = 7.9$  Hz, 2H), 7.77-7.69 (m, 2H), 7.72-7.65 (m, 3H), 7.62-7.55 (m, 2H) ppm;  $^{13}\text{C NMR}$  (126 MHz,  $\text{CDCl}_3$ )  $\delta = 165.1$ , 154.2, 149.5, 145.7, 134.2(q,  $J = 32.8$  Hz), 134.2, 133.2(q,  $J = 32.8$  Hz), 130.4 (2C), 128.9 (2C), 128.6, 126.4 (q,  $J = 3.7$  Hz, 2C), 123.7 (q,  $J = 273.4$  Hz), 123.6 (q,  $J = 3.7$  Hz), 123.4 (2C), 123.3 (q,  $J = 237.4$  Hz), 121.4 (q,  $J = 3.7$  Hz), 118.5 ppm; HRMS (ESI-TOF) for  $\text{C}_{21}\text{H}_{12}\text{F}_6\text{N}_2\text{O}_2$ : calcd.  $[\text{M}+\text{Na}]^+$  461.0695; found: 461.0698.

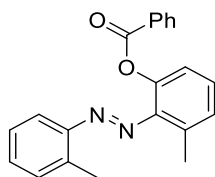

**(E)-3-methyl-2-(o-tolyldiazenyl)phenyl benzoate (5h):** Red brown solid (61%, 60.4 mg, E/Z = 20:1);  $R_f = 0.40$  (petroleum ether-EtOAc = 30:1); major *E*-isomer:  $^1\text{H NMR}$  (500 MHz,  $\text{CDCl}_3$ )  $\delta = 8.15$  (dd,  $J_1 = 8.3$  Hz,  $J_2 = 1.4$  Hz, 2H), 7.65-7.58 (m, 1H), 7.50-7.43 (m, 2H), 7.42 (dd,  $J_1 = 8.1$  Hz,  $J_2 = 1.4$  Hz, 1H), 7.36 (t,  $J = 7.8$  Hz, 1H), 7.33-7.25 (m, 2H), 7.24-7.15 (m, 2H), 7.16-7.09 (m, 1H), 2.58 (s, 3H), 2.41 (s, 3H) ppm;  $^{13}\text{C NMR}$  (126 MHz,  $\text{CDCl}_3$ )  $\delta = 165.4$ , 151.3, 143.8, 142.8, 138.3, 134.8, 133.4, 131.2, 131.1, 130.3 (2C), 129.6, 129.4, 129.3, 128.4 (2C), 126.2, 121.5, 115.2, 19.3, 17.4 ppm; HRMS (ESI-TOF) for  $\text{C}_{21}\text{H}_{18}\text{N}_2\text{O}_2$ : calcd.  $[\text{M}+\text{Na}]^+$  353.1260; found: 353.1267.

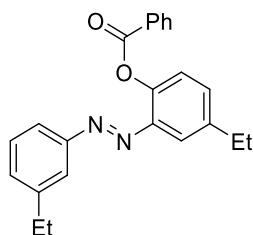

**(E)-4-ethyl-2-((3-ethylphenyl)diazenyl)phenyl benzoate (5i):** Orange solid (80%, 85.9 mg);  $R_f = 0.43$  (petroleum ether-EtOAc = 30:1);  $^1\text{H NMR}$  (600 MHz,  $\text{CDCl}_3$ )  $\delta = 8.31$  (dd,  $J_1 = 8.4$  Hz,  $J_2 = 1.3$  Hz, 2H), 7.75 (d,  $J = 2.2$  Hz, 1H), 7.71-7.66 (m, 1H), 7.62-7.59 (m, 1H), 7.58-7.55 (m, 2H), 7.54-7.52 (m, 1H), 7.42 (dd,  $J_1 = 8.2$  Hz,  $J_2 = 2.2$  Hz, 1H), 7.36-7.30 (m, 2H), 7.26-7.23 (m, 1H), 2.79 (q,  $J = 7.6$  Hz, 2H), 2.59 (q,  $J = 7.6$  Hz, 2H), 1.35 (t,  $J = 7.7$  Hz, 3H), 1.13 (t,  $J = 7.6$  Hz, 3H) ppm;  $^{13}\text{C NMR}$  (151 MHz,  $\text{CDCl}_3$ )  $\delta = 165.8, 153.0, 147.4, 145.1, 143.4, 142.7, 133.5, 131.6, 130.9, 130.4$  (2C), 129.6, 128.8, 128.6 (2C), 116.7, 28.6, 28.5, 15.5, 15.2 ppm; HRMS (ESI-TOF) for  $\text{C}_{23}\text{H}_{22}\text{N}_2\text{O}_2$ : calcd.  $[\text{M}+\text{Na}]^+$  381.1573; found: 381.1583.

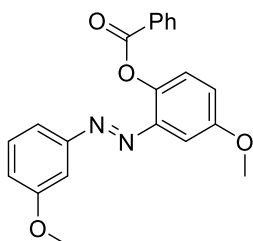

**(E)-4-methoxy-2-((3-methoxyphenyl)diazenyl)phenyl benzoate (5j):** Orange solid (65%, 70.6 mg,  $E/Z = 6:1$ );  $R_f = 0.33$  (petroleum ether-EtOAc = 10:1); major *E*-isomer:  $^1\text{H NMR}$  (500 MHz,  $\text{CDCl}_3$ )  $\delta = 8.30$  (dd,  $J_1 = 8.3$  Hz,  $J_2 = 1.4$  Hz, 2H), 7.70-7.63 (m, 1H), 7.54 (t,  $J = 7.8$  Hz, 2H), 7.52-7.46 (m, 1H), 7.44 (d,  $J = 3.1$  Hz, 1H), 7.37-7.29 (m, 2H), 7.18-7.10 (m, 2H), 7.00-6.94 (m, 1H), 3.92 (s, 3H), 3.43 (s, 3H) ppm;  $^{13}\text{C NMR}$  (126 MHz,  $\text{CDCl}_3$ )  $\delta = 165.5, 162.4, 161.7, 150.4, 147.3, 138.2, 133.6, 130.4$  (2C), 129.5, 128.6 (2C), 124.5 (2C), 118.9, 114.0 (2C), 112.9, 108.1, 55.8, 55.5 ppm; HRMS (ESI-TOF) for  $\text{C}_{21}\text{H}_{18}\text{N}_2\text{O}_4$ : calcd.  $[\text{M}+\text{Na}]^+$  385.1159; found: 385.1167.

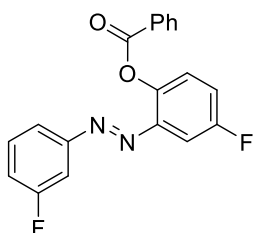

**(E)-4-fluoro-2-((3-fluorophenyl)diazenyl)phenyl benzoate (5k):** Yellow solid (77%, 78.1 mg, major regioisomer: minor regioisomer = 15:1);  $R_f = 0.40$  (petroleum ether-EtOAc = 30:1); major regioisomer:  $^1\text{H NMR}$  (500 MHz,  $\text{CDCl}_3$ )  $\delta = 8.28$  (dd,  $J_1 = 8.3$  Hz,  $J_2 = 1.4$  Hz, 2H), 7.74-7.67 (m, 1H), 7.62 (dd,  $J_1 = 9.2$  Hz,  $J_2 = 2.9$  Hz, 2H), 7.61-7.54 (m, 2H), 7.44-7.35 (m, 2H), 7.35 (dt,  $J_1 = 9.7$  Hz,  $J_2 = 2.3$  Hz, 1H), 7.34-7.26 (m, 1H), 7.18-7.15 (m, 1H) ppm;  $^{13}\text{C NMR}$  (126 MHz,  $\text{CDCl}_3$ )  $\delta = 165.5, 163.1$  (d,  $J = 248.1$  Hz), 160.7 (d,  $J = 247.1$  Hz), 153.8 (d,  $J = 7.0$  Hz), 145.8 (d,  $J = 3.3$  Hz), 144.5 (d,  $J = 6.3$  Hz), 133.9, 130.3 (2C), 130.3 (d,  $J = 8.3$  Hz), 129.0, 128.7 (2C), 124.8 (d,  $J = 8.6$  Hz), 121.0 (d,  $J = 2.9$  Hz), 119.1 (d,  $J = 24.3$  Hz), 118.5 (d,  $J = 22.0$  Hz), 108.2 (d,  $J = 23.1$  Hz), 104.3 (d,  $J = 24.8$  Hz) ppm; HRMS (ESI-TOF) for  $\text{C}_{19}\text{H}_{12}\text{F}_2\text{N}_2\text{O}_2$ : calcd.  $[\text{M}+\text{Na}]^+$  361.0759; found: 361.0765.

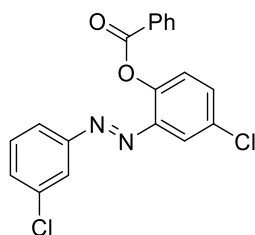

**(E)-4-chloro-2-((3-chlorophenyl)diazenyl)phenyl benzoate (5l):** Pale pink oil (68%, 75.5 mg, E/Z = 13:1);  $R_f = 0.40$  (petroleum ether-EtOAc = 30:1); major *E*-isomer:  $^1\text{H NMR}$  (500 MHz,  $\text{CDCl}_3$ )  $\delta = 8.27$  (dd,  $J_1 = 8.3$  Hz,  $J_2 = 1.4$  Hz, 2H), 7.88 (d,  $J = 2.5$  Hz, 1H), 7.74-7.67 (m, 1H), 7.69-7.61 (m, 2H), 7.61-7.52 (m, 3H), 7.43-7.33 (m, 3H) ppm;  $^{13}\text{C NMR}$  (126 MHz,  $\text{CDCl}_3$ )  $\delta = 165.4, 153.2, 148.3, 144.0, 135.2, 134.0, 132.5, 132.2, 131.5, 130.4$  (2C), 130.1, 128.9, 128.8 (2C), 124.9, 122.7, 122.1, 117.8 ppm; HRMS (ESI-TOF) for  $\text{C}_{19}\text{H}_{12}\text{Cl}_2\text{N}_2\text{O}_2$ : calcd.  $[\text{M}+\text{Na}]^+$  393.0168; found: 393.2096.

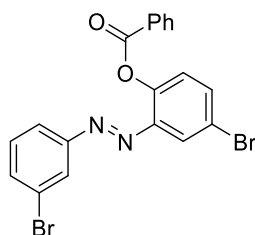

**(E)-4-bromo-2-((3-bromophenyl)diazenyl)phenyl benzoate (5m):** Yellow solid (75%, 103.3 mg);  $R_f = 0.43$  (petroleum ether-EtOAc = 30:1);  $^1\text{H NMR}$  (500 MHz,  $\text{CDCl}_3$ )  $\delta = 8.30$ -8.24 (m, 2H), 8.02 (d,  $J = 2.4$  Hz, 1H), 7.78 (t,  $J = 1.9$  Hz, 1H), 7.74-7.67 (m, 3H), 7.61-7.54 (m, 2H), 7.57-7.51 (m, 1H), 7.35-7.26 (m, 2H) ppm;  $^{13}\text{C NMR}$  (126 MHz,  $\text{CDCl}_3$ )  $\delta = 165.3, 153.3, 148.8, 144.1, 135.1, 134.3, 134.0, 130.4, 130.4$  (2C), 128.9, 128.8 (2C), 125.2, 124.9, 123.3, 123.1, 120.7, 120.0 ppm; HRMS (ESI-TOF) for  $\text{C}_{19}\text{H}_{12}\text{Br}_2\text{N}_2\text{O}_2$ : calcd.  $[\text{M}+\text{Na}]^+$  482.9158; found: 482.9148.

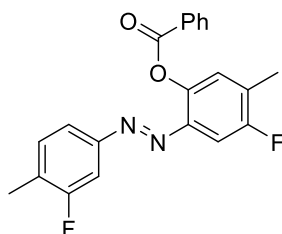

**(E)-4-fluoro-2-((3-fluoro-4-methylphenyl)diazenyl)-5-methylphenyl benzoate (5n):** Yellow solid (62%, 68.1 mg, major regioisomer: minor regioisomer = 9: 1);  $R_f = 0.40$  (petroleum ether-EtOAc = 30:1); major regioisomer:  $^1\text{H NMR}$  (500 MHz,  $\text{CDCl}_3$ )  $\delta = 8.33$ -8.20 (m, 2H), 7.73-7.66 (m, 1H), 7.61-7.55 (m, 3H), 7.49 (dd,  $J_1 = 8.0$  Hz,  $J_2 = 1.9$  Hz, 1H), 7.28 (dd,  $J_1 = 10.5$  Hz,  $J_2 = 1.9$  Hz, 1H), 7.26-7.18 (m, 2H), 2.40 (d,  $J = 2.0$  Hz, 3H), 2.30 (d,  $J = 2.1$  Hz, 3H) ppm;  $^{13}\text{C NMR}$  (126 MHz,  $\text{CDCl}_3$ )  $\delta = 165.7, 161.5$  (d,  $J = 246.8$  Hz), 159.3 (d,  $J = 245.9$  Hz), 152.2 (d,  $J = 7.0$  Hz), 145.3 (d,  $J = 2.9$  Hz), 142.6 (d,  $J = 6.5$  Hz), 133.8, 131.5 (d,  $J = 5.6$  Hz), 130.5 (2C), 129.9 (d,  $J = 20.2$  Hz), 129.2, 128.7 (d,  $J = 28.0$  Hz), 128.7 (2C), 125.7 (d,  $J = 5.3$  Hz), 120.7 (d,  $J = 3.2$  Hz), 107.6 (d,  $J = 23.8$  Hz), 103.7 (d,  $J = 25.8$  Hz), 15.0 (d,  $J = 2.9$  Hz), 14.8 (d,  $J = 3.4$  Hz) ppm; HRMS (ESI-TOF) for  $\text{C}_{21}\text{H}_{16}\text{F}_2\text{N}_2\text{O}_2$ : calcd.  $[\text{M}+\text{Na}]^+$  389.1072; found: 389.1079.

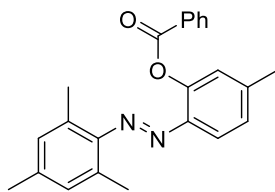

**(E)-2-(mesityldiazenyl)-5-methylphenyl benzoate (5o):** Orange solid (88%, 94.5 mg);  $R_f = 0.40$  (petroleum ether-EtOAc = 30:1);  $^1\text{H NMR}$  (500 MHz,  $\text{CDCl}_3$ )  $\delta = 8.33\text{-}8.17$  (m, 2H), 7.84-7.69 (m, 2H), 7.55-7.48 (m, 2H), 7.23-7.18 (m, 2H), 6.86(s, 2H), 2.49 (s, 3H), 2.32 (s, 6H), 2.29 (s, 3H) ppm;  $^{13}\text{C NMR}$  (126 MHz,  $\text{CDCl}_3$ )  $\delta = 165.3, 149.3, 148.0, 142.9, 142.5, 139.1, 133.5, 132.8, 130.3$  (2C), 130.0 (2C), 129.5, 129.1, 128.5 (2C), 127.5, 124.0, 116.5, 21.4, 21.1, 19.8 (2C) ppm; HRMS (ESI-TOF) for  $\text{C}_{23}\text{H}_{22}\text{N}_2\text{O}_2$ : calcd.  $[\text{M}+\text{Na}]^+$  381.1573; found: 381.1581.

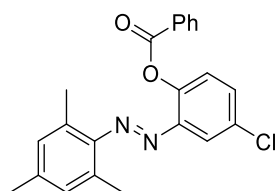

**(E)-4-chloro-2-(mesityldiazenyl)phenyl benzoate (5p):** Red brown solid (66%, 74.8 mg, E/Z = 11:1);  $R_f = 0.47$  (petroleum ether-EtOAc = 30:1); major *E*-isomer:  $^1\text{H NMR}$  (500 MHz,  $\text{CDCl}_3$ )  $\delta = 8.23$  (dd,  $J_1 = 8.3$  Hz,  $J_2 = 1.3$  Hz, 2H), 7.79 (d,  $J = 2.5$  Hz, 1H), 7.70-7.62 (m, 1H), 7.55-7.45 (m, 3H), 7.32 (d,  $J = 8.6$  Hz, 1H), 6.88 (s, 2H), 2.34 (s, 6H), 2.29 (s, 3H) ppm;  $^{13}\text{C NMR}$  (126 MHz,  $\text{CDCl}_3$ )  $\delta = 165.1, 147.9, 147.5, 145.3, 140.4, 133.7, 133.7, 132.5, 131.0, 130.4$  (2C), 130.2 (2C), 129.2, 129.1, 128.6 (2C), 124.9, 116.8, 21.2, 20.2 (2C) ppm; HRMS (ESI-TOF) for  $\text{C}_{22}\text{H}_{19}\text{ClN}_2\text{O}_2$ : calcd.  $[\text{M}+\text{Na}]^+$  401.1027; found: 401.1033.

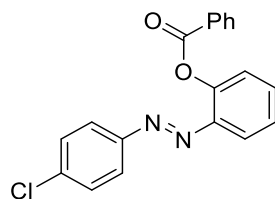

**(E)-2-((4-chlorophenyl)diazenyl)phenyl benzoate (5q):** Orange solid (67%, 67.5 mg);  $R_f = 0.30$  (petroleum ether-EtOAc = 30:1);  $^1\text{H NMR}$  (500 MHz,  $\text{CDCl}_3$ )  $\delta = 8.31\text{-}8.24$  (m, 2H), 7.89 (dd,  $J_1 = 8.3$  Hz,  $J_2 = 1.6$  Hz, 1H), 7.72-7.68 (m, 1H), 7.67-7.64 (m, 2H), 7.59-7.54 (m, 3H), 7.43-7.39 (m, 2H), 7.37-7.33 (m, 2H) ppm;  $^{13}\text{C NMR}$  (126 MHz,  $\text{CDCl}_3$ )  $\delta = 165.5, 151.1, 149.4, 143.8, 137.2, 133.7, 132.4, 130.3$  (2C), 129.4, 129.3 (2C), 128.7 (2C), 126.6, 124.2 (2C), 123.6, 117.9 ppm; HRMS (ESI-TOF) for  $\text{C}_{19}\text{H}_{13}\text{ClN}_2\text{O}_2$ : calcd.  $[\text{M}+\text{Na}]^+$  359.0558; found: 359.0564.

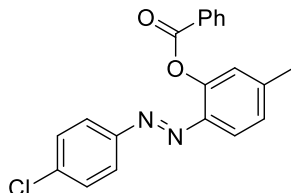

**(E)-2-((4-chlorophenyl)diazenyl)-5-methylphenyl benzoate (5r):** Yellow solid (58%, 60.8 mg, E/Z = 6:1);  $R_f = 0.37$  (petroleum ether-EtOAc = 30:1); major *E*-isomer:  $^1\text{H NMR}$  (600 MHz,  $\text{CDCl}_3$ )  $\delta = 8.28$  (dd,  $J = 8.3, 1.4$  Hz, 2H), 7.71-7.64 (m, 4H), 7.58-7.54 (m, 2H), 7.40 (ddd,  $J_1 = 8.2$  Hz,  $J_2 = 2.2$  Hz,  $J_3 = 0.8$  Hz, 1H), 7.37-7.34 (m, 2H), 7.29 (d,  $J = 9.0$  Hz, 1H), 2.48 (s, 3H) ppm;  $^{13}\text{C NMR}$  (151 MHz,  $\text{CDCl}_3$ )  $\delta = 165.7, 151.1, 147.3, 143.3, 137.1, 136.6, 133.6, 133.1, 130.3$  (2C), 129.4, 129.3 (2C), 128.6 (2C),

124.2 (2C), 123.2, 118.0, 21.1 ppm; HRMS (ESI-TOF) for C<sub>20</sub>H<sub>15</sub>N<sub>2</sub>O<sub>2</sub>: calcd. [M+Na]<sup>+</sup> 373.0714; found: 373.0718.

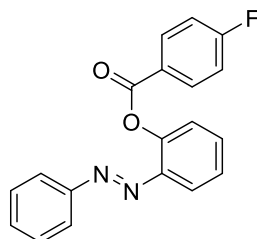

**(E)-2-(phenyldiazenyl)phenyl 4-fluorobenzoate (5s):** Orange solid (82%, 78.7 mg); R<sub>f</sub> = 0.37 (petroleum ether-EtOAc = 30:1); <sup>1</sup>H NMR (500 MHz, CDCl<sub>3</sub>) δ = 8.35-8.28 (m, 2H), 7.91 (dd, J<sub>1</sub> = 8.0 Hz, J<sub>2</sub> = 1.6, 1H), 7.74 (dd, J<sub>1</sub> = 7.8 Hz, J<sub>2</sub> = 1.9 Hz, 2H), 7.57 (td, J<sub>1</sub> = 7.7 Hz, J<sub>2</sub> = 1.7 Hz, 1H), 7.46-7.38 (m, 5H), 7.27-7.20 (m, 2H) ppm; <sup>13</sup>C NMR (126 MHz, CDCl<sub>3</sub>) δ = 166.2 (d, J = 254.9 Hz), 164.5, 152.7, 149.1, 143.9, 133.0 (d, J = 9.5 Hz, 2C), 132.1, 131.3, 129.0 (2C), 126.7, 125.7 (d, J = 2.9 Hz), 123.5, 123.0 (2C), 118.0, 115.9 (d, J = 22.2 Hz, 2C,) ppm; HRMS (ESI-TOF) for C<sub>19</sub>H<sub>13</sub>FN<sub>2</sub>O<sub>2</sub>: calcd. [M+Na]<sup>+</sup> 343.0853; found: 343.0857.

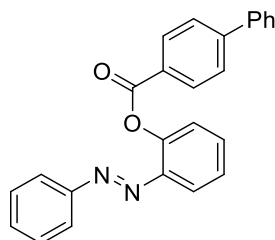

**(E)-2-(phenyldiazenyl)phenyl [1,1'-biphenyl]-4-carboxylate (5t):** Orange solid (46%, 52.1 mg); R<sub>f</sub> = 0.27 (petroleum ether-EtOAc = 30:1); <sup>1</sup>H NMR (600 MHz, CDCl<sub>3</sub>) δ = 8.36 (d, J = 8.4 Hz, 2H), 7.92 (dd, J<sub>1</sub> = 8.4 Hz, J<sub>2</sub> = 1.7 Hz, 1H), 7.79 (d, J = 8.4 Hz, 2H), 7.76 (dd, J<sub>1</sub> = 7.7 Hz, J<sub>2</sub> = 2.1 Hz, 2H), 7.72 (dd, J<sub>1</sub> = 8.2 Hz, J<sub>2</sub> = 1.3 Hz, 2H), 7.62-7.57 (m, 1H), 7.53 (dd, J<sub>1</sub> = 8.4 Hz, J<sub>2</sub> = 6.9 Hz, 2H), 7.48-7.44 (m, 2H), 7.44-7.40 (m, 4H) ppm; <sup>13</sup>C NMR (151 MHz, CDCl<sub>3</sub>) δ = 165.4, 152.7, 149.3, 146.3, 144.0, 139.9, 132.1, 131.3, 130.9 (2C), 129.0 (2C), 129.0 (2C), 128.4, 128.1, 127.4 (2C), 127.3 (2C), 126.6, 123.6, 123.1 (2C), 117.8 ppm; HRMS (ESI-TOF) for C<sub>25</sub>H<sub>18</sub>N<sub>2</sub>O<sub>2</sub>: calcd. [M+Na]<sup>+</sup> 401.1260; found: 401.1268.

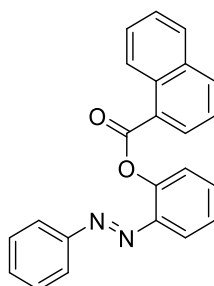

**(E)-2-(phenyldiazenyl)phenyl 1-naphthoate (5u):** Orange solid (82%, 86.6 mg); R<sub>f</sub> = 0.30 (petroleum ether-EtOAc = 30:1); <sup>1</sup>H NMR (500 MHz, CDCl<sub>3</sub>) δ = 9.11 (d, J = 8.5 Hz, 1H), 8.62 (d, J = 7.2 Hz, 1H), 8.16 (d, J = 8.3 Hz, 1H), 8.04-7.96 (m, 2H), 7.86 (d, J = 8.0 Hz, 2H), 7.69-7.58 (m, 4H), 7.52 (d, J = 7.9 Hz, 1H), 7.51-7.44 (m, 1H), 7.44-7.34 (m, 3H) ppm; <sup>13</sup>C NMR (126 MHz, CDCl<sub>3</sub>) δ = 166.1, 152.6, 149.4, 144.1, 134.1, 133.8, 132.1, 131.6, 131.2, 131.2, 128.9 (2C), 128.6, 128.0, 126.6, 126.4, 126.1, 125.8, 124.5, 123.6, 123.1 (2C), 117.5 ppm; HRMS (ESI-TOF) for C<sub>23</sub>H<sub>16</sub>N<sub>2</sub>O<sub>2</sub>: calcd. [M+Na]<sup>+</sup> 375.1104; found: 375.1104.

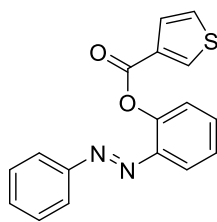

**(E)-2-(phenyldiazenyl)phenyl thiophene-3-carboxylate (5v):** Orange solid (81%, 74.8 mg);  $R_f = 0.27$  (petroleum ether-EtOAc = 30:1);  $^1\text{H NMR}$  (500 MHz,  $\text{CDCl}_3$ )  $\delta = 8.42$  (dd,  $J_1 = 3.0$  Hz,  $J_2 = 1.2$  Hz, 1H), 7.91 (dd,  $J_1 = 8.4$  Hz,  $J_2 = 1.6$  Hz, 1H), 7.78-7.74 (m, 3H), 7.61-7.53 (m, 1H), 7.45-7.38 (m, 6H) ppm;  $^{13}\text{C NMR}$  (126 MHz,  $\text{CDCl}_3$ )  $\delta = 161.2, 152.7, 148.9, 144.0, 134.2, 132.6, 132.0, 131.2, 129.0$  (2C), 128.3, 126.5, 126.4, 123.5, 123.0 (2C), 117.8 ppm; HRMS (ESI-TOF) for  $\text{C}_{17}\text{H}_{12}\text{N}_2\text{O}_2\text{S}$ : calcd.  $[\text{M}+\text{Na}]^+$  331.0512; found: 331.0513.

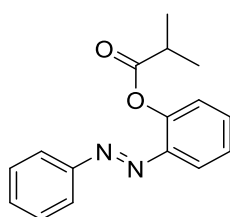

**(E)-2-(phenyldiazenyl)phenyl isobutyrate (5w):** Orange solid (65%, 52.3 mg);  $R_f = 0.37$  (petroleum ether-EtOAc = 30:1);  $^1\text{H NMR}$  (500 MHz,  $\text{CDCl}_3$ )  $\delta = 7.91$ -7.85 (m, 2H), 7.82 (dd,  $J_1 = 8.1$  Hz,  $J_2 = 1.6$  Hz, 1H), 7.56-7.47 (m, 4H), 7.39-7.32 (m, 1H), 7.25 (dd,  $J_1 = 8.0$  Hz,  $J_2 = 1.3$  Hz, 1H), 2.95 (m,  $J = 7.0$  Hz, 1H), 1.40 (s, 3H), 1.39 (s, 3H) ppm;  $^{13}\text{C NMR}$  (126 MHz,  $\text{CDCl}_3$ )  $\delta = 175.5, 152.9, 149.2, 144.3, 132.0, 131.2, 129.0$  (2C), 126.4, 123.4, 123.0 (2C), 117.3, 34.2, 19.1 (2C) ppm; HRMS (ESI-TOF) for  $\text{C}_{16}\text{H}_{16}\text{N}_2\text{O}_2$ : calcd.  $[\text{M}+\text{Na}]^+$  291.1104; found: 291.1109.

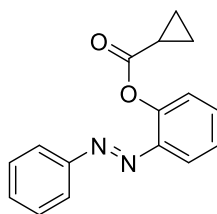

**(E)-2-(phenyldiazenyl)phenyl cyclopropanecarboxylate (5x):** Orange solid (66%, 52.7 mg);  $R_f = 0.30$  (petroleum ether-EtOAc = 30:1);  $^1\text{H NMR}$  (600 MHz,  $\text{CDCl}_3$ )  $\delta = 7.92$ -7.86 (m, 2H), 7.80 (dd,  $J = 8.1, 1.9$  Hz, 1H), 7.54-7.45 (m, 4H), 7.33 (t,  $J = 7.7$  Hz, 1H), 7.26-7.22 (m, 1H), 2.02-1.92 (m, 1H), 1.27-1.20 (m, 2H), 1.11-1.00 (m, 2H) ppm;  $^{13}\text{C NMR}$  (151 MHz,  $\text{CDCl}_3$ )  $\delta = 173.6, 152.8, 149.2, 144.0, 132.0, 131.3, 129.1$  (2C), 126.4, 123.4, 123.1 (2C), 117.4, 13.0, 9.2 (2C) ppm; HRMS (ESI-TOF) for  $\text{C}_{16}\text{H}_{14}\text{N}_2\text{O}_2$ : calcd.  $[\text{M}+\text{Na}]^+$  289.0947; found: 289.0954.

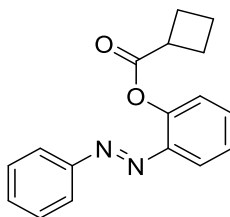

**(E)-2-(phenyldiazenyl)phenyl cyclobutanecarboxylate (5y):** Orange solid (60%, 50.4 mg);  $R_f = 0.33$  (petroleum ether-EtOAc = 30:1);  $^1\text{H NMR}$  (500 MHz,  $\text{CDCl}_3$ )  $\delta = 7.91$ -7.85 (m, 2H), 7.83 (dd,  $J_1 = 8.1$



Hz,  $J_2 = 1.6$  Hz, 1H), 7.56-7.47 (m, 4H), 7.39-7.32 (m, 1H), 7.26 (dd,  $J_1 = 8.0$  Hz,  $J_2 = 1.3$  Hz, 1H), 3.59-3.48 (m, 1H), 2.61-2.50 (m, 2H), 2.45-2.34 (m, 2H), 2.15-1.98 (m, 2H) ppm;  $^{13}\text{C}$  NMR (126 MHz,  $\text{CDCl}_3$ )  $\delta = 173.9, 152.9, 149.2, 144.2, 132.0, 131.3, 129.0$  (2C), 126.4, 123.4, 123.0 (2C), 117.3, 38.1, 25.4 (2C), 18.6 ppm; HRMS (ESI-TOF) for  $\text{C}_{17}\text{H}_{16}\text{N}_2\text{O}_2$ : calcd.  $[\text{M}+\text{Na}]^+$  303.1104; found: 303.1111.

## VIII. References

- (1) (a) S.-J. Lou, D.-Q. Xu and Z.-Y. Xu, Mild and versatile nitrate - promoted C-H bond fluorination, *Angew. Chem., Int. Ed.*, **2014**, *53*, 10330. (b) Y.-J. Mao, G. Luo, H.-Y. Hao, Z.-Y. Xu, S.-J. Lou and D.-Q. Xu, Anion ligand promoted selective C-F bond reductive elimination enables  $\text{C}(\text{sp}^2)$ -H fluorination, *Chem. Commun.*, **2019**, *55*, 14458.
- (2) Frisch, M. J.; Trucks, G. W.; Schlegel, H. B.; Scuseria, G. E.; Robb, M. A.; Cheeseman, J. R.; Scalmani, G.; Barone, V.; Mennucci, B.; Petersson, G. A.; Nakatsuji, H.; Caricato, M.; Li, X.; Hratchian, H. P.; Izmaylov, A. F.; Bloino, J.; Zheng, G.; Sonnenberg, J. L.; Hada, M.; Ehara, M.; Toyota, K.; Fukuda, R.; Hasegawa, J.; Ishida, M.; Nakajima, T.; Honda, Y.; Kitao, O.; Nakai, H.; Vreven, T.; Montgomery, J. A. Jr.; Peralta, J. E.; Ogliaro, F.; Bearpark, M.; Heyd, J. J.; Brothers, E.; Kudin, K. N.; Staroverov, V. N.; Kobayashi, R.; Normand, J.; Raghavachari, K.; Rendell, A.; Burant, J. C.; Iyengar, S. S.; Tomasi, J.; Cossi, M.; Rega, N.; Millam, N. J.; Klene, M.; Knox, J. E.; Cross, J. B.; Bakken, V.; Adamo, C.; Jaramillo, J.; Gomperts, R.; Stratmann, R. E.; Yazyev, O.; Austin, A. J.; Cammi, R.; Pomelli, C.; Ochterski, J. W.; Martin, R. L.; Morokuma, K.; Zakrzewski, V. G.; Voth, G. A.; Salvador, P.; Dannenberg, J. J.; Dapprich, S.; Daniels, A. D.; Farkas, Ö.; Foresman, J. B.; Ortiz, J. V.; Cioslowski, J.; Fox, D. J. *Gaussian 16, Revision A.03*; Gaussian, Inc., Wallingford, CT, 2016.
- (3) (a) Beck, A. D. *J. Chem. Phys.* **1993**, *98*, 5648–5652. (b) Lee, C. T.; Yang, W. T.; Parr, R. G. *Phys. Rev. B* **1988**, *37*, 785–789.
- (4) (a) Dolg, M.; Wedig, U.; Stoll, H.; Preuss, H. Energy-adjusted ab initio pseudopotentials for the first row transition elements. *J. Chem. Phys.* **1987**, *86*, 866–872. (b) Bergner, A.; Dolg, M.; Küchle, W.; Stoll, H.; Preuss, H. *Ab initio* energy-adjusted pseudopotentials for elements of groups 13–17. *Mol. Phys.* **1993**, *80*, 1431–1441.
- (5) Zhao, Y.; Truhlar, D. G. *Theor. Chem. Acc.* **2008**, *120*, 215–241.
- (6) Marenich, A. V.; Cramer, C. J.; Truhlar, D. G. *J. Phys. Chem. B* **2009**, *113*, 6378–6396.

## IX. NMR spectra

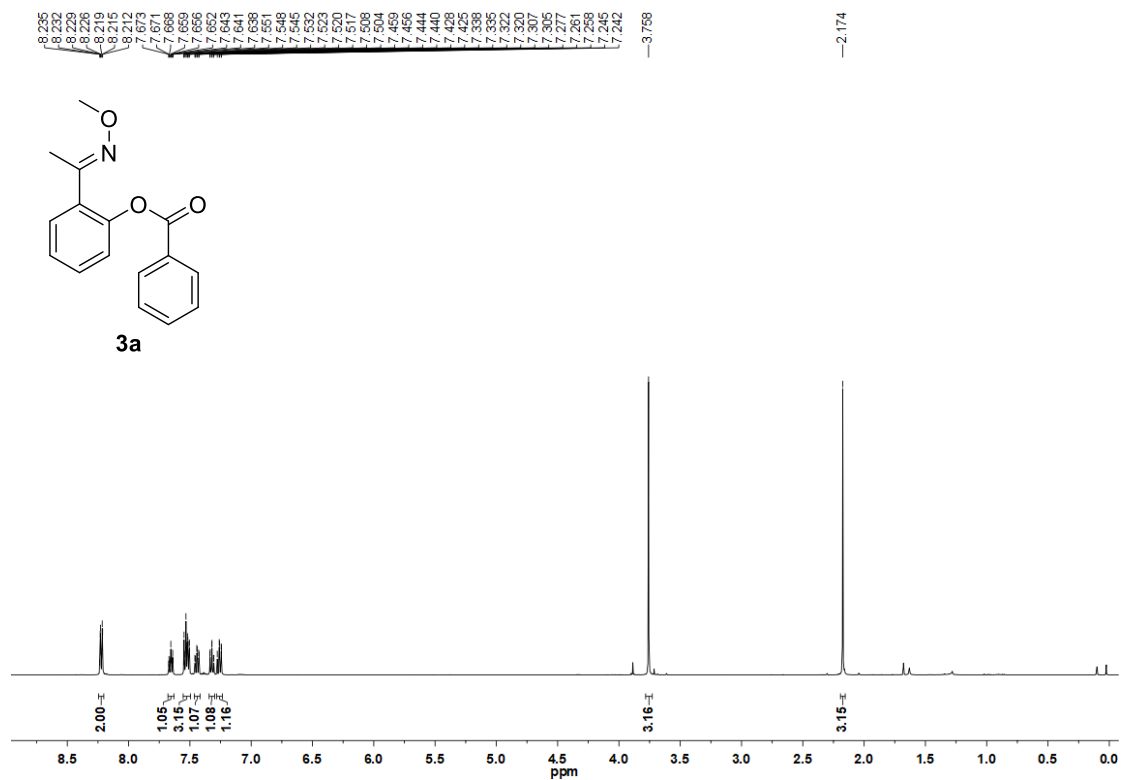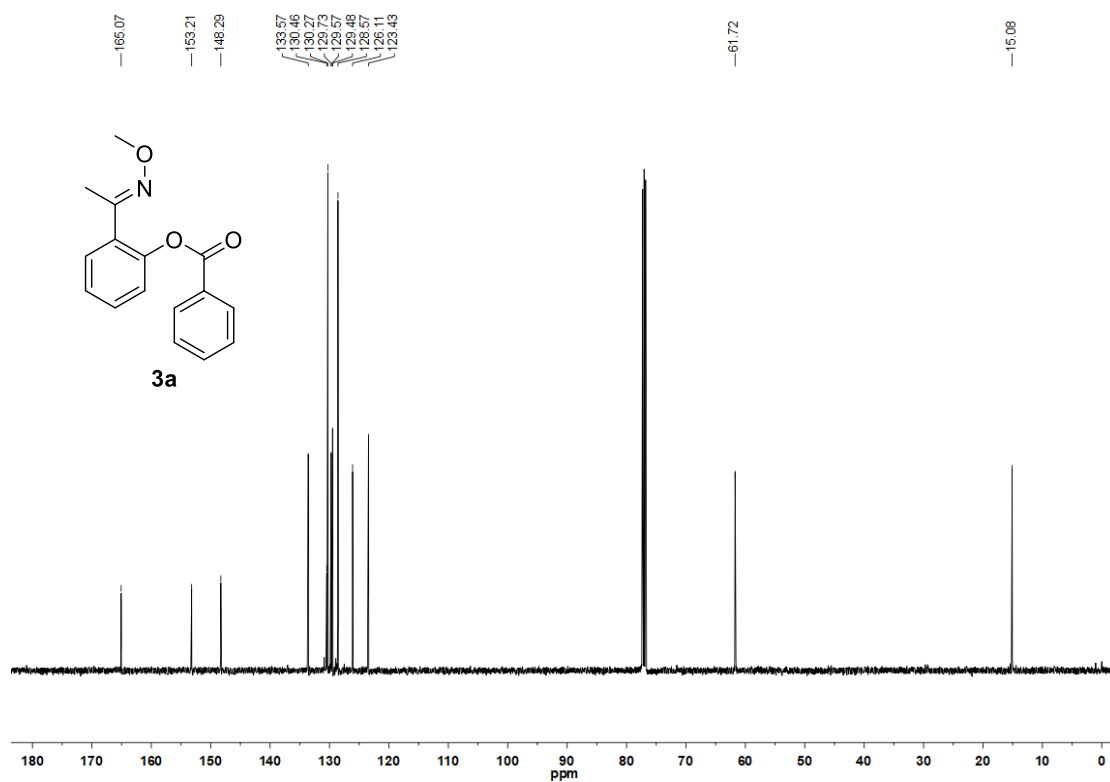

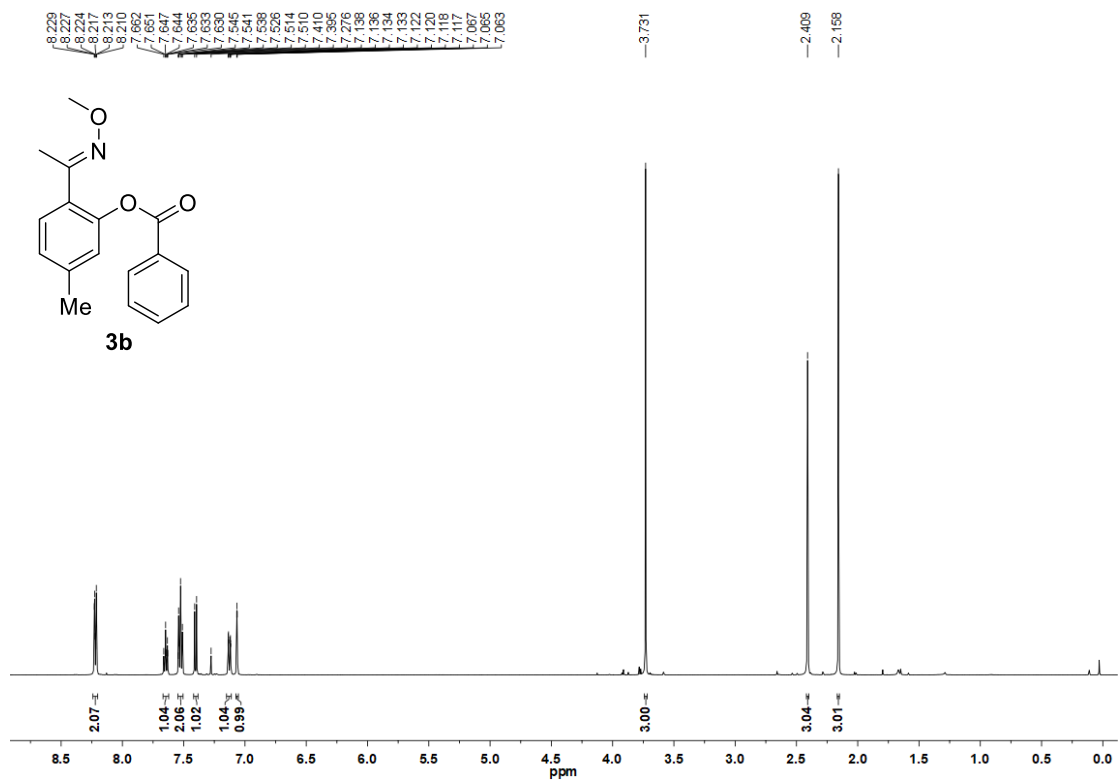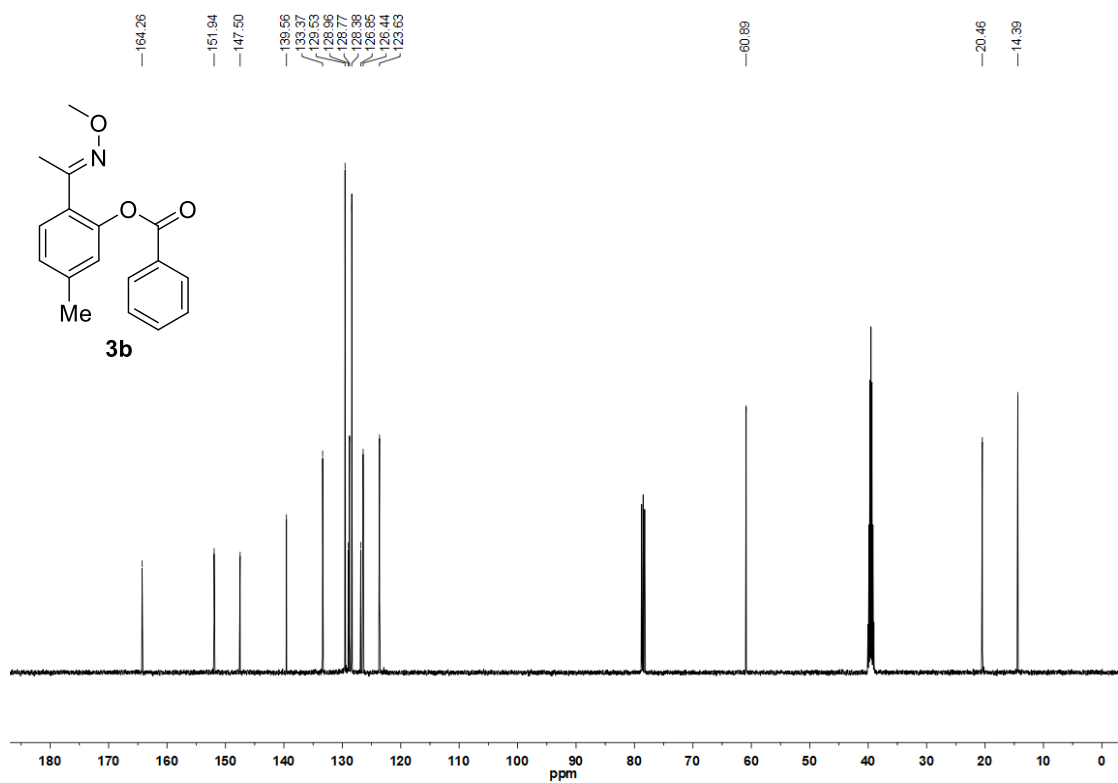

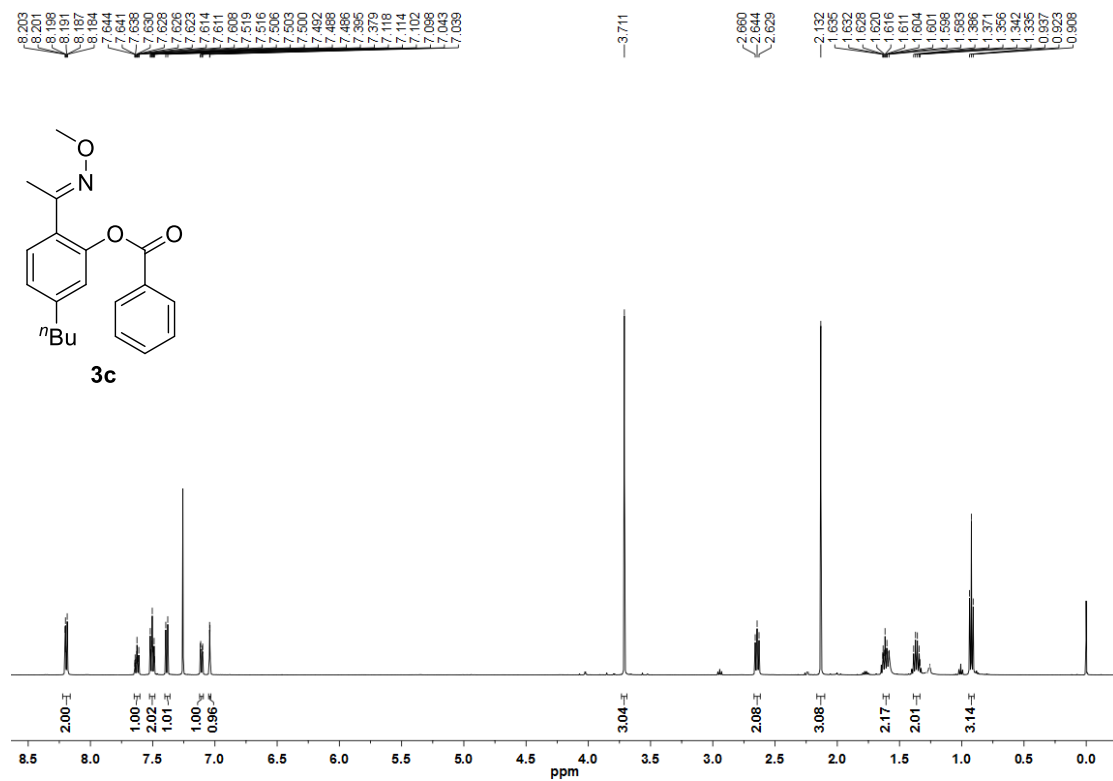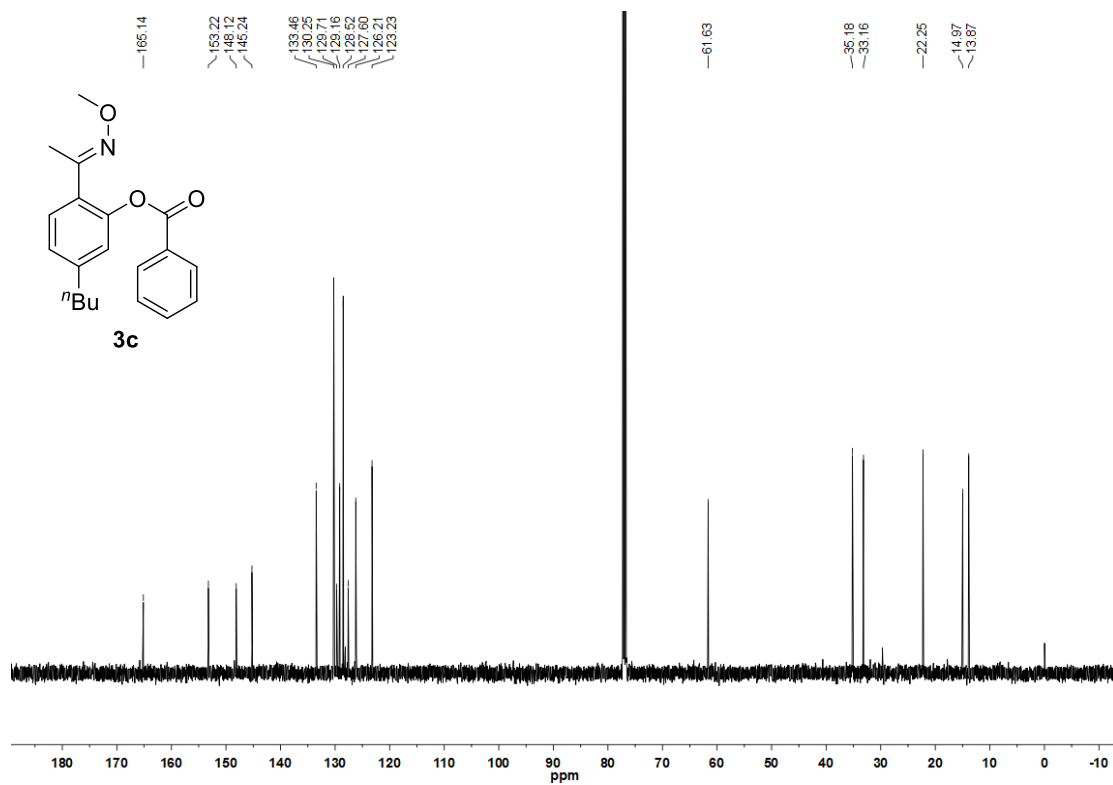

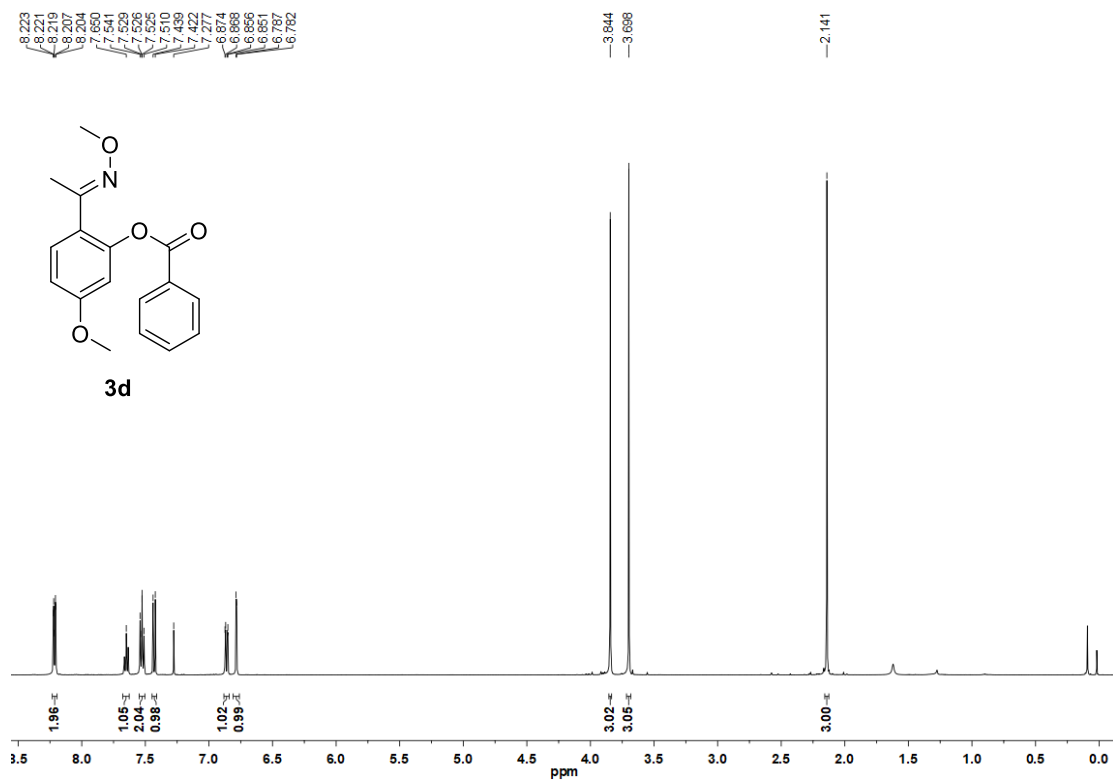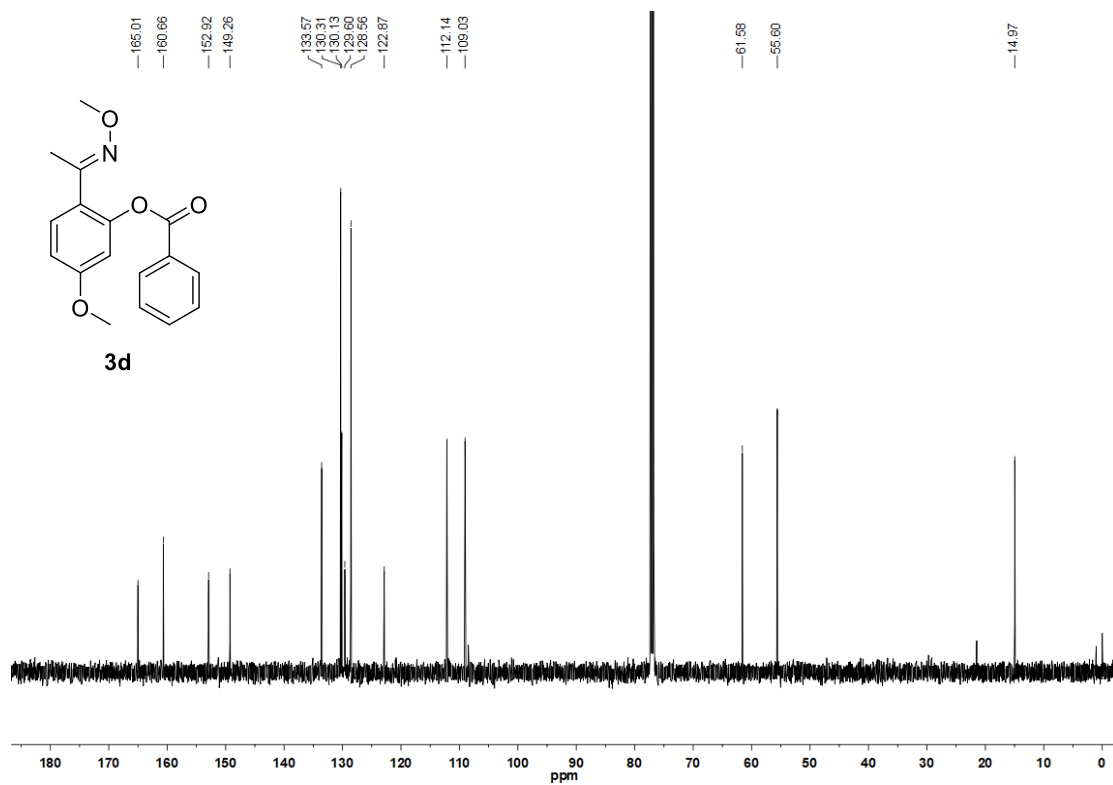

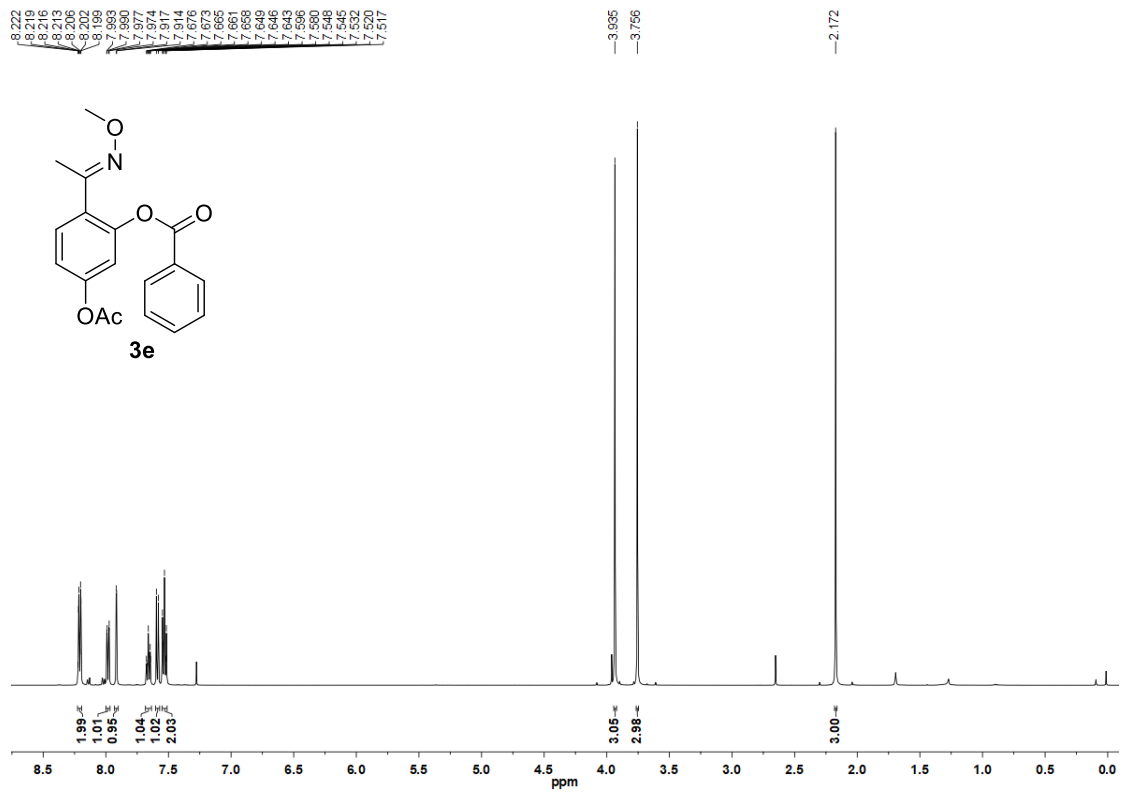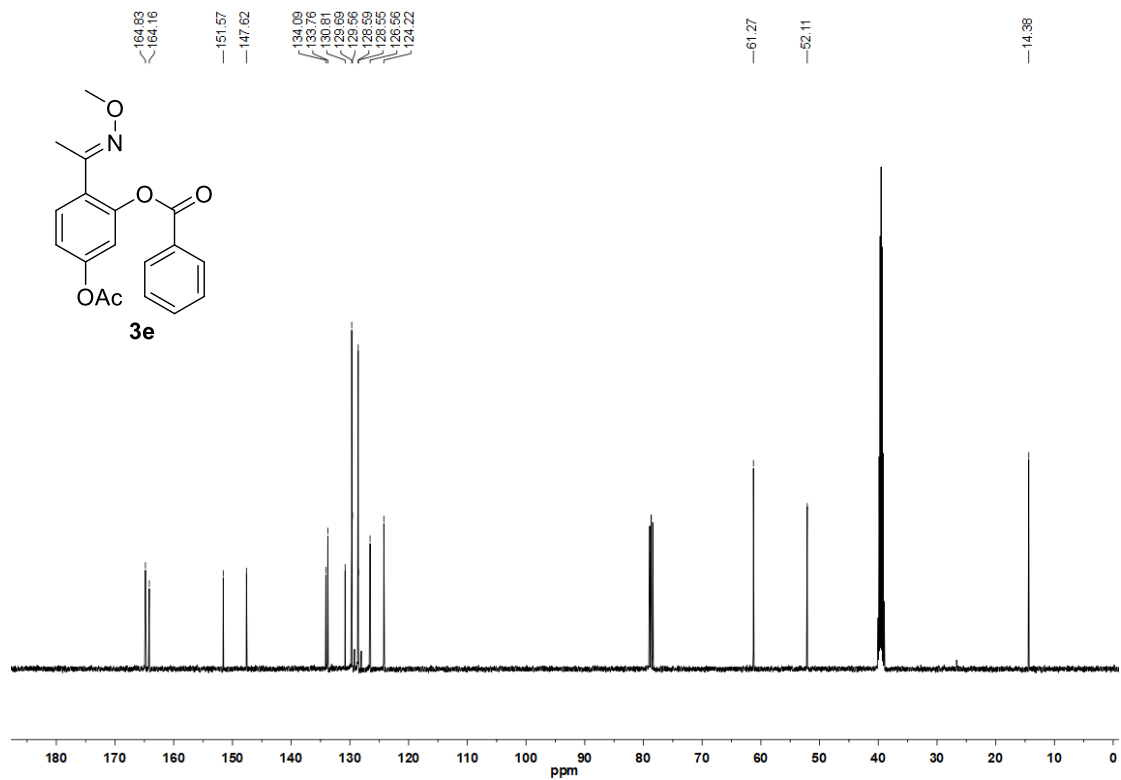

8.270  
8.267  
8.257  
8.253  
8.250  
7.888  
7.885  
7.882  
7.674  
7.670  
7.666  
7.658  
7.653  
7.647  
7.645  
7.611  
7.595  
7.575  
7.571  
7.566  
7.559  
7.555  
7.549  
7.539  
7.535  
7.488  
7.485  
7.486  
7.482  
7.471  
7.469  
7.465  
7.412  
7.409  
7.407  
7.399  
7.395  
7.390  
7.383  
7.370  
7.377  
-3.771

-2.222

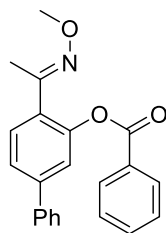

3f

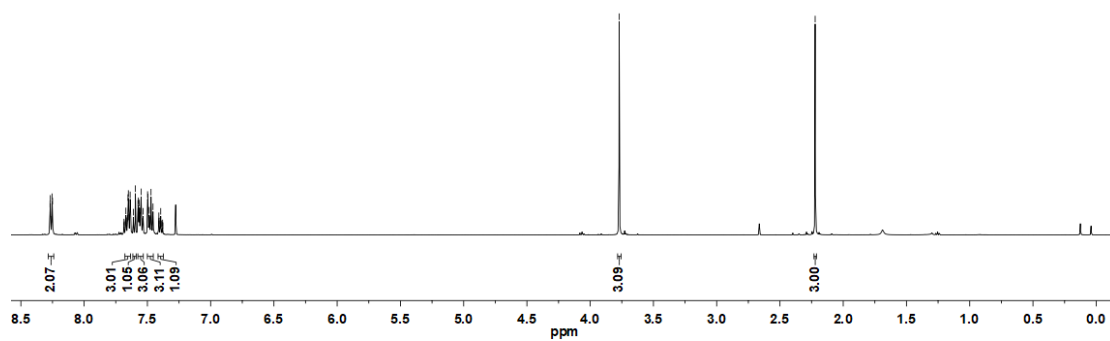

165.105  
152.916  
148.577  
142.962  
139.510  
133.590  
130.277  
129.771  
129.645  
129.045  
128.847  
128.564  
127.904  
127.095  
124.885  
122.041

-61.728

-14.915

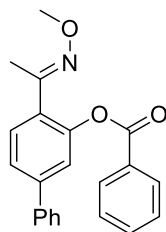

3f

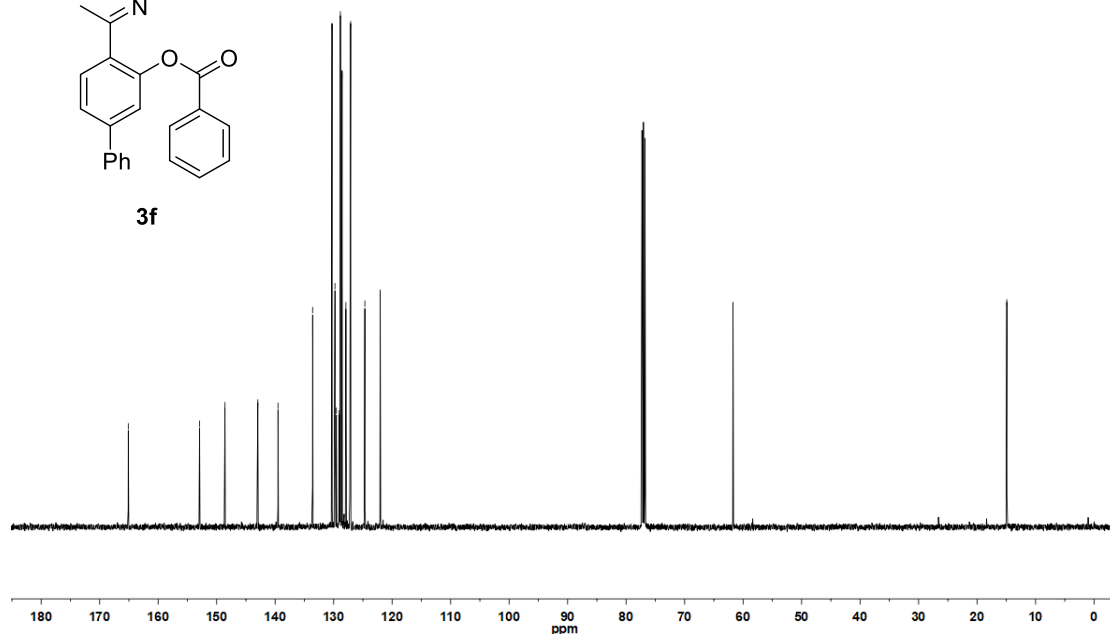

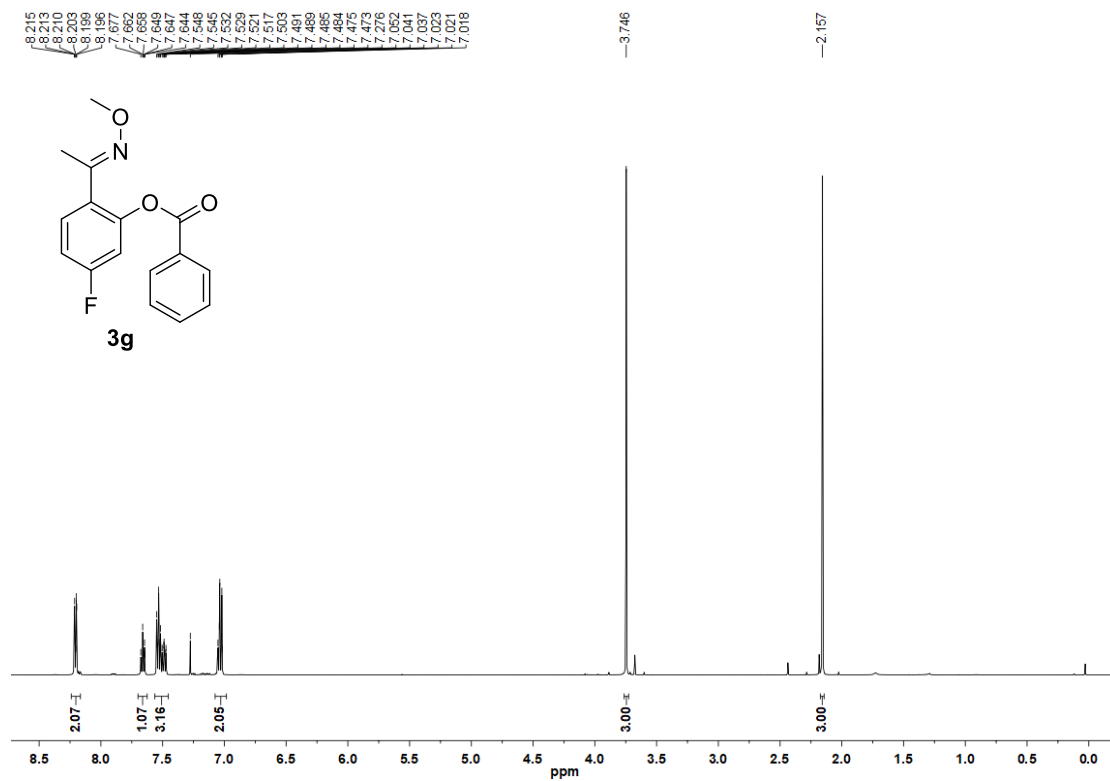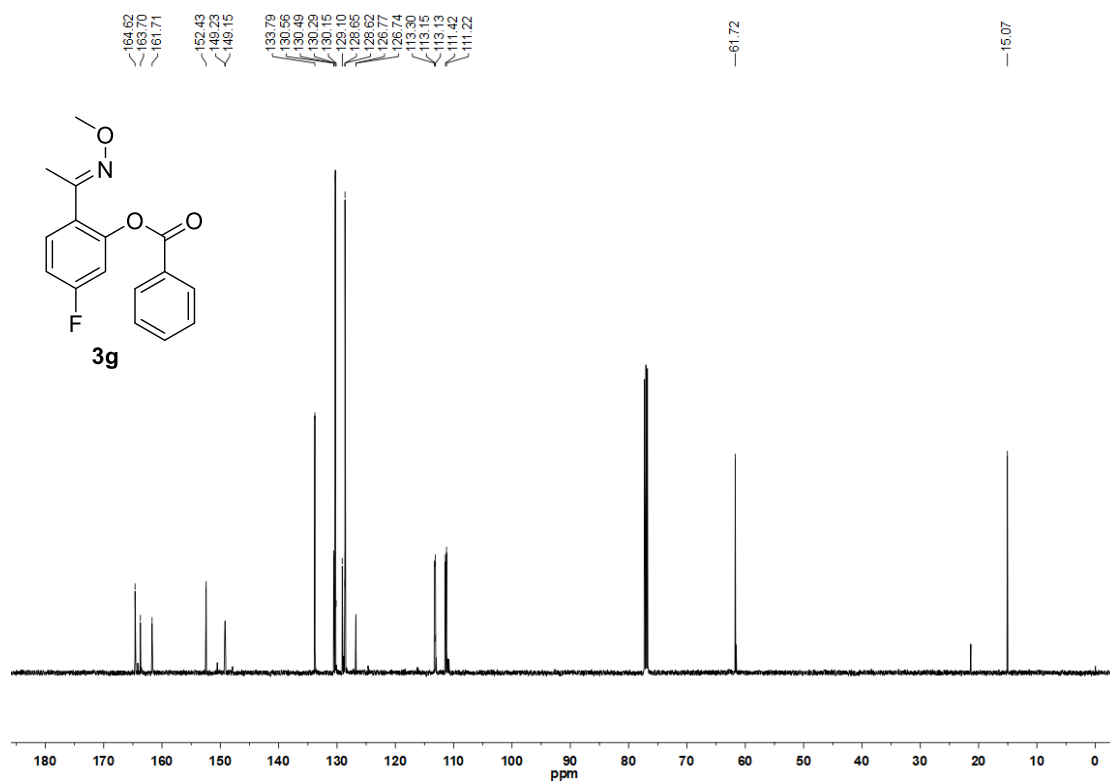



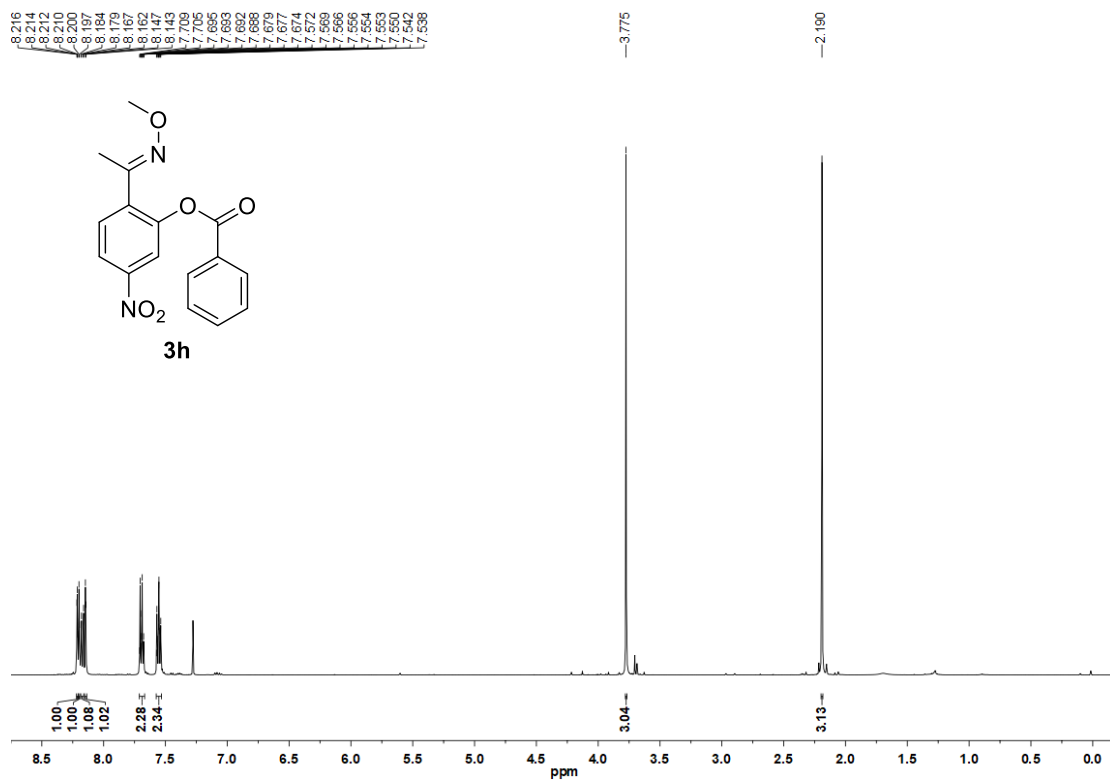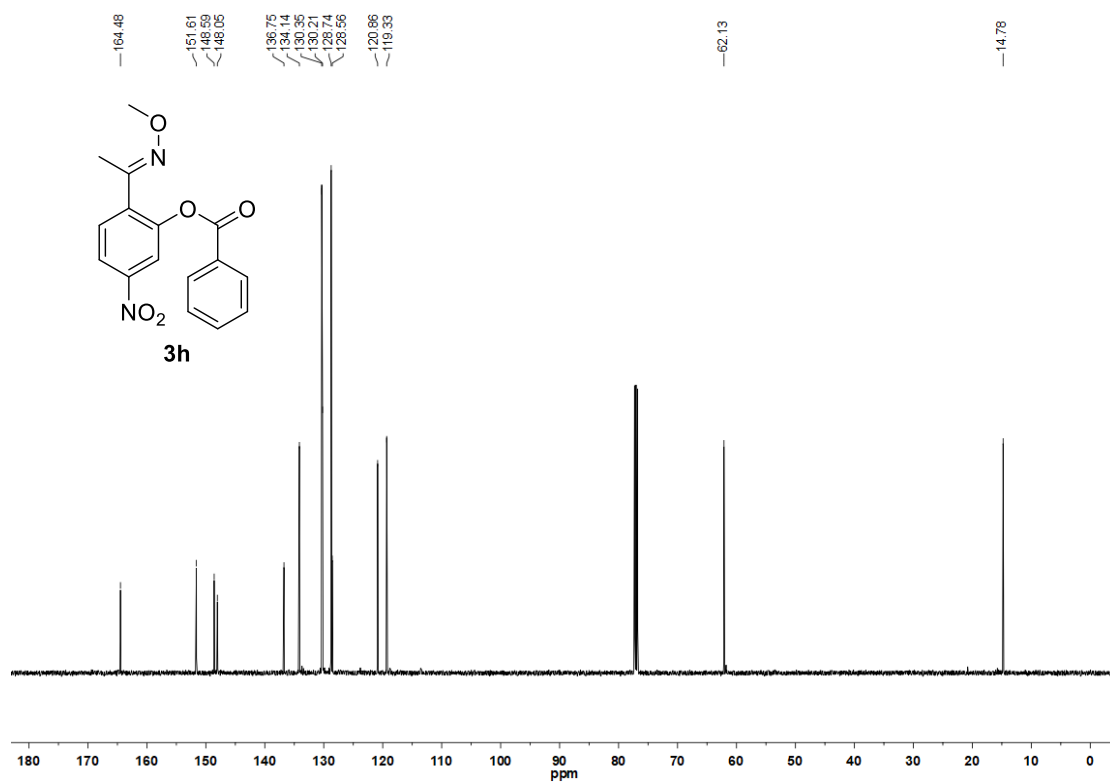

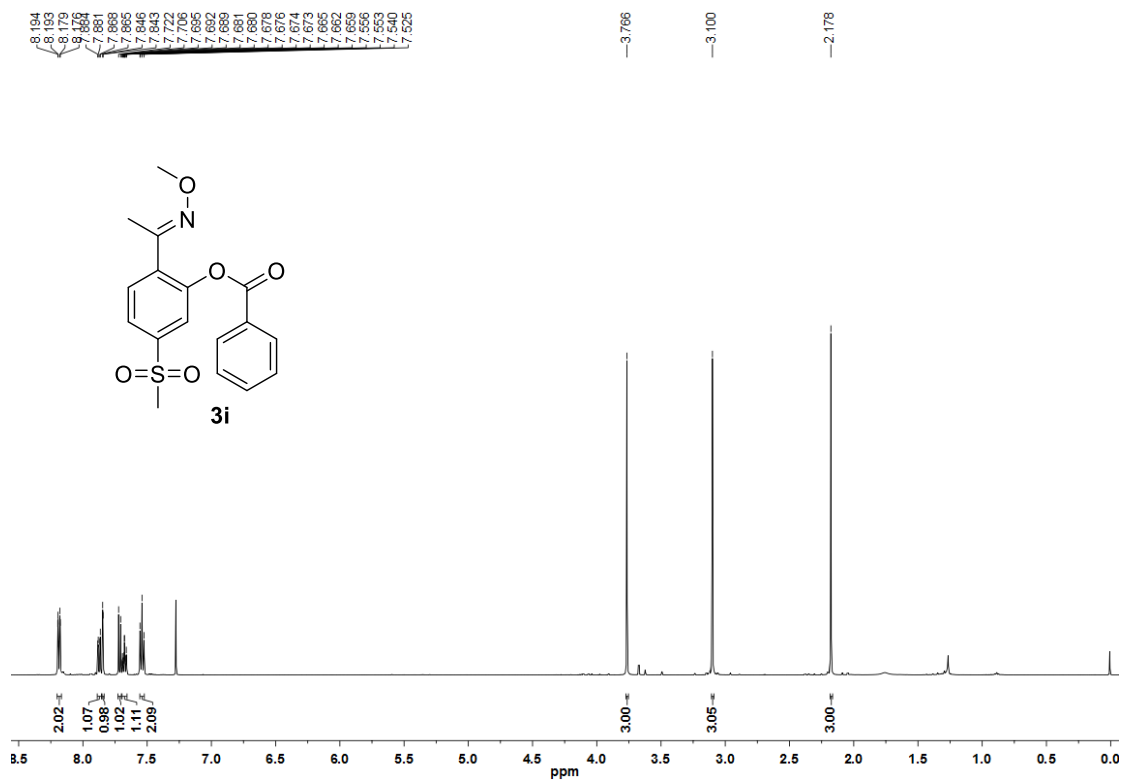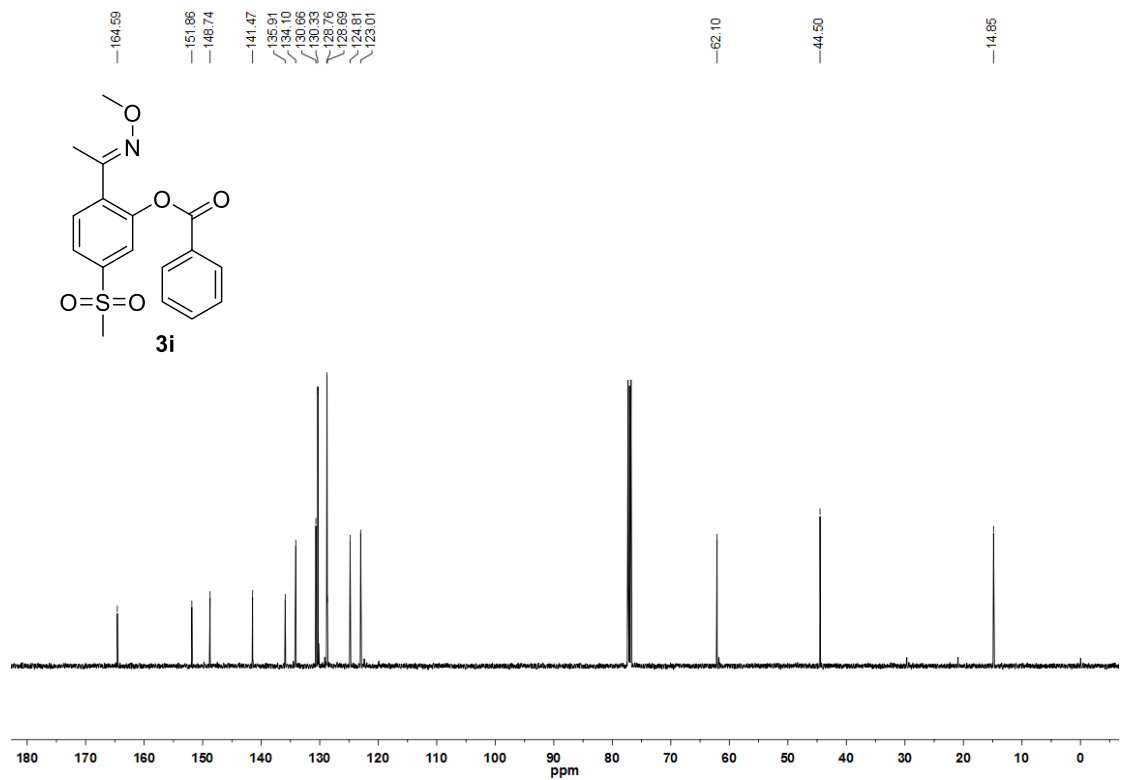

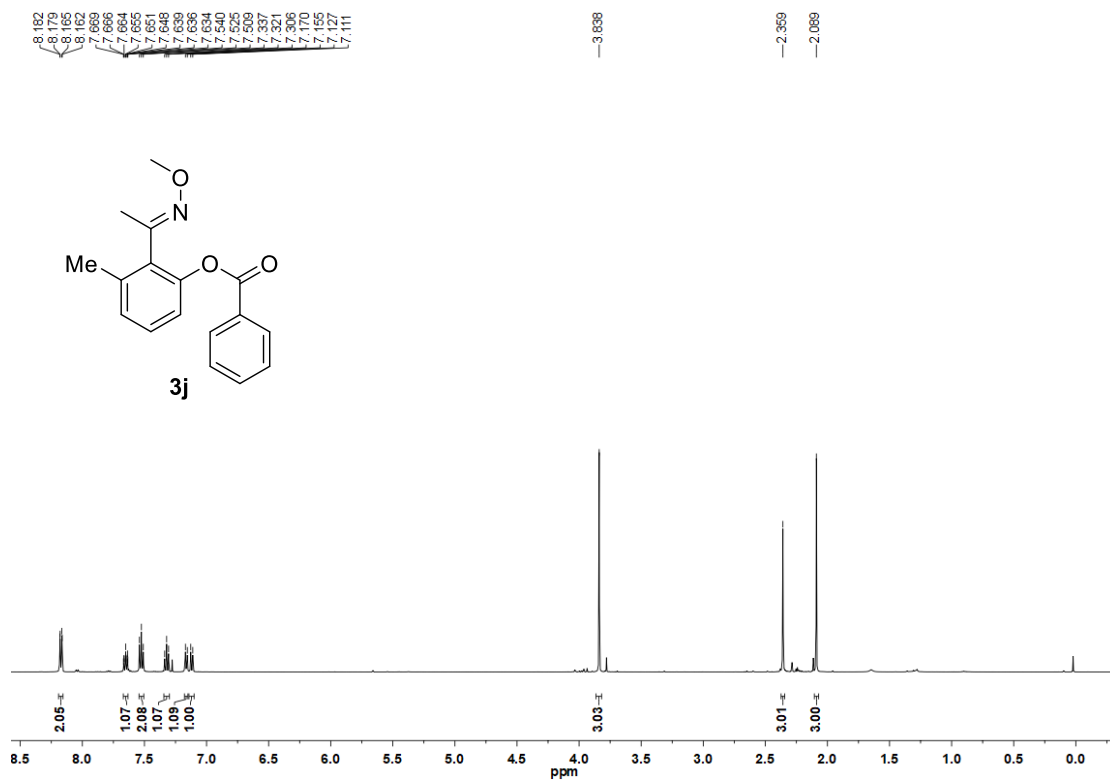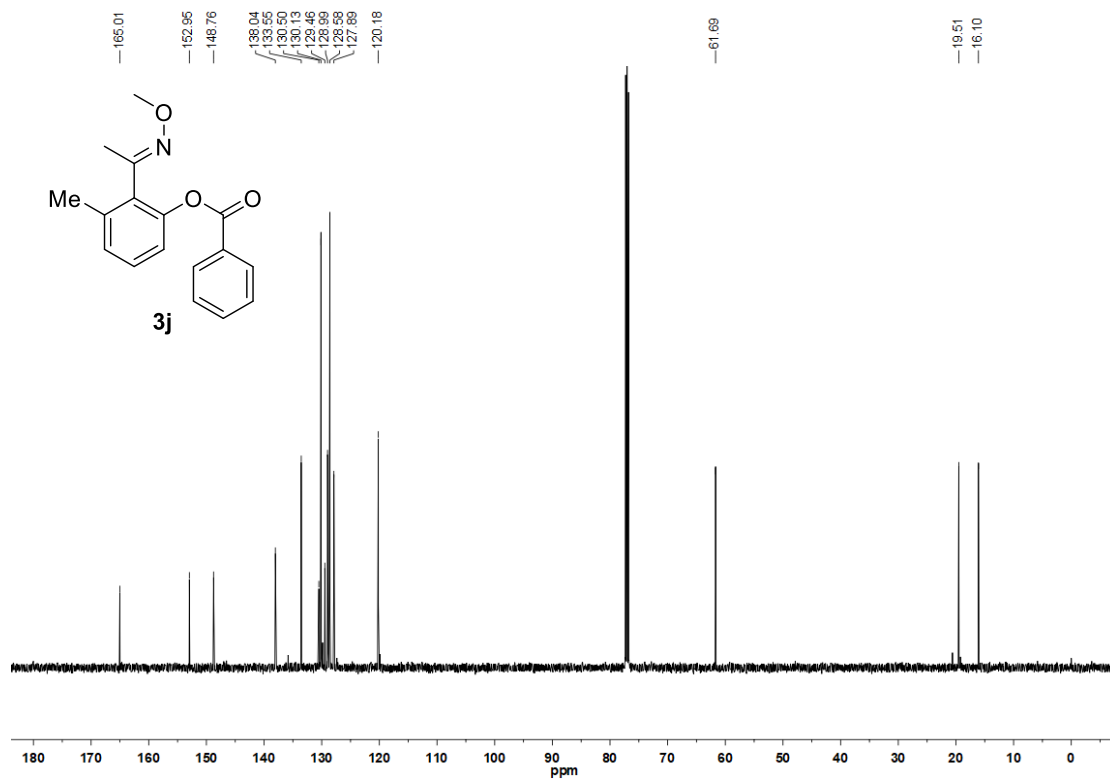

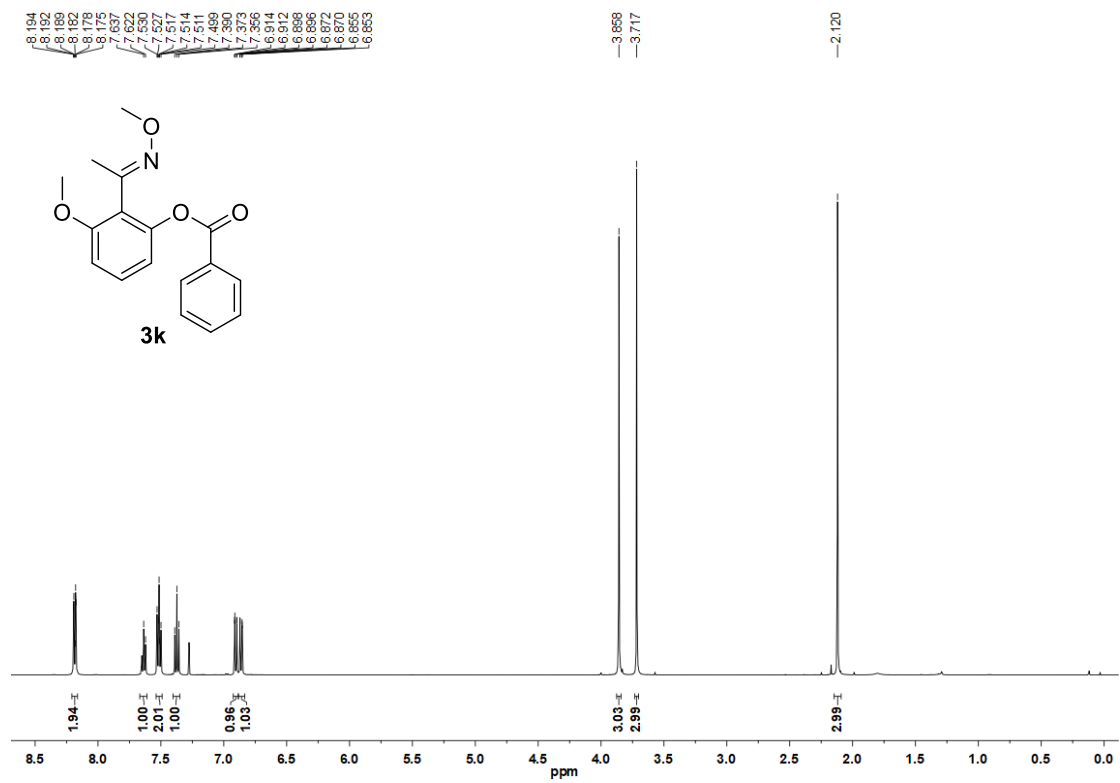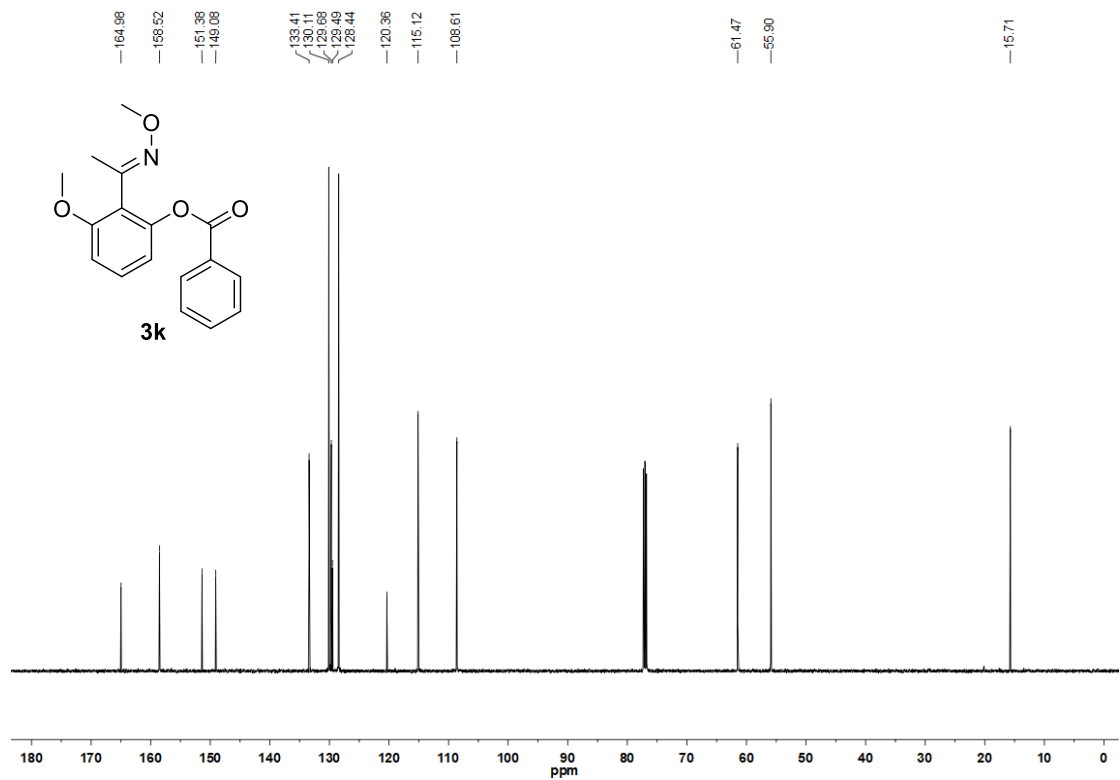

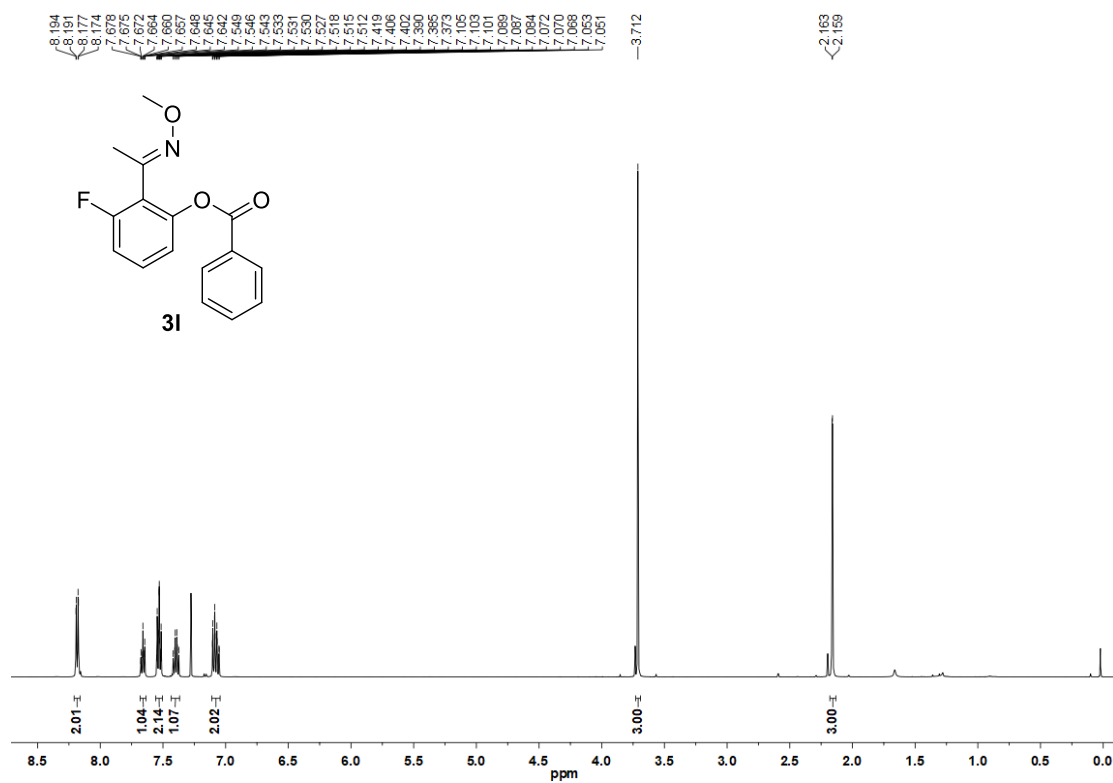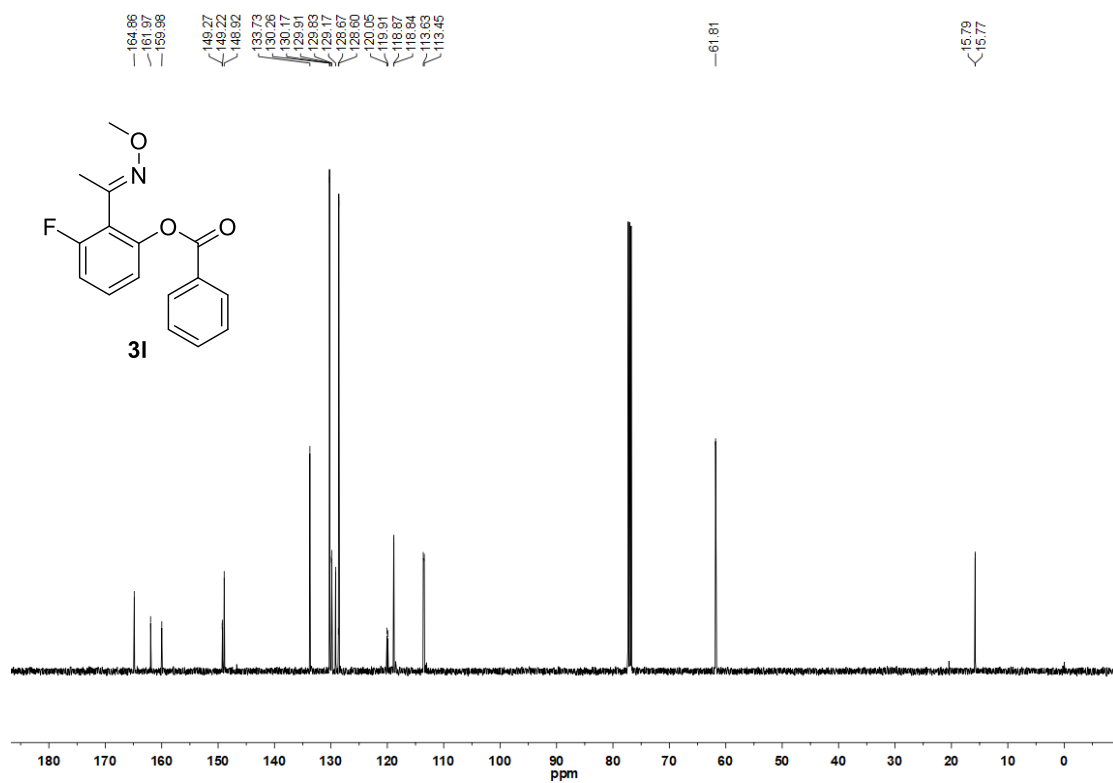

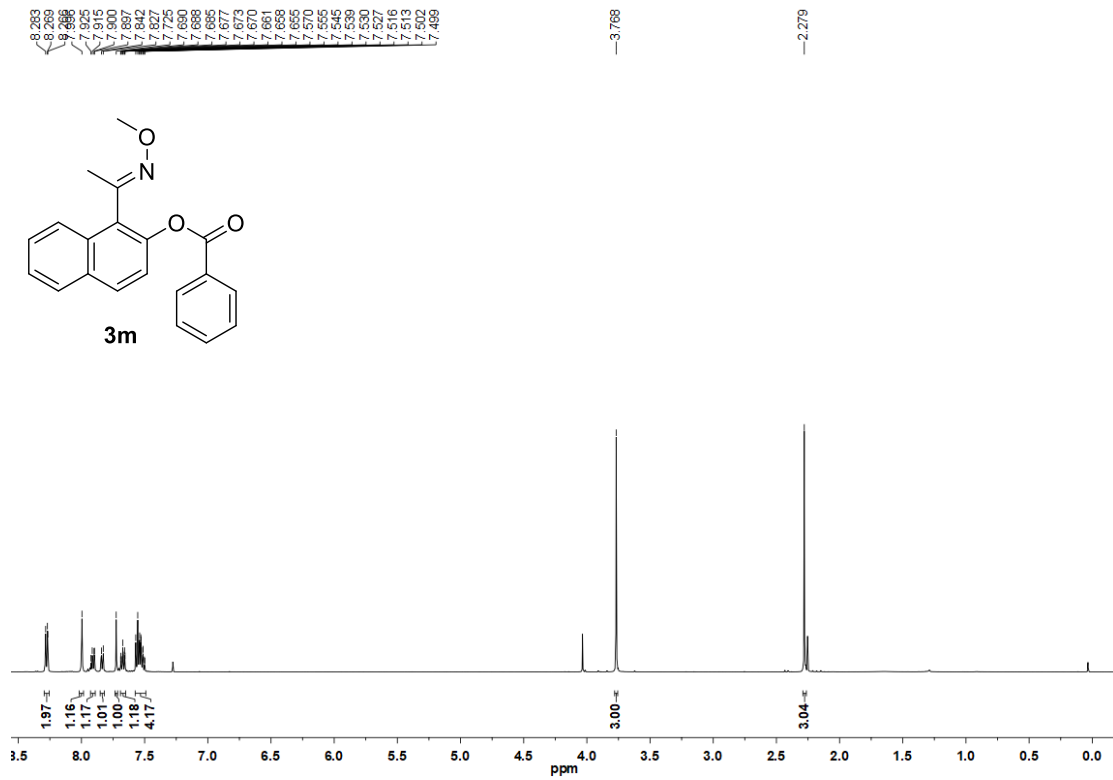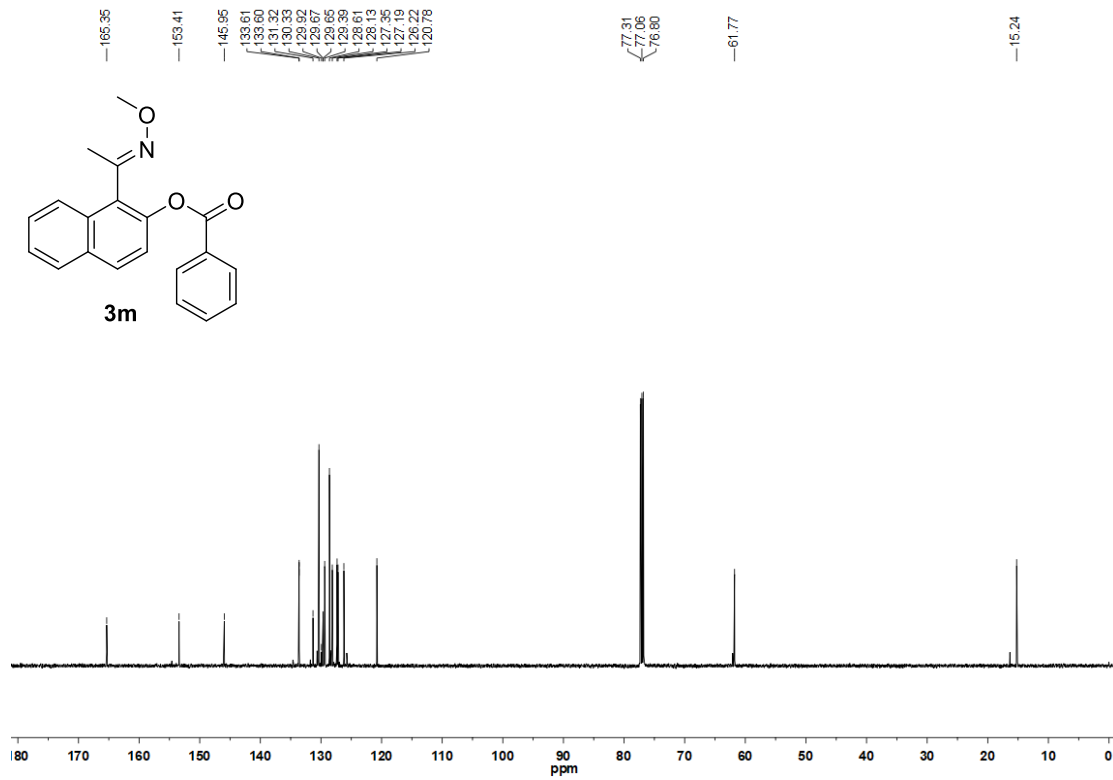

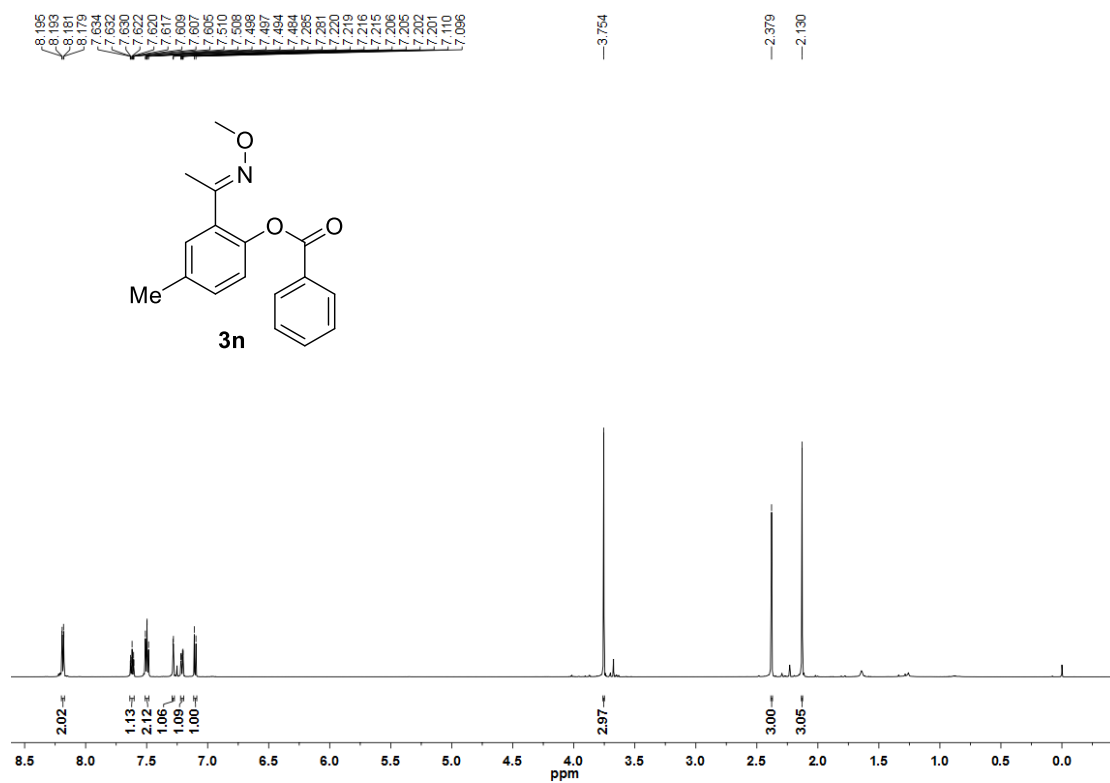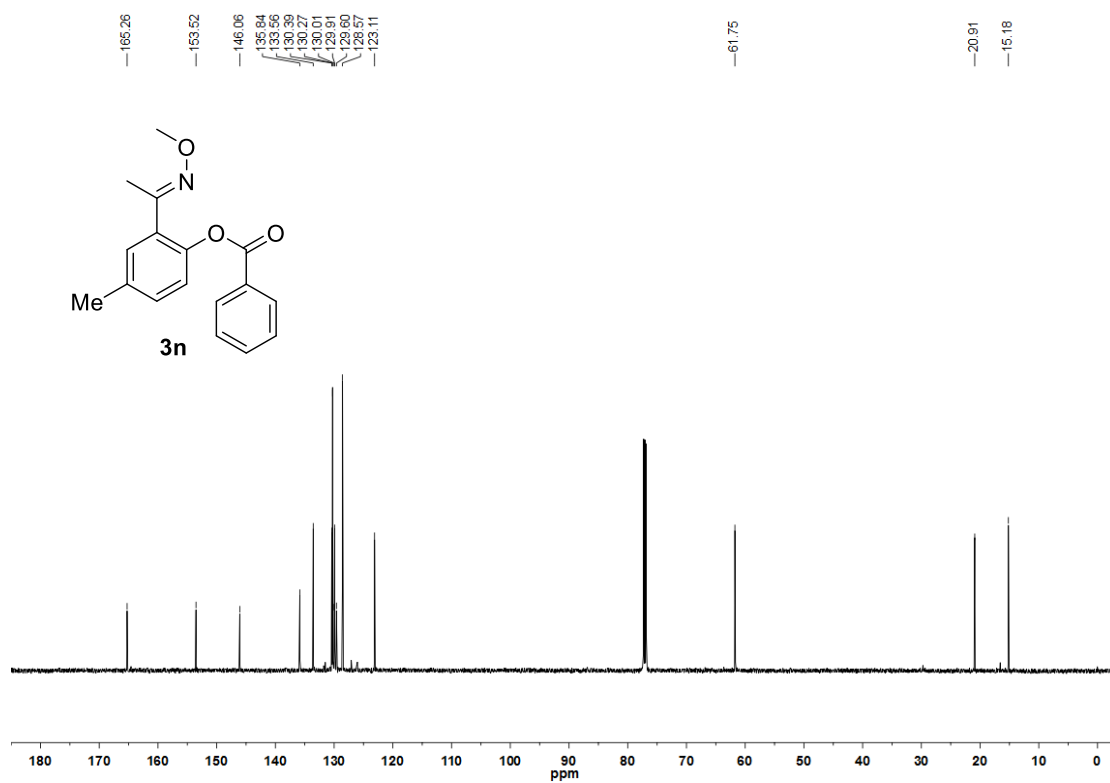

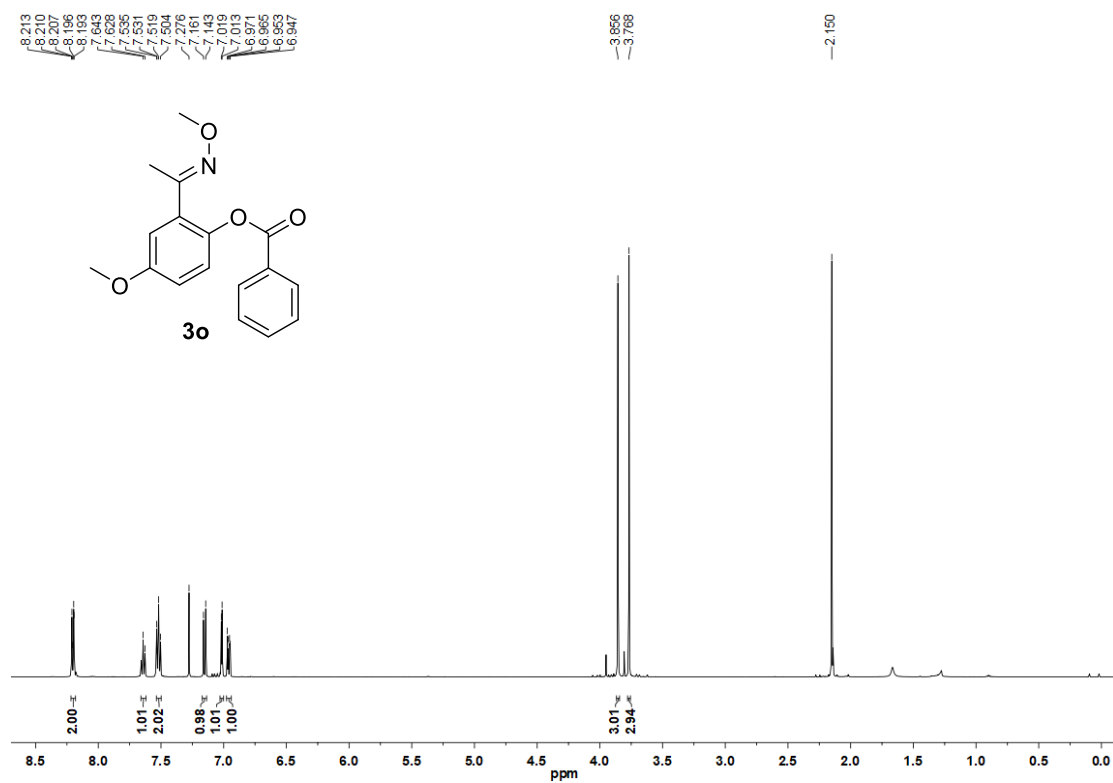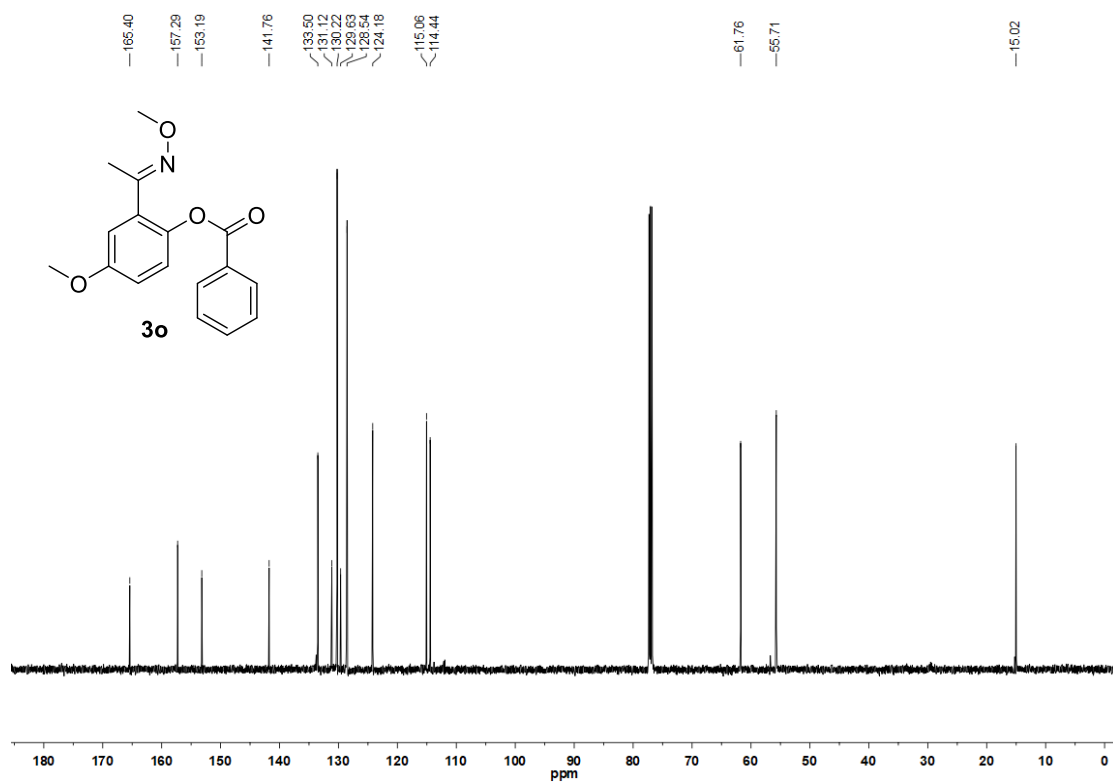



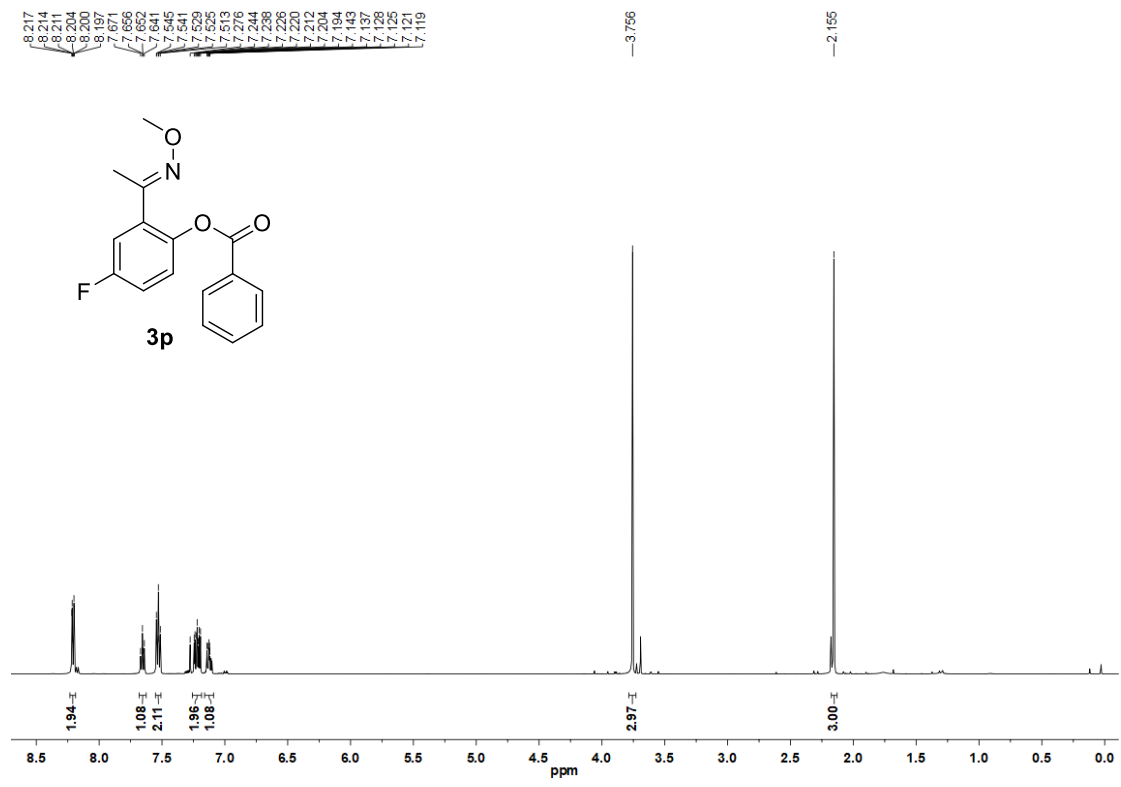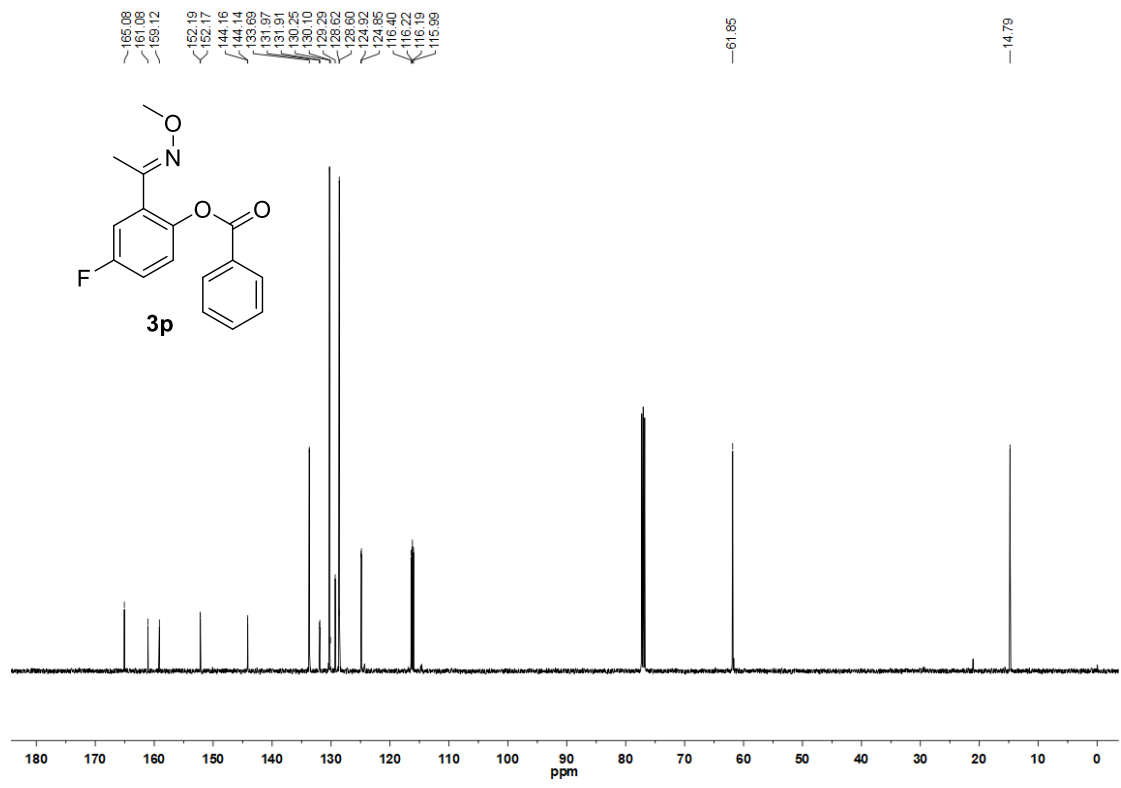

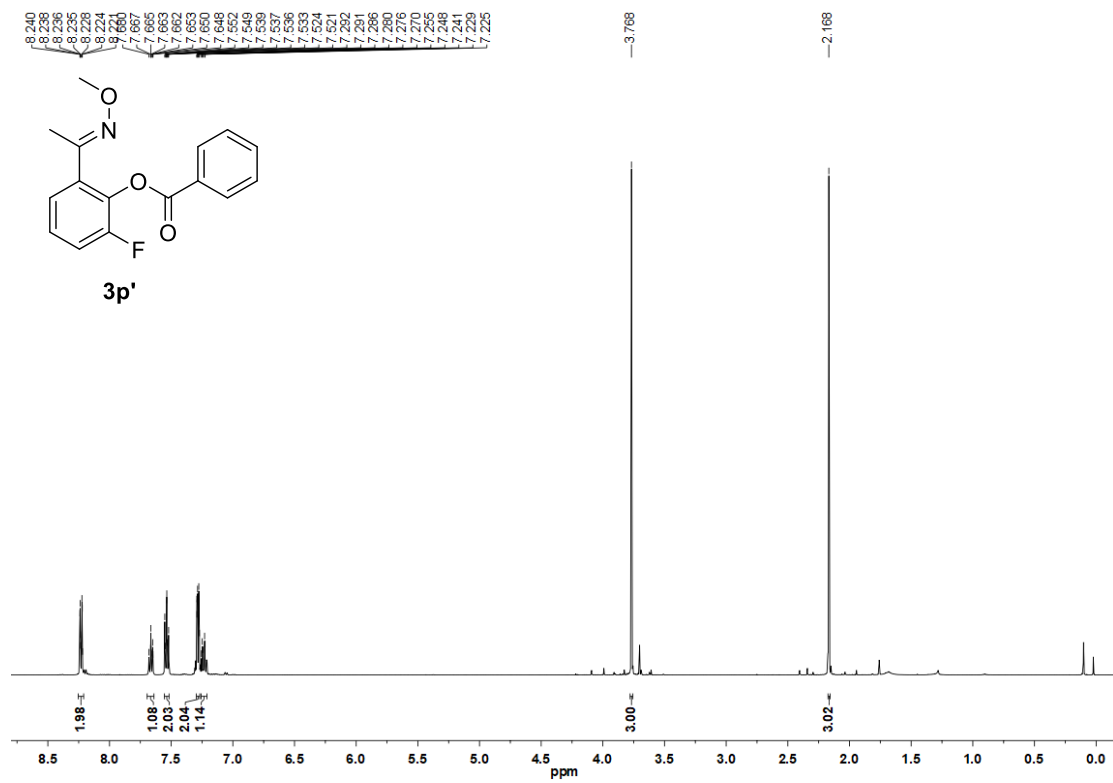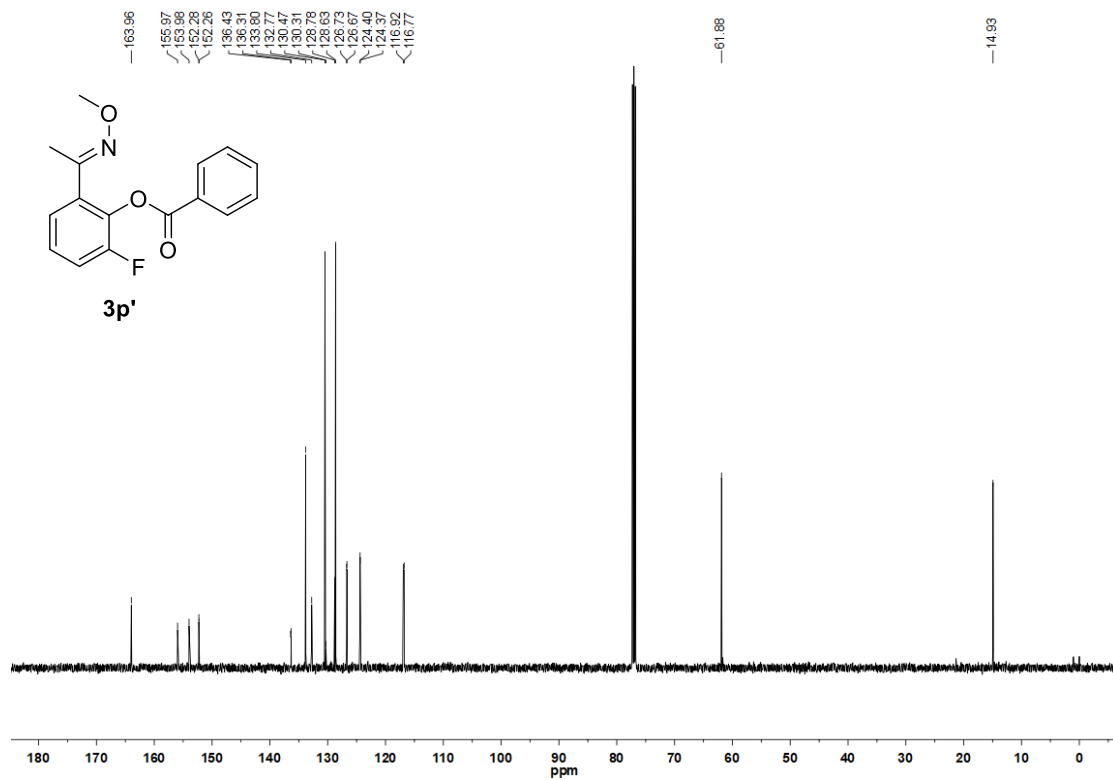

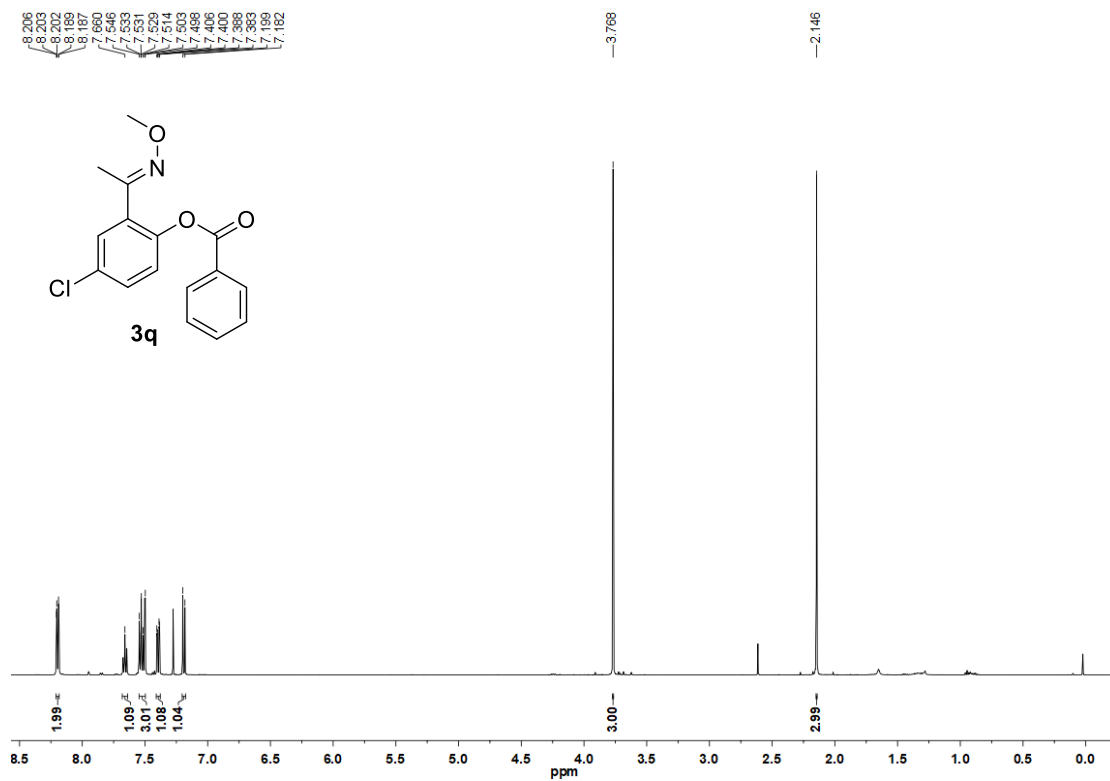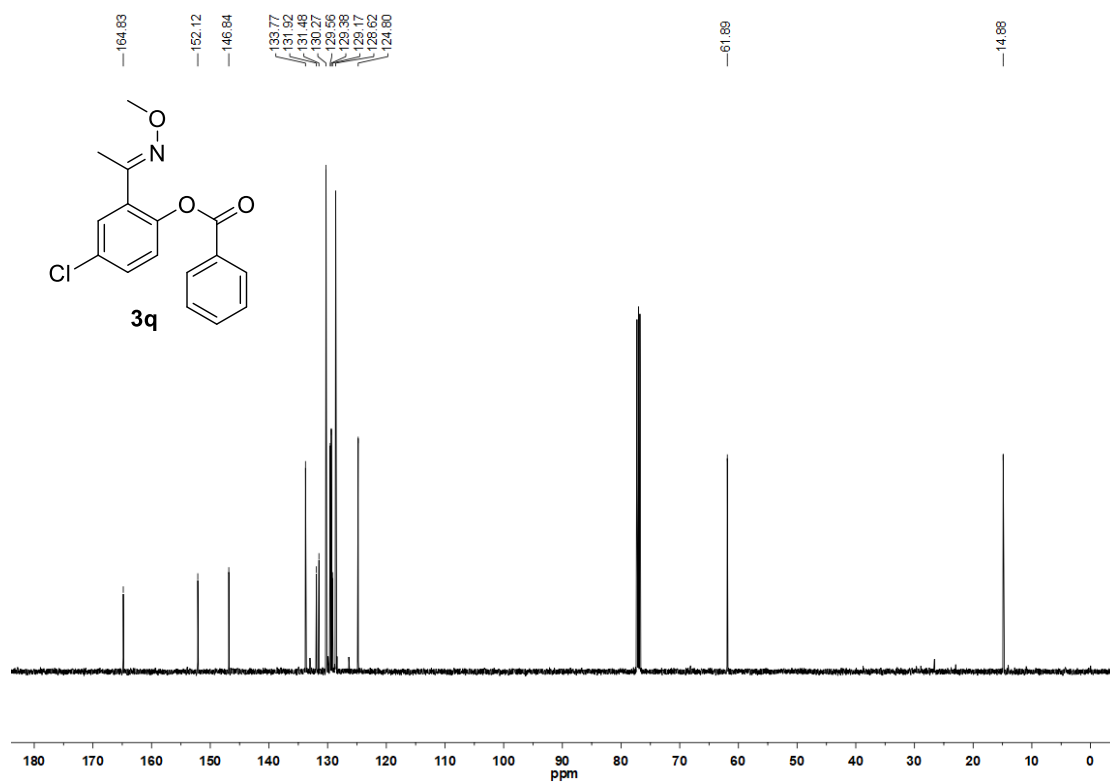

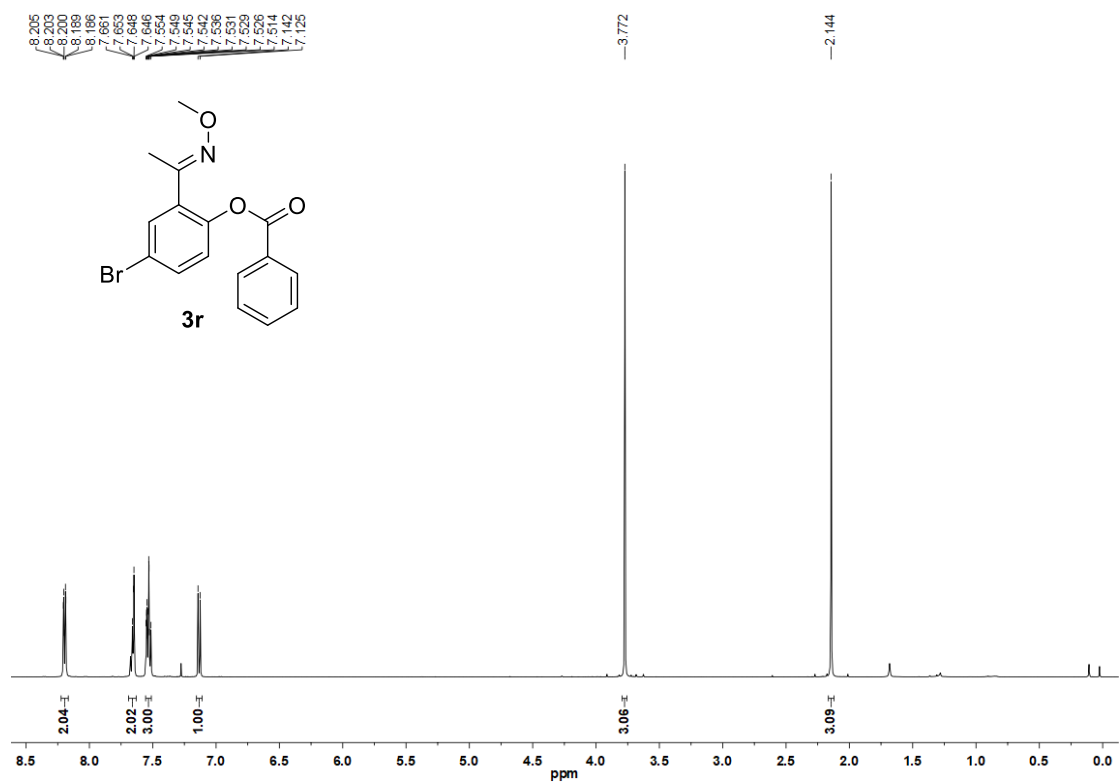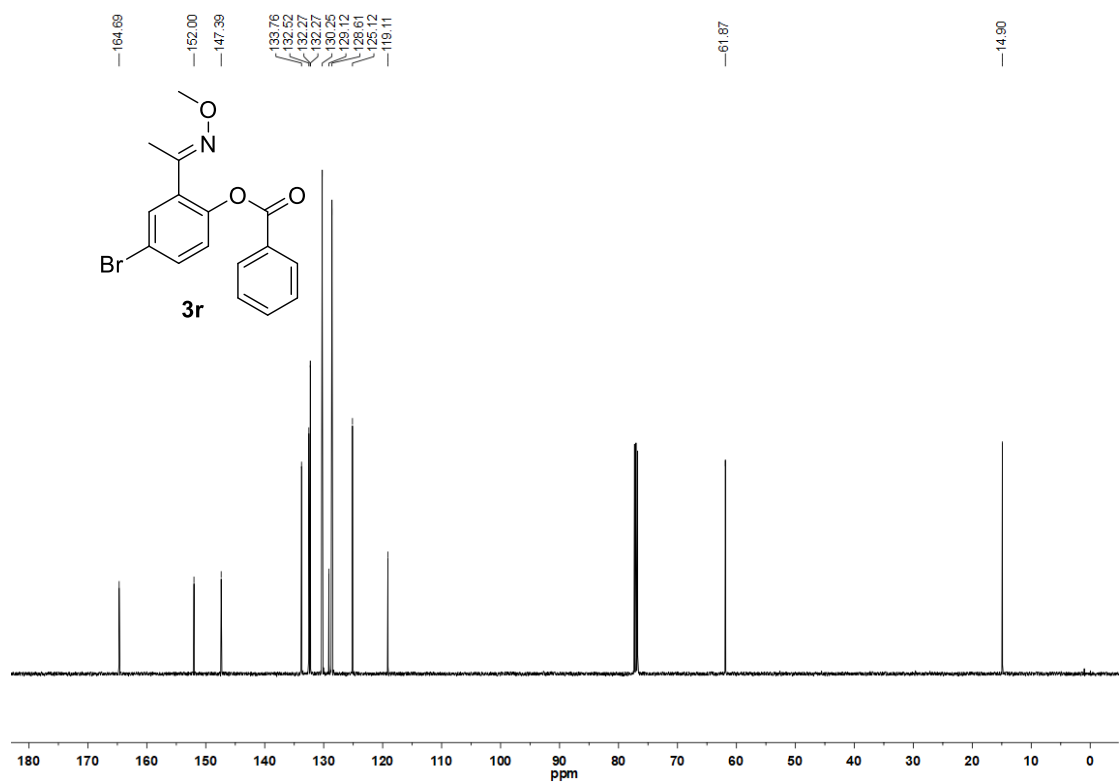

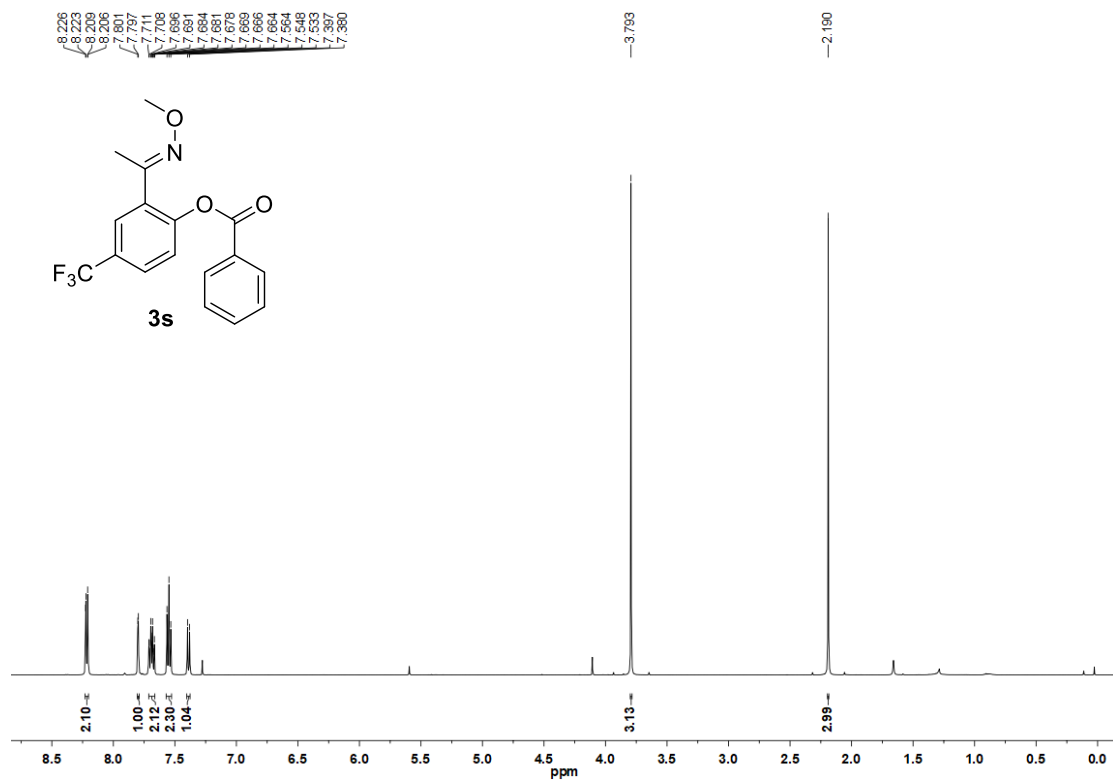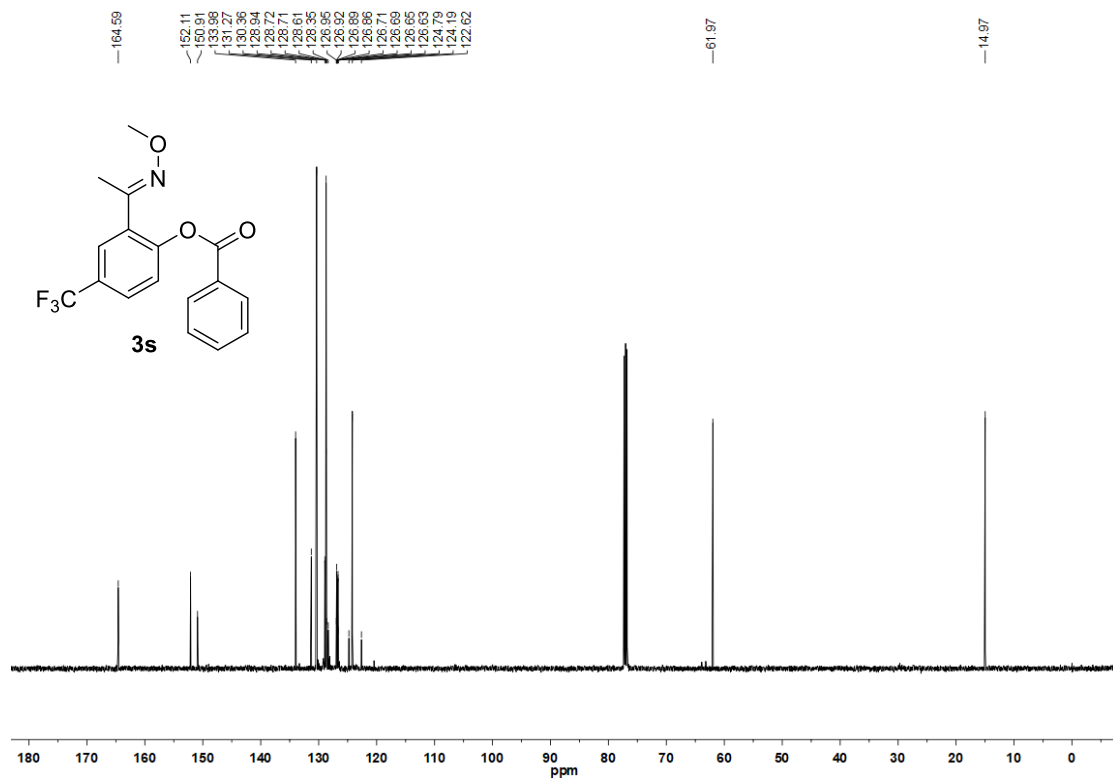

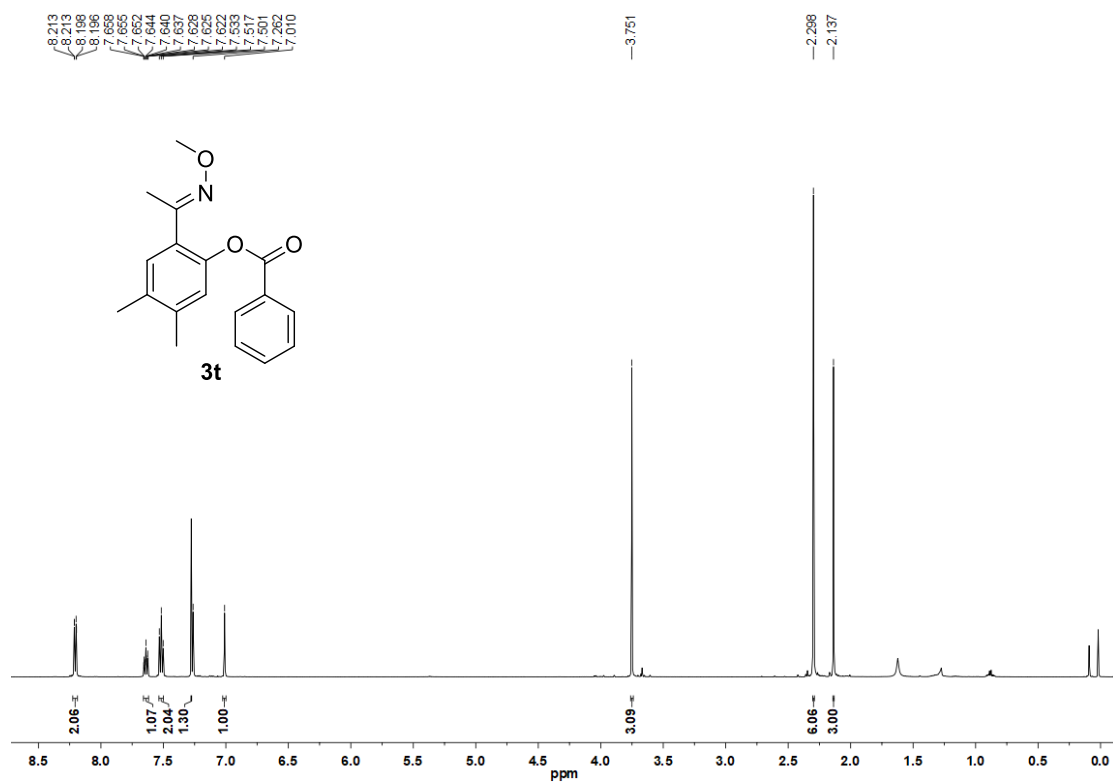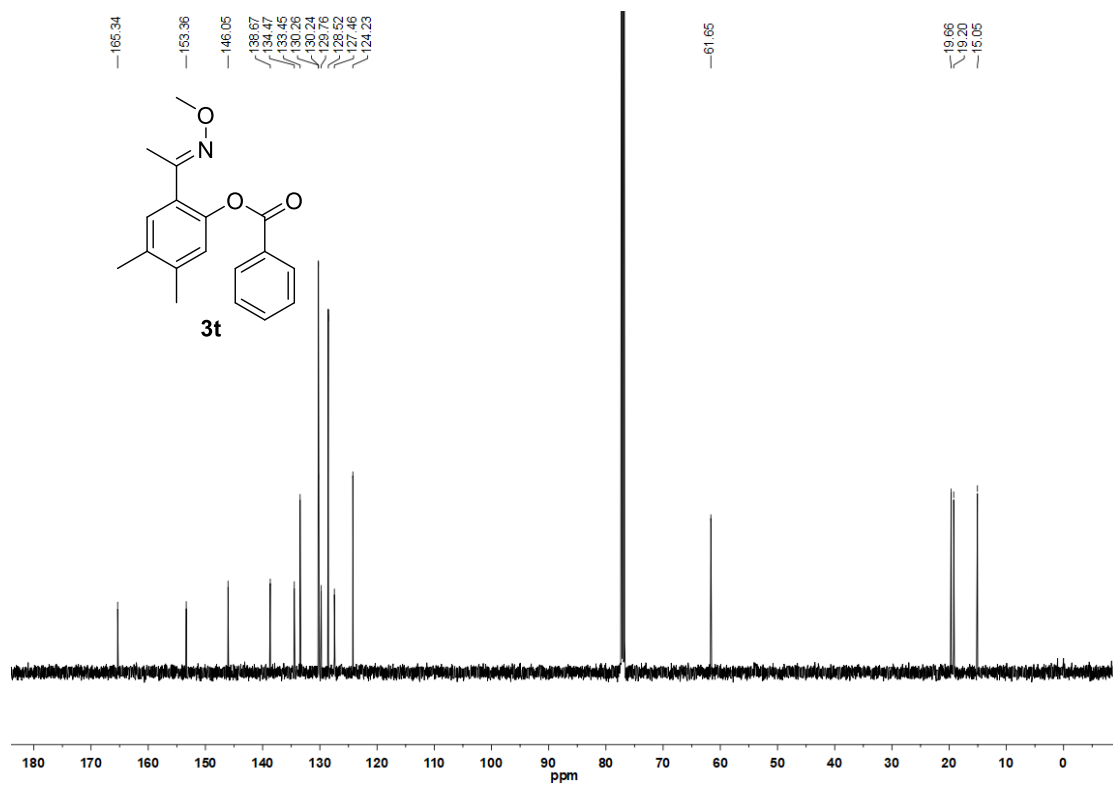

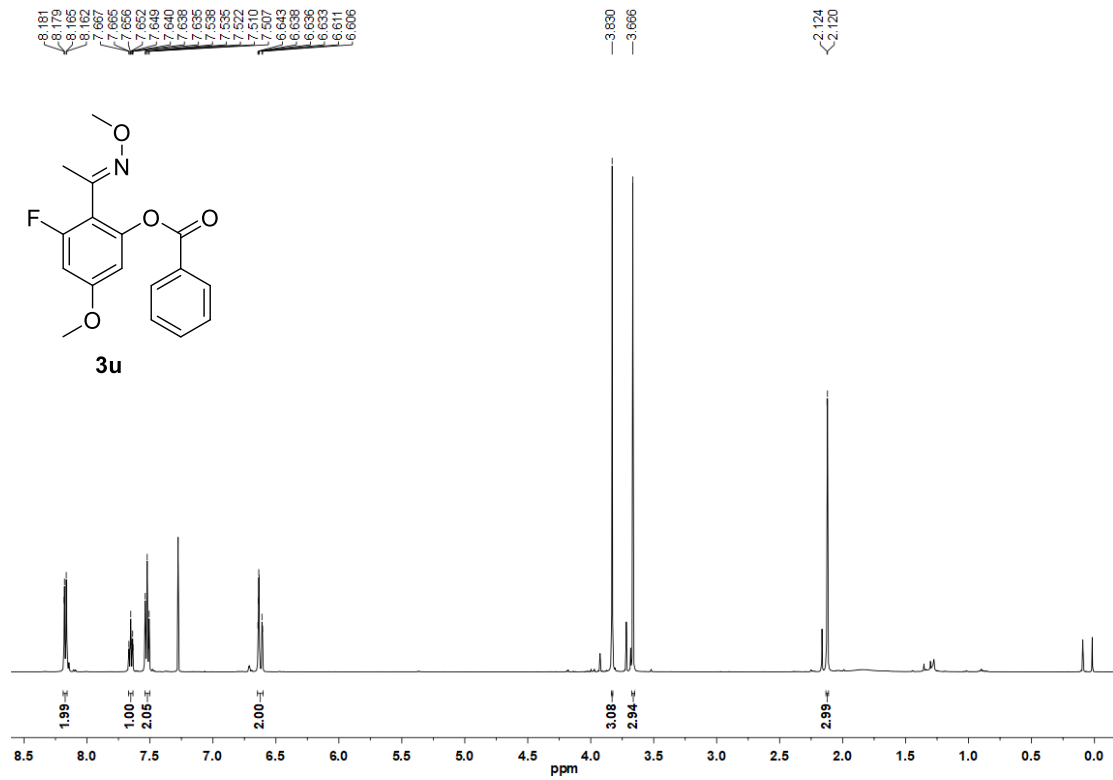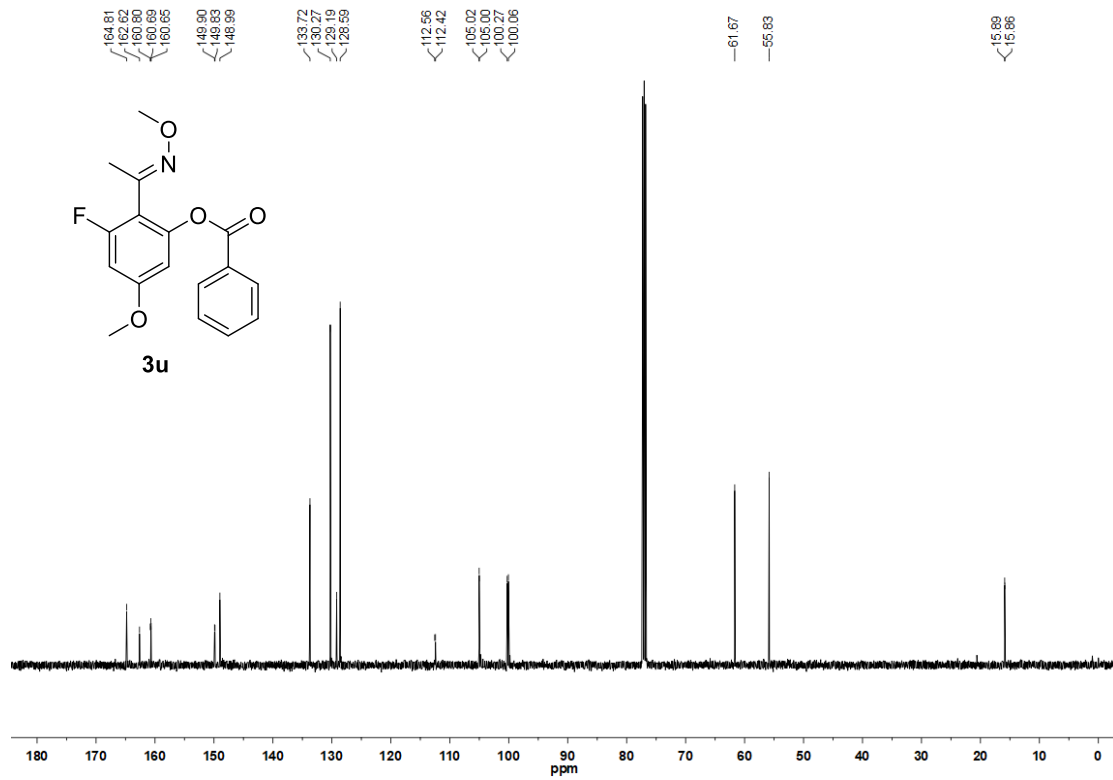

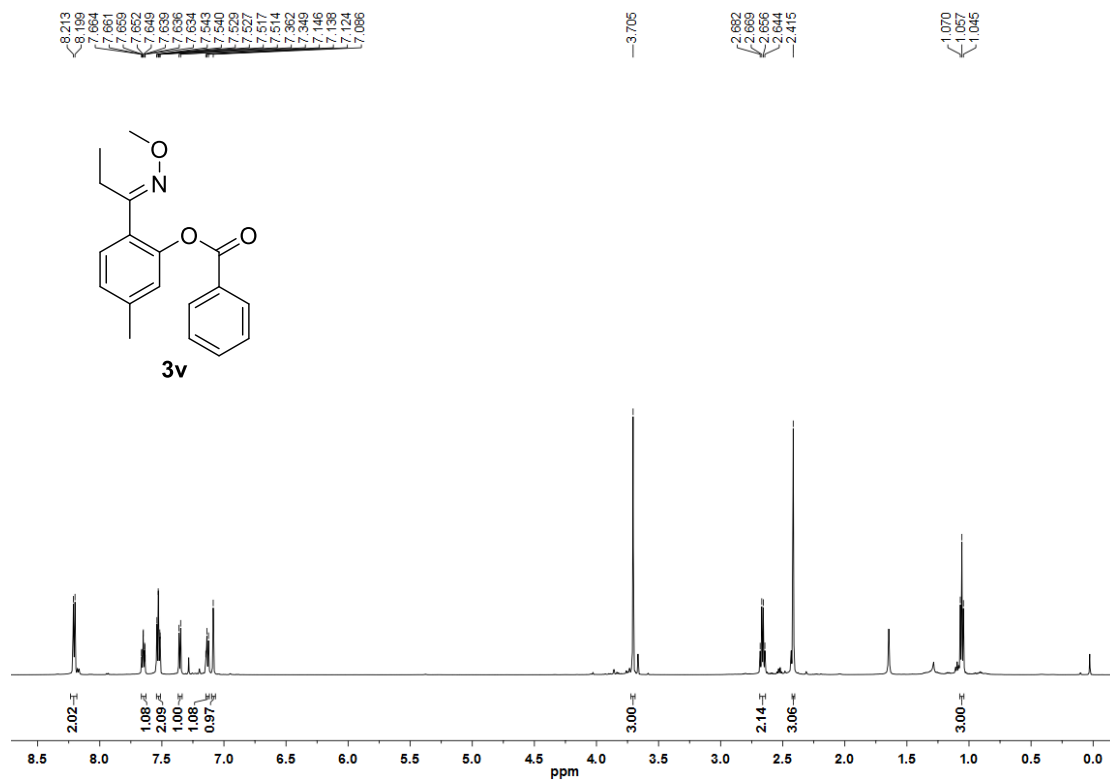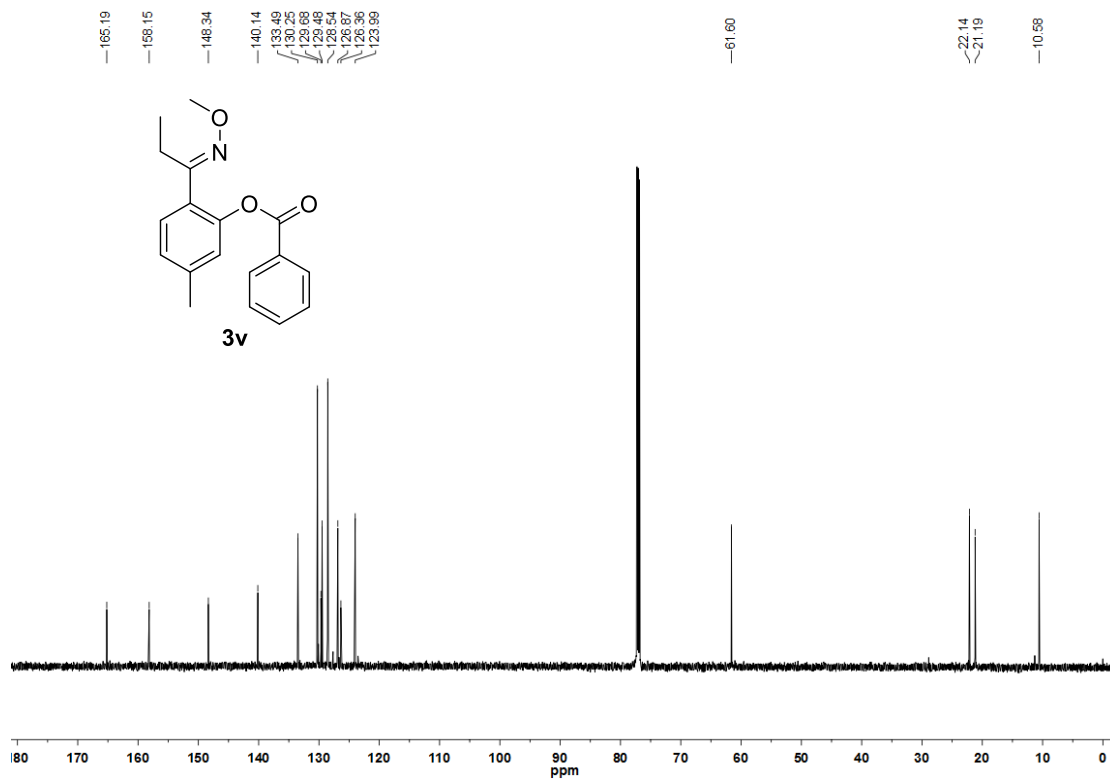



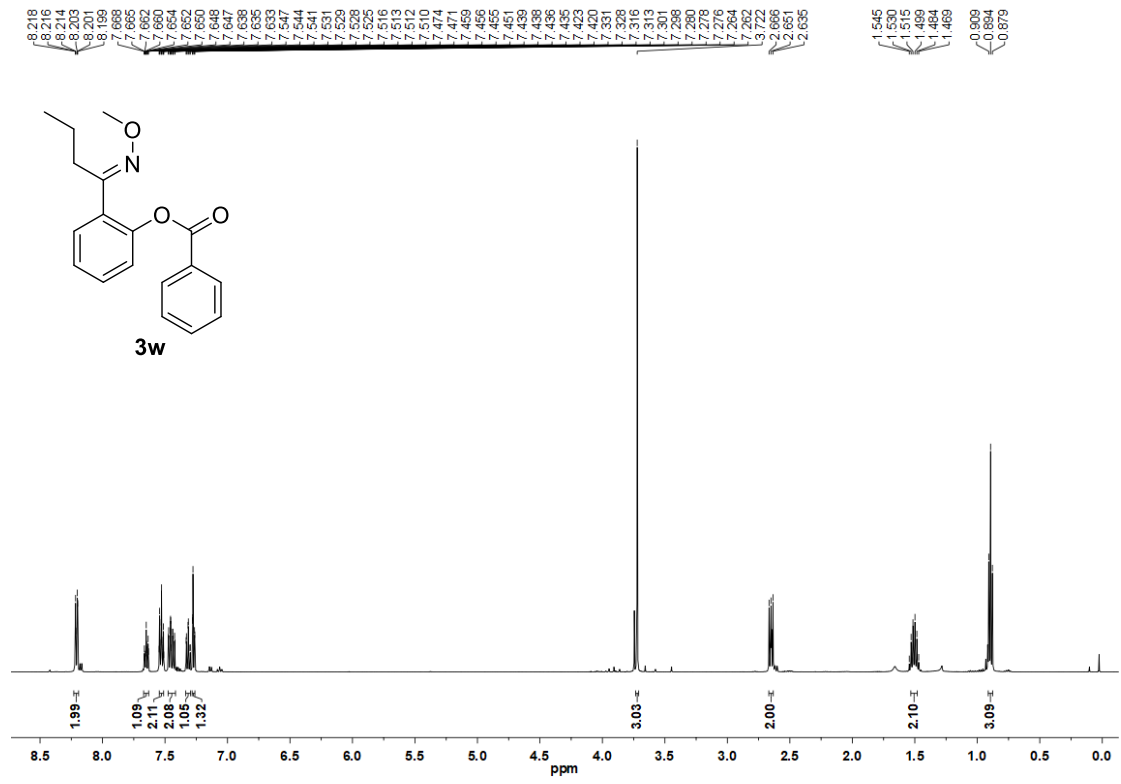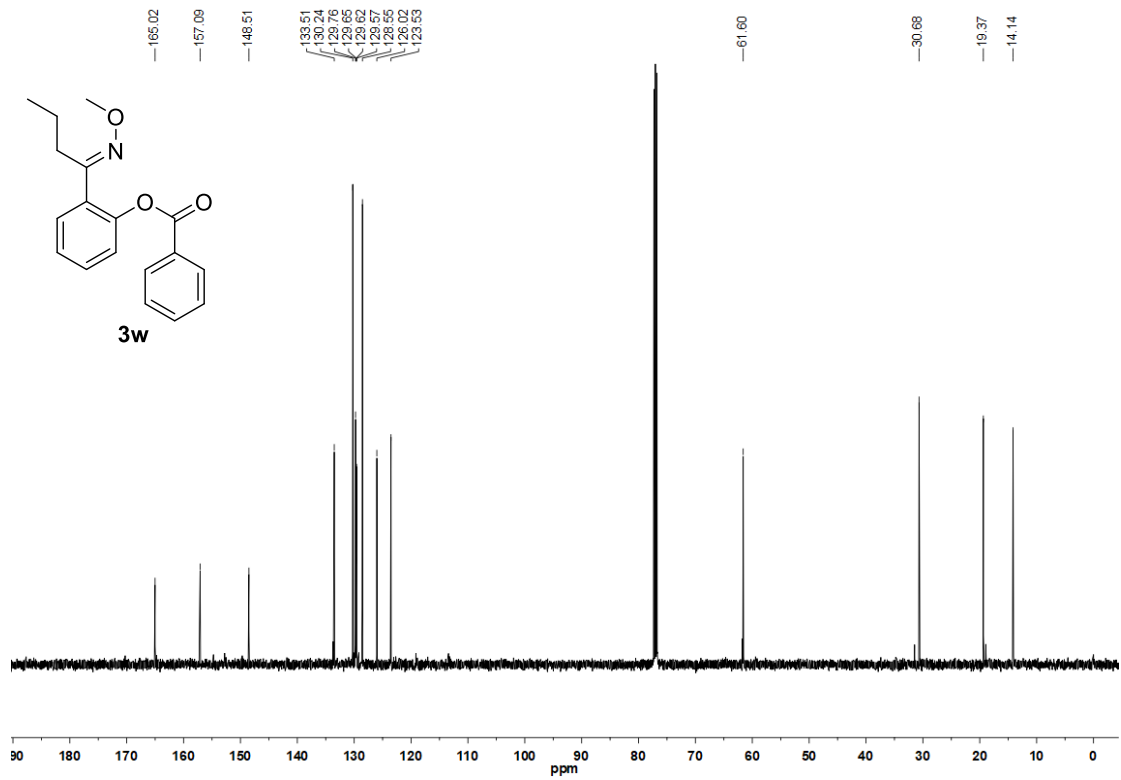

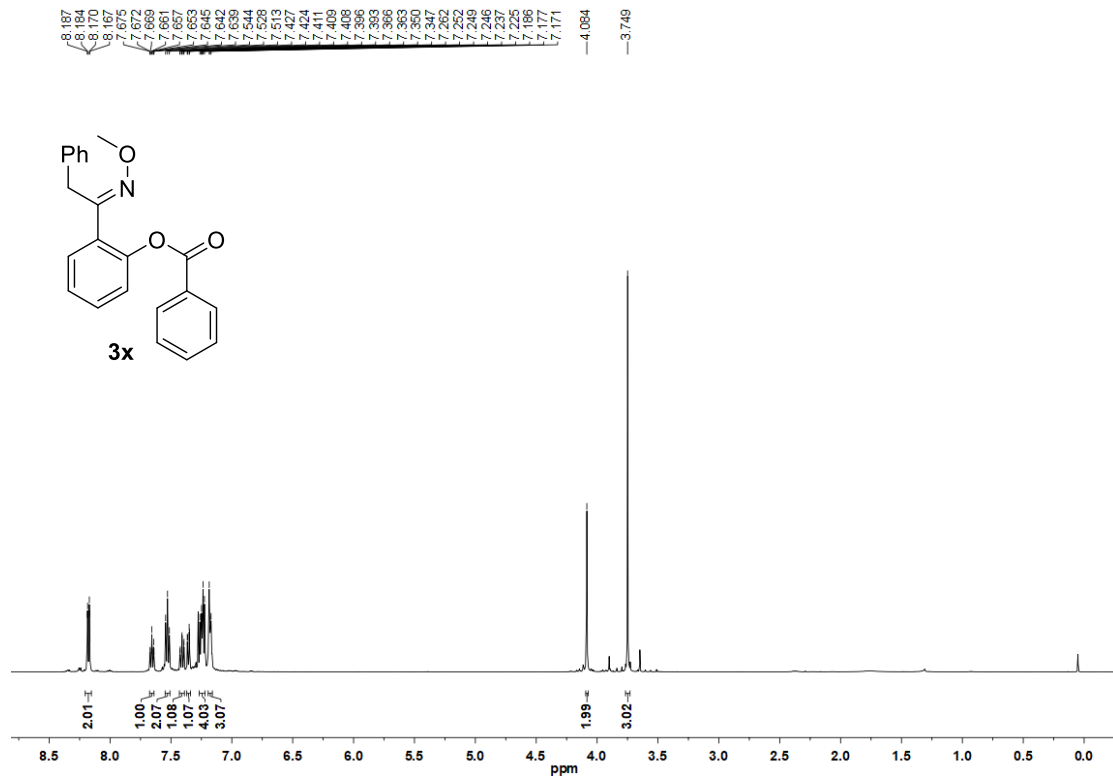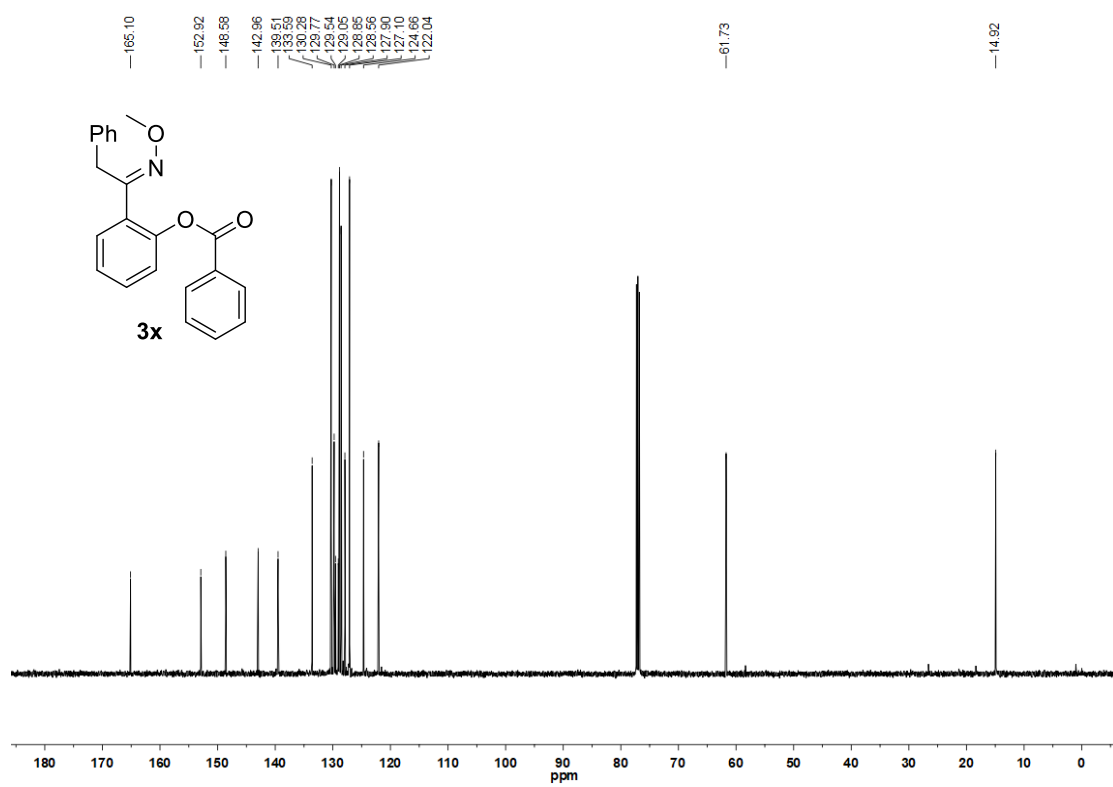

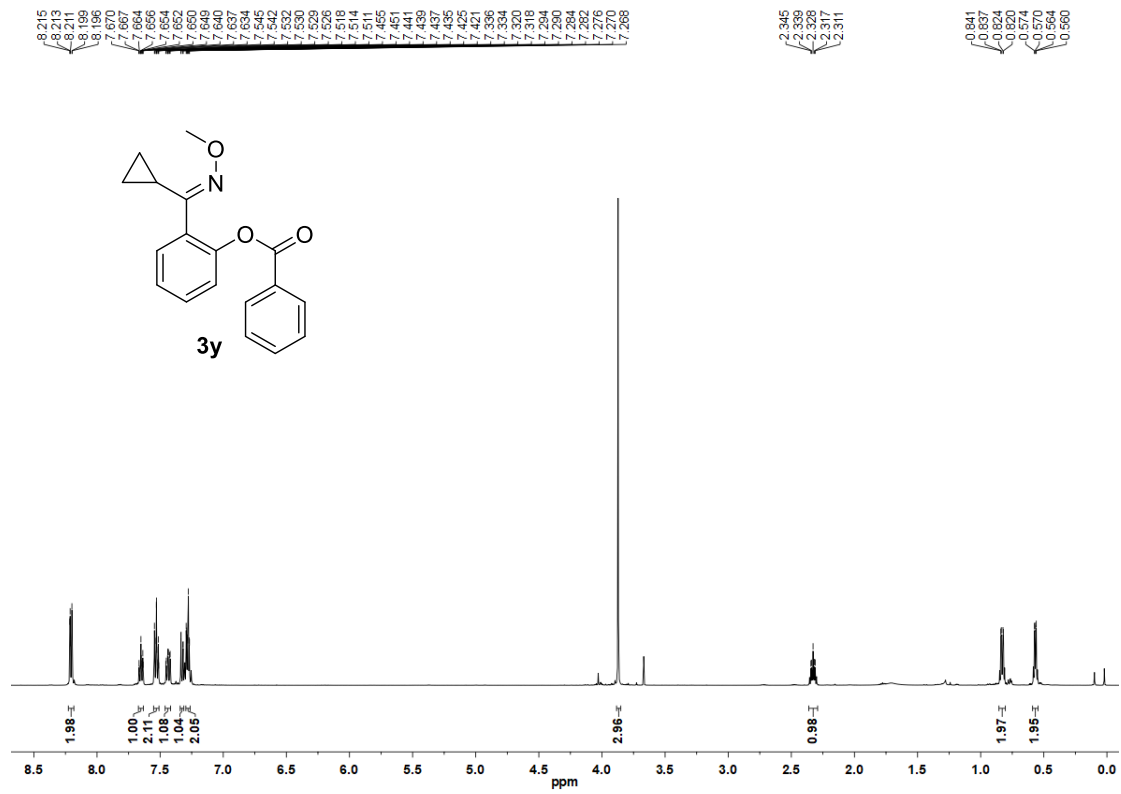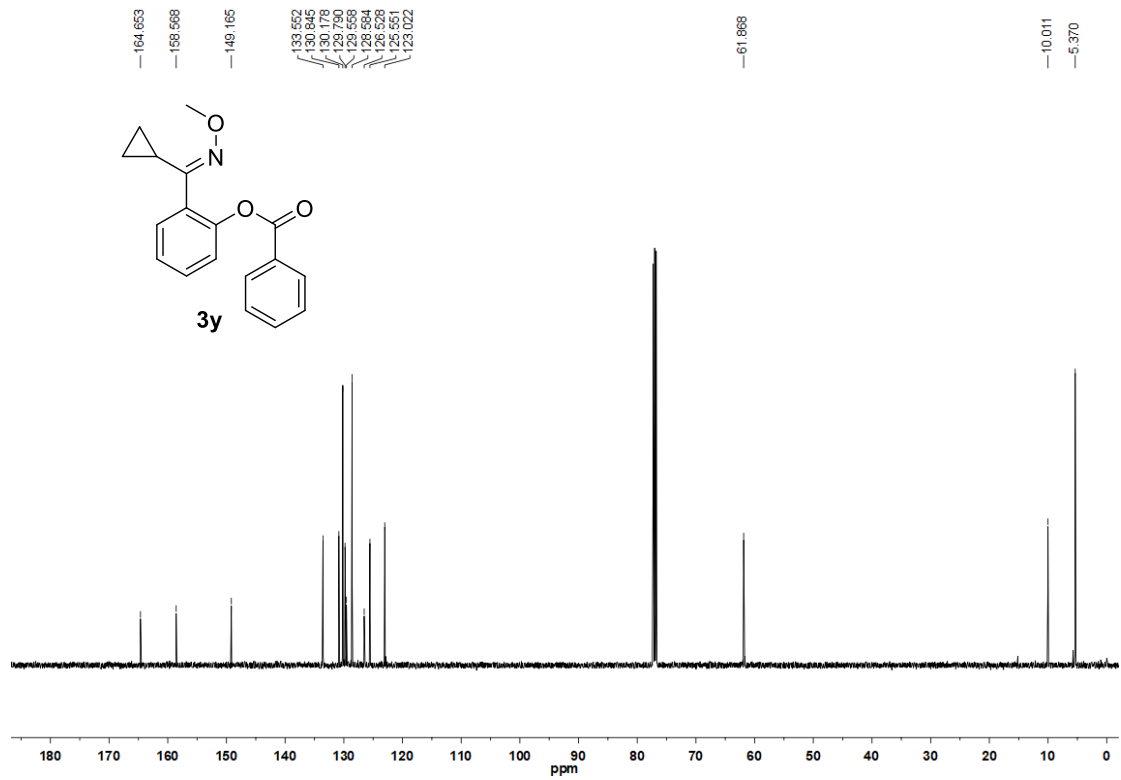

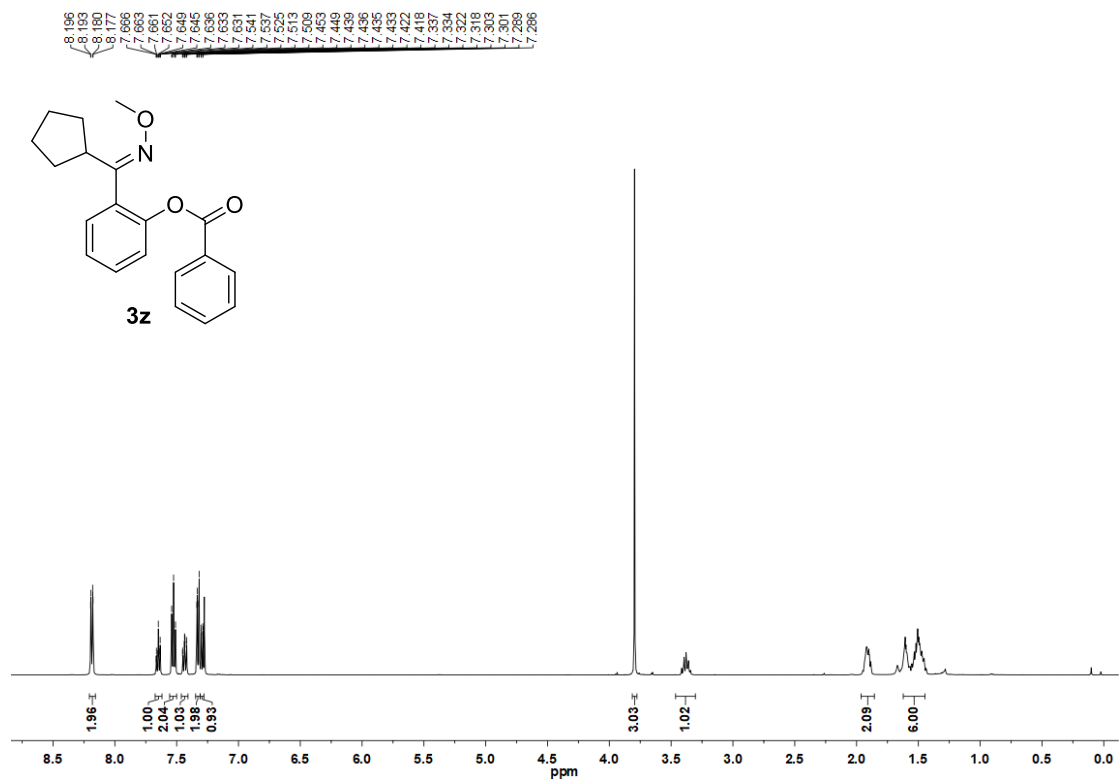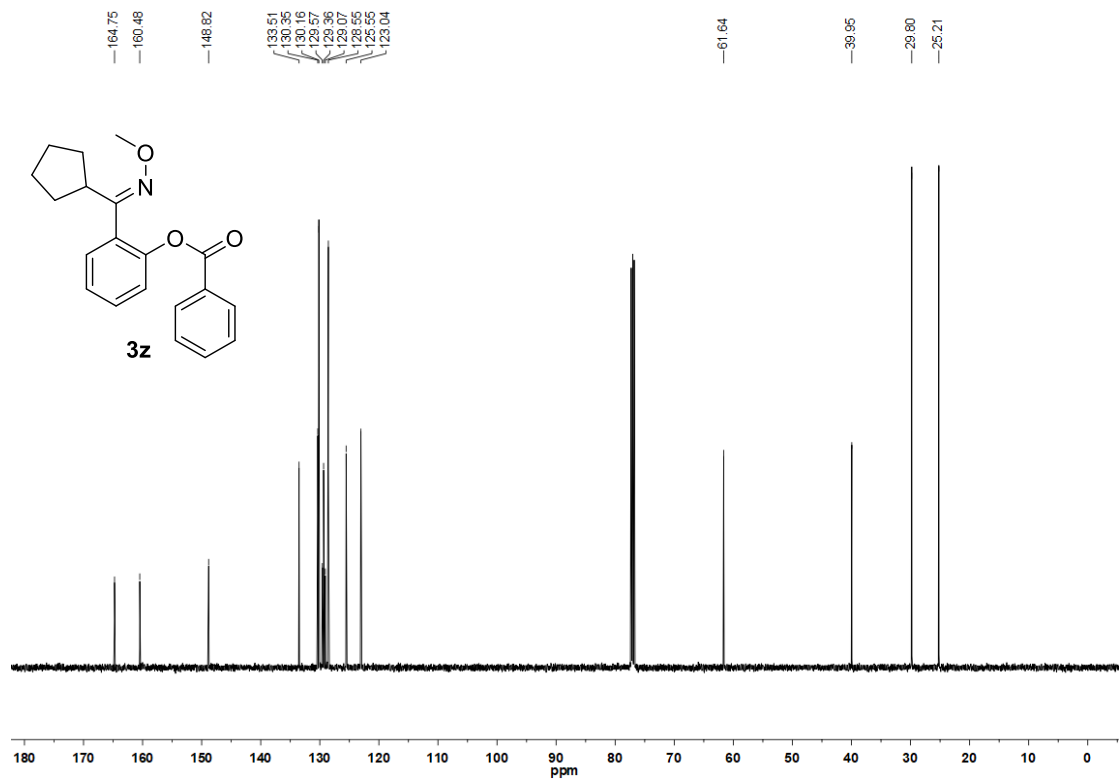

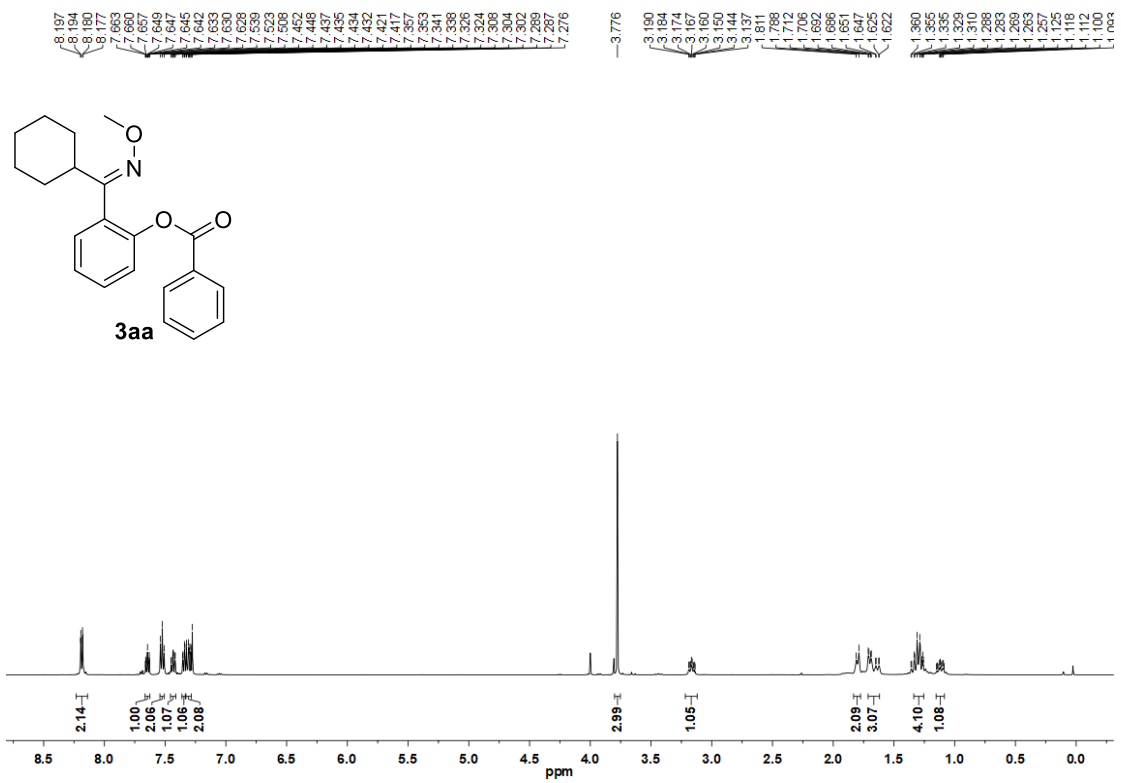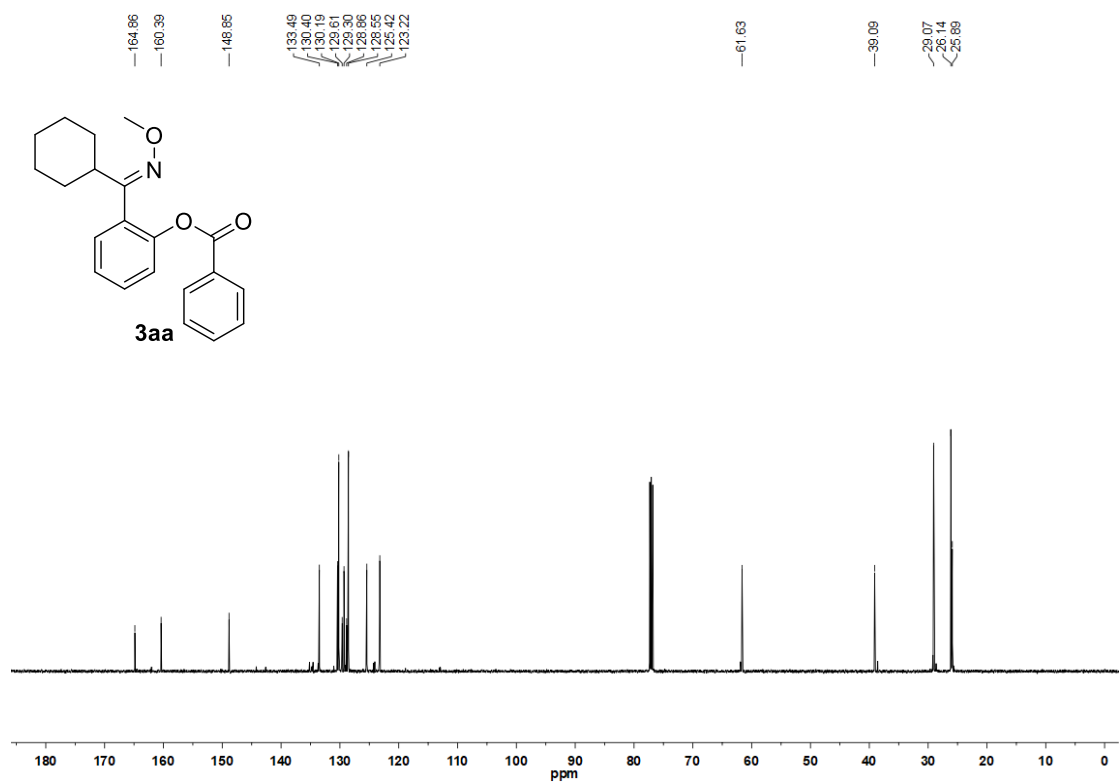

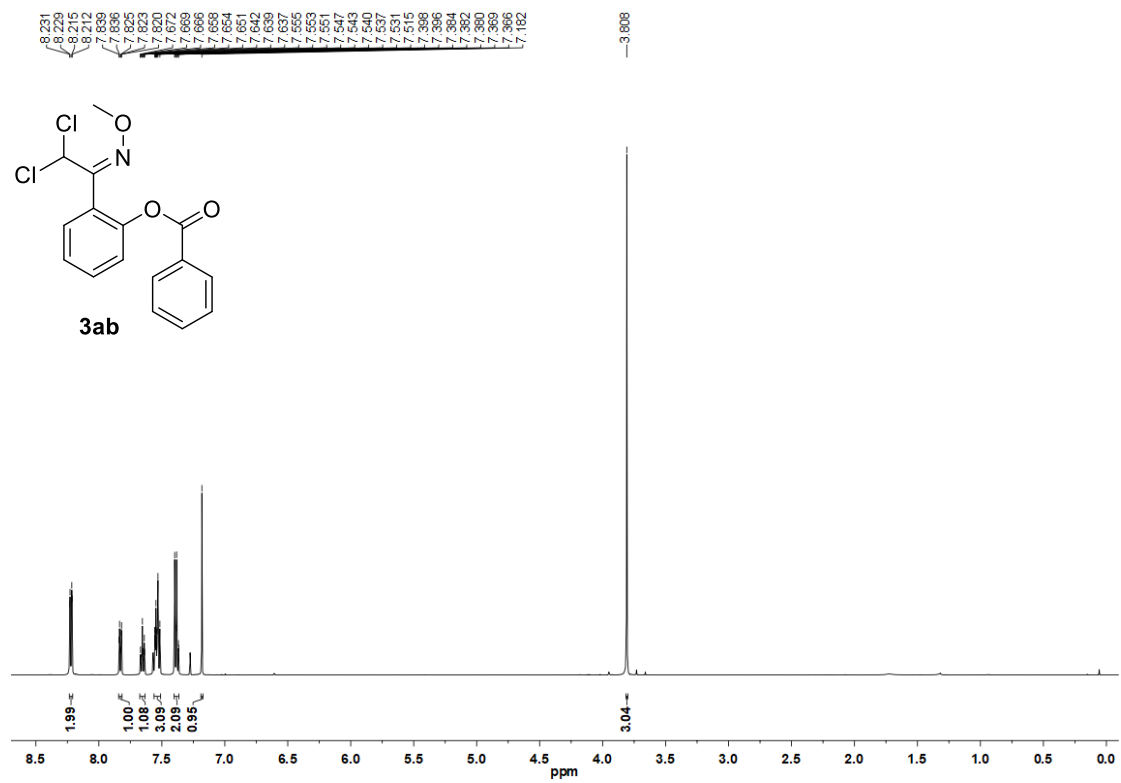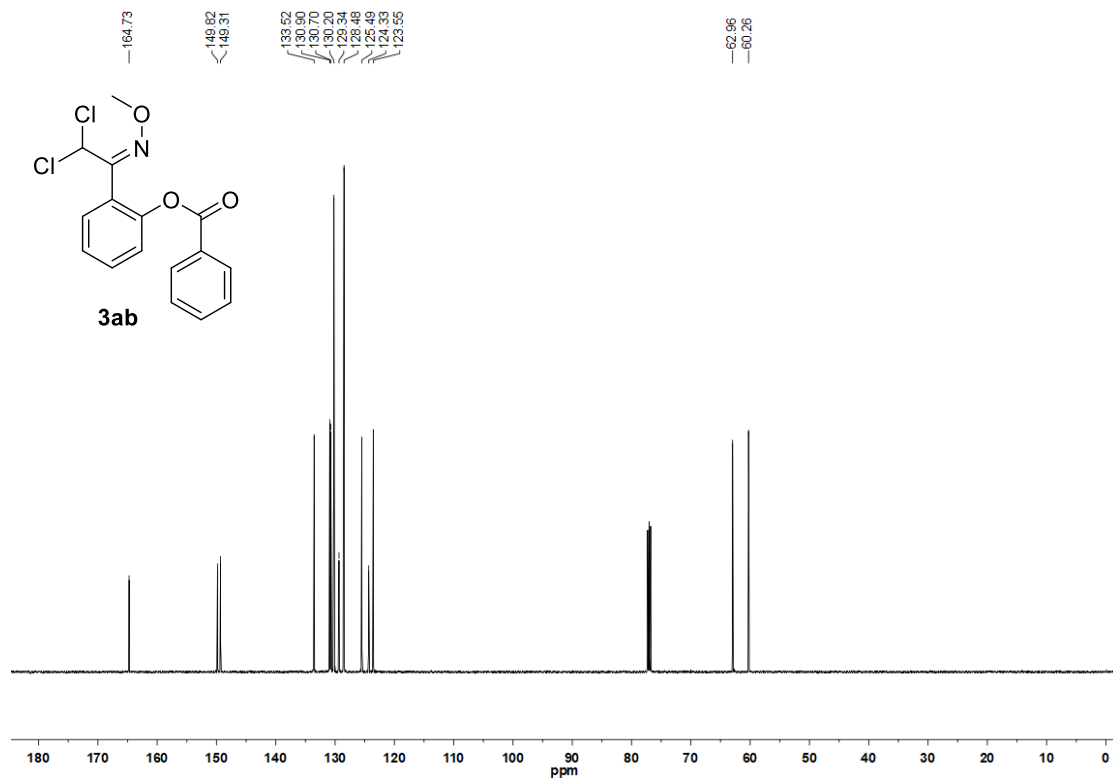

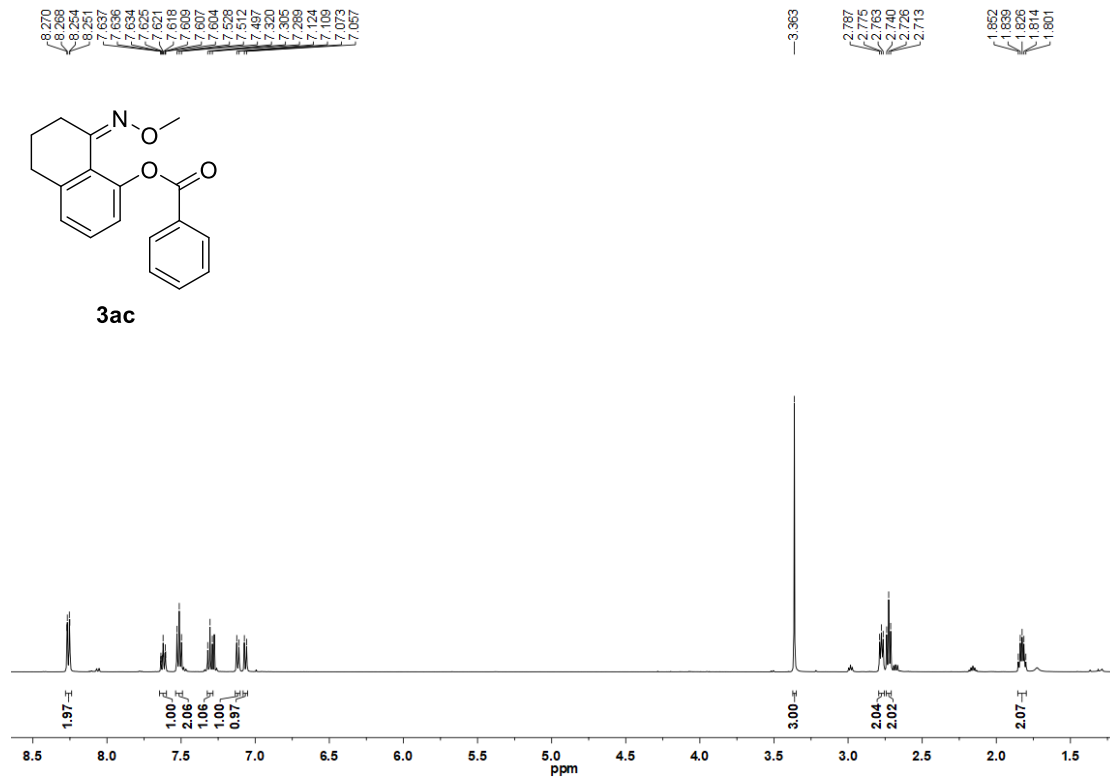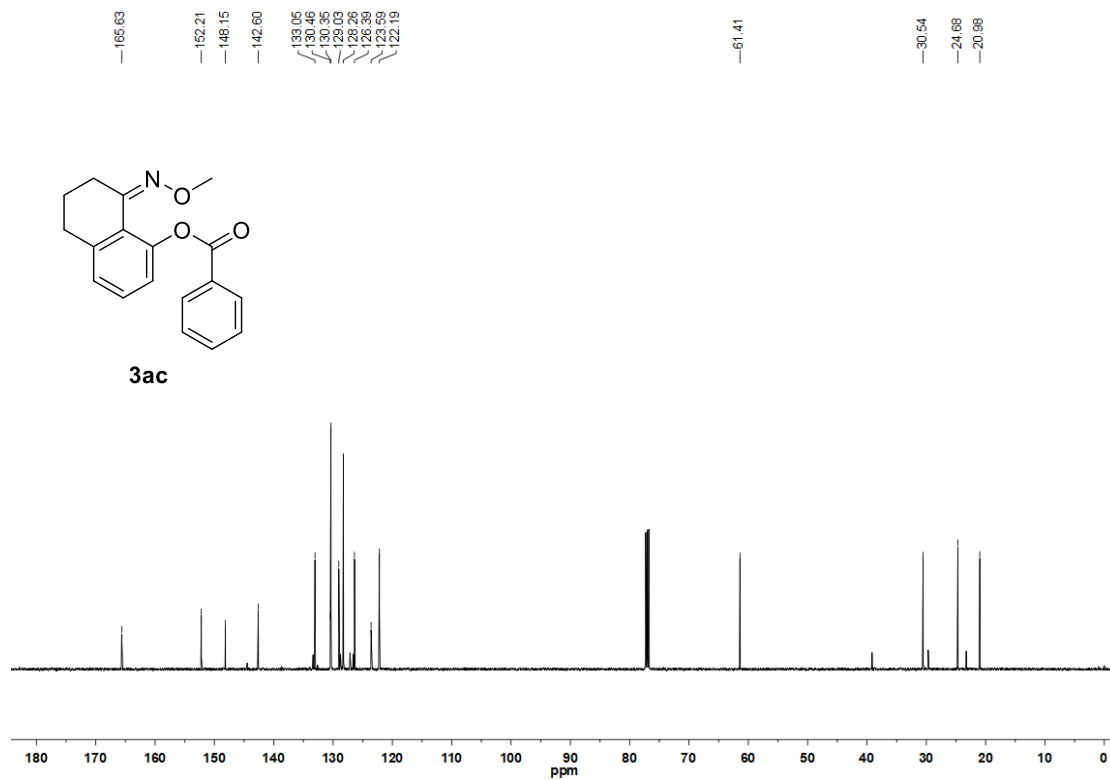

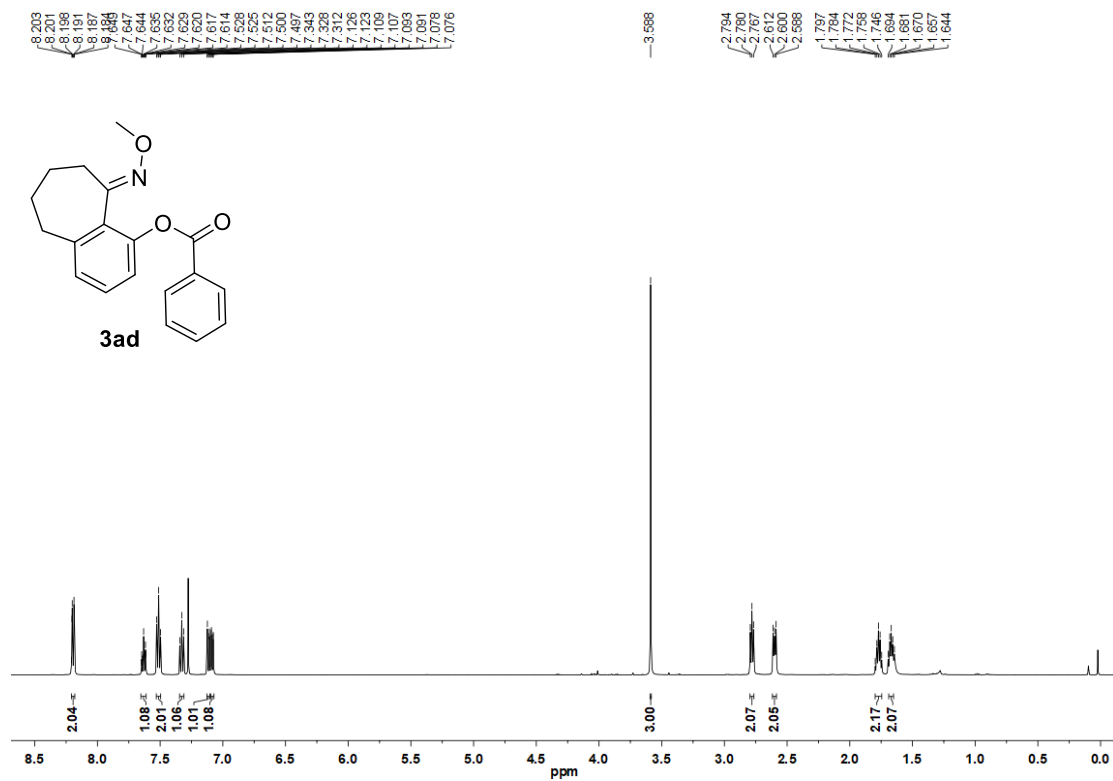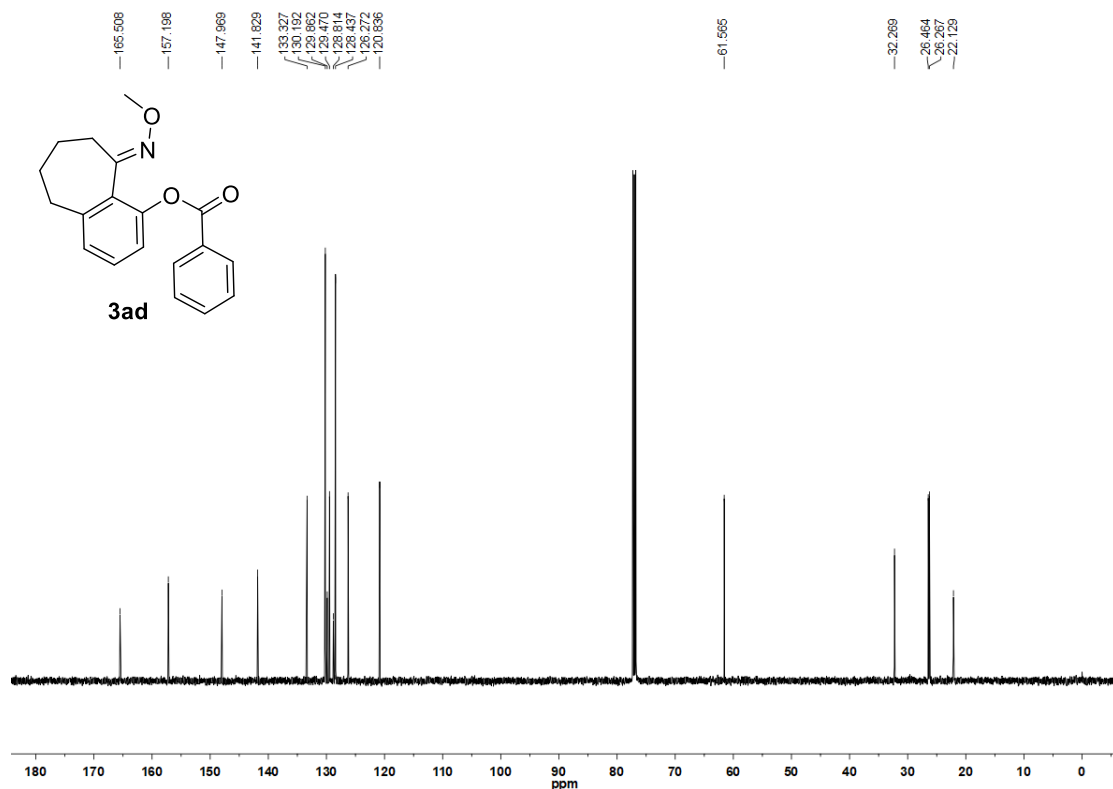



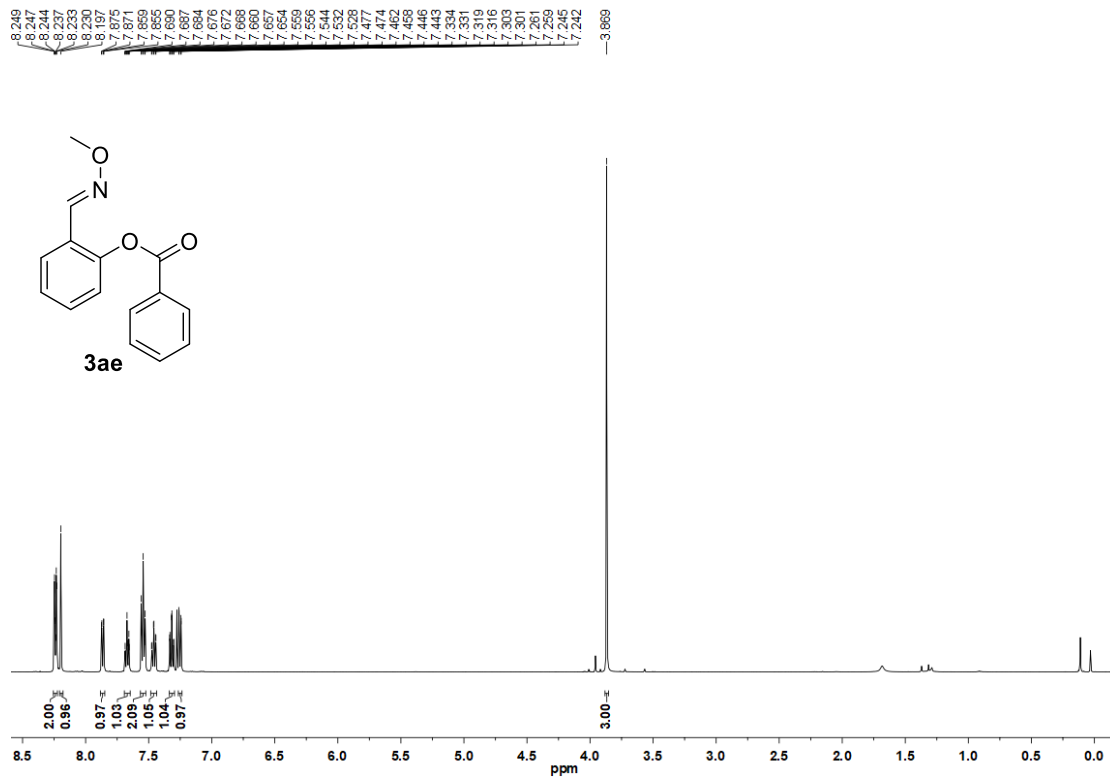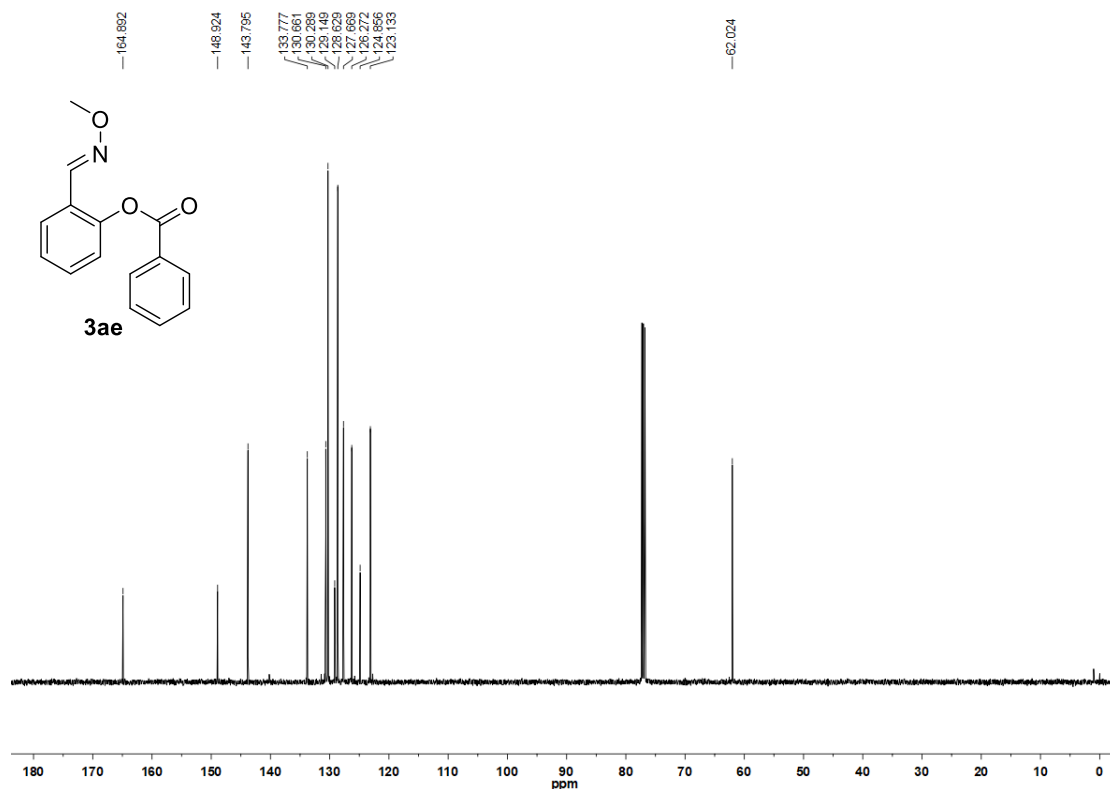

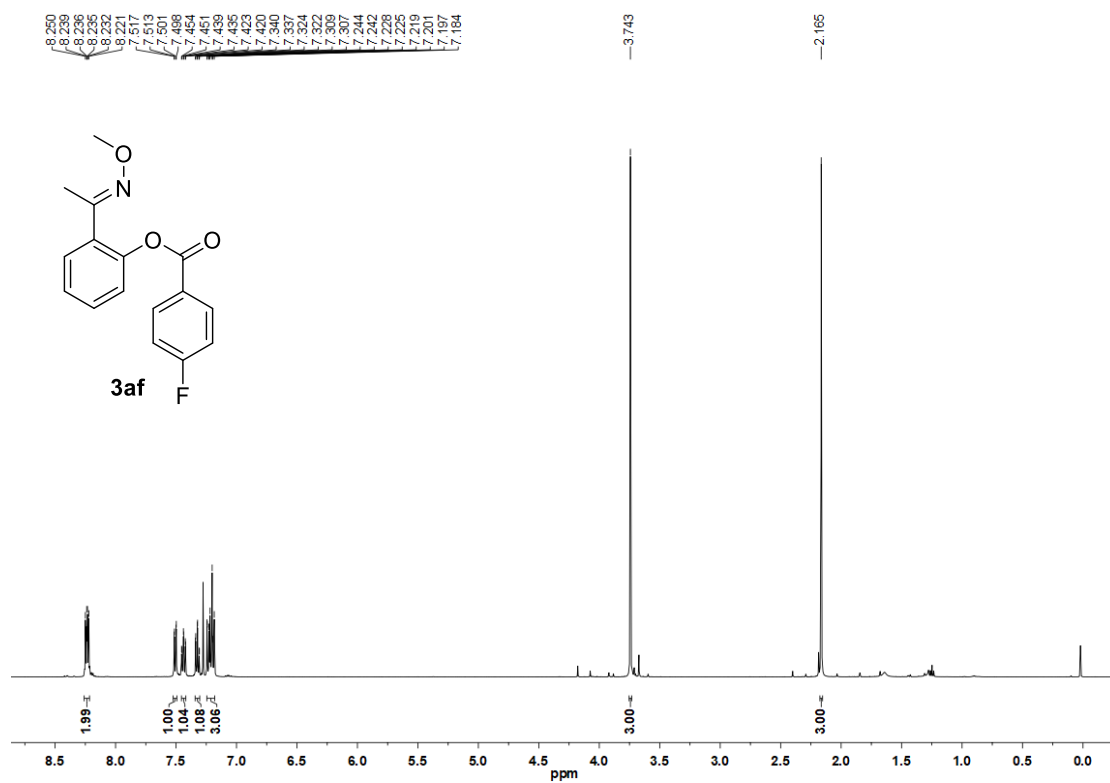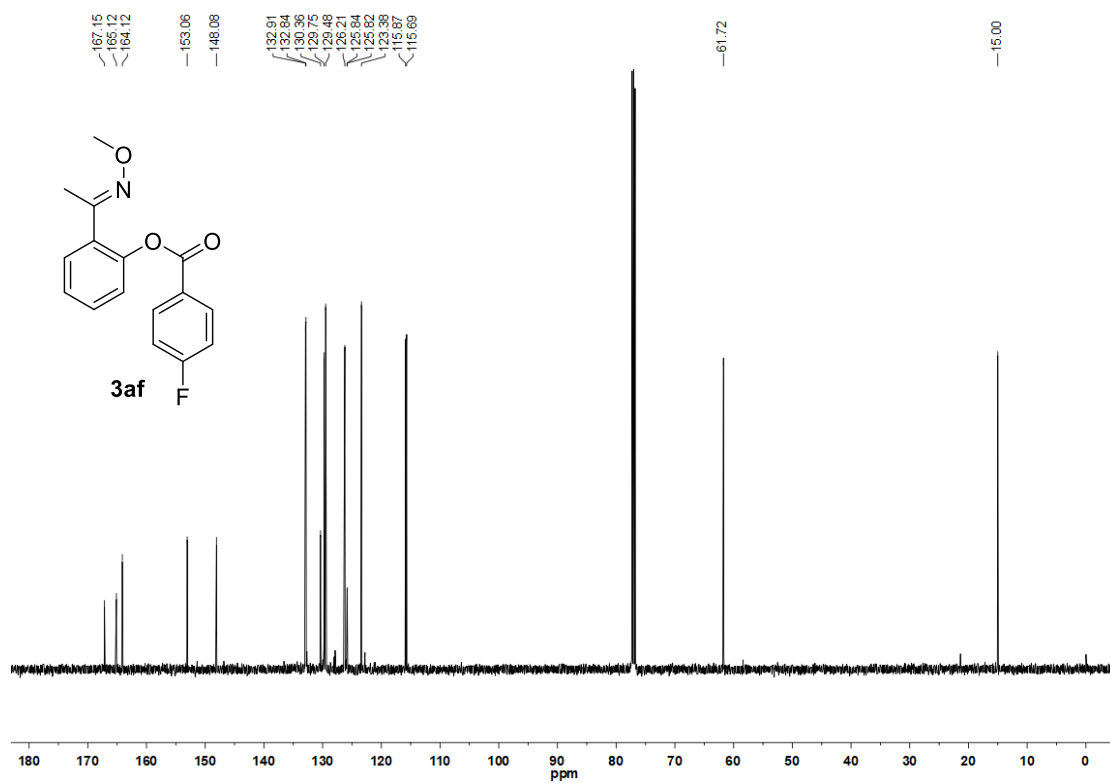

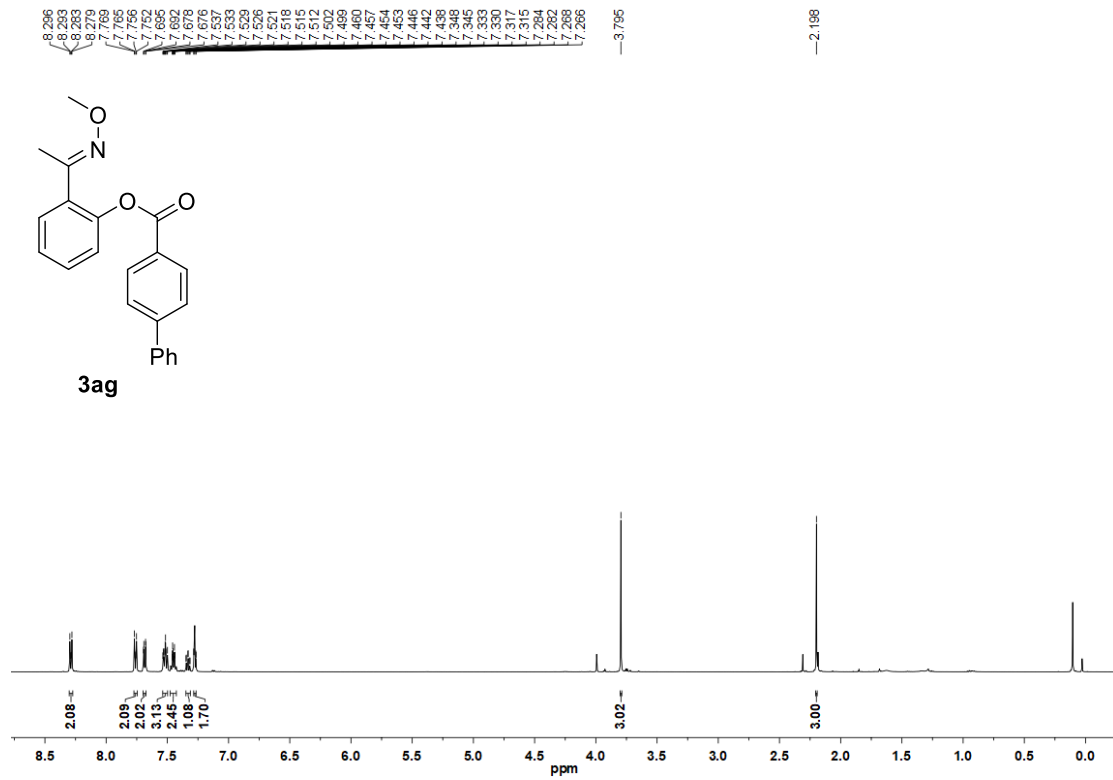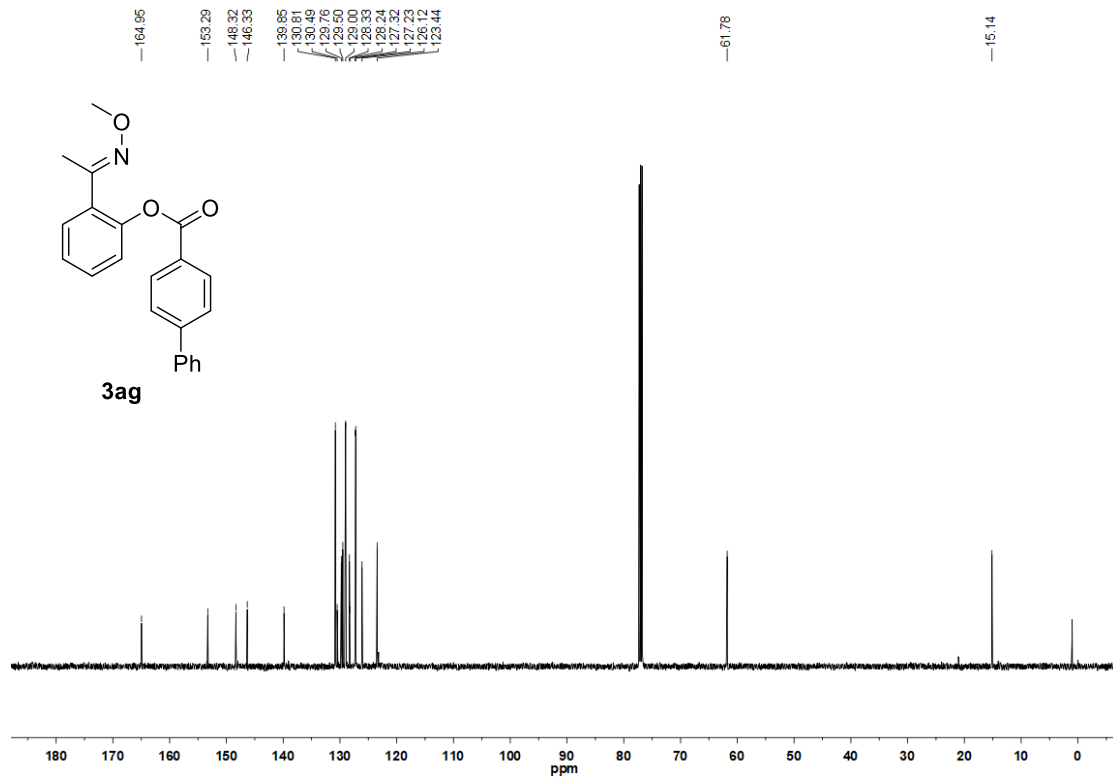

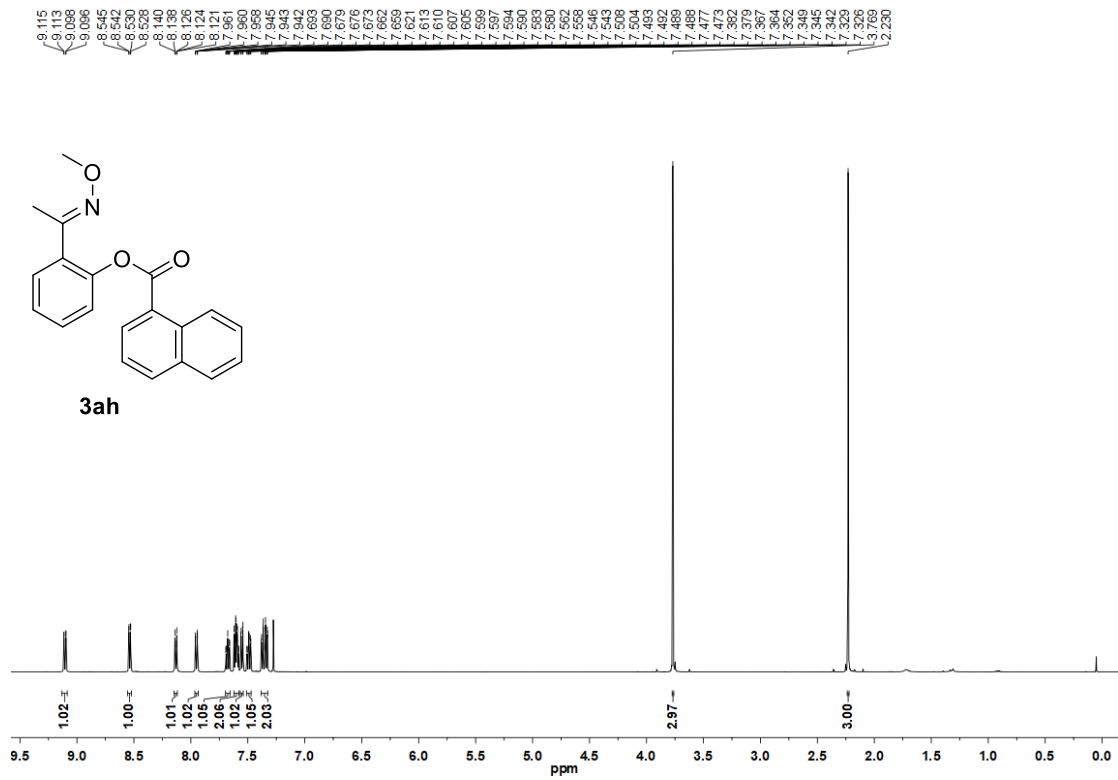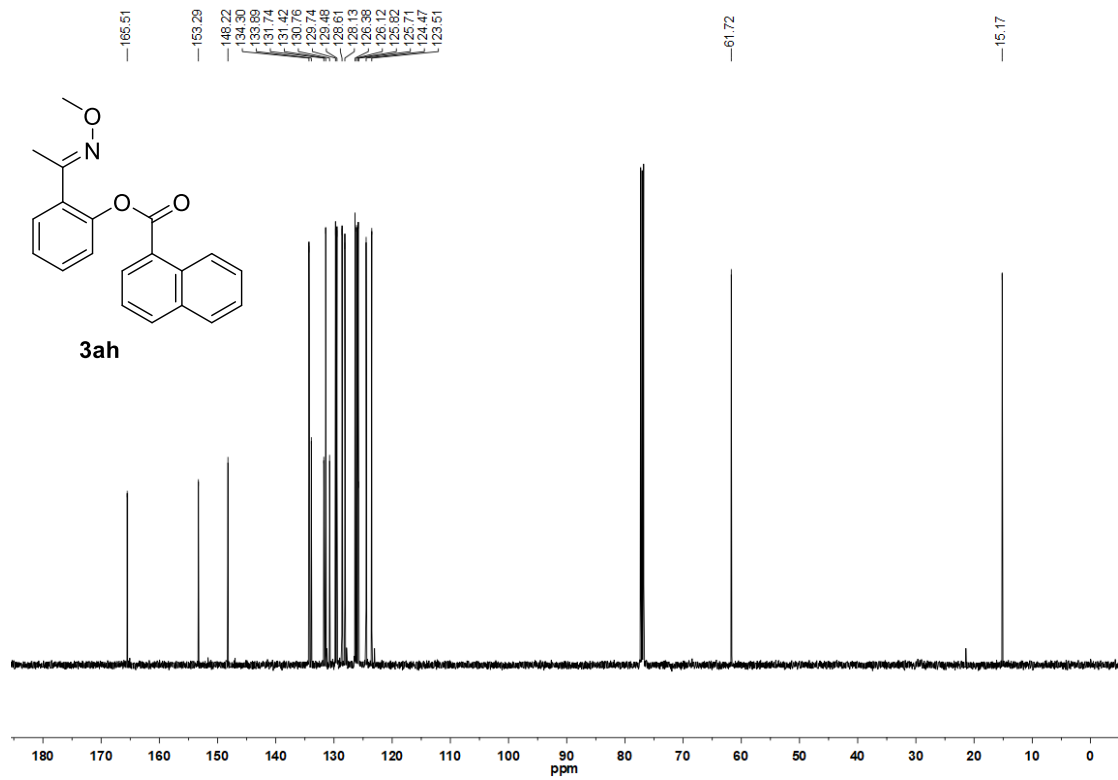

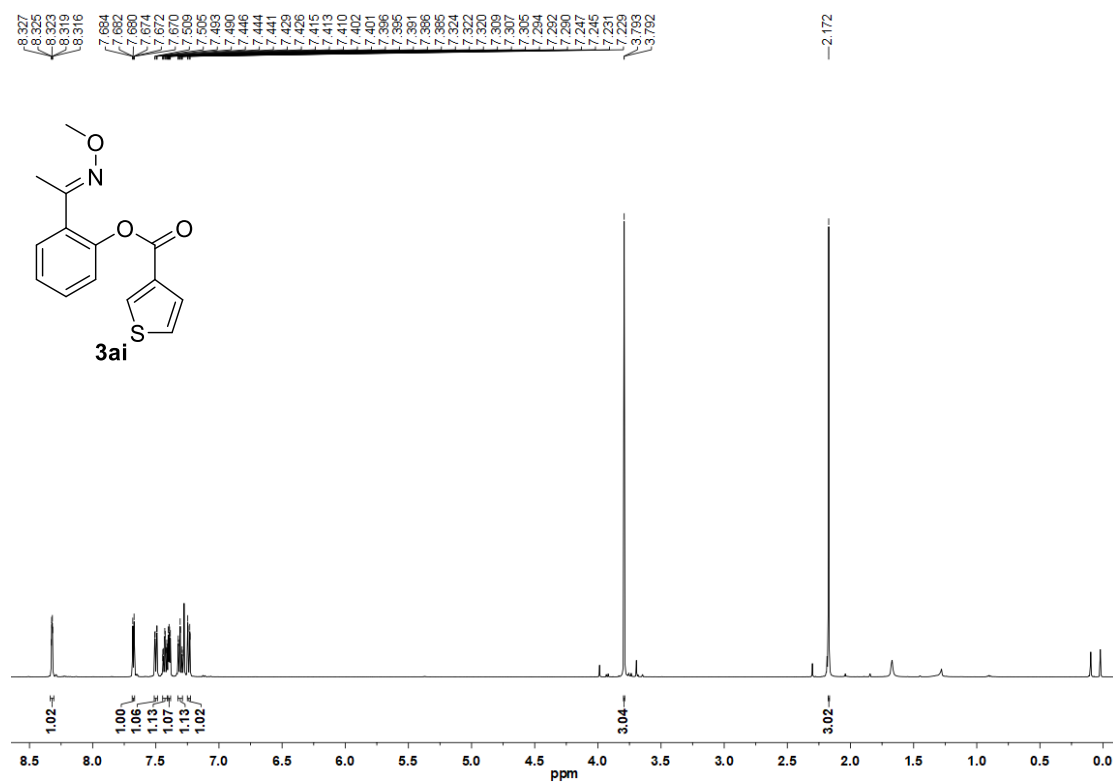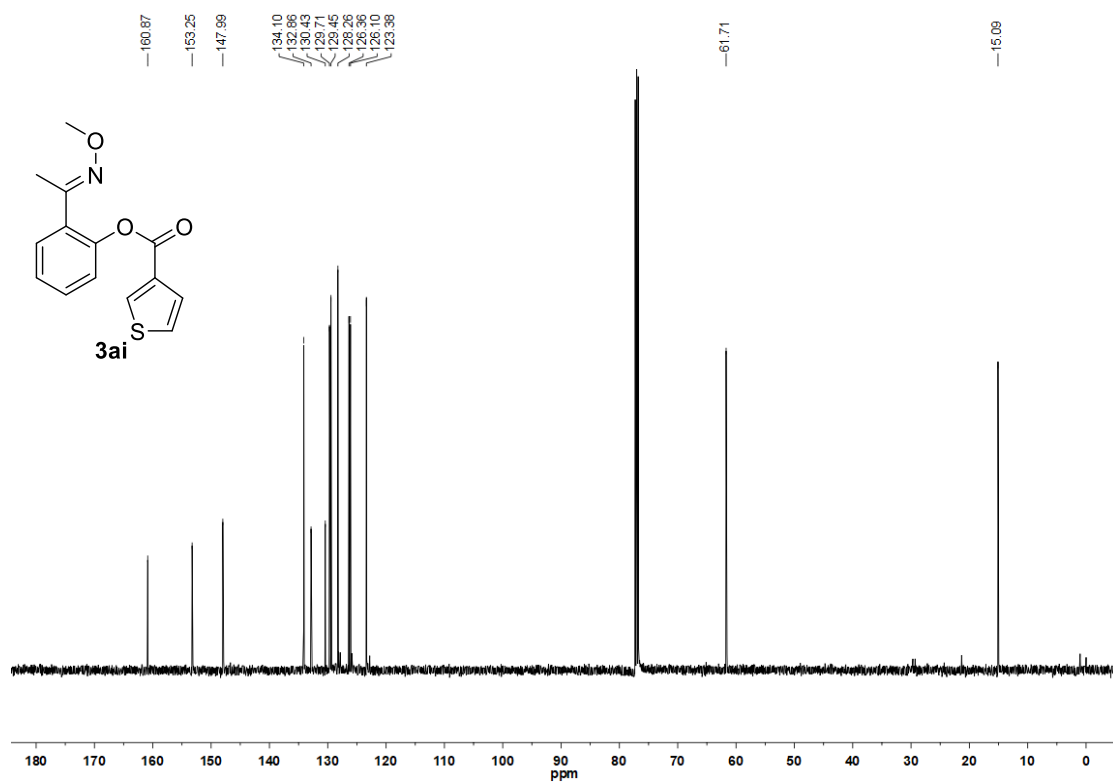

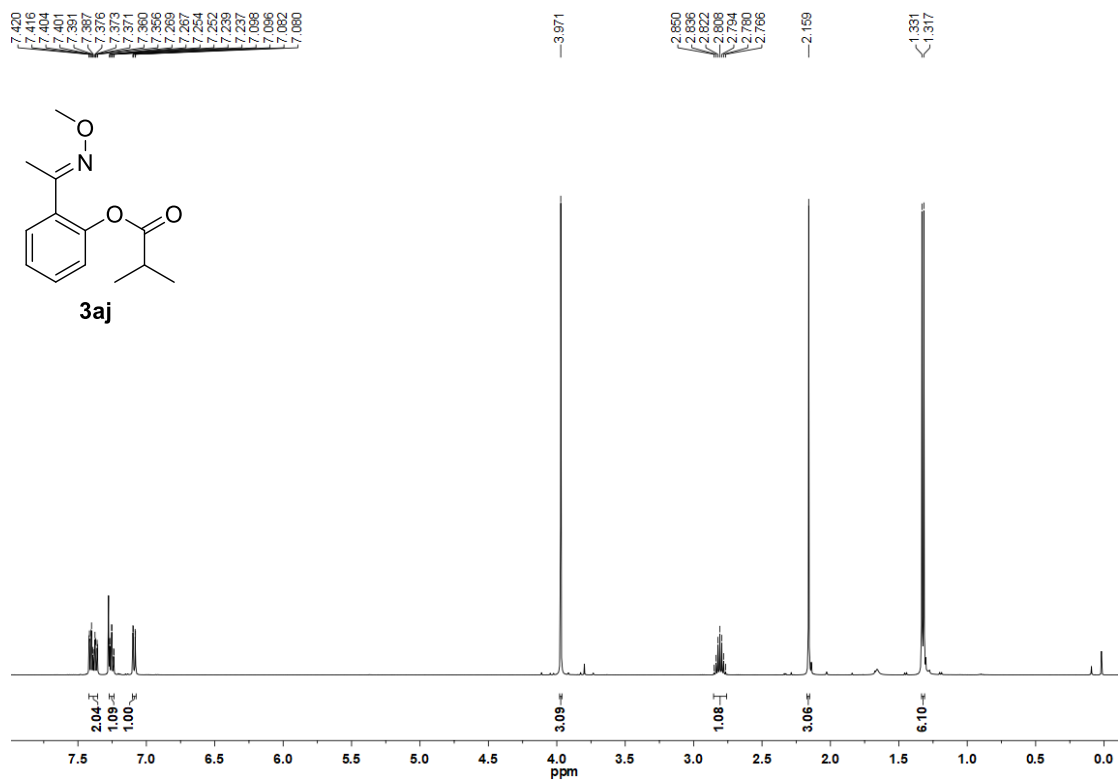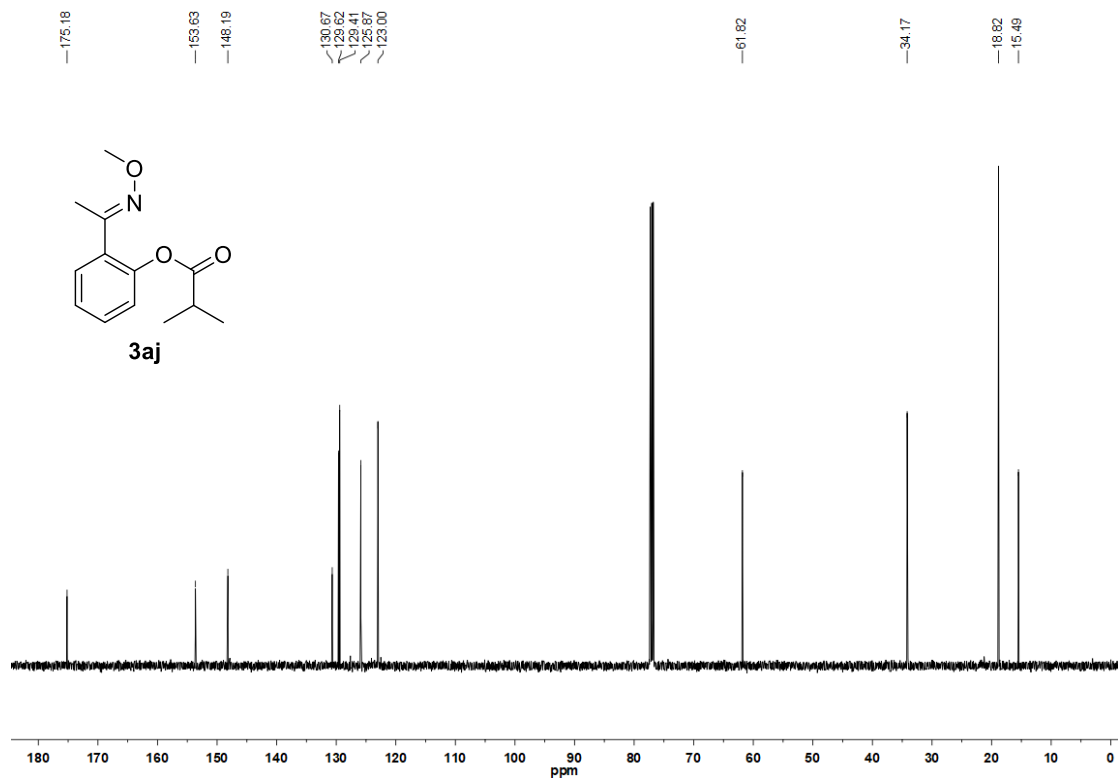

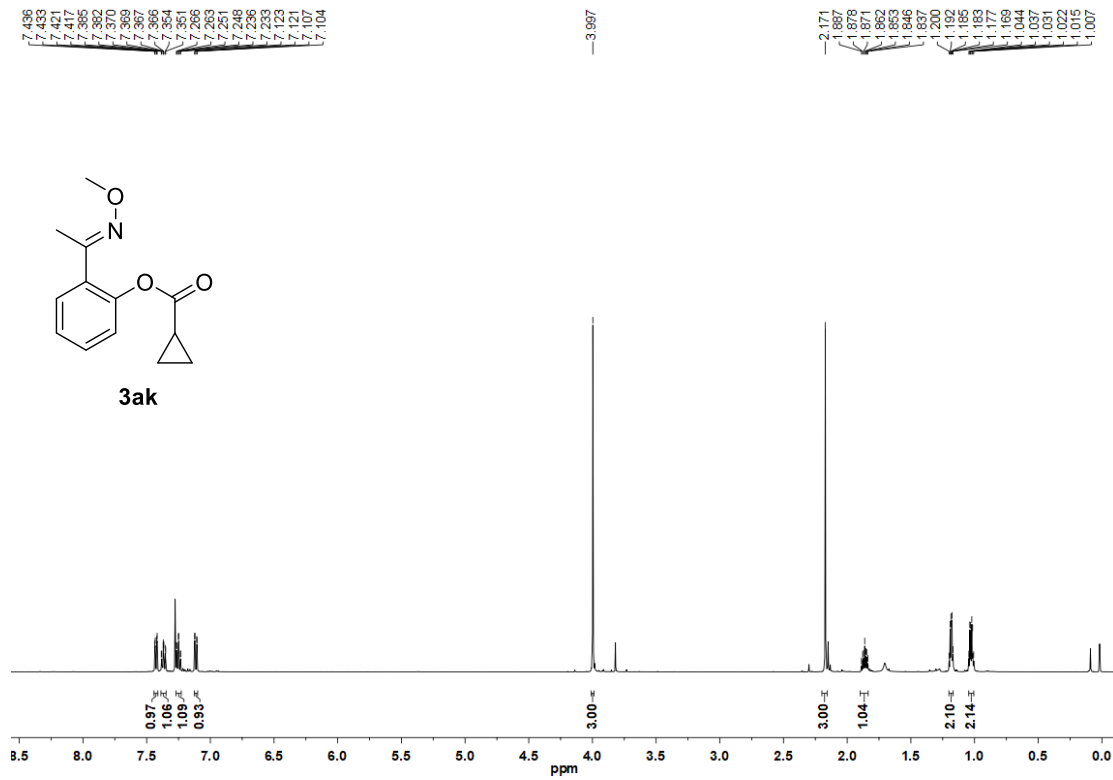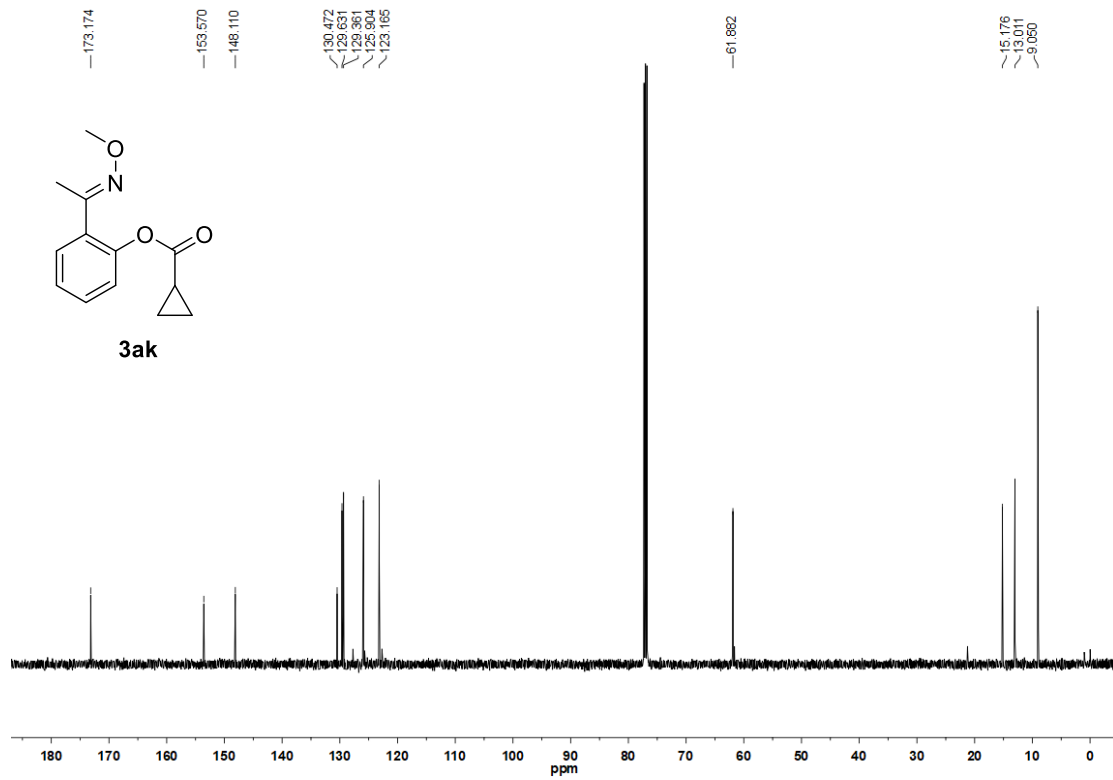

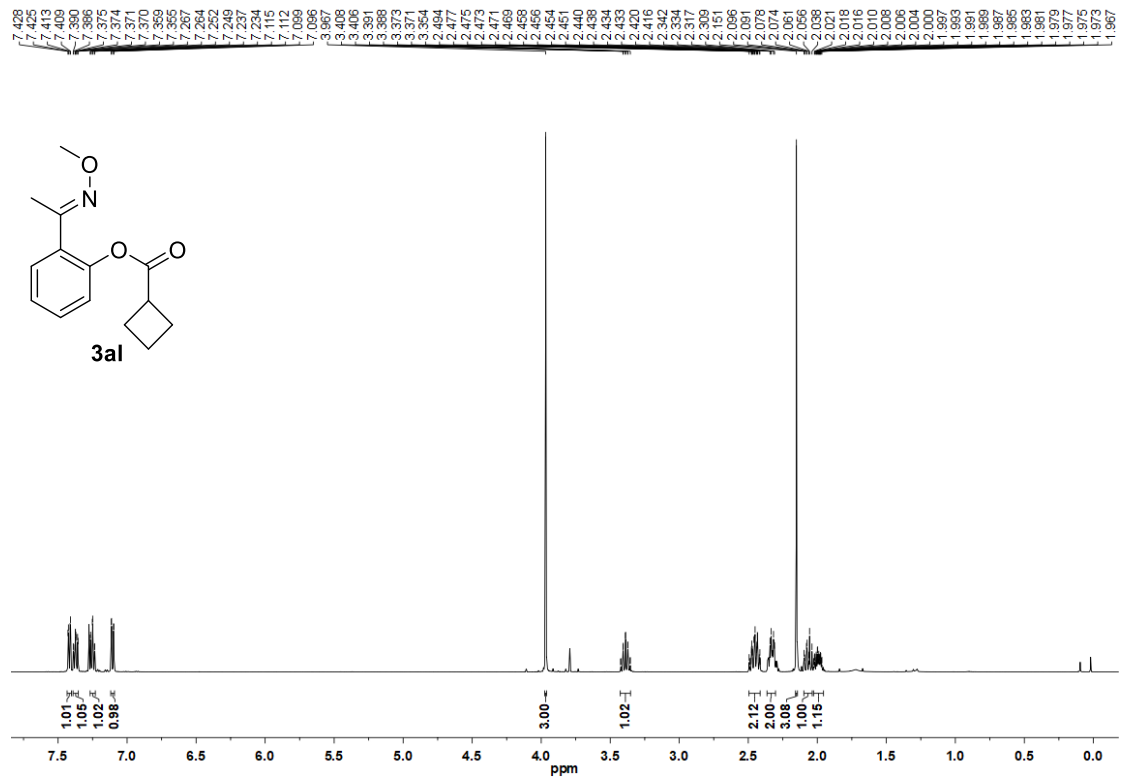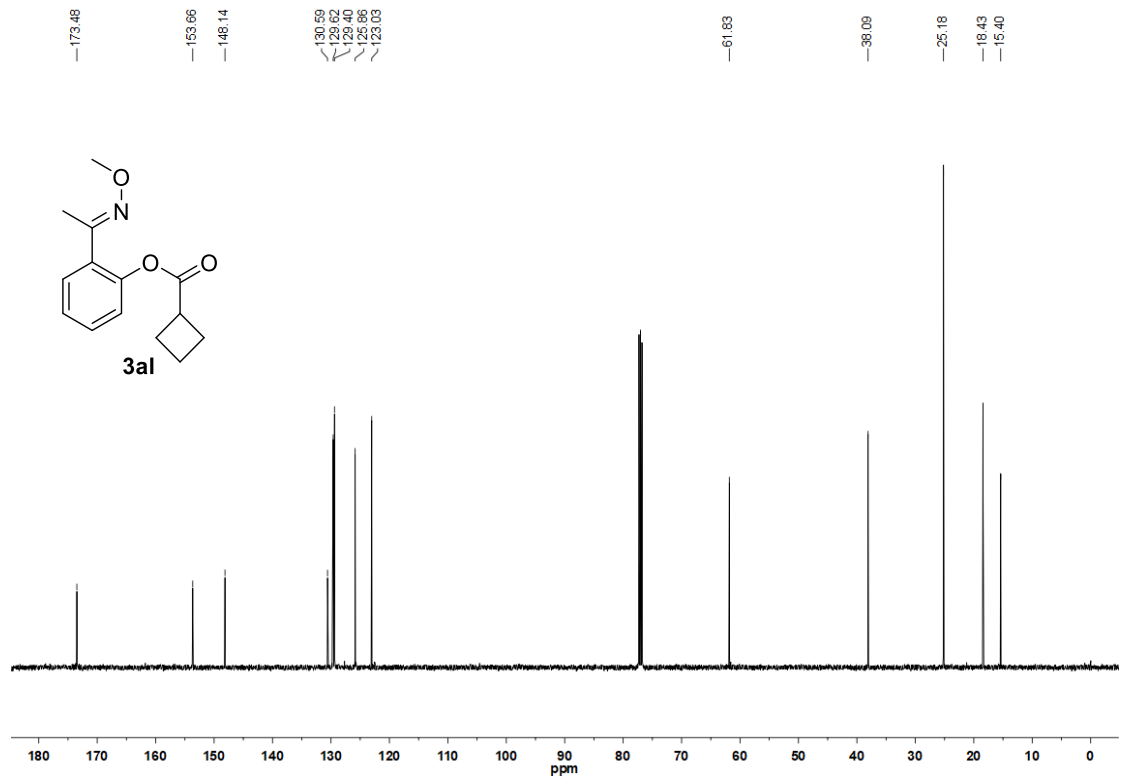



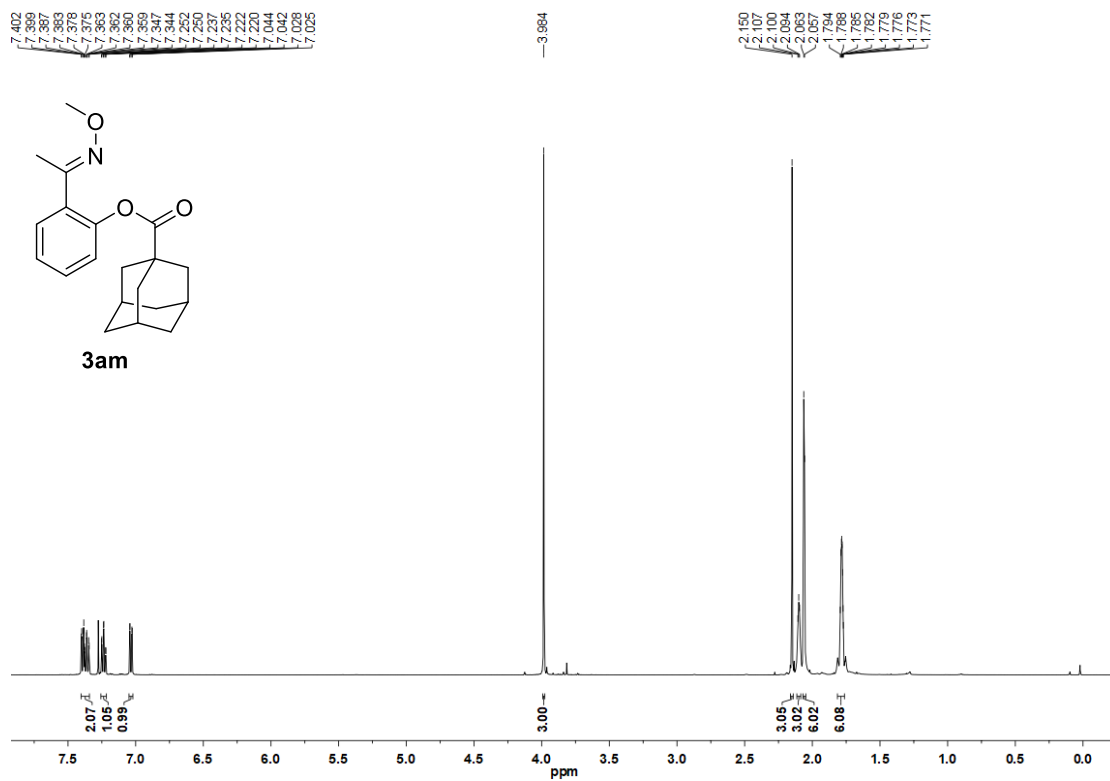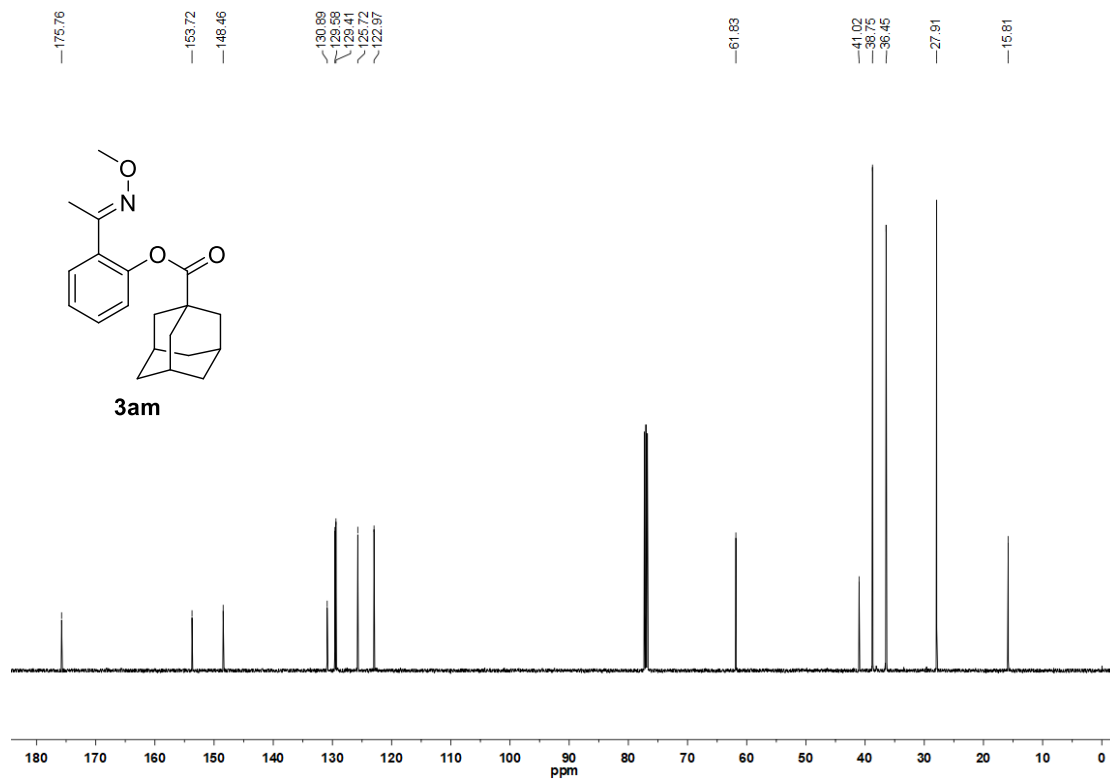

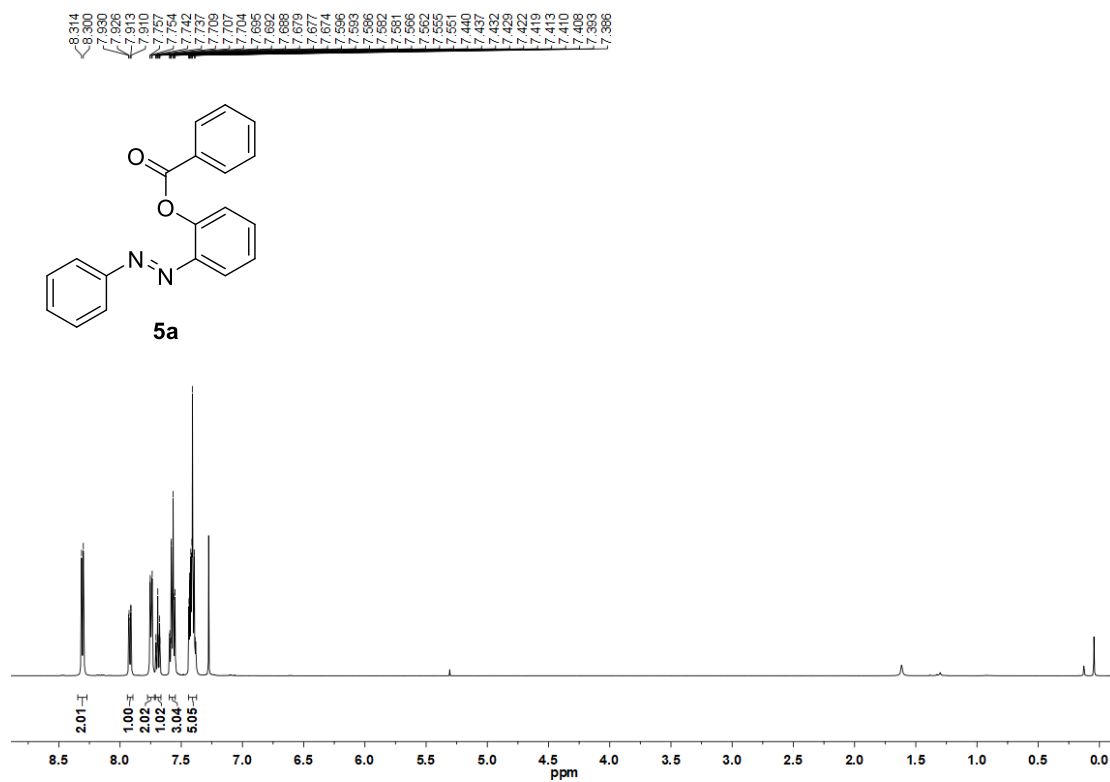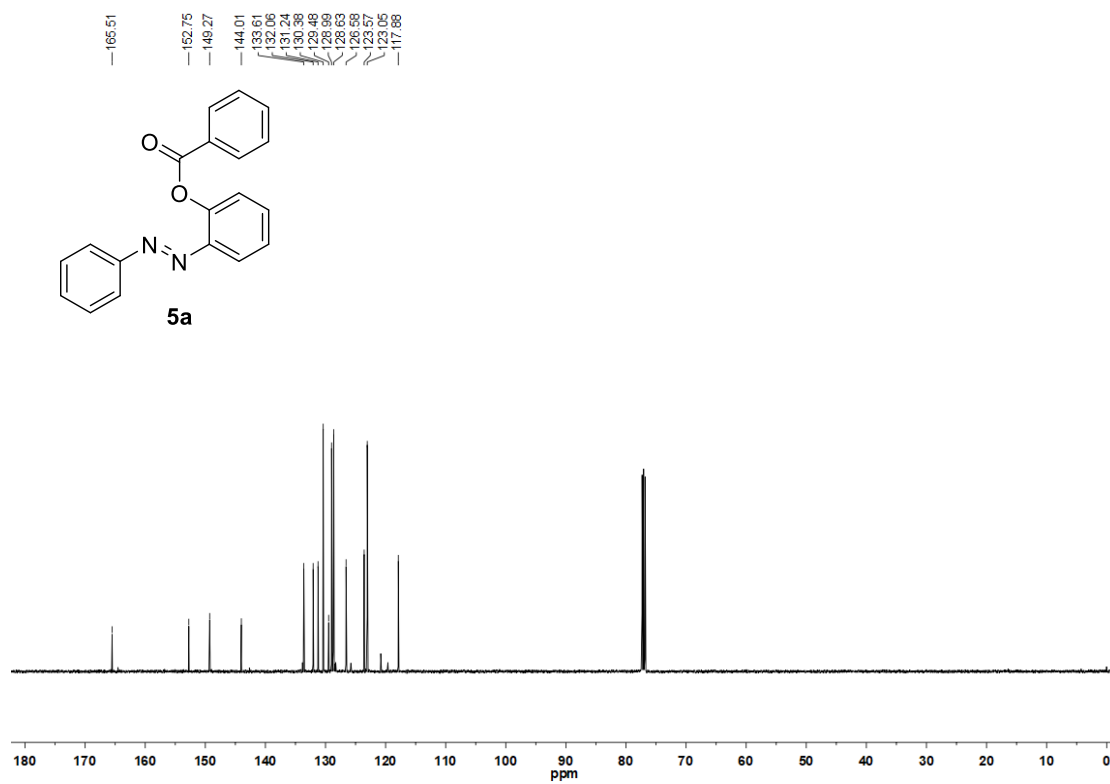

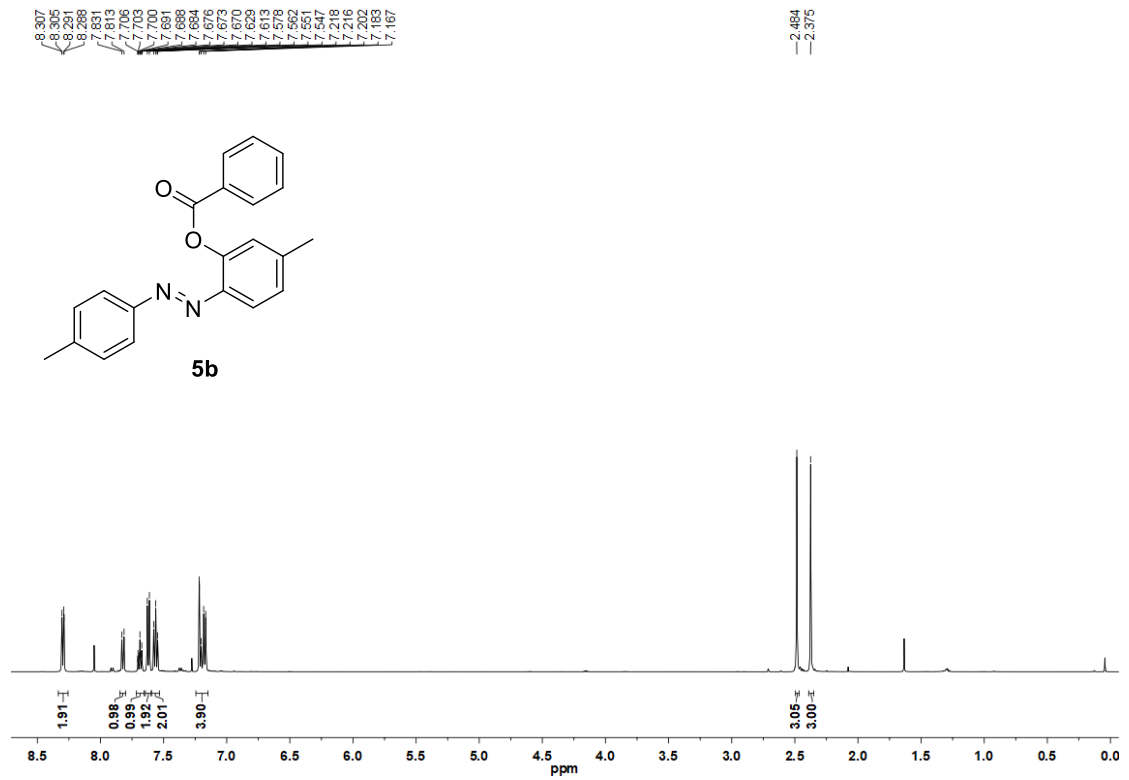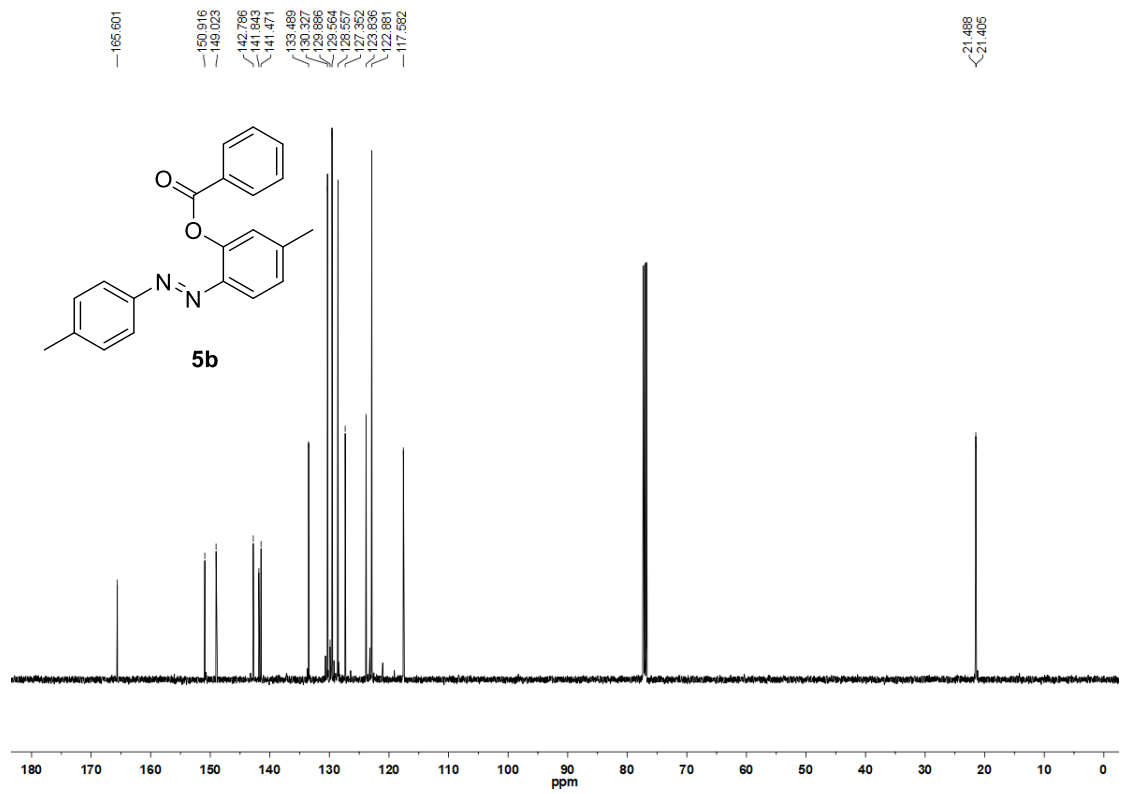

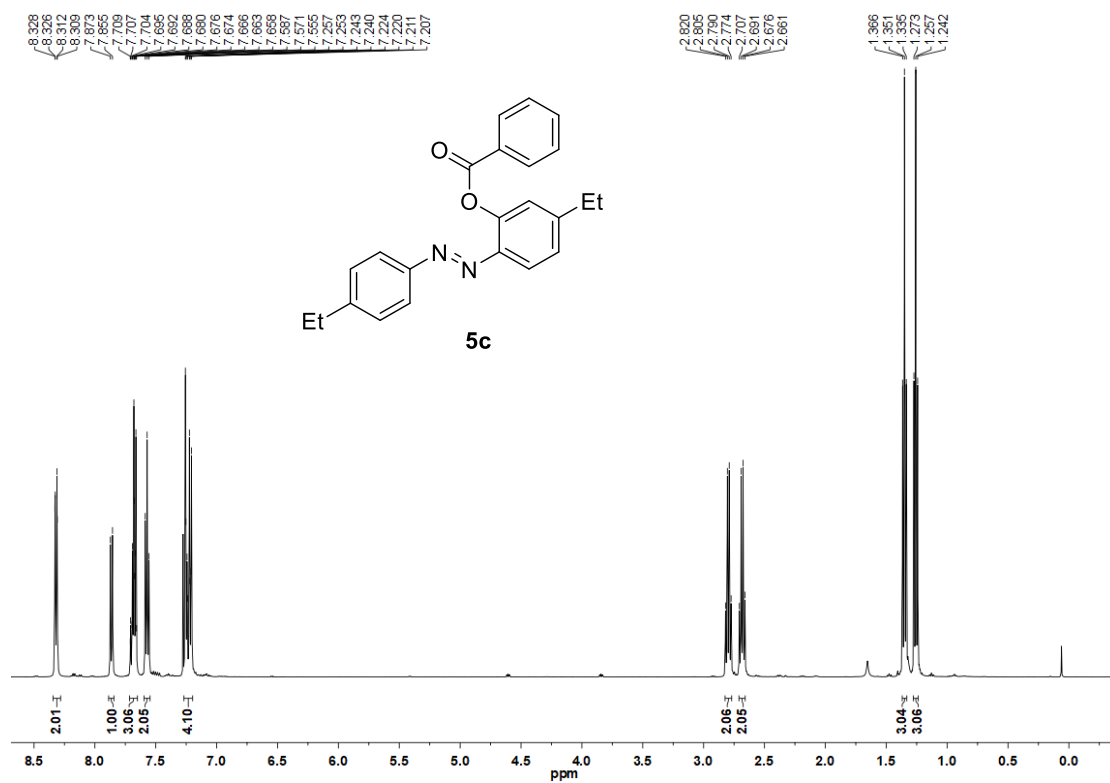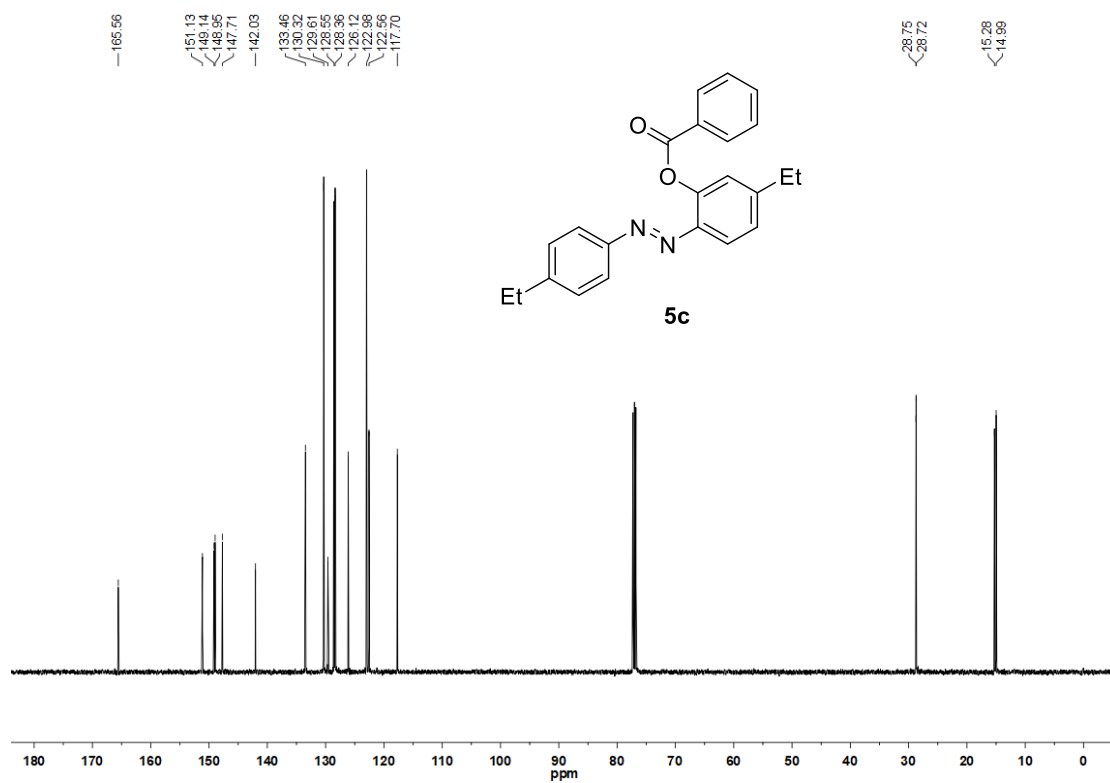

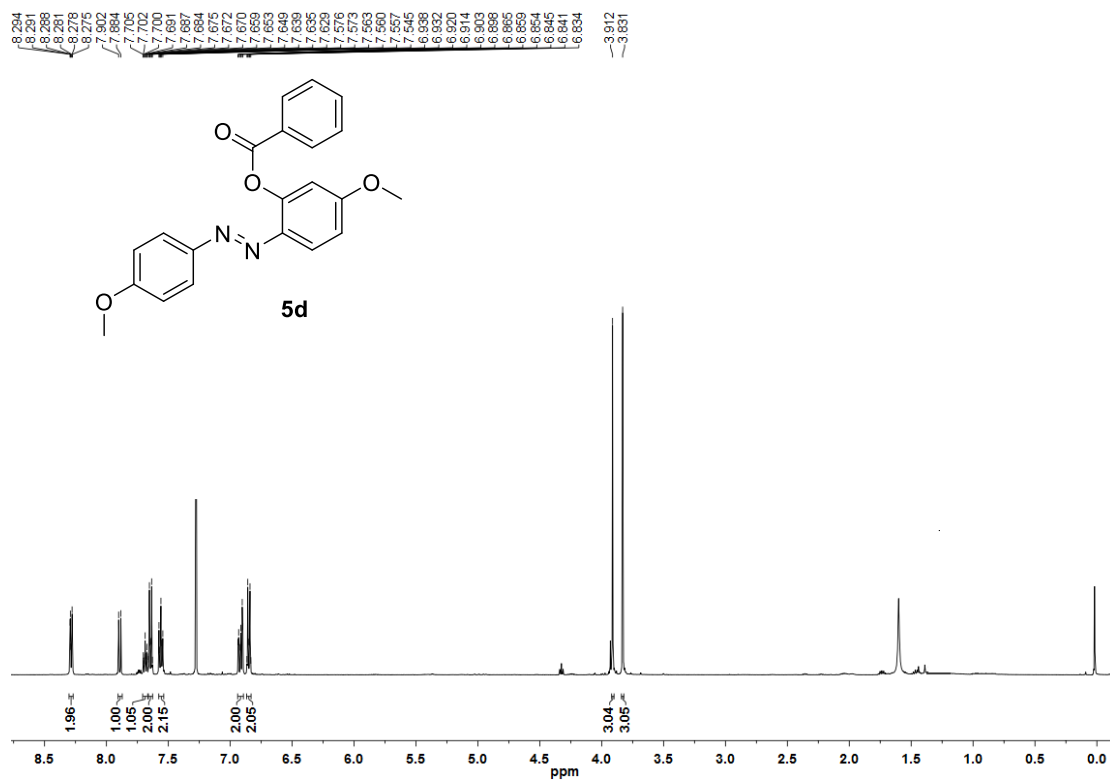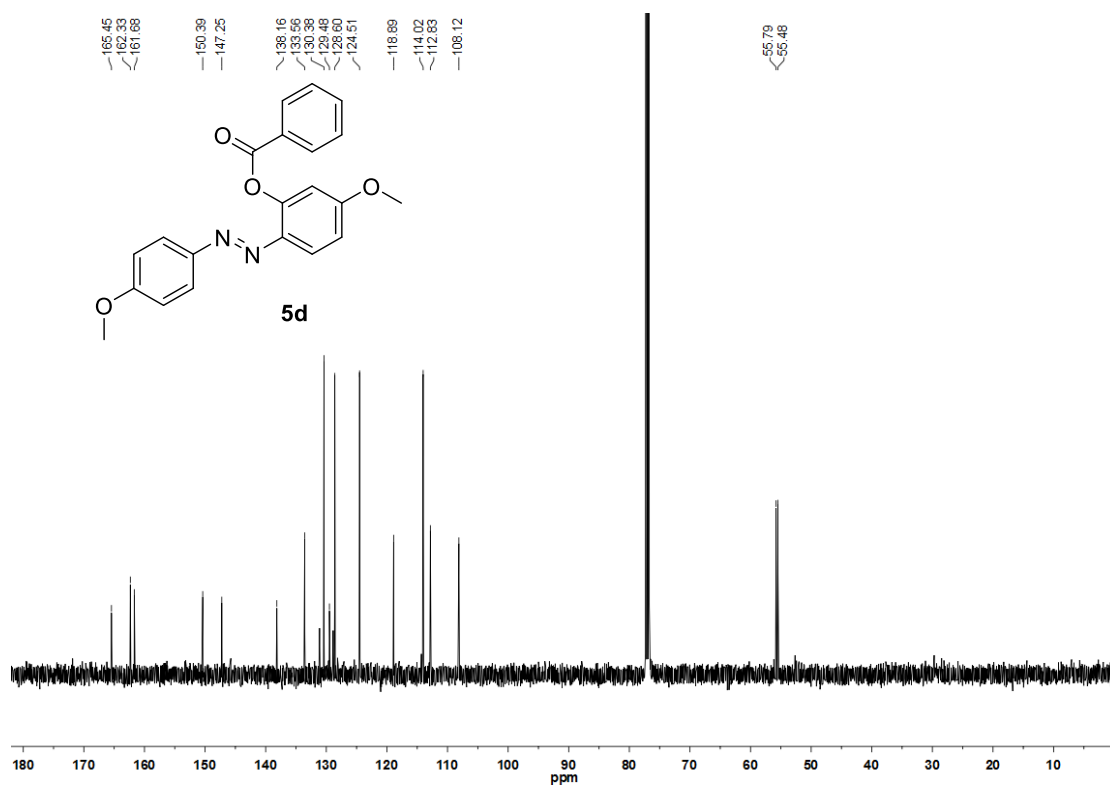

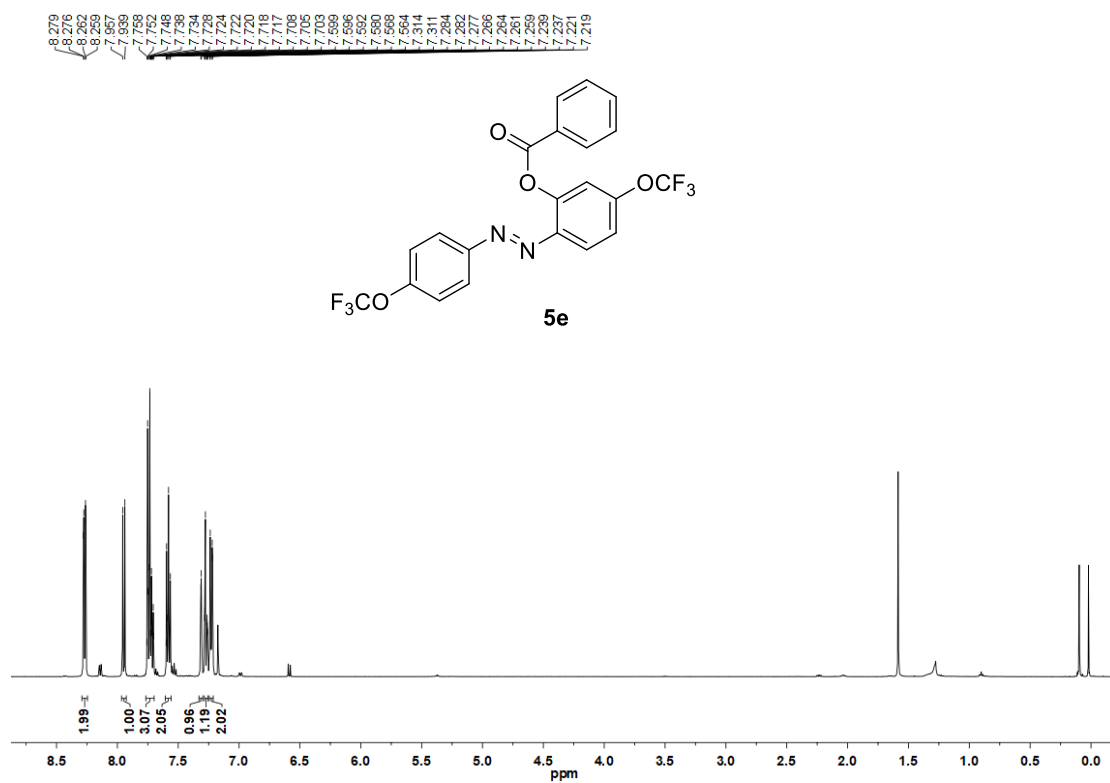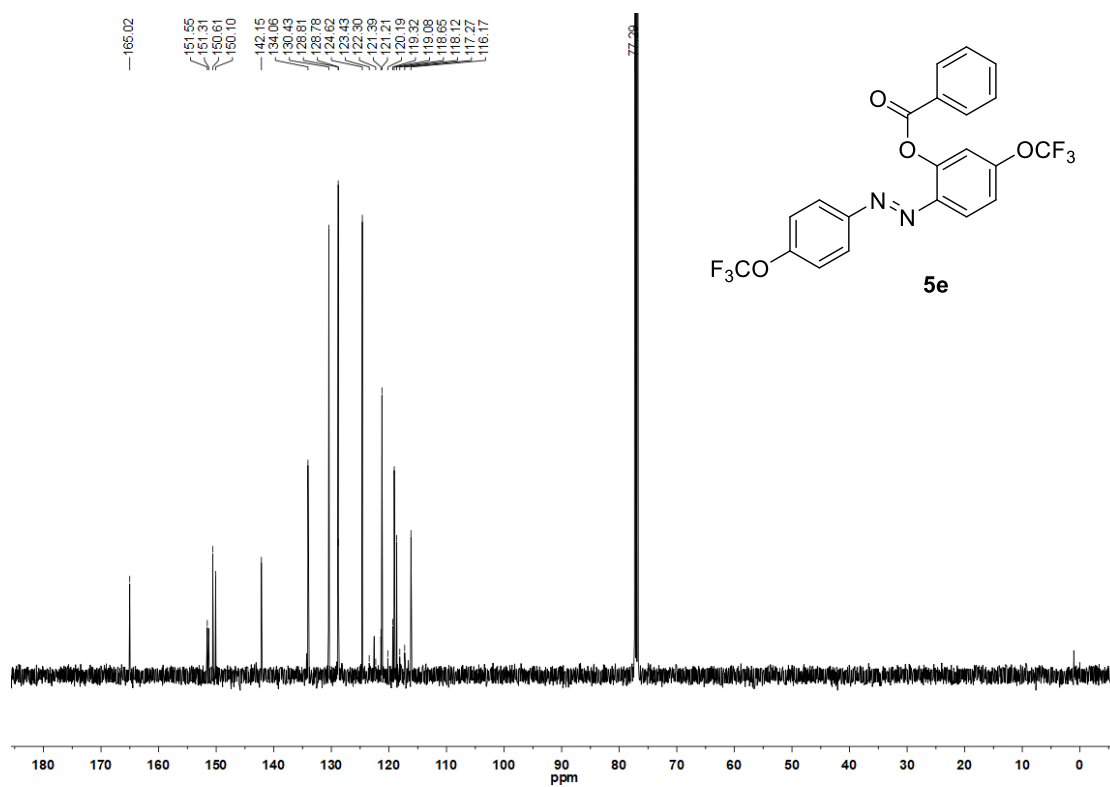

8.280  
8.277  
8.263  
7.990  
7.986  
7.983  
7.947  
7.944  
7.939  
7.934  
7.929  
7.926  
7.909  
7.908  
7.727  
7.725  
7.722  
7.713  
7.710  
7.703  
7.695  
7.685  
7.688  
7.572  
7.572  
7.557  
7.232  
7.227  
7.216  
7.214  
7.211  
7.197  
7.173  
7.168  
7.156  
7.151  
7.142  
7.136  
7.135  
7.124  
7.121  
7.119  
7.108  
7.103  
7.082  
7.075  
7.075  
7.061  
7.068  
7.054  
7.045  
7.041

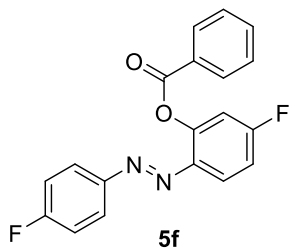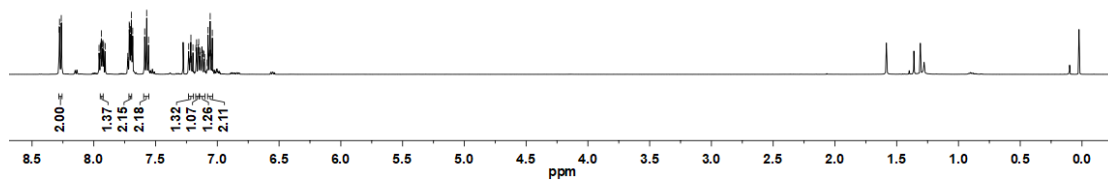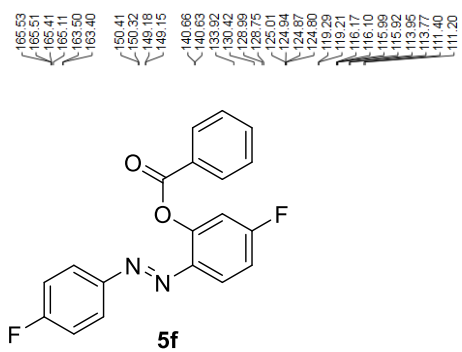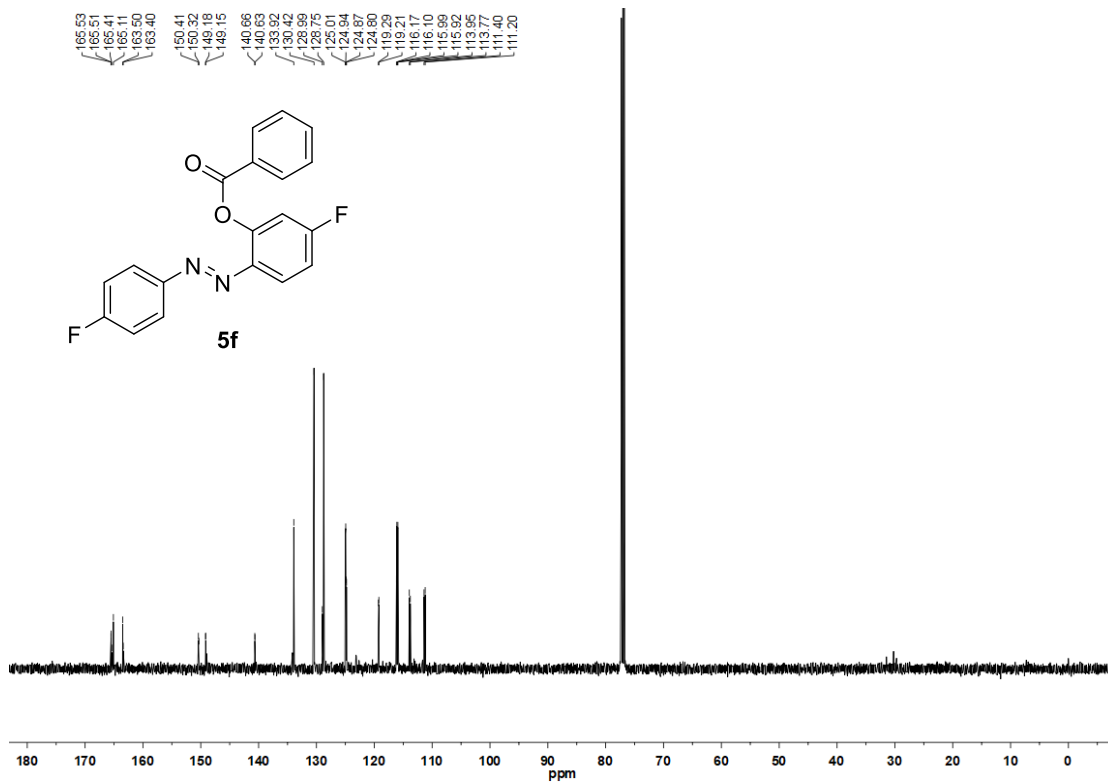

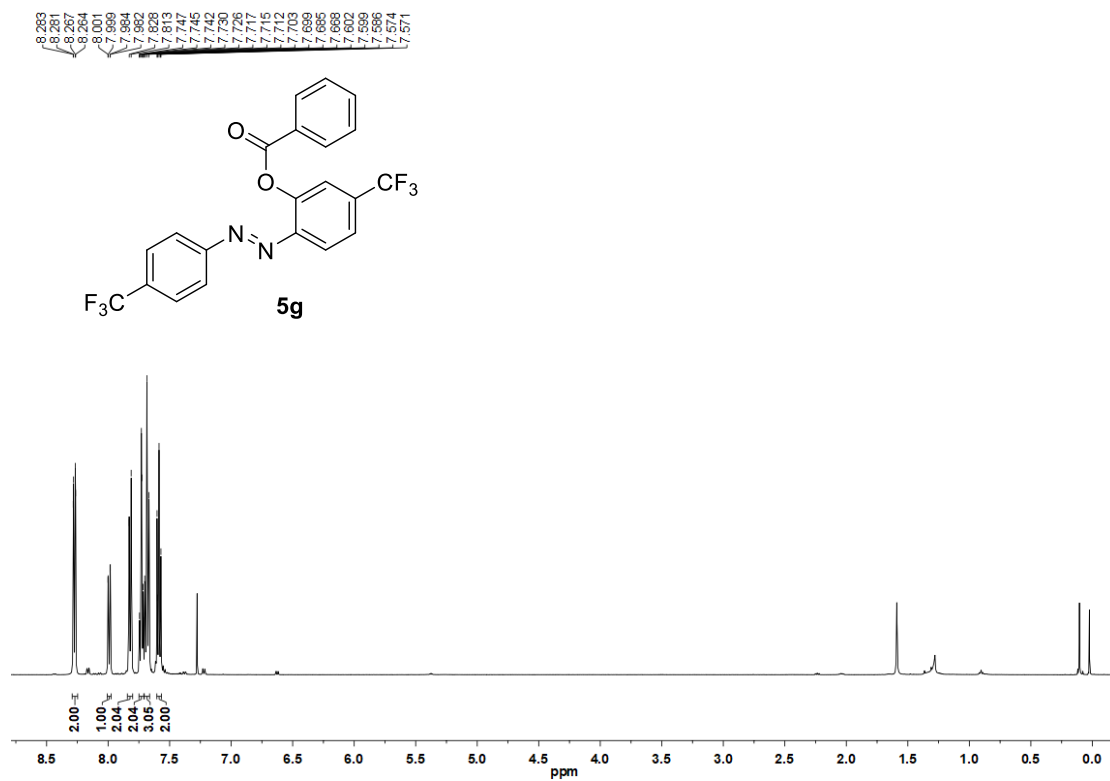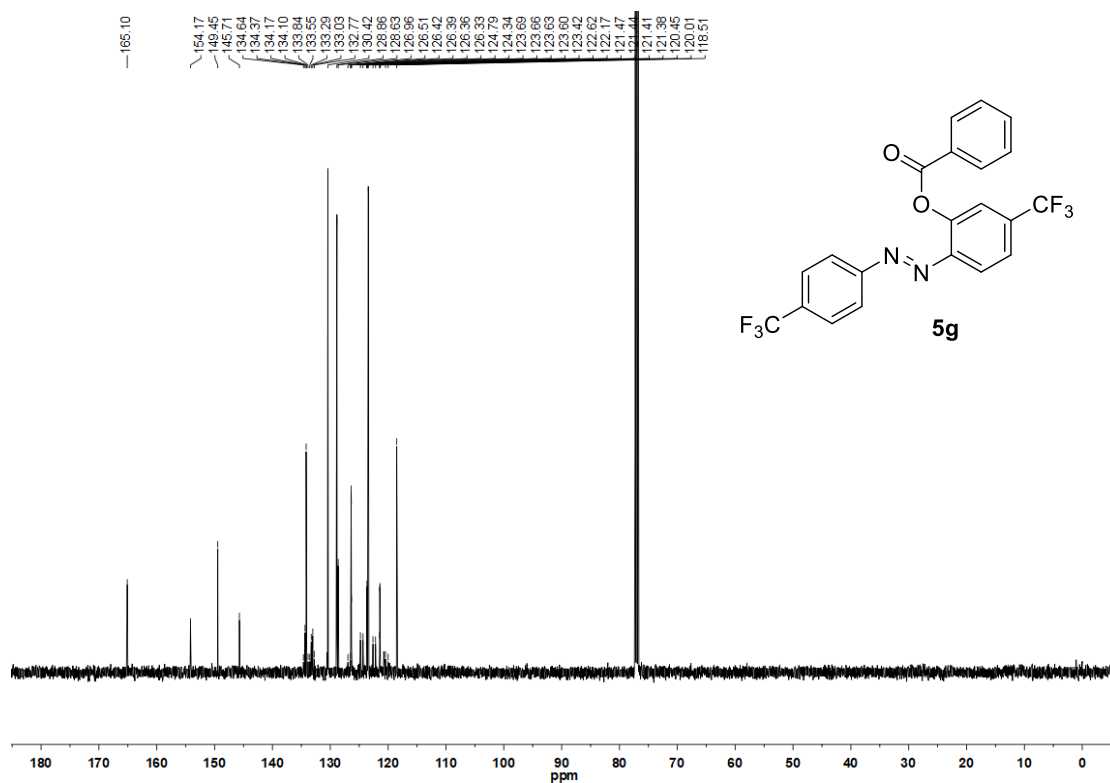



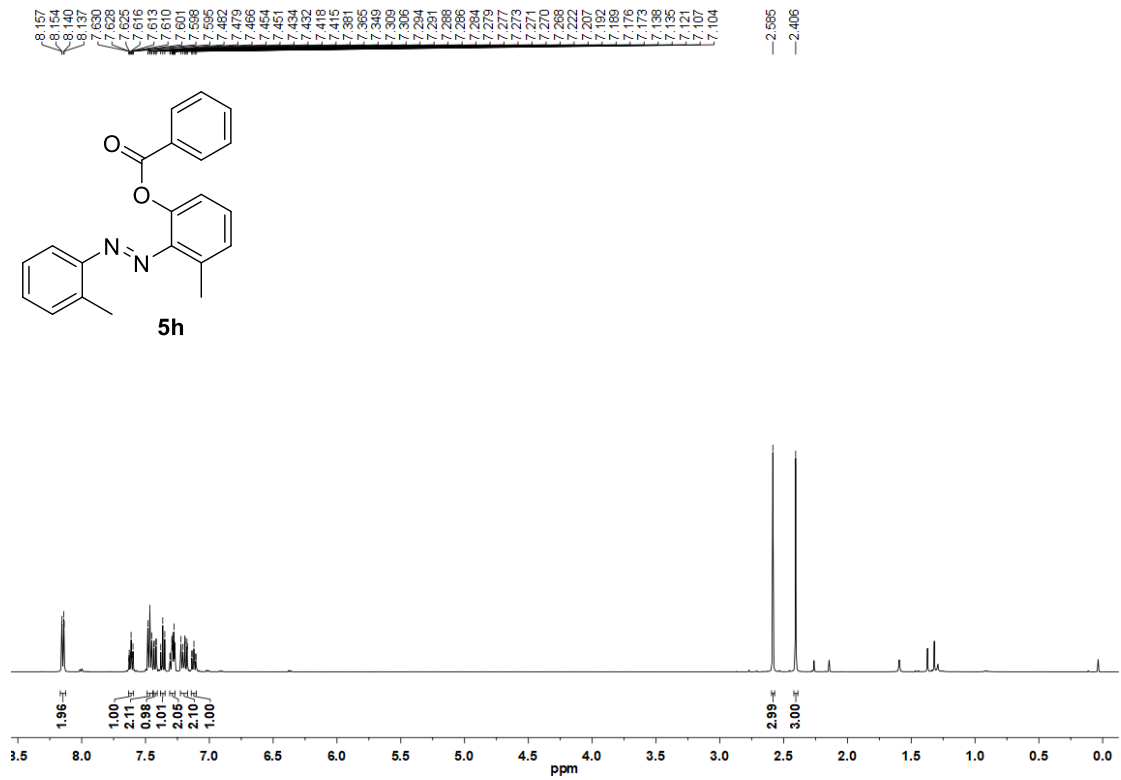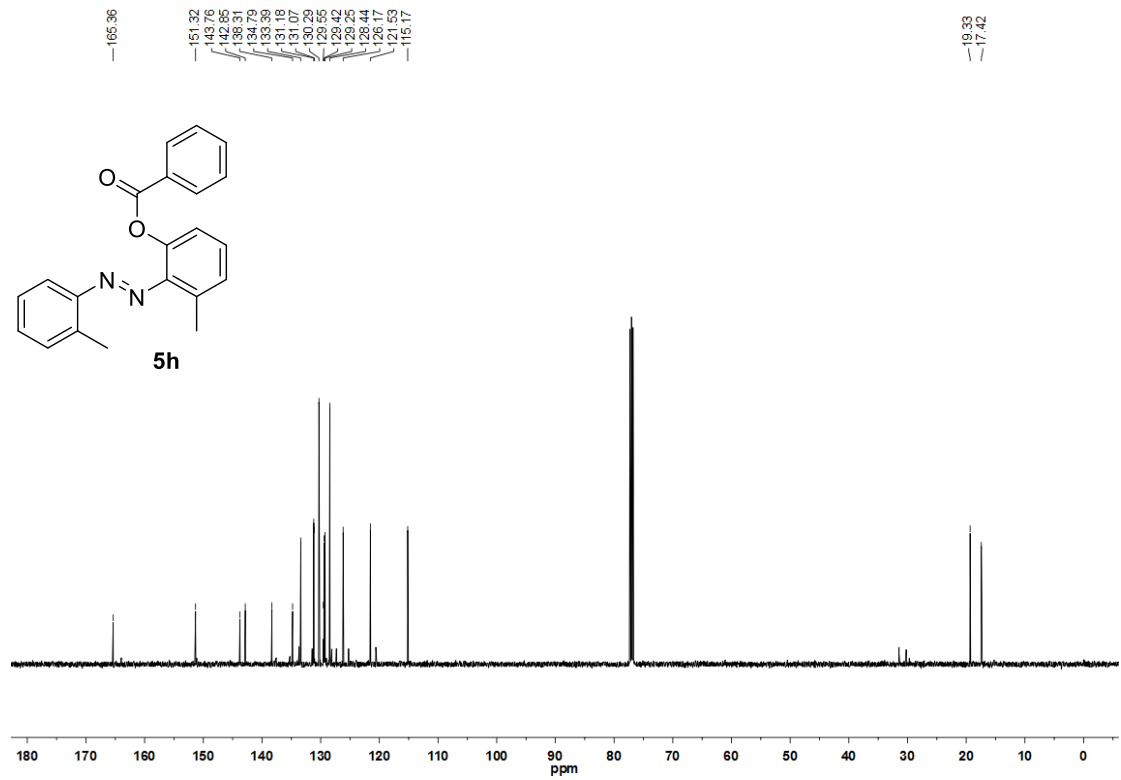

8.319  
8.317  
8.305  
8.303  
7.771  
7.769  
7.697  
7.695  
7.688  
7.686  
7.685  
7.683  
7.674  
7.672  
7.670  
7.613  
7.611  
7.610  
7.608  
7.606  
7.599  
7.597  
7.594  
7.577  
7.574  
7.571  
7.562  
7.562  
7.559  
7.559  
7.551  
7.551  
7.548  
7.534  
7.533  
7.531  
7.500  
7.500  
7.500  
7.480  
7.427  
7.417  
7.413  
7.348  
7.334  
7.332  
7.307  
7.297  
7.268  
7.266  
7.265  
7.253  
7.245  
7.244  
7.242  
7.212  
2.609  
2.797  
2.784  
2.771  
2.605  
2.592  
2.590  
2.589  
1.363  
1.361  
1.358  
1.145  
1.132  
1.120

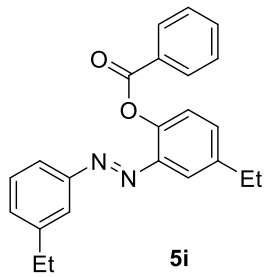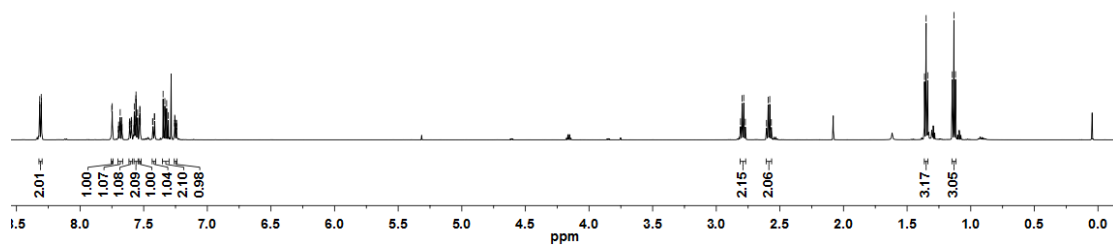

165.81  
153.01  
147.41  
145.12  
143.41  
142.74  
133.52  
131.57  
130.86  
129.64  
128.84  
128.69  
123.17  
121.49  
121.29  
116.73  
28.59  
28.53  
15.50  
15.16

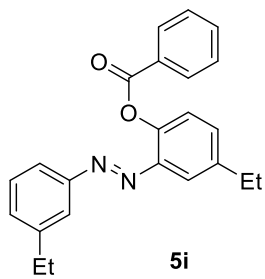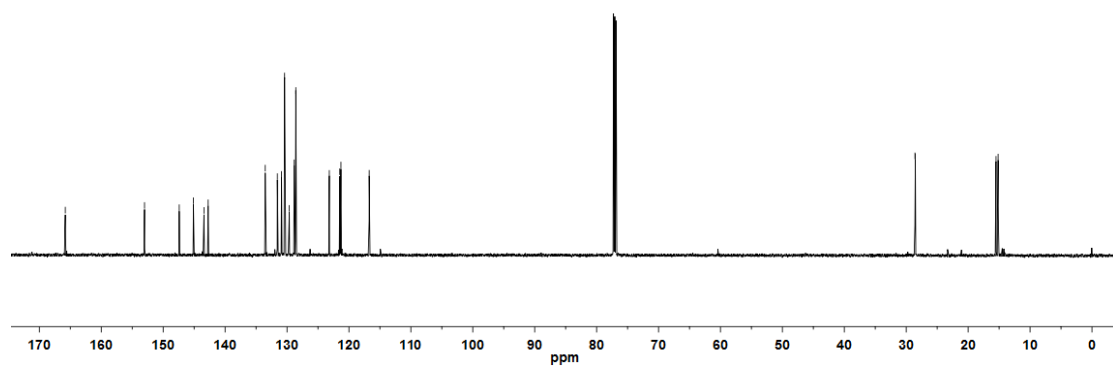

8.306  
8.303  
8.289  
8.285  
7.678  
7.675  
7.667  
7.663  
7.660  
7.651  
7.648  
7.653  
7.537  
7.521  
7.501  
7.498  
7.486  
7.482  
7.445  
7.439  
7.390  
7.334  
7.331  
7.318  
7.293  
7.153  
7.142  
7.135  
7.126  
7.121  
7.118  
6.983  
6.979  
6.976  
6.966  
6.964  
6.961  
3.521  
3.428

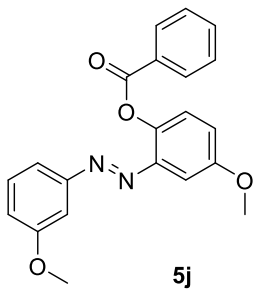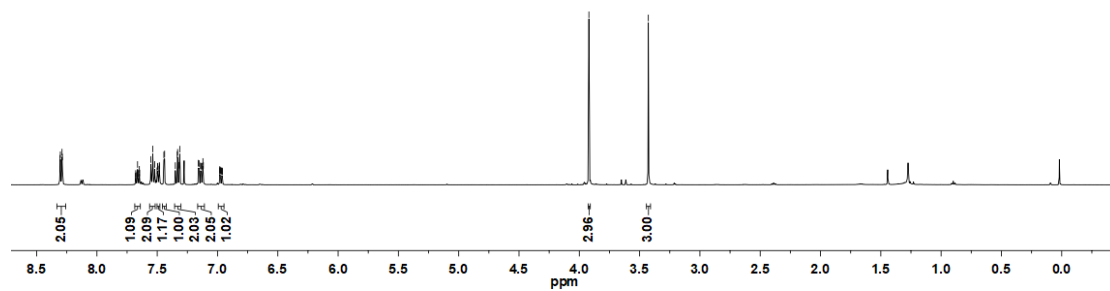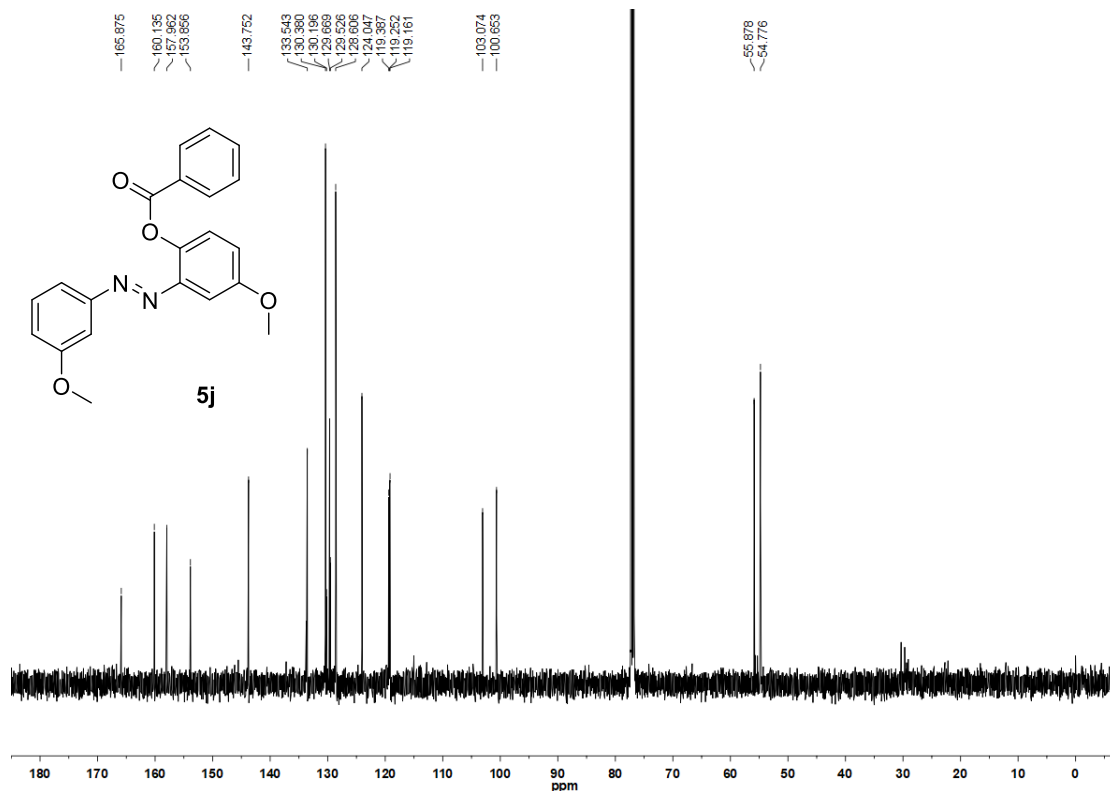

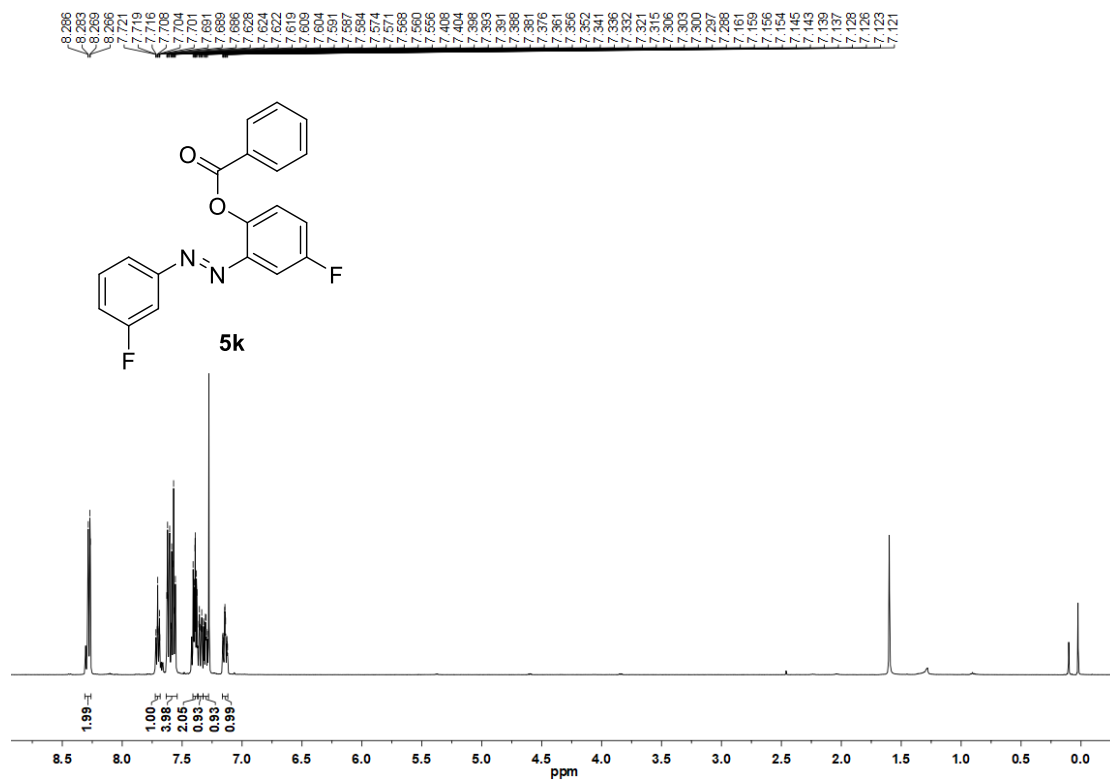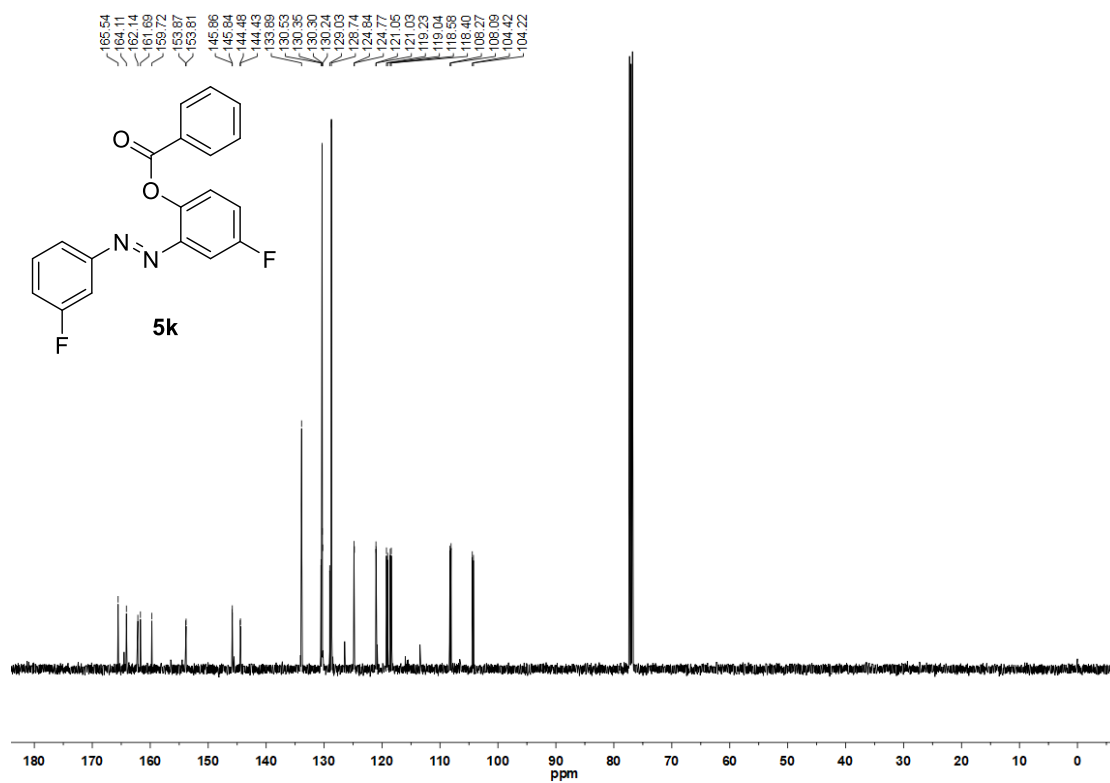

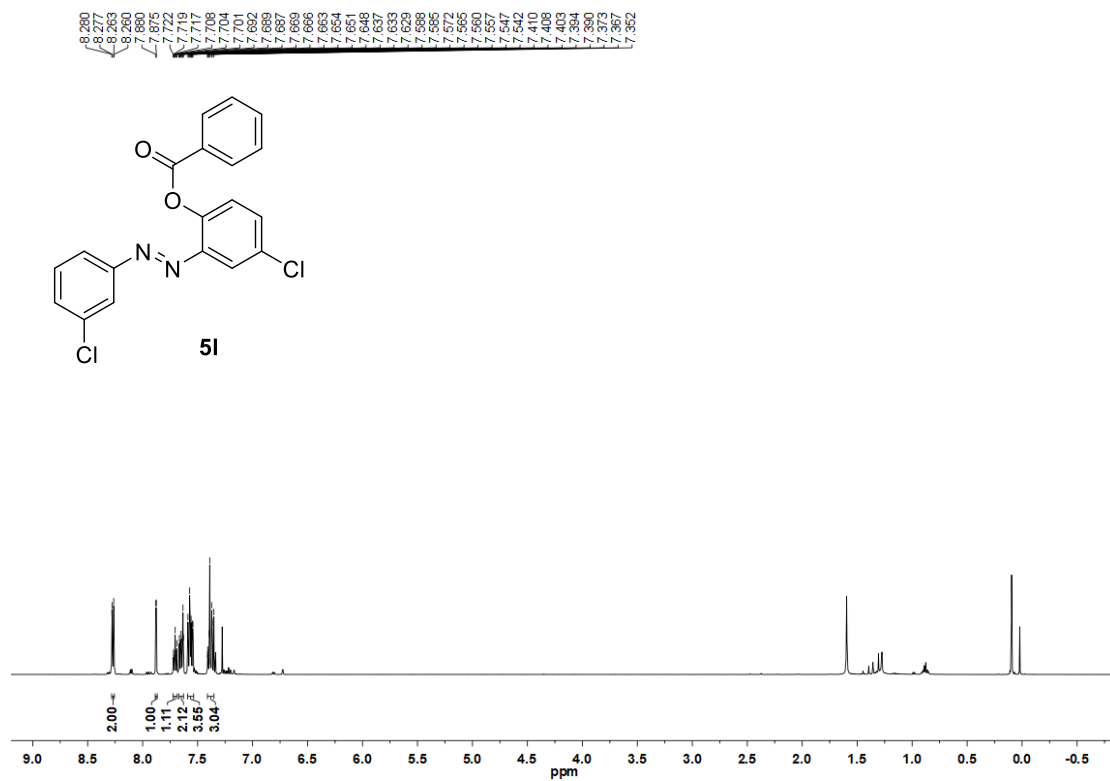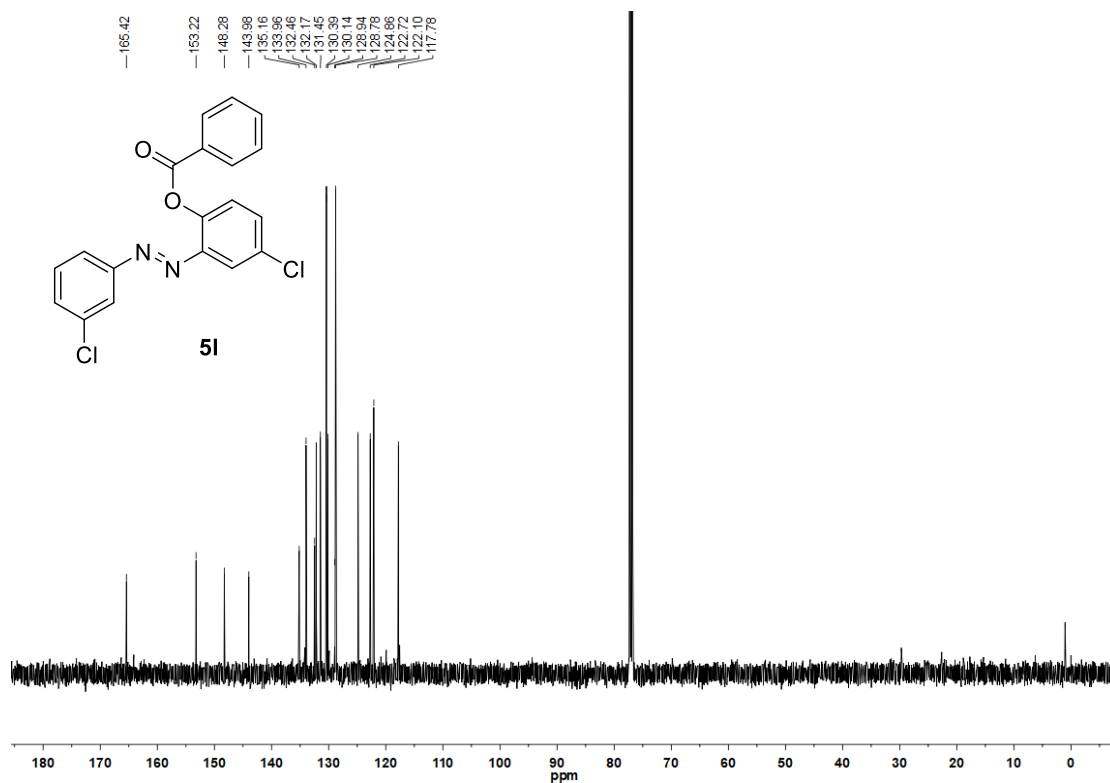

8.281  
8.279  
8.265  
8.050  
8.015  
7.778  
7.774  
7.774  
7.714  
7.712  
7.707  
7.705  
7.702  
7.700  
7.698  
7.698  
7.692  
7.680  
7.680  
7.687  
7.685  
7.685  
7.594  
7.591  
7.590  
7.589  
7.563  
7.563  
7.560  
7.554  
7.552  
7.550  
7.548  
7.538  
7.536  
7.532  
7.532  
7.536  
7.518  
7.508  
7.282  
7.276

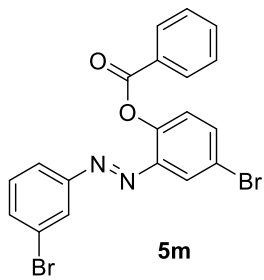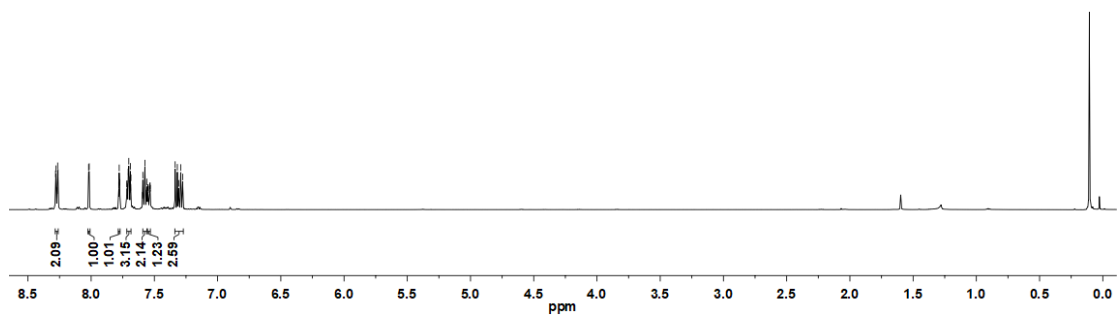

165.33  
153.26  
148.84  
144.09  
135.12  
134.34  
133.97  
130.44  
129.48  
128.91  
128.79  
125.22  
124.90  
123.34  
123.09  
120.73  
120.01

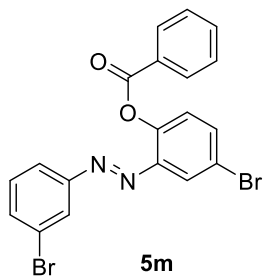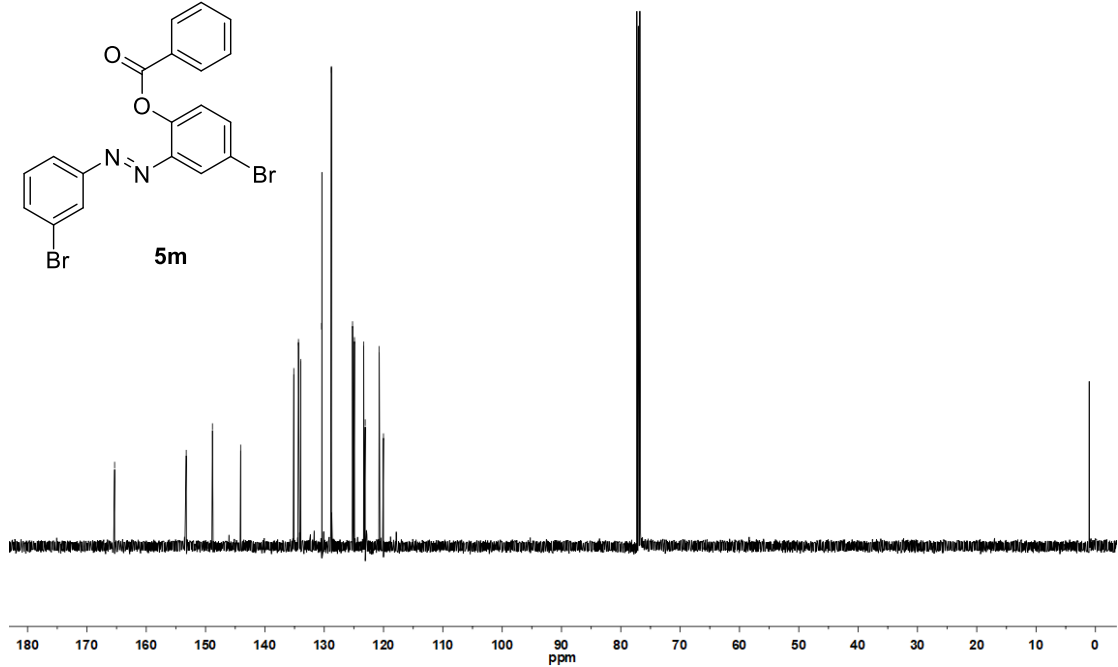

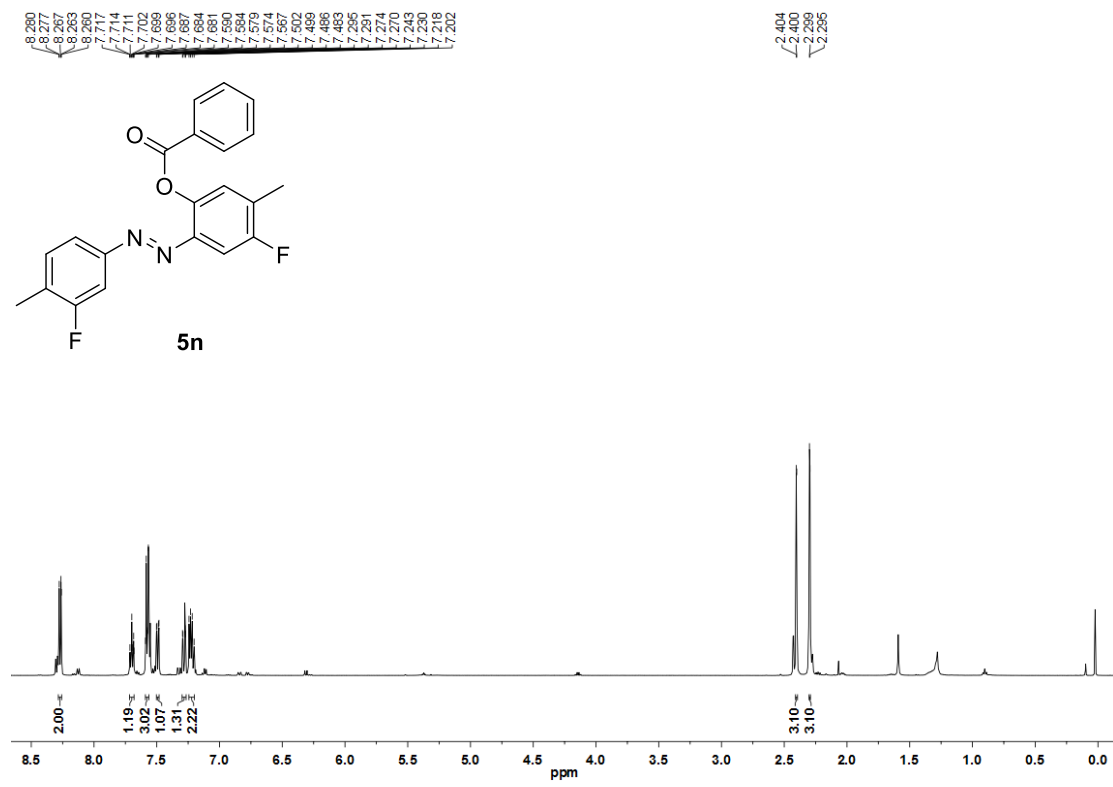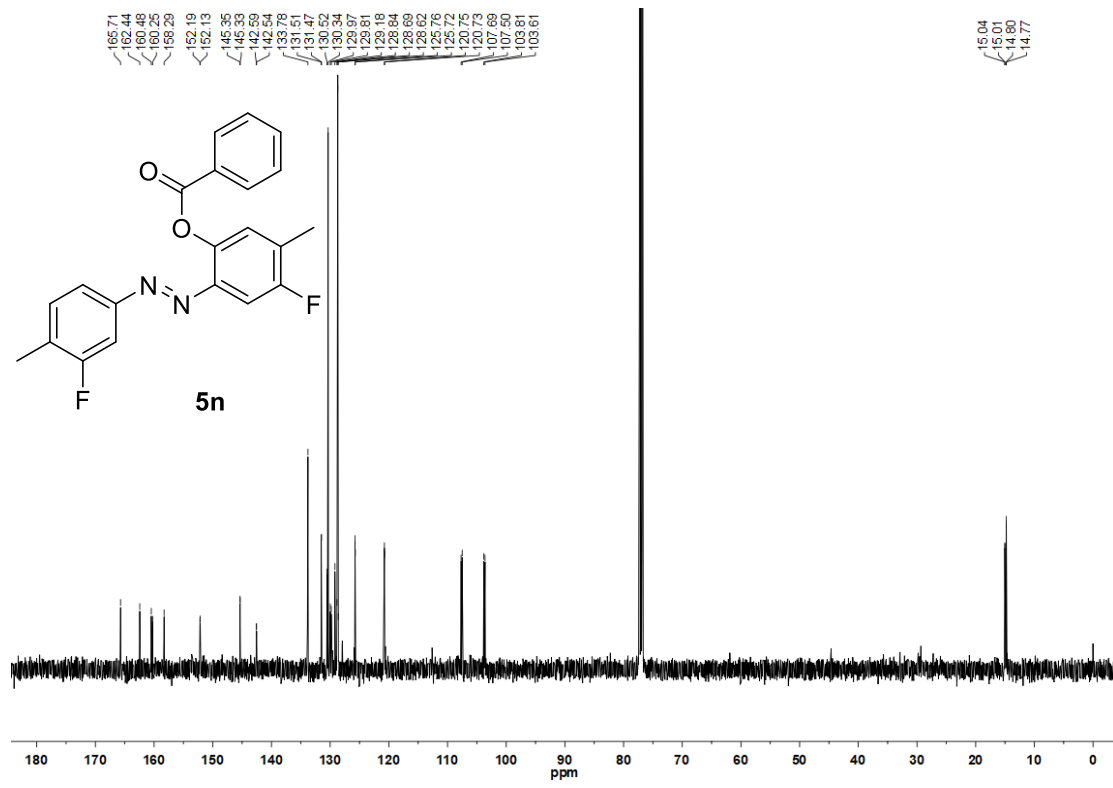

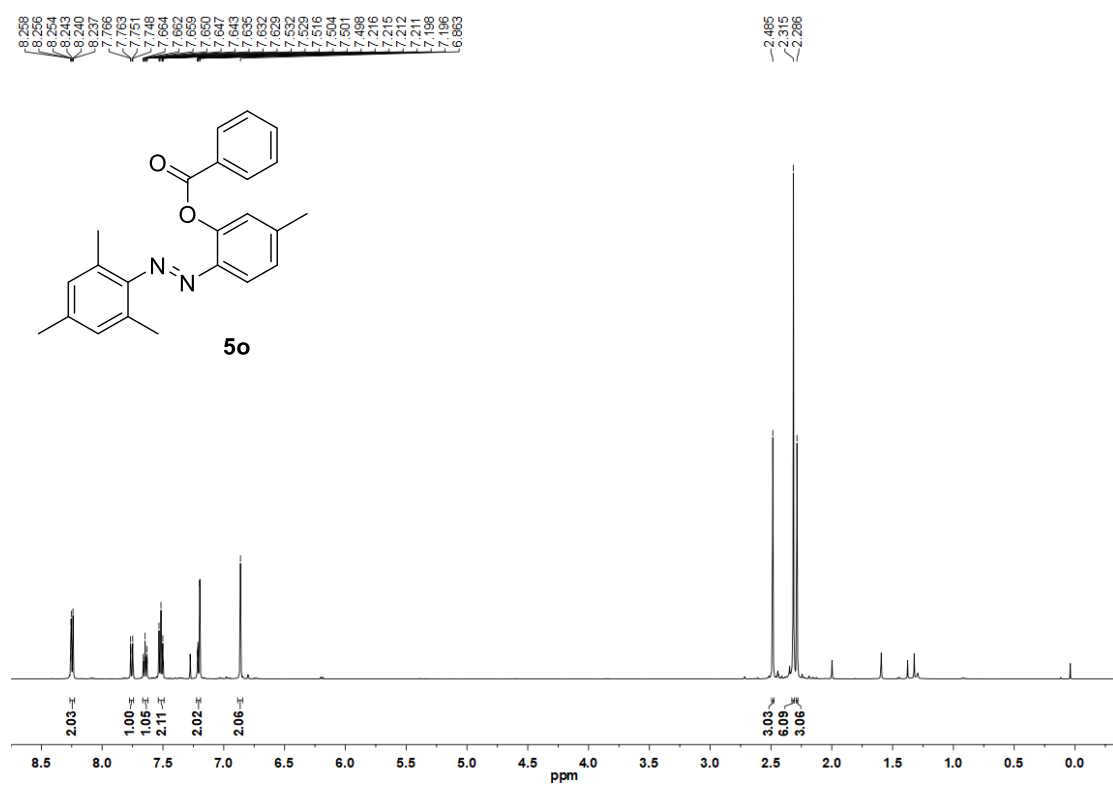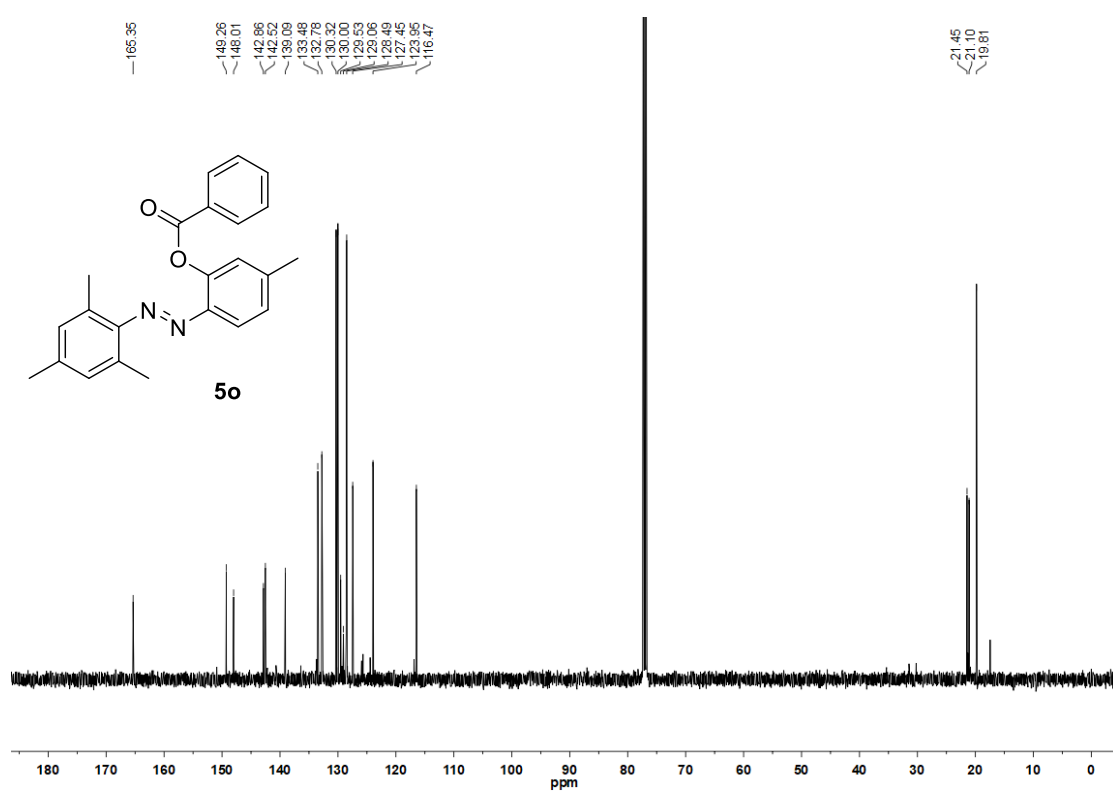



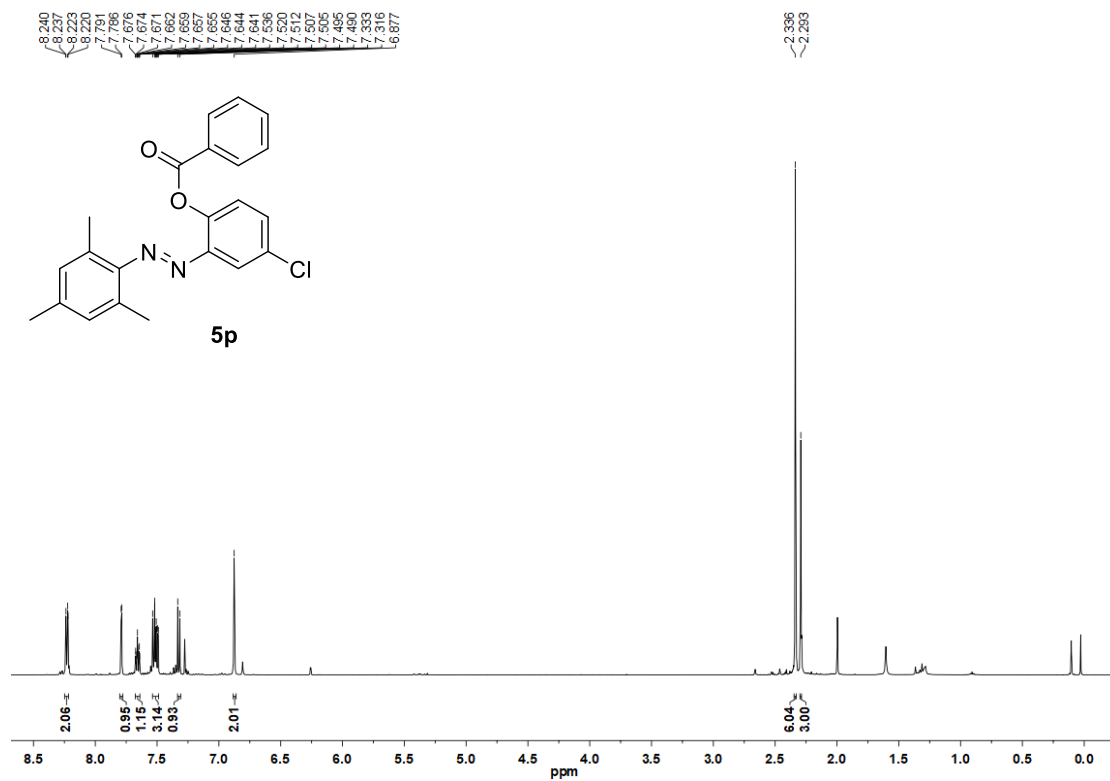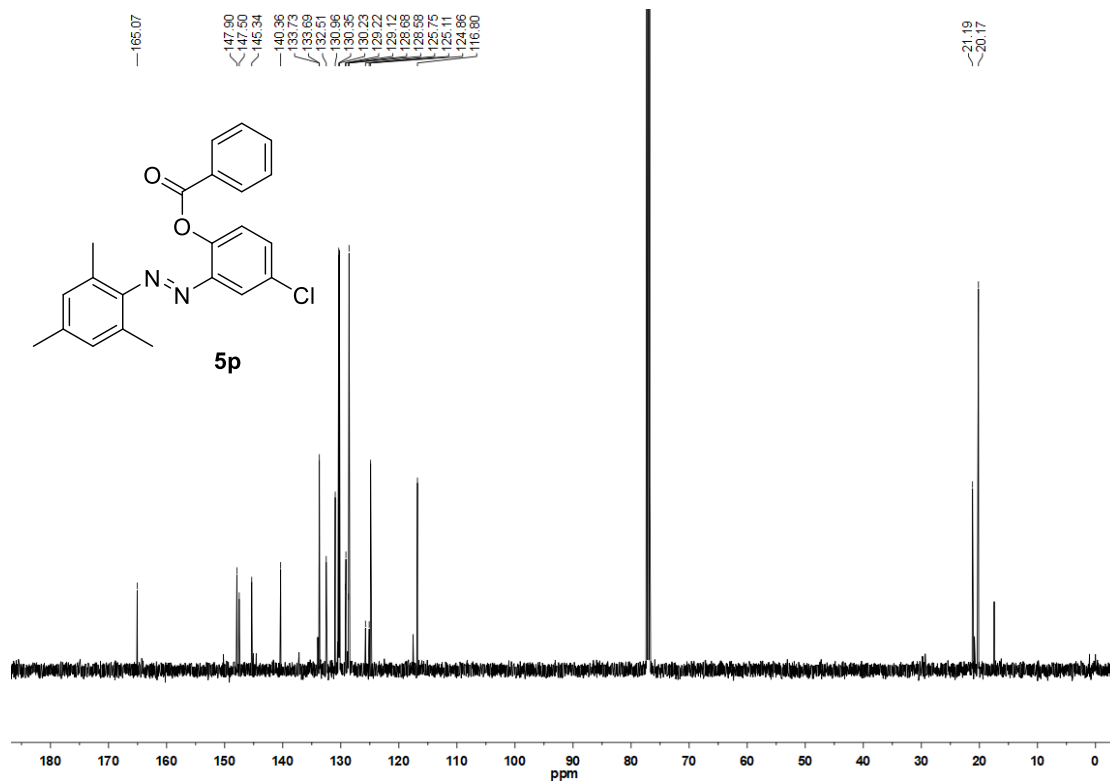

8.289  
8.275  
9.677  
7.887  
7.884  
7.881  
7.713  
7.708  
7.699  
7.692  
7.684  
7.681  
7.678  
7.677  
7.669  
7.663  
7.660  
7.650  
7.646  
7.640  
7.586  
7.581  
7.577  
7.567  
7.560  
7.564  
7.561  
7.553  
7.549  
7.490  
7.428  
7.421  
7.415  
7.413  
7.410  
7.405  
7.402  
7.399  
7.396  
7.395  
7.386  
7.381  
7.357  
7.347  
7.343  
7.338

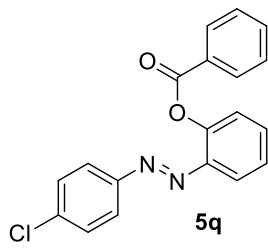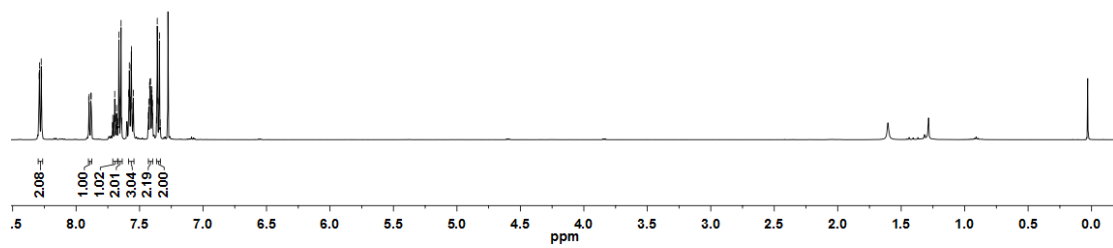

165.49  
151.11  
149.38  
143.80  
137.20  
136.69  
133.37  
130.34  
129.36  
129.26  
128.66  
24.22  
23.61  
17.66

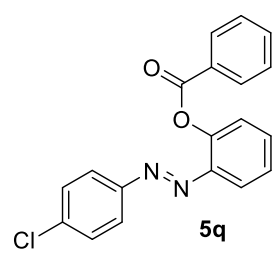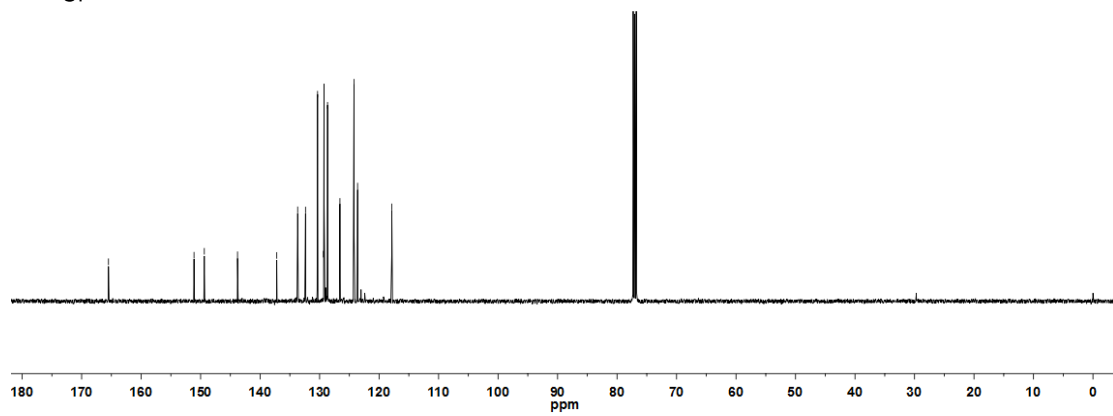

8.285  
8.273  
8.271  
8.268  
7.711  
7.708  
7.706  
7.704  
7.697  
7.695  
7.692  
7.683  
7.681  
7.679  
7.667  
7.663  
7.659  
7.652  
7.646  
7.644  
7.581  
7.579  
7.576  
7.573  
7.566  
7.564  
7.562  
7.560  
7.553  
7.550  
7.548  
7.548  
7.406  
7.404  
7.403  
7.393  
7.383  
7.390  
7.389  
7.389  
7.384  
7.381  
7.380  
7.375  
7.346  
7.300  
7.285

-2.475

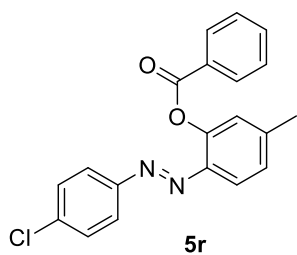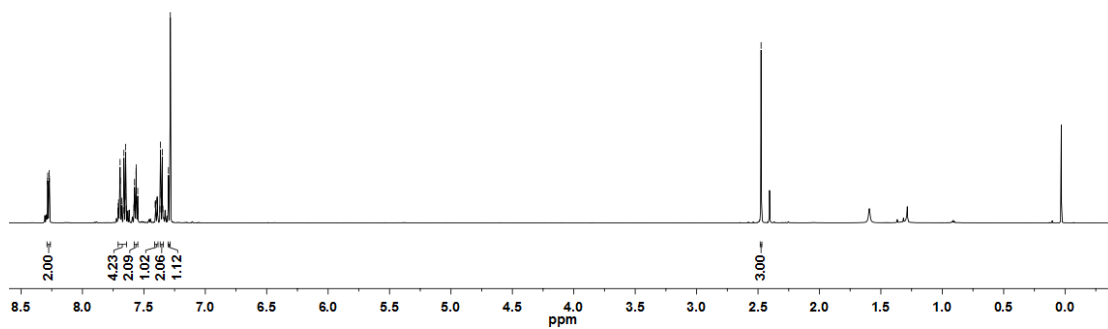

165.69  
151.12  
147.26  
143.31  
137.10  
136.55  
133.64  
133.12  
132.43  
129.43  
129.26  
128.65  
124.18  
123.24  
117.96

-21.07

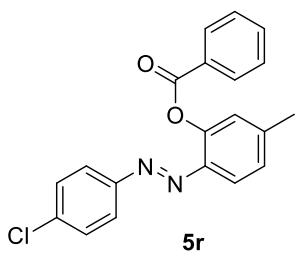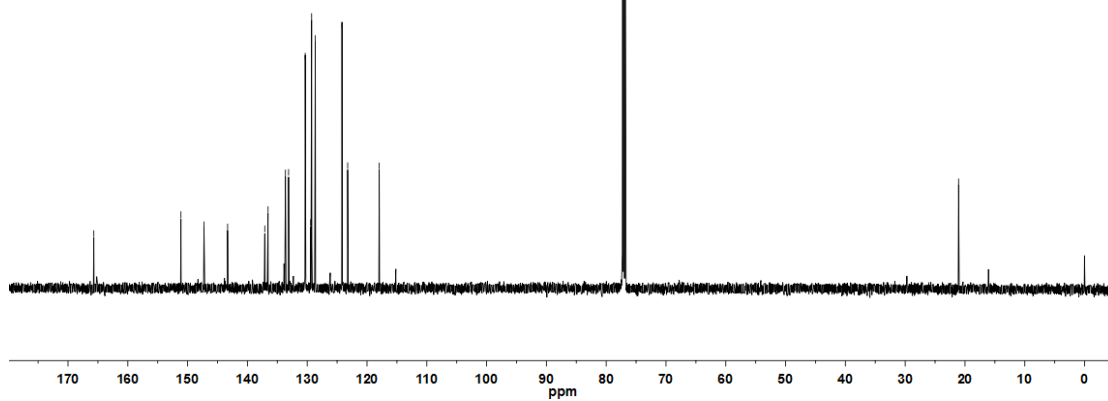

8.331  
8.320  
8.313  
7.920  
7.907  
7.904  
7.745  
7.742  
7.730  
7.729  
7.692  
7.689  
7.577  
7.573  
7.561  
7.558  
7.480  
7.480  
7.483  
7.480  
7.421  
7.421  
7.409  
7.406  
7.401  
7.399  
7.395  
7.386  
7.386  
7.253  
7.249  
7.242  
7.239  
7.236  
7.232  
7.229  
7.229  
7.218

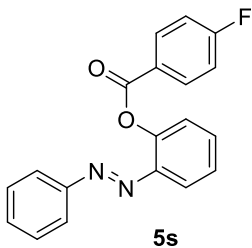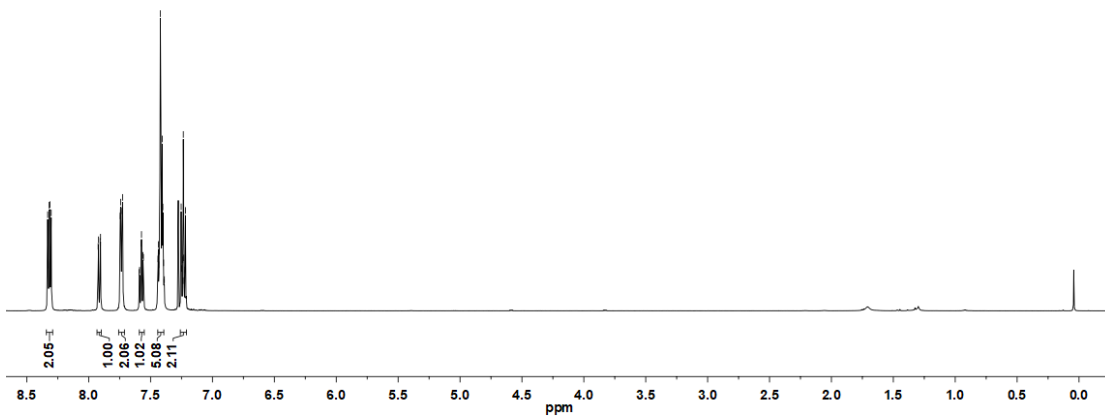

167.23  
165.20  
164.50  
152.72  
149.09  
143.94  
133.03  
132.96  
131.33  
131.32  
129.102  
126.67  
125.71  
125.69  
23.49  
23.00  
11.65  
11.65  
15.77

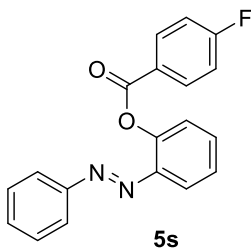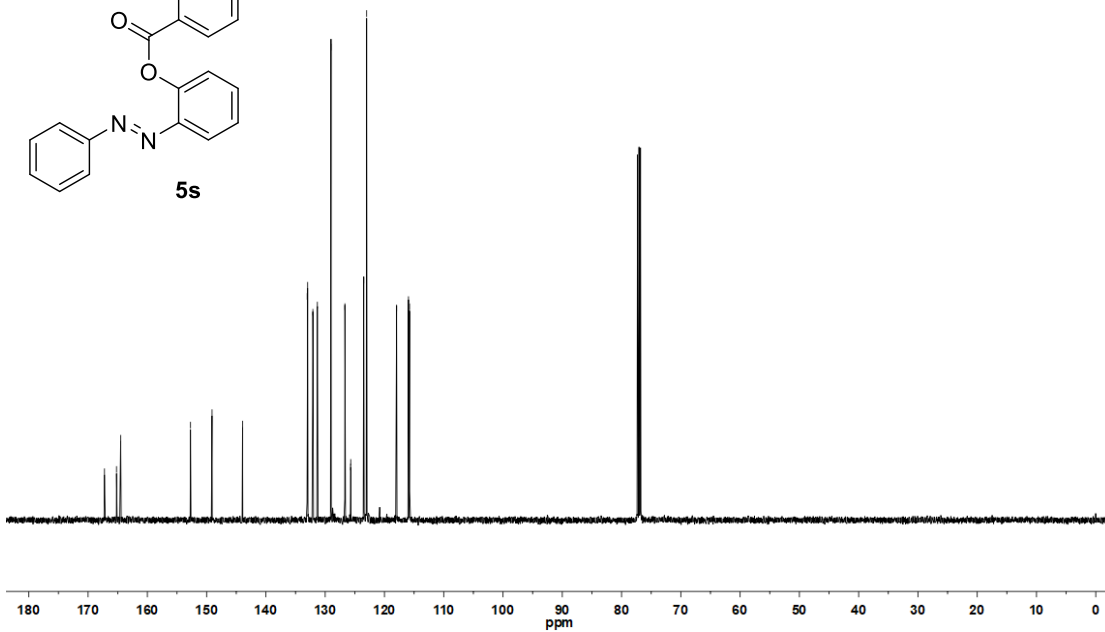

8.369  
8.354  
7.929  
7.915  
7.912  
7.900  
7.786  
7.769  
7.766  
7.757  
7.754  
7.729  
7.722  
7.719  
7.713  
7.710  
7.708  
7.705  
7.695  
7.690  
7.594  
7.590  
7.581  
7.578  
7.545  
7.552  
7.519  
7.470  
7.468  
7.461  
7.458  
7.455  
7.448  
7.446  
7.444  
7.441  
7.435  
7.433  
7.431  
7.428  
7.423  
7.421  
7.419  
7.416  
7.414  
7.412  
7.410  
7.408  
7.404  
7.402  
7.401

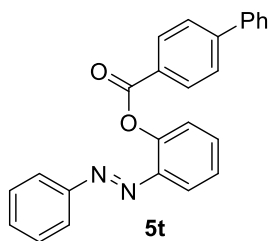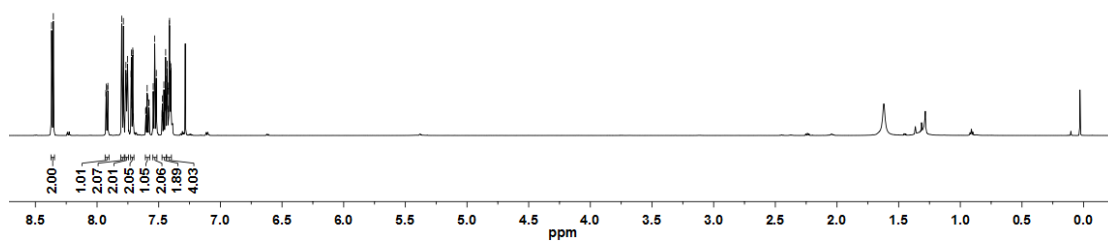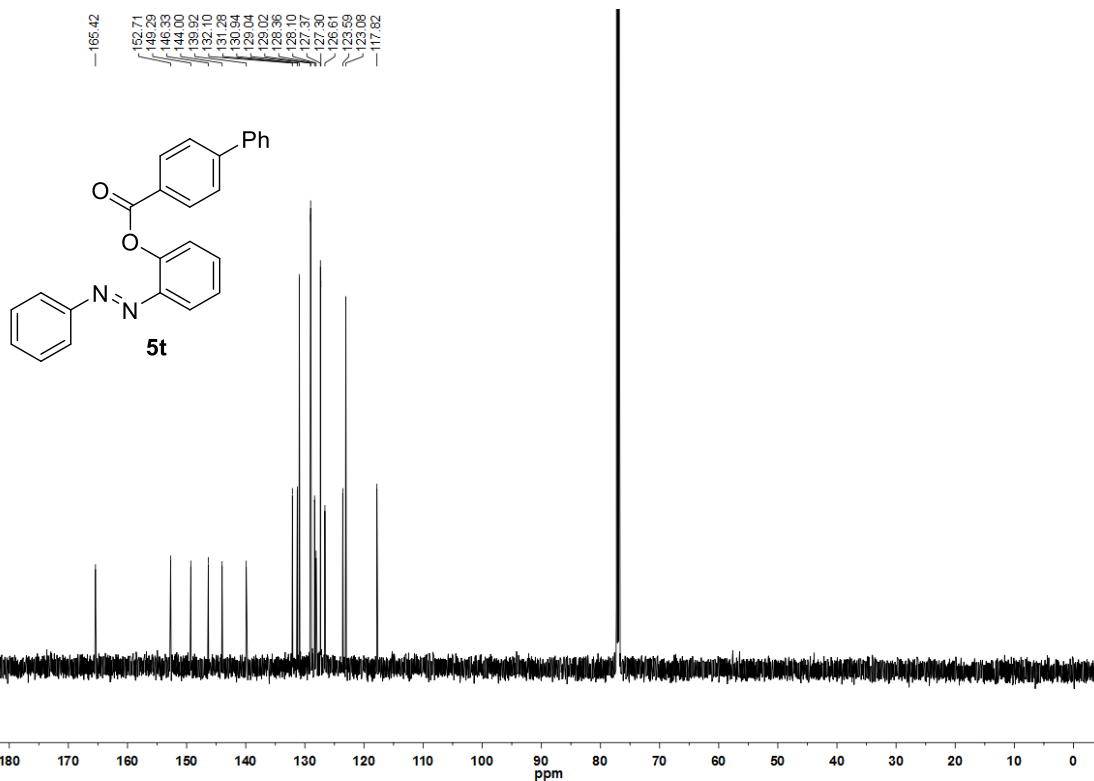

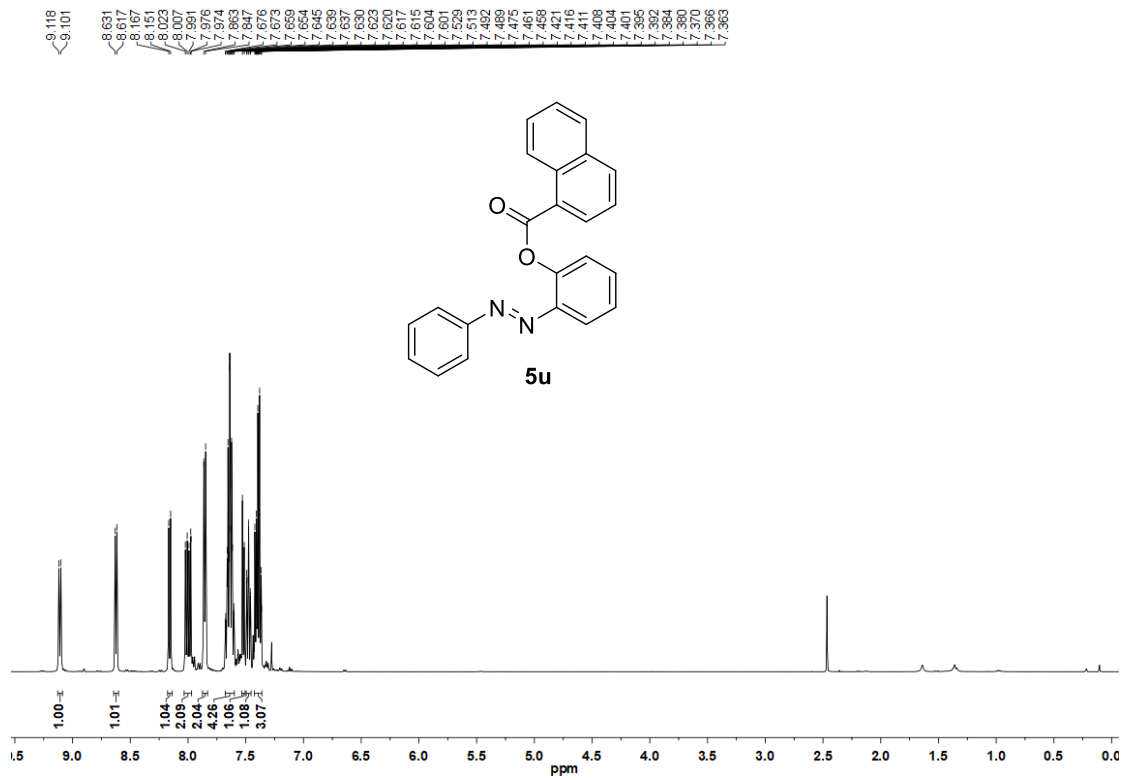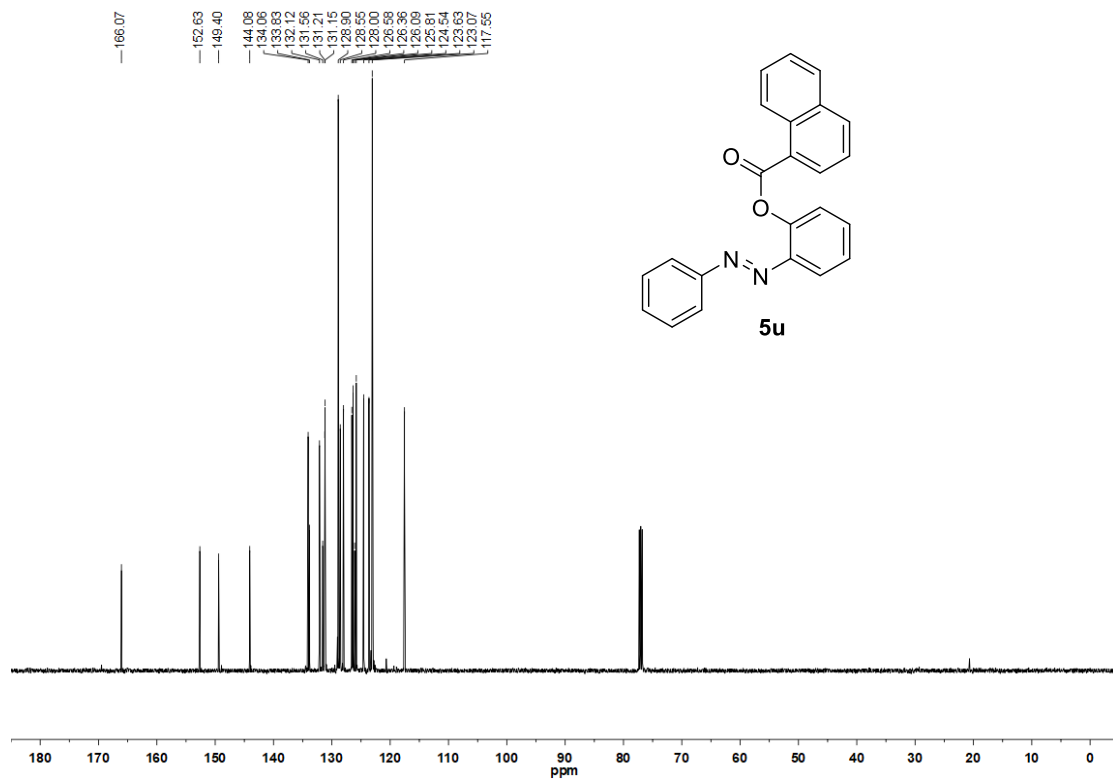

8.419  
8.417  
8.413  
8.411  
7.920  
7.903  
7.900  
7.780  
7.776  
7.767  
7.765  
7.750  
7.750  
7.750  
7.747  
7.747  
7.593  
7.590  
7.598  
7.596  
7.594  
7.554  
7.549  
7.549  
7.432  
7.432  
7.430  
7.426  
7.422  
7.419  
7.415  
7.413  
7.402  
7.399

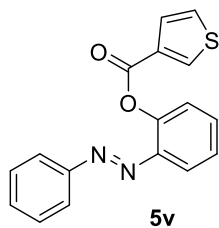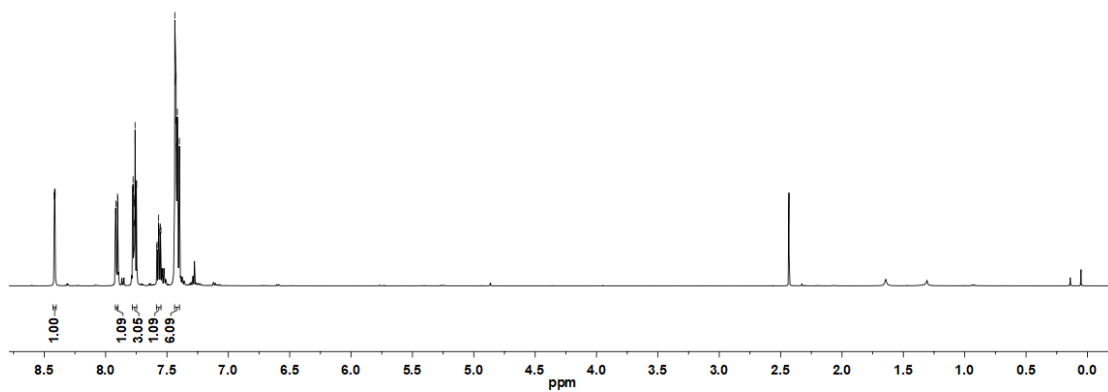

161.21  
152.70  
148.88  
143.96  
134.22  
132.61  
132.00  
131.23  
128.34  
126.54  
126.37  
123.51  
123.01  
117.81

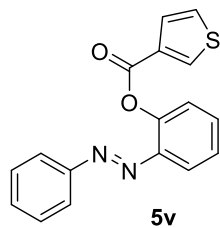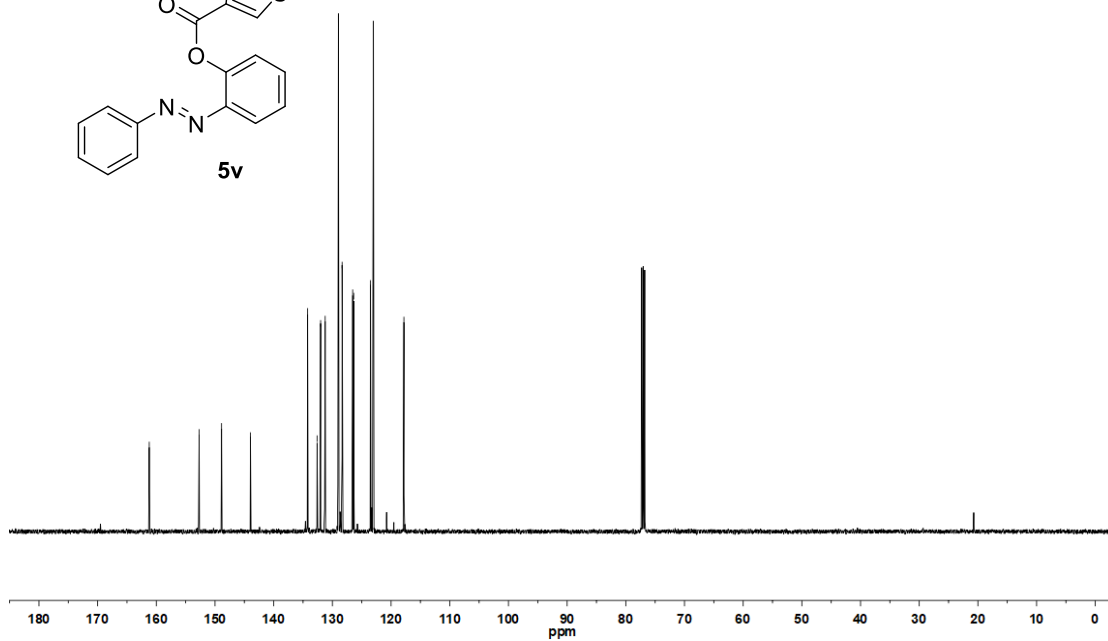

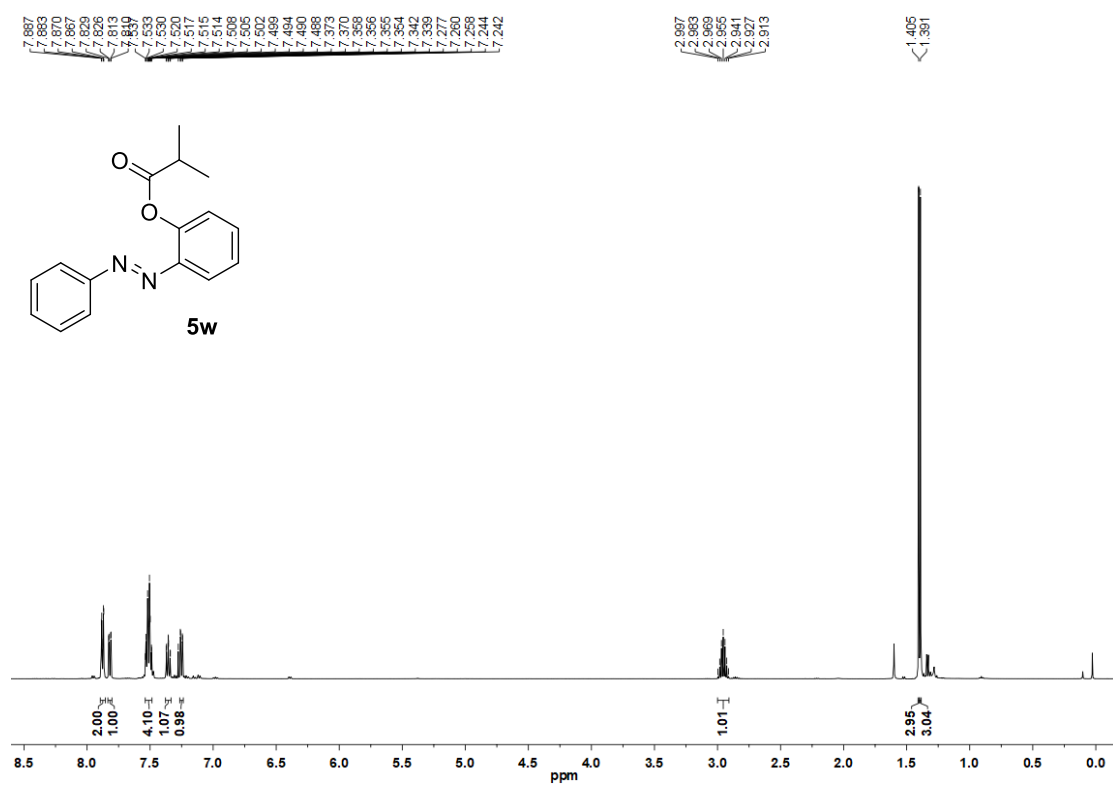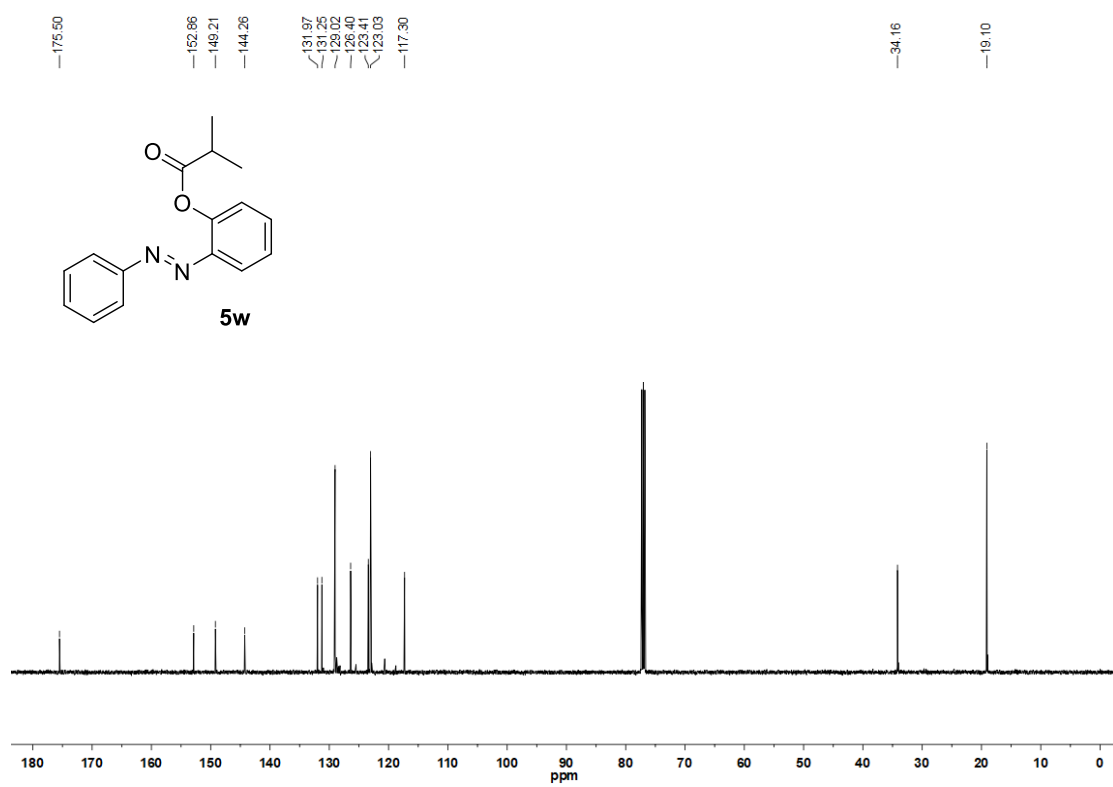



7.893  
7.890  
7.843  
7.840  
7.839  
7.837  
7.517  
7.504  
7.493  
7.373  
7.347  
7.282  
7.279

2.019  
2.011  
1.995  
1.981  
1.985  
1.979  
1.278  
1.271  
1.266  
1.253  
1.253  
1.110  
1.103  
1.089  
1.081  
1.085  
1.079

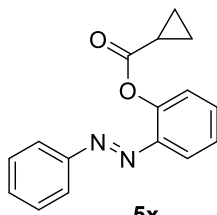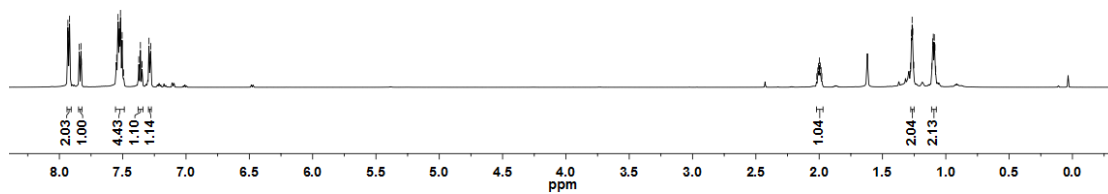

—173.57  
—152.84  
—149.17  
—144.01  
—132.05  
—131.33  
—129.05  
—128.33  
—123.39  
—123.11  
—117.39  
—12.96  
—9.23

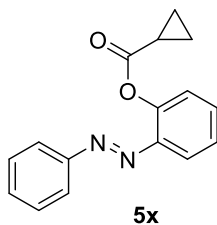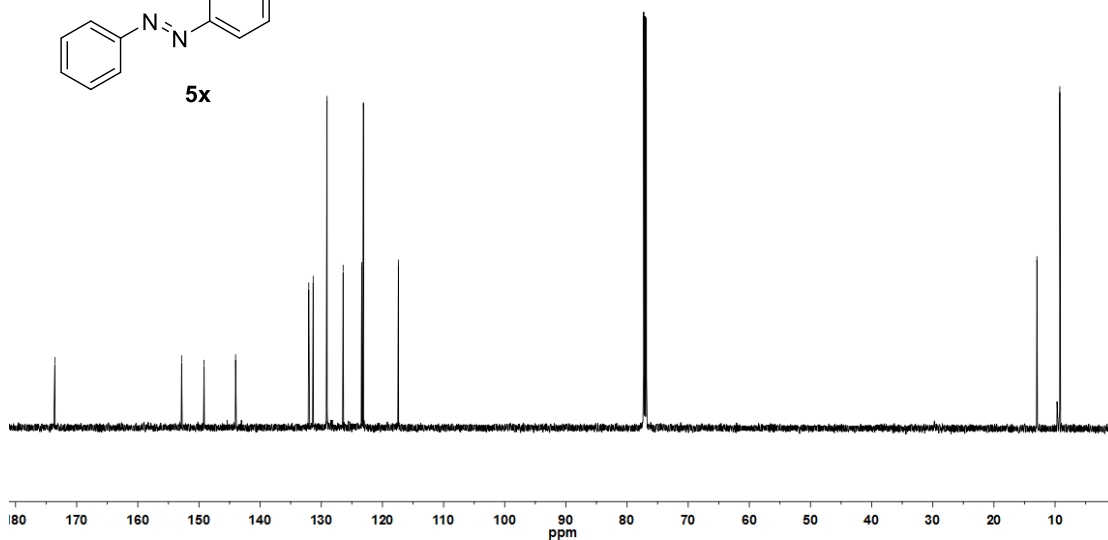

7.888  
7.884  
7.880  
7.875  
7.871  
7.866  
7.839  
7.836  
7.823  
7.820  
7.837  
7.834  
7.831  
7.830  
7.819  
7.816  
7.808  
7.804  
7.801  
7.888  
7.885  
7.880  
7.875  
7.872  
7.868  
7.866  
7.856  
7.844  
7.841  
7.838  
7.835  
7.832  
7.829  
7.825  
7.822  
7.819  
3.550  
3.549  
3.532  
3.515  
3.513  
3.510  
3.507  
2.570  
2.564  
2.550  
2.537  
2.532  
2.520  
2.515  
2.513  
2.426  
2.422  
2.413  
2.409  
2.405  
2.398  
2.395  
2.393  
2.389  
2.384  
2.380  
2.376  
2.371  
2.368  
2.363  
2.350  
2.346  
2.313  
2.108  
2.095  
2.090  
2.073  
2.065  
2.045  
2.036  
2.032  
2.026  
2.018  
2.014  
2.012  
2.003

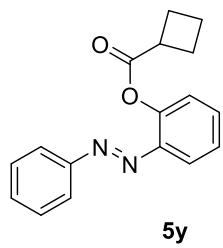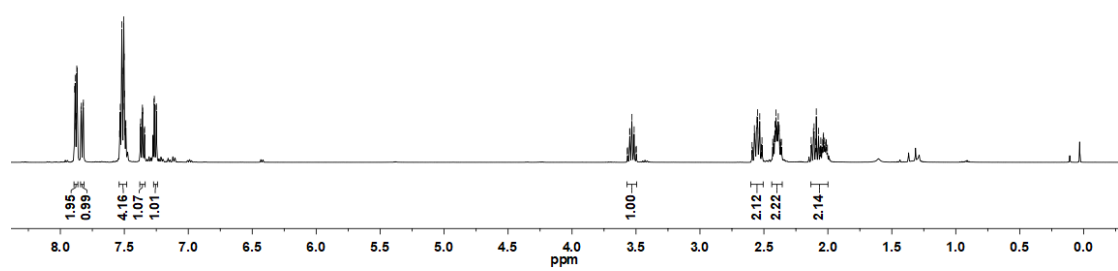

173.90  
152.87  
149.22  
144.17  
132.03  
131.27  
129.03  
126.41  
123.42  
123.03  
117.32  
38.07  
25.40  
18.56

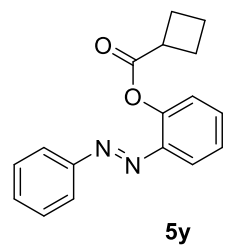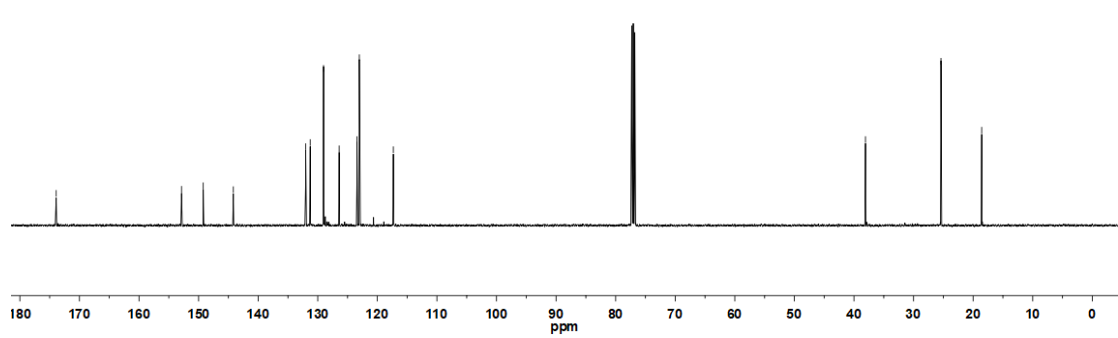

## X. DFT optimized Cartesian coordinates of all structures

Optimized Cartesian coordinates and single-point calculation energies ( $\Delta E_{(\text{SCF Done})}$ , a.u.) for all of the stationary as well as the imaginary frequencies (IF,  $\text{cm}^{-1}$ ) of transition states.

**I<sub>Cl</sub>,  $\Delta E_{(\text{SCF Done})} = -1620.848646$  a.u.**

|    |              |              |              |
|----|--------------|--------------|--------------|
| N  | -0.439509000 | -0.568795000 | -0.034504000 |
| N  | 0.375900000  | -1.512287000 | 0.009465000  |
| C  | -1.832273000 | -0.917321000 | -0.033895000 |
| C  | -2.252114000 | -2.130898000 | 0.530579000  |
| C  | -2.751842000 | -0.030339000 | -0.603869000 |
| C  | -3.604656000 | -2.452532000 | 0.512342000  |
| H  | -1.522301000 | -2.792510000 | 0.981976000  |
| C  | -4.102417000 | -0.371231000 | -0.623580000 |
| H  | -2.405158000 | 0.901857000  | -1.038296000 |
| C  | -4.531159000 | -1.577126000 | -0.064840000 |
| H  | -3.938877000 | -3.384467000 | 0.958410000  |
| H  | -4.818268000 | 0.309381000  | -1.073712000 |
| H  | -5.586672000 | -1.833187000 | -0.071571000 |
| C  | 1.757488000  | -1.322711000 | 0.130859000  |
| C  | 2.356097000  | -0.346472000 | 0.950387000  |
| C  | 2.547603000  | -2.256304000 | -0.564678000 |
| C  | 3.746419000  | -0.286670000 | 1.018950000  |
| C  | 3.932564000  | -2.157776000 | -0.513026000 |
| H  | 2.056079000  | -3.020366000 | -1.157989000 |
| C  | 4.533671000  | -1.171891000 | 0.277888000  |
| H  | 4.214492000  | 0.452202000  | 1.662495000  |
| H  | 4.544776000  | -2.855380000 | -1.076292000 |
| H  | 5.616630000  | -1.108480000 | 0.332958000  |
| Pd | 0.009478000  | 1.387881000  | -0.086540000 |
| Cl | 0.578079000  | 1.393927000  | -2.316376000 |
| Cl | -0.501386000 | 1.775380000  | 2.137980000  |
| H  | 1.748509000  | 0.305413000  | 1.568185000  |

**TS<sub>Cl</sub>,  $\Delta E_{(\text{SCF Done})} = -1620.802987$  a.u., IF = -215.46  $\text{cm}^{-1}$**

|   |             |              |              |
|---|-------------|--------------|--------------|
| N | 0.785821000 | 0.702669000  | -0.009215000 |
| N | 0.239088000 | 1.840167000  | 0.134012000  |
| C | 2.193813000 | 0.631372000  | -0.084664000 |
| C | 2.962561000 | 1.710262000  | -0.554541000 |
| C | 2.795238000 | -0.575999000 | 0.310214000  |
| C | 4.341679000 | 1.566613000  | -0.633236000 |
| H | 2.468899000 | 2.627384000  | -0.854730000 |
| C | 4.180664000 | -0.697456000 | 0.232756000  |
| H | 2.178957000 | -1.366453000 | 0.729165000  |

|    |              |              |              |
|----|--------------|--------------|--------------|
| C  | 4.951579000  | 0.366048000  | -0.242890000 |
| H  | 4.947578000  | 2.388433000  | -1.002924000 |
| H  | 4.656693000  | -1.618981000 | 0.552680000  |
| H  | 6.030958000  | 0.264417000  | -0.309172000 |
| C  | -1.151423000 | 1.748215000  | 0.145305000  |
| C  | -1.776215000 | 0.478764000  | 0.408138000  |
| C  | -1.914284000 | 2.889247000  | -0.107653000 |
| C  | -3.180178000 | 0.386851000  | 0.275680000  |
| C  | -3.302134000 | 2.764698000  | -0.194563000 |
| H  | -1.419327000 | 3.840768000  | -0.271636000 |
| C  | -3.930908000 | 1.520936000  | -0.020237000 |
| H  | -3.660790000 | -0.570137000 | 0.450291000  |
| H  | -3.903246000 | 3.643231000  | -0.410118000 |
| H  | -5.011541000 | 1.450000000  | -0.099081000 |
| Pd | -0.380759000 | -0.902615000 | -0.461950000 |
| Cl | -1.661938000 | -2.613641000 | -1.235701000 |
| Cl | -0.200992000 | -1.123530000 | 2.593858000  |
| H  | -1.300137000 | -0.143644000 | 1.297143000  |

**TS<sub>Cl'</sub>,  $\Delta E_{(\text{SCF Done})} = -1620.785548$  a.u., IF = -995.53 cm<sup>-1</sup>**

|    |              |              |              |
|----|--------------|--------------|--------------|
| N  | 1.140595000  | 0.488507000  | -0.082556000 |
| N  | 0.628132000  | 1.639357000  | -0.129335000 |
| C  | 2.551694000  | 0.447382000  | -0.099508000 |
| C  | 3.379135000  | 1.586069000  | -0.122284000 |
| C  | 3.118742000  | -0.836047000 | -0.093244000 |
| C  | 4.758593000  | 1.426684000  | -0.139341000 |
| H  | 2.922892000  | 2.569245000  | -0.126385000 |
| C  | 4.503915000  | -0.986164000 | -0.111954000 |
| H  | 2.457214000  | -1.696698000 | -0.078284000 |
| C  | 5.324156000  | 0.143591000  | -0.134412000 |
| H  | 5.402762000  | 2.301479000  | -0.156424000 |
| H  | 4.941722000  | -1.979976000 | -0.109386000 |
| H  | 6.404612000  | 0.029519000  | -0.147913000 |
| C  | -0.781352000 | 1.678117000  | -0.083285000 |
| C  | -1.652939000 | 0.582447000  | 0.190851000  |
| C  | -1.331880000 | 2.952937000  | -0.273096000 |
| C  | -3.045491000 | 0.798178000  | 0.199319000  |
| C  | -2.711481000 | 3.147556000  | -0.250679000 |
| H  | -0.647517000 | 3.776762000  | -0.449950000 |
| C  | -3.572241000 | 2.072673000  | -0.009810000 |
| H  | -3.710289000 | -0.038478000 | 0.389061000  |
| H  | -3.116763000 | 4.141435000  | -0.417315000 |
| H  | -4.647566000 | 2.222581000  | 0.010517000  |
| Pd | -0.984754000 | -1.314019000 | 0.023255000  |

|    |              |              |              |
|----|--------------|--------------|--------------|
| Cl | -1.514397000 | -1.600110000 | -2.175184000 |
| Cl | -0.780503000 | -0.984030000 | 2.500529000  |
| H  | -1.321289000 | 0.073787000  | 1.533403000  |

**TS<sub>Cl</sub>'',  $\Delta E_{(\text{SCF Done})} = -1620.776233$  a.u., IF = -1013.91 cm<sup>-1</sup>**

|    |              |              |              |
|----|--------------|--------------|--------------|
| N  | 0.857161000  | 0.547638000  | -0.296950000 |
| N  | 0.249493000  | 1.622647000  | -0.049676000 |
| C  | 2.270531000  | 0.601184000  | -0.305943000 |
| C  | 3.008880000  | 1.716467000  | 0.125901000  |
| C  | 2.924710000  | -0.544145000 | -0.780247000 |
| C  | 4.396620000  | 1.674333000  | 0.071550000  |
| H  | 2.483359000  | 2.587919000  | 0.498856000  |
| C  | 4.316382000  | -0.574352000 | -0.834982000 |
| H  | 2.330314000  | -1.392216000 | -1.108250000 |
| C  | 5.052839000  | 0.533066000  | -0.408735000 |
| H  | 4.974737000  | 2.529695000  | 0.409503000  |
| H  | 4.823988000  | -1.459883000 | -1.205362000 |
| H  | 6.138402000  | 0.508534000  | -0.443824000 |
| C  | -1.155531000 | 1.566695000  | 0.003766000  |
| C  | -1.952274000 | 0.399006000  | 0.139398000  |
| C  | -1.794550000 | 2.804682000  | -0.180386000 |
| C  | -3.335066000 | 0.476203000  | -0.051981000 |
| C  | -3.177066000 | 2.883686000  | -0.305580000 |
| H  | -1.165112000 | 3.684724000  | -0.266619000 |
| C  | -3.943908000 | 1.718428000  | -0.259061000 |
| H  | -3.943170000 | -0.420584000 | -0.011079000 |
| H  | -3.653189000 | 3.846783000  | -0.461726000 |
| H  | -5.023104000 | 1.764353000  | -0.371915000 |
| Pd | -0.676733000 | -1.218029000 | 0.245041000  |
| Cl | -1.406728000 | -1.935199000 | -1.813491000 |
| Cl | 0.159252000  | -0.973340000 | 2.393785000  |
| H  | -2.045397000 | -0.898339000 | 0.967711000  |

**B<sub>Cl</sub>,  $\Delta E_{(\text{SCF Done})} = -1160.036225$  a.u.**

|   |              |              |              |
|---|--------------|--------------|--------------|
| N | -0.780453000 | 0.589176000  | -0.030183000 |
| N | -0.255916000 | 1.749073000  | -0.036712000 |
| C | -2.196049000 | 0.505662000  | -0.018044000 |
| C | -3.014514000 | 1.635468000  | 0.148643000  |
| C | -2.768670000 | -0.764806000 | -0.170899000 |
| C | -4.395545000 | 1.479450000  | 0.158990000  |
| H | -2.555654000 | 2.609306000  | 0.269616000  |
| C | -4.154985000 | -0.908743000 | -0.160458000 |
| H | -2.131607000 | -1.635228000 | -0.311521000 |
| C | -4.970666000 | 0.211539000  | 0.005333000  |

|    |              |              |              |
|----|--------------|--------------|--------------|
| H  | -5.030838000 | 2.350603000  | 0.290865000  |
| H  | -4.593912000 | -1.894281000 | -0.282424000 |
| H  | -6.051038000 | 0.100458000  | 0.016866000  |
| C  | 1.125297000  | 1.691535000  | -0.030165000 |
| C  | 1.766636000  | 0.422853000  | -0.010126000 |
| C  | 1.879330000  | 2.876598000  | -0.044279000 |
| C  | 3.153488000  | 0.350867000  | -0.002457000 |
| C  | 3.267687000  | 2.795618000  | -0.038709000 |
| H  | 1.361368000  | 3.830597000  | -0.058794000 |
| C  | 3.894560000  | 1.543651000  | -0.018264000 |
| H  | 3.654169000  | -0.609848000 | 0.013966000  |
| H  | 3.865187000  | 3.702007000  | -0.050029000 |
| H  | 4.979985000  | 1.486657000  | -0.014980000 |
| Pd | 0.475452000  | -1.041570000 | 0.010460000  |
| Cl | 1.786276000  | -2.907878000 | 0.070363000  |

**HCl,  $\Delta E_{(\text{SCF Done})} = -460.798054$  a.u.**

|    |             |             |              |
|----|-------------|-------------|--------------|
| Cl | 0.000000000 | 0.000000000 | 0.071636000  |
| H  | 0.000000000 | 0.000000000 | -1.217812000 |

**B<sub>Cl</sub>'',  $\Delta E_{(\text{SCF Done})} = -1620.804947$  a.u.**

|   |              |              |              |
|---|--------------|--------------|--------------|
| N | 0.773879000  | 0.616245000  | 0.000095000  |
| N | 0.143501000  | 1.711385000  | 0.000345000  |
| C | 2.185735000  | 0.672747000  | 0.000162000  |
| C | 2.900227000  | 1.883980000  | -0.000070000 |
| C | 2.868131000  | -0.551737000 | 0.000425000  |
| C | 4.288790000  | 1.853964000  | -0.000007000 |
| H | 2.355900000  | 2.820797000  | -0.000314000 |
| C | 4.261215000  | -0.569891000 | 0.000506000  |
| H | 2.305385000  | -1.480381000 | 0.000590000  |
| C | 4.972904000  | 0.630894000  | 0.000291000  |
| H | 4.845694000  | 2.786547000  | -0.000206000 |
| H | 4.787599000  | -1.519409000 | 0.000733000  |
| H | 6.059096000  | 0.618148000  | 0.000339000  |
| C | -1.244061000 | 1.563773000  | 0.000264000  |
| C | -1.883151000 | 0.306338000  | -0.000065000 |
| C | -2.038590000 | 2.721718000  | 0.000536000  |
| C | -3.257654000 | 0.178942000  | -0.000044000 |
| C | -3.425939000 | 2.613694000  | 0.000538000  |
| H | -1.538391000 | 3.685179000  | 0.000718000  |
| C | -4.029151000 | 1.353817000  | 0.000249000  |
| H | -3.737361000 | -0.792014000 | -0.000339000 |
| H | -4.039207000 | 3.509291000  | 0.000744000  |
| H | -5.112099000 | 1.267918000  | 0.000268000  |

|    |              |              |              |
|----|--------------|--------------|--------------|
| Pd | -0.571444000 | -1.173802000 | -0.000249000 |
| Cl | -0.529242000 | -1.378302000 | -2.302590000 |
| Cl | -0.529764000 | -1.379716000 | 2.301982000  |
| H  | -1.649476000 | -2.257706000 | -0.000530000 |

**I<sub>NO3</sub>,  $\Delta E_{(\text{SCF Done})} = -1260.923318$  a.u.**

|    |              |              |              |
|----|--------------|--------------|--------------|
| N  | 0.612138000  | 0.835380000  | -0.344351000 |
| N  | -0.017384000 | 1.923086000  | -0.321675000 |
| C  | 2.017116000  | 0.944698000  | -0.609353000 |
| C  | 2.714818000  | 2.111170000  | -0.260714000 |
| C  | 2.678229000  | -0.130499000 | -1.215866000 |
| C  | 4.075173000  | 2.197379000  | -0.535636000 |
| H  | 2.187704000  | 2.921291000  | 0.229266000  |
| C  | 4.038788000  | -0.026253000 | -1.495904000 |
| H  | 2.129812000  | -1.030921000 | -1.471480000 |
| C  | 4.738962000  | 1.132989000  | -1.155365000 |
| H  | 4.622283000  | 3.092787000  | -0.256172000 |
| H  | 4.551566000  | -0.855924000 | -1.972430000 |
| H  | 5.802854000  | 1.204403000  | -1.362038000 |
| C  | -1.365850000 | 1.974360000  | 0.060409000  |
| C  | -1.925962000 | 1.207751000  | 1.101358000  |
| C  | -2.138343000 | 2.940889000  | -0.609185000 |
| C  | -3.270868000 | 1.385040000  | 1.420069000  |
| C  | -3.487453000 | 3.077377000  | -0.303378000 |
| H  | -1.668032000 | 3.547575000  | -1.376420000 |
| C  | -4.055976000 | 2.298281000  | 0.710554000  |
| H  | -3.703810000 | 0.812623000  | 2.235236000  |
| H  | -4.092925000 | 3.800422000  | -0.841485000 |
| H  | -5.105209000 | 2.421034000  | 0.963407000  |
| Pd | -0.214788000 | -1.035901000 | -0.144305000 |
| H  | -1.297749000 | 0.549513000  | 1.691678000  |
| O  | -1.796945000 | -0.982448000 | -1.495624000 |
| N  | -2.123699000 | -2.223548000 | -1.263440000 |
| O  | -1.351277000 | -2.793188000 | -0.394196000 |
| O  | -3.044702000 | -2.770569000 | -1.802357000 |
| O  | 0.613077000  | -0.173570000 | 2.585548000  |
| N  | 1.376692000  | -1.097927000 | 2.285448000  |
| O  | 1.242071000  | -1.675068000 | 1.079651000  |
| O  | 2.263745000  | -1.548828000 | 2.985063000  |

**TS<sub>NO3</sub>,  $\Delta E_{(\text{SCF Done})} = -1260.889536$  a.u., IF = -107.08 cm<sup>-1</sup>**

|   |              |              |              |
|---|--------------|--------------|--------------|
| N | -0.022360000 | -2.195212000 | -0.204112000 |
| N | -0.653800000 | -1.095770000 | -0.199757000 |
| C | 1.362303000  | -2.016651000 | -0.202190000 |

|    |              |              |              |
|----|--------------|--------------|--------------|
| C  | 2.178670000  | -3.063905000 | -0.633178000 |
| C  | 1.908030000  | -0.758326000 | 0.209019000  |
| C  | 3.553868000  | -2.844551000 | -0.736038000 |
| H  | 1.732938000  | -4.011338000 | -0.917895000 |
| C  | 3.294812000  | -0.567793000 | 0.064306000  |
| H  | 1.447194000  | -0.275376000 | 1.208335000  |
| C  | 4.108242000  | -1.600613000 | -0.404900000 |
| H  | 4.198755000  | -3.645958000 | -1.084231000 |
| H  | 3.732005000  | 0.379522000  | 0.367073000  |
| H  | 5.179799000  | -1.448470000 | -0.493475000 |
| C  | -2.070263000 | -1.133817000 | -0.231452000 |
| C  | -2.753106000 | -2.232395000 | -0.781710000 |
| C  | -2.763858000 | -0.036374000 | 0.302789000  |
| C  | -4.141841000 | -2.220841000 | -0.797187000 |
| C  | -4.156754000 | -0.050389000 | 0.289912000  |
| H  | -2.213428000 | 0.778396000  | 0.763513000  |
| C  | -4.844996000 | -1.132831000 | -0.262977000 |
| H  | -4.681170000 | -3.057897000 | -1.230351000 |
| H  | -4.702218000 | 0.785898000  | 0.715588000  |
| H  | -5.931055000 | -1.132169000 | -0.280228000 |
| Pd | 0.395317000  | 0.623266000  | -0.443047000 |
| H  | -2.189618000 | -3.062111000 | -1.192370000 |
| O  | 1.117317000  | -0.021894000 | 2.715869000  |
| N  | 0.190314000  | 0.855325000  | 2.921520000  |
| O  | -0.306836000 | 1.457201000  | 1.923963000  |
| O  | -0.180966000 | 1.076853000  | 4.065388000  |
| O  | 1.340483000  | 2.394152000  | -0.909142000 |
| N  | 0.299508000  | 2.922931000  | -1.495762000 |
| O  | -0.716354000 | 2.131015000  | -1.535816000 |
| O  | 0.308350000  | 4.032580000  | -1.951185000 |

**TS<sub>NO3'</sub>,  $\Delta E_{(SCF \text{ Done})} = -1260.886655 \text{ a.u.}, \text{IF} = -1380.50 \text{ cm}^{-1}$**

|   |              |              |              |
|---|--------------|--------------|--------------|
| N | -0.191028000 | 2.286583000  | -0.338103000 |
| N | -0.773028000 | 1.180021000  | -0.131257000 |
| C | 1.191355000  | 2.248903000  | -0.196967000 |
| C | 1.847672000  | 3.482216000  | -0.091630000 |
| C | 1.889987000  | 1.012638000  | -0.058081000 |
| C | 3.205336000  | 3.512236000  | 0.220707000  |
| H | 1.272312000  | 4.394213000  | -0.212947000 |
| C | 3.242419000  | 1.084175000  | 0.303665000  |
| H | 1.898787000  | -0.125242000 | -0.866851000 |
| C | 3.894261000  | 2.316581000  | 0.436981000  |
| H | 3.720134000  | 4.463729000  | 0.311749000  |
| H | 3.812236000  | 0.169650000  | 0.437319000  |



|    |              |              |              |
|----|--------------|--------------|--------------|
| H  | 4.949032000  | 2.337072000  | 0.695303000  |
| C  | -2.195805000 | 1.191893000  | -0.207890000 |
| C  | -2.912883000 | 2.318771000  | 0.224504000  |
| C  | -2.854426000 | 0.074894000  | -0.737233000 |
| C  | -4.299775000 | 2.316894000  | 0.128254000  |
| C  | -4.243329000 | 0.097805000  | -0.845074000 |
| H  | -2.285608000 | -0.780968000 | -1.083833000 |
| C  | -4.966952000 | 1.209592000  | -0.407785000 |
| H  | -4.862969000 | 3.177726000  | 0.476252000  |
| H  | -4.758564000 | -0.760210000 | -1.265472000 |
| H  | -6.050800000 | 1.213074000  | -0.478509000 |
| Pd | 0.384847000  | -0.435919000 | 0.325180000  |
| H  | -2.378397000 | 3.166208000  | 0.638227000  |
| O  | 2.424636000  | -1.208636000 | -1.469015000 |
| N  | 2.433622000  | -2.170563000 | -0.596191000 |
| O  | 1.726718000  | -2.026114000 | 0.481946000  |
| O  | 3.095060000  | -3.162641000 | -0.770178000 |
| O  | -1.085032000 | -1.561525000 | 1.179802000  |
| N  | -1.431002000 | -2.640708000 | 0.467404000  |
| O  | -1.016554000 | -2.717706000 | -0.699396000 |
| O  | -2.154356000 | -3.447117000 | 1.021944000  |

**TS<sub>NO3</sub>'',  $\Delta E_{(SCF\ Done)} = -1260.863171$  a.u., IF = -1211.96 cm<sup>-1</sup>**

|   |              |              |              |
|---|--------------|--------------|--------------|
| N | -0.815581000 | -1.808778000 | -0.747371000 |
| N | -1.243896000 | -0.688625000 | -0.360724000 |
| C | 0.586114000  | -1.977327000 | -0.666889000 |
| C | 1.079152000  | -3.092800000 | -1.353738000 |
| C | 1.464759000  | -1.156154000 | 0.102757000  |
| C | 2.442714000  | -3.383770000 | -1.338134000 |
| H | 0.376084000  | -3.713324000 | -1.900765000 |
| C | 2.836982000  | -1.495118000 | 0.112793000  |
| H | 1.001425000  | -1.040372000 | 1.366611000  |
| C | 3.326107000  | -2.589918000 | -0.599074000 |
| H | 2.816061000  | -4.240416000 | -1.892209000 |
| H | 3.523184000  | -0.899280000 | 0.709452000  |
| H | 4.384916000  | -2.830435000 | -0.570805000 |
| C | -2.646404000 | -0.522108000 | -0.383650000 |
| C | -3.557094000 | -1.514552000 | -0.792236000 |
| C | -3.111731000 | 0.732821000  | 0.038610000  |
| C | -4.918216000 | -1.239077000 | -0.775206000 |
| C | -4.479634000 | 0.999092000  | 0.053221000  |
| H | -2.388142000 | 1.480076000  | 0.350813000  |
| C | -5.382789000 | 0.014979000  | -0.353425000 |
| H | -5.626723000 | -2.000374000 | -1.089721000 |

|    |              |              |              |
|----|--------------|--------------|--------------|
| H  | -4.839025000 | 1.970137000  | 0.380594000  |
| H  | -6.449721000 | 0.220067000  | -0.343043000 |
| Pd | 1.039876000  | 0.897169000  | 0.170790000  |
| H  | -3.178140000 | -2.477737000 | -1.114132000 |
| O  | 0.576550000  | -1.092009000 | 2.558384000  |
| N  | 0.405086000  | 0.118770000  | 2.988473000  |
| O  | 0.620288000  | 1.098751000  | 2.178836000  |
| O  | 0.058294000  | 0.325512000  | 4.125786000  |
| O  | 1.471155000  | 1.264112000  | -1.811848000 |
| N  | 1.236060000  | 2.546752000  | -1.721166000 |
| O  | 0.894991000  | 2.917488000  | -0.534208000 |
| O  | 1.333015000  | 3.289727000  | -2.659176000 |

**TS<sub>NO3'''</sub>,  $\Delta E_{(\text{SCF Done})} = -1260.848494$  a.u., IF = -1348.43 cm<sup>-1</sup>**

|    |              |              |              |
|----|--------------|--------------|--------------|
| N  | 1.103857000  | 0.902106000  | -0.158263000 |
| N  | 0.577494000  | 1.883955000  | -0.749690000 |
| C  | 2.491956000  | 0.741698000  | -0.362407000 |
| C  | 3.271797000  | 1.580422000  | -1.182590000 |
| C  | 3.084474000  | -0.339982000 | 0.308687000  |
| C  | 4.629578000  | 1.327513000  | -1.321306000 |
| H  | 2.796105000  | 2.410108000  | -1.692428000 |
| C  | 4.449092000  | -0.583812000 | 0.162792000  |
| H  | 2.466119000  | -0.969080000 | 0.940659000  |
| C  | 5.221416000  | 0.246755000  | -0.650890000 |
| H  | 5.236522000  | 1.970031000  | -1.953174000 |
| H  | 4.906729000  | -1.420072000 | 0.682778000  |
| H  | 6.284892000  | 0.056569000  | -0.766944000 |
| C  | -0.817973000 | 2.021274000  | -0.576787000 |
| C  | -1.681884000 | 1.082019000  | 0.065579000  |
| C  | -1.348524000 | 3.198817000  | -1.116016000 |
| C  | -3.062617000 | 1.372614000  | 0.111177000  |
| C  | -2.716910000 | 3.462134000  | -1.040582000 |
| H  | -0.667487000 | 3.894807000  | -1.595381000 |
| C  | -3.580442000 | 2.552504000  | -0.424505000 |
| H  | -3.733019000 | 0.666689000  | 0.595023000  |
| H  | -3.110167000 | 4.380807000  | -1.466881000 |
| H  | -4.645263000 | 2.757781000  | -0.366969000 |
| Pd | -1.127090000 | -0.937227000 | 0.151199000  |
| H  | -1.310014000 | 0.695130000  | 1.334409000  |
| O  | -1.363017000 | -1.634707000 | -1.773933000 |
| N  | -0.985727000 | -2.852710000 | -1.480143000 |
| O  | -0.686674000 | -3.001349000 | -0.236561000 |
| O  | -0.931018000 | -3.727040000 | -2.301169000 |
| O  | -1.085653000 | -0.238310000 | 2.162267000  |

|   |             |              |             |
|---|-------------|--------------|-------------|
| N | 0.187141000 | -0.116104000 | 2.765353000 |
| O | 0.450385000 | 0.984108000  | 3.194644000 |
| O | 0.841296000 | -1.135553000 | 2.811508000 |

**B<sub>NO3</sub>,  $\Delta E_{(\text{SCF Done})} = -980.074700$  a.u.**

|    |              |              |              |
|----|--------------|--------------|--------------|
| N  | 0.737922000  | -0.915922000 | -0.030884000 |
| N  | 0.219934000  | -2.078303000 | -0.035040000 |
| C  | 2.158119000  | -0.841277000 | -0.016970000 |
| C  | 2.758957000  | 0.407833000  | -0.226975000 |
| C  | 2.951175000  | -1.981860000 | 0.203449000  |
| C  | 4.149689000  | 0.513263000  | -0.224034000 |
| H  | 2.147635000  | 1.286600000  | -0.396846000 |
| C  | 4.334951000  | -1.860402000 | 0.207126000  |
| H  | 2.470870000  | -2.938185000 | 0.369981000  |
| C  | 4.940129000  | -0.615356000 | -0.006940000 |
| H  | 4.610746000  | 1.482165000  | -0.390231000 |
| H  | 4.948098000  | -2.739912000 | 0.381824000  |
| H  | 6.022942000  | -0.529394000 | 0.000032000  |
| C  | -1.162462000 | -2.047229000 | -0.028933000 |
| C  | -1.803844000 | -0.782075000 | -0.013713000 |
| C  | -1.898800000 | -3.242416000 | -0.039966000 |
| C  | -3.191721000 | -0.728682000 | -0.007591000 |
| C  | -3.289011000 | -3.172243000 | -0.035262000 |
| H  | -1.374683000 | -4.193178000 | -0.051482000 |
| C  | -3.927330000 | -1.925450000 | -0.019331000 |
| H  | -3.706163000 | 0.228436000  | 0.004941000  |
| H  | -3.879303000 | -4.083426000 | -0.043863000 |
| H  | -5.013438000 | -1.880208000 | -0.016489000 |
| Pd | -0.531098000 | 0.706430000  | 0.003999000  |
| O  | -1.759953000 | 2.384717000  | 0.047809000  |
| N  | -0.791407000 | 3.263545000  | 0.054758000  |
| O  | 0.382911000  | 2.747003000  | 0.037286000  |
| O  | -1.008015000 | 4.448458000  | 0.076300000  |

**HNO<sub>3</sub>,  $\Delta E_{(\text{SCF Done})} = -280.846432$  a.u.**

|   |              |              |              |
|---|--------------|--------------|--------------|
| H | -1.729078000 | 0.197181000  | -0.000963000 |
| O | -1.122821000 | -0.571419000 | 0.000147000  |
| N | 0.147604000  | 0.038209000  | -0.000053000 |
| O | 0.146921000  | 1.255007000  | 0.000062000  |
| O | 1.062882000  | -0.741668000 | -0.000043000 |

**D<sub>Cl</sub>,  $\Delta E_{(\text{SCF Done})} = -1579.820675$  a.u.**

|   |             |             |              |
|---|-------------|-------------|--------------|
| N | 1.448434000 | 0.819990000 | -0.462367000 |
| N | 2.059884000 | 0.244954000 | -1.404333000 |

|    |              |              |              |
|----|--------------|--------------|--------------|
| C  | 1.517475000  | 2.218078000  | -0.311923000 |
| C  | 0.553018000  | 2.847815000  | 0.498788000  |
| C  | 2.543770000  | 2.960973000  | -0.931638000 |
| C  | 0.614876000  | 4.225611000  | 0.680083000  |
| H  | -0.251845000 | 2.271267000  | 0.943159000  |
| C  | 2.586120000  | 4.333971000  | -0.740362000 |
| H  | 3.282267000  | 2.452127000  | -1.540031000 |
| C  | 1.628212000  | 4.968023000  | 0.065323000  |
| H  | -0.128784000 | 4.720814000  | 1.295789000  |
| H  | 3.371678000  | 4.916736000  | -1.210789000 |
| H  | 1.676497000  | 6.042299000  | 0.214476000  |
| C  | 2.048810000  | -1.129235000 | -1.307139000 |
| C  | 1.421618000  | -1.762253000 | -0.201670000 |
| C  | 2.654276000  | -1.927885000 | -2.287593000 |
| C  | 1.321344000  | -3.133651000 | -0.079223000 |
| C  | 2.593770000  | -3.315080000 | -2.165421000 |
| H  | 3.149869000  | -1.445373000 | -3.123805000 |
| C  | 1.940451000  | -3.907728000 | -1.078736000 |
| H  | 0.811620000  | -3.603668000 | 0.752478000  |
| H  | 3.049055000  | -3.941813000 | -2.925109000 |
| H  | 1.897671000  | -4.989640000 | -0.995101000 |
| Pd | 0.765058000  | -0.414170000 | 1.084879000  |
| O  | -1.143877000 | -0.033340000 | 0.644522000  |
| C  | -1.644685000 | -0.379941000 | -0.548862000 |
| O  | -1.002200000 | -0.761519000 | -1.506262000 |
| C  | -3.122363000 | -0.138236000 | -0.530223000 |
| C  | -3.728474000 | 0.270910000  | -1.729956000 |
| C  | -3.886462000 | -0.311491000 | 0.640314000  |
| C  | -5.103200000 | 0.473895000  | -1.761381000 |
| H  | -3.122265000 | 0.391627000  | -2.621303000 |
| C  | -5.263824000 | -0.108735000 | 0.593519000  |
| H  | -3.405091000 | -0.622310000 | 1.560609000  |
| C  | -5.870379000 | 0.288809000  | -0.600423000 |
| H  | -5.584988000 | 0.761969000  | -2.690796000 |
| H  | -5.862346000 | -0.259003000 | 1.486521000  |
| H  | -6.943546000 | 0.452039000  | -0.633726000 |
| Cl | 0.508930000  | -1.649062000 | 2.960186000  |

**TS1<sub>Cl</sub>,  $\Delta E_{(\text{SCF Done})} = -1579.820544$  a.u., IF = -139.86 cm<sup>-1</sup>**

|   |              |              |              |
|---|--------------|--------------|--------------|
| N | -1.536146000 | -0.501183000 | -0.578641000 |
| N | -1.829066000 | 0.236554000  | -1.565545000 |
| C | -2.002009000 | -1.826160000 | -0.527651000 |
| C | -1.410806000 | -2.700286000 | 0.407358000  |
| C | -3.051345000 | -2.260733000 | -1.365992000 |

|    |              |              |              |
|----|--------------|--------------|--------------|
| C  | -1.866805000 | -4.010780000 | 0.493377000  |
| H  | -0.581678000 | -2.366284000 | 1.022440000  |
| C  | -3.490689000 | -3.571617000 | -1.265151000 |
| H  | -3.499271000 | -1.567691000 | -2.068191000 |
| C  | -2.904717000 | -4.446861000 | -0.337209000 |
| H  | -1.411852000 | -4.693372000 | 1.203544000  |
| H  | -4.298022000 | -3.917630000 | -1.902647000 |
| H  | -3.262311000 | -5.469217000 | -0.262160000 |
| C  | -1.455700000 | 1.552982000  | -1.382873000 |
| C  | -0.659402000 | 1.923468000  | -0.255527000 |
| C  | -1.902527000 | 2.552684000  | -2.254956000 |
| C  | -0.262722000 | 3.241574000  | -0.031228000 |
| C  | -1.554921000 | 3.880245000  | -2.003789000 |
| H  | -2.529121000 | 2.274045000  | -3.095995000 |
| C  | -0.760461000 | 4.220192000  | -0.896279000 |
| H  | 0.398925000  | 3.495979000  | 0.787253000  |
| H  | -1.895854000 | 4.659625000  | -2.677456000 |
| H  | -0.494935000 | 5.257959000  | -0.719417000 |
| Pd | -0.774332000 | 0.478147000  | 1.103781000  |
| O  | 1.031651000  | -0.522387000 | 0.882879000  |
| C  | 1.707664000  | 0.068967000  | -0.044007000 |
| O  | 1.274748000  | 1.040523000  | -0.718184000 |
| C  | 3.072376000  | -0.471258000 | -0.311556000 |
| C  | 3.787049000  | 0.010052000  | -1.420559000 |
| C  | 3.635096000  | -1.441306000 | 0.534735000  |
| C  | 5.062988000  | -0.482652000 | -1.678512000 |
| H  | 3.340400000  | 0.761330000  | -2.061667000 |
| C  | 4.914129000  | -1.922092000 | 0.268359000  |
| H  | 3.079396000  | -1.798050000 | 1.394426000  |
| C  | 5.626180000  | -1.446559000 | -0.836643000 |
| H  | 5.620523000  | -0.111317000 | -2.532929000 |
| H  | 5.356574000  | -2.666052000 | 0.923689000  |
| H  | 6.623461000  | -1.825330000 | -1.040428000 |
| Cl | -0.271878000 | 1.556436000  | 3.023290000  |

**P<sub>Cl</sub>,  $\Delta E_{(\text{SCF Done})} = -1579.876497$  a.u.**

|   |             |              |              |
|---|-------------|--------------|--------------|
| N | 1.487230000 | 0.321534000  | -0.625740000 |
| N | 1.482481000 | -0.384561000 | -1.664530000 |
| C | 2.063232000 | 1.621212000  | -0.691118000 |
| C | 1.993001000 | 2.421018000  | 0.462076000  |
| C | 2.695206000 | 2.087830000  | -1.858954000 |
| C | 2.562754000 | 3.691486000  | 0.449717000  |
| H | 1.489851000 | 2.057109000  | 1.354731000  |
| C | 3.258191000 | 3.356302000  | -1.854357000 |

|    |              |              |              |
|----|--------------|--------------|--------------|
| H  | 2.738660000  | 1.456497000  | -2.738312000 |
| C  | 3.195216000  | 4.158255000  | -0.704964000 |
| H  | 2.511942000  | 4.313491000  | 1.337318000  |
| H  | 3.751058000  | 3.726544000  | -2.747708000 |
| H  | 3.640813000  | 5.148278000  | -0.714017000 |
| C  | 0.875600000  | -1.659624000 | -1.524842000 |
| C  | -0.469429000 | -1.820339000 | -1.139450000 |
| C  | 1.634850000  | -2.794484000 | -1.839660000 |
| C  | -1.026813000 | -3.088155000 | -1.015517000 |
| C  | 1.086365000  | -4.065788000 | -1.682852000 |
| H  | 2.658117000  | -2.661229000 | -2.175744000 |
| C  | -0.237092000 | -4.213608000 | -1.259355000 |
| H  | -2.076000000 | -3.183890000 | -0.754802000 |
| H  | 1.690177000  | -4.940151000 | -1.902277000 |
| H  | -0.669509000 | -5.202747000 | -1.150197000 |
| Pd | 0.988673000  | -0.516593000 | 1.211258000  |
| O  | -1.003575000 | -0.005050000 | 1.022265000  |
| C  | -1.695014000 | -0.041803000 | -0.018829000 |
| O  | -1.342954000 | -0.716046000 | -1.121114000 |
| C  | -2.955727000 | 0.684552000  | -0.117908000 |
| C  | -3.789253000 | 0.535068000  | -1.244964000 |
| C  | -3.338750000 | 1.530530000  | 0.943150000  |
| C  | -4.988585000 | 1.234717000  | -1.306671000 |
| H  | -3.494235000 | -0.120339000 | -2.056233000 |
| C  | -4.542171000 | 2.220410000  | 0.870684000  |
| H  | -2.693964000 | 1.630921000  | 1.809311000  |
| C  | -5.365108000 | 2.074157000  | -0.252178000 |
| H  | -5.633275000 | 1.125174000  | -2.172838000 |
| H  | -4.842594000 | 2.870939000  | 1.685745000  |
| H  | -6.305332000 | 2.615238000  | -0.304744000 |
| Cl | 0.823573000  | -1.556057000 | 3.197090000  |

**$D_{\text{NO}_3}$ ,  $\Delta E_{(\text{SCF Done})} = -1399.85299$  a.u.**

|   |             |              |              |
|---|-------------|--------------|--------------|
| N | 1.591608000 | 0.504028000  | -0.751016000 |
| N | 2.048922000 | -0.256002000 | -1.650998000 |
| C | 1.890003000 | 1.879016000  | -0.759276000 |
| C | 1.111228000 | 2.740586000  | 0.038833000  |
| C | 2.954211000 | 2.376627000  | -1.543128000 |
| C | 1.392774000 | 4.102151000  | 0.038201000  |
| H | 0.290503000 | 2.352527000  | 0.631030000  |
| C | 3.217765000 | 3.736873000  | -1.528794000 |
| H | 3.546458000 | 1.693172000  | -2.139860000 |
| C | 2.442191000 | 4.601446000  | -0.739793000 |
| H | 0.794772000 | 4.773488000  | 0.645525000  |

|    |              |              |              |
|----|--------------|--------------|--------------|
| H  | 4.033709000  | 4.131446000  | -2.125867000 |
| H  | 2.663164000  | 5.664367000  | -0.730167000 |
| C  | 1.812596000  | -1.595694000 | -1.418329000 |
| C  | 1.059284000  | -1.968657000 | -0.273522000 |
| C  | 2.312925000  | -2.585921000 | -2.271141000 |
| C  | 0.748766000  | -3.290234000 | 0.003108000  |
| C  | 2.038487000  | -3.923171000 | -1.976415000 |
| H  | 2.903364000  | -2.300122000 | -3.135574000 |
| C  | 1.276924000  | -4.271726000 | -0.851703000 |
| H  | 0.134874000  | -3.564013000 | 0.855824000  |
| H  | 2.412491000  | -4.703296000 | -2.631394000 |
| H  | 1.073960000  | -5.317425000 | -0.640919000 |
| Pd | 0.733537000  | -0.434468000 | 0.901382000  |
| O  | 0.061856000  | -1.325109000 | 2.621781000  |
| N  | 0.070321000  | -0.230885000 | 3.380712000  |
| O  | 0.504364000  | 0.802307000  | 2.768934000  |
| O  | -0.299438000 | -0.267624000 | 4.515049000  |
| O  | -1.126500000 | 0.174503000  | 0.368647000  |
| C  | -1.710294000 | -0.390004000 | -0.681726000 |
| O  | -1.187287000 | -1.133957000 | -1.492641000 |
| C  | -3.128112000 | 0.102575000  | -0.774499000 |
| C  | -3.688146000 | 0.221909000  | -2.056338000 |
| C  | -3.873049000 | 0.435829000  | 0.371546000  |
| C  | -5.007634000 | 0.642881000  | -2.183341000 |
| H  | -3.098320000 | -0.045987000 | -2.926037000 |
| C  | -5.196192000 | 0.849297000  | 0.229803000  |
| H  | -3.425335000 | 0.349442000  | 1.354788000  |
| C  | -5.760494000 | 0.960112000  | -1.042851000 |
| H  | -5.459034000 | 0.708497000  | -3.168722000 |
| H  | -5.783236000 | 1.089076000  | 1.110839000  |
| H  | -6.789386000 | 1.290037000  | -1.151910000 |

**TS1<sub>NO3</sub>,  $\Delta E_{(\text{SCF Done})} = -1399.852805$  a.u., IF = -47.6 cm<sup>-1</sup>**

|   |              |              |              |
|---|--------------|--------------|--------------|
| N | -1.487003000 | -0.368409000 | -0.915495000 |
| N | -1.724835000 | 0.443194000  | -1.857474000 |
| C | -1.939580000 | -1.695465000 | -0.994850000 |
| C | -1.408806000 | -2.639739000 | -0.091819000 |
| C | -2.910312000 | -2.069262000 | -1.951842000 |
| C | -1.841792000 | -3.958611000 | -0.159845000 |
| H | -0.658175000 | -2.346916000 | 0.633044000  |
| C | -3.328301000 | -3.388709000 | -2.001646000 |
| H | -3.311780000 | -1.324161000 | -2.628141000 |
| C | -2.798898000 | -4.334576000 | -1.108243000 |
| H | -1.434969000 | -4.693114000 | 0.527191000  |

|    |              |              |              |
|----|--------------|--------------|--------------|
| H  | -4.074098000 | -3.688580000 | -2.730832000 |
| H  | -3.139987000 | -5.364420000 | -1.151571000 |
| C  | -1.370783000 | 1.744978000  | -1.559209000 |
| C  | -0.664424000 | 2.005531000  | -0.348051000 |
| C  | -1.734548000 | 2.807931000  | -2.390900000 |
| C  | -0.280967000 | 3.296920000  | 0.011709000  |
| C  | -1.389708000 | 4.106785000  | -2.007785000 |
| H  | -2.289804000 | 2.609627000  | -3.301885000 |
| C  | -0.689268000 | 4.349849000  | -0.814014000 |
| H  | 0.305264000  | 3.478877000  | 0.906843000  |
| H  | -1.661904000 | 4.941459000  | -2.645701000 |
| H  | -0.433669000 | 5.368205000  | -0.537599000 |
| Pd | -0.787774000 | 0.466620000  | 0.859321000  |
| O  | -0.264675000 | 1.261234000  | 2.665384000  |
| N  | -0.583477000 | 0.201145000  | 3.407156000  |
| O  | -1.084361000 | -0.754595000 | 2.725713000  |
| O  | -0.401718000 | 0.201411000  | 4.586210000  |
| O  | 1.069503000  | -0.411725000 | 0.585386000  |
| C  | 1.796741000  | 0.207183000  | -0.299350000 |
| O  | 1.423664000  | 1.177401000  | -0.979441000 |
| C  | 3.172791000  | -0.368037000 | -0.473135000 |
| C  | 3.945505000  | 0.079691000  | -1.556081000 |
| C  | 3.679366000  | -1.325790000 | 0.419973000  |
| C  | 5.227854000  | -0.431175000 | -1.737746000 |
| H  | 3.539361000  | 0.822519000  | -2.232908000 |
| C  | 4.965744000  | -1.824624000 | 0.229392000  |
| H  | 3.077034000  | -1.661311000 | 1.256219000  |
| C  | 5.737834000  | -1.381631000 | -0.847971000 |
| H  | 5.832417000  | -0.081546000 | -2.569178000 |
| H  | 5.365324000  | -2.559157000 | 0.921933000  |
| H  | 6.739785000  | -1.774813000 | -0.993033000 |

**$P_{\text{NO}_3}$ ,  $\Delta E_{(\text{SCF Done})} = -1399.926669$  a.u.**

|   |              |              |              |
|---|--------------|--------------|--------------|
| N | -0.822740000 | -0.855811000 | -0.931880000 |
| N | 0.151834000  | -0.272087000 | -1.489471000 |
| C | -0.857893000 | -2.262743000 | -0.871697000 |
| C | -2.043710000 | -2.870482000 | -0.422690000 |
| C | 0.258002000  | -3.034186000 | -1.255342000 |
| C | -2.116159000 | -4.258386000 | -0.366567000 |
| H | -2.893988000 | -2.263583000 | -0.130094000 |
| C | 0.167973000  | -4.416188000 | -1.189321000 |
| H | 1.164460000  | -2.543672000 | -1.589095000 |
| C | -1.014364000 | -5.029778000 | -0.747324000 |
| H | -3.028278000 | -4.736751000 | -0.025553000 |



|    |              |              |              |
|----|--------------|--------------|--------------|
| H  | 1.019664000  | -5.023857000 | -1.477808000 |
| H  | -1.071613000 | -6.112900000 | -0.697645000 |
| C  | -0.038577000 | 1.128235000  | -1.421194000 |
| C  | 1.020737000  | 1.976453000  | -1.057515000 |
| C  | -1.328639000 | 1.678956000  | -1.723004000 |
| C  | 0.797802000  | 3.349848000  | -0.992698000 |
| C  | -1.517341000 | 3.081952000  | -1.648573000 |
| H  | -2.013869000 | 1.093368000  | -2.337959000 |
| C  | -0.462575000 | 3.902265000  | -1.279759000 |
| H  | 1.625480000  | 3.987144000  | -0.696902000 |
| H  | -2.481611000 | 3.501962000  | -1.916413000 |
| H  | -0.597290000 | 4.977398000  | -1.224325000 |
| Pd | -2.010823000 | 0.464892000  | 0.069410000  |
| O  | -3.162703000 | 1.674367000  | 1.256841000  |
| N  | -3.515036000 | 0.696246000  | 2.051410000  |
| O  | -2.985872000 | -0.437468000 | 1.684320000  |
| O  | -4.231527000 | 0.828357000  | 2.990180000  |
| O  | 1.437225000  | 0.351235000  | 1.016352000  |
| C  | 2.403667000  | 0.663421000  | 0.356896000  |
| O  | 2.268138000  | 1.493009000  | -0.767003000 |
| C  | 3.801686000  | 0.272621000  | 0.587786000  |
| C  | 4.846602000  | 0.666200000  | -0.265939000 |
| C  | 4.072460000  | -0.522882000 | 1.715137000  |
| C  | 6.149732000  | 0.261144000  | 0.009609000  |
| H  | 4.637498000  | 1.281601000  | -1.133415000 |
| C  | 5.377913000  | -0.920342000 | 1.984022000  |
| H  | 3.254426000  | -0.813018000 | 2.366051000  |
| C  | 6.415870000  | -0.529337000 | 1.131861000  |
| H  | 6.959106000  | 0.563048000  | -0.647944000 |
| H  | 5.589300000  | -1.531249000 | 2.856218000  |
| H  | 7.434982000  | -0.839582000 | 1.343988000  |
